# Supplementary material for: A Pipeline to Call Multilevel Expression Changes between Cancer and Normal Tissues and Its Applications in Repurposing Drugs Effective for Gastric Cancer
Source: Biomed Res Int. 2020 Aug 5;2020:3451610. doi: 10.1155/2020/3451610 (PMC7428949; doi:10.1155/2020/3451610)
Supplement: Supplementary 1 — Supplementary Table 1: results file for expression difference analysis using DESeq2 software. [file 3451610.f1.xlsx]

## Sheet: Sheet1
Figure S1 Results of differentially expressed genes in normal and cancer samples in gastric cancer
gene_id	baseMean	log2FoldChange	lfcSE	stat	pvalue	padj
COL10A1	5007.76	7.56665	0.343108	22.0533	8.88328e-108	1.52508e-103
CSAG2	26.7768	22.88	1.06343	21.5153	1.11963e-102	9.6109e-99
CST1	9611.28	7.80099	0.407134	19.1608	7.87122e-82	4.50444e-78
ESM1	758.089	4.92264	0.262329	18.7651	1.45619e-78	6.24995e-75
KRTAP3-1	31.2529	21.5046	1.14839	18.726	3.03995e-78	1.0438e-74
HOXC9	370.333	7.0598	0.400238	17.639	1.23631e-69	3.53749e-66
CLDN1	9834.49	4.336	0.26049	16.6456	3.25886e-62	7.99258e-59
COL11A1	3203.96	6.58798	0.403077	16.3442	4.7832e-60	1.02647e-56
WNT2	887.805	4.8296	0.299184	16.1426	1.28044e-58	2.44251e-55
CTHRC1	4760.15	3.4571	0.224677	15.387	2.0025e-53	3.4379e-50
CIDEB	4669.69	-2.55122	0.165976	-15.3711	2.55924e-53	3.99427e-50
SALL4	640.117	5.70043	0.371918	15.3271	5.03906e-53	7.20921e-50
ACAN	1469.5	4.03023	0.26345	15.2979	7.895e-53	1.04263e-49
INHBA	4239.36	3.71815	0.244375	15.2149	2.81467e-52	3.4516e-49
HOXC8	262.608	5.70859	0.375875	15.1875	4.28149e-52	4.9003e-49
DAB1	479.226	-2.1873	0.145912	-14.9905	8.46591e-51	9.08392e-48
HOXC10	1535.7	7.77104	0.520459	14.9311	2.06702e-50	2.08744e-47
ENPP7	1093.38	-7.60552	0.512611	-14.8368	8.46826e-50	8.07683e-47
CBR1	8757.47	-2.65731	0.181486	-14.642	1.51524e-48	1.36914e-45
GABRD	288.563	3.09693	0.212201	14.5943	3.05228e-48	2.62007e-45
GAD1	410.49	5.57868	0.383474	14.5477	6.03828e-48	4.93644e-45
MTHFD1L	3235.38	1.818	0.125607	14.4736	1.77826e-47	1.38769e-44
CIDEC	1567.29	-3.77813	0.264445	-14.287	2.6376e-46	1.9688e-43
RCC2	21868.3	1.57522	0.110611	14.241	5.09684e-46	3.64594e-43
MEP1B	1767.69	-7.08549	0.502883	-14.0897	4.39119e-45	3.01552e-42
SLC28A1	203.94	-6.10008	0.434941	-14.0251	1.09502e-44	7.23053e-42
STRA6	1624.97	5.07219	0.363801	13.9422	3.50943e-44	2.23148e-41
BGN	65288.1	2.97257	0.214842	13.8361	1.54382e-43	9.46581e-41
MMP11	16132.4	4.44559	0.325615	13.6529	1.93929e-42	1.14806e-39
CA7	126.756	-5.39734	0.397028	-13.5944	4.32454e-42	2.47479e-39
IGF2BP3	2309.35	4.76976	0.350957	13.5908	4.54366e-42	2.51631e-39
ABHD6	1789.27	-1.64823	0.122015	-13.5085	1.39397e-41	7.47863e-39
ASPDH	52.8654	-3.97071	0.295173	-13.4521	2.99199e-41	1.55656e-38
ADAMTS2	9068.35	2.9532	0.219817	13.4348	3.78181e-41	1.90959e-38
CELA2A	37.4726	-5.89706	0.439378	-13.4214	4.53135e-41	2.22269e-38
AQP10	663.14	-7.05607	0.526203	-13.4094	5.32741e-41	2.54058e-38
CST4	130.231	8.51014	0.635841	13.3841	7.49231e-41	3.47643e-38
ATAD2	6712.26	2.14177	0.160126	13.3756	8.40114e-41	3.79555e-38
KIF14	1581.52	2.7354	0.20482	13.3552	1.10482e-40	4.7419e-38
ANLN	6774.04	2.2958	0.1719	13.3555	1.10045e-40	4.7419e-38
TREH	537.452	-4.67014	0.350203	-13.3355	1.43863e-40	6.024e-38
LRP8	1999.02	2.79082	0.209601	13.3149	1.89659e-40	7.75253e-38
FAP	2221.36	3.08097	0.232622	13.2445	4.85254e-40	1.9374e-37
WNT7B	882.805	5.84948	0.441911	13.2368	5.37975e-40	2.09908e-37
CENPF	9608.69	2.67149	0.202455	13.1955	9.3187e-40	3.55519e-37
KRT80	3279.61	4.51039	0.342868	13.1549	1.59534e-39	5.95408e-37
XRCC2	611.17	2.22974	0.170525	13.0757	4.5309e-39	1.65503e-36
COL1A1	540243	3.27382	0.25117	13.0343	7.81135e-39	2.79386e-36
MAL	828.552	-4.46949	0.343701	-13.004	1.16103e-38	4.06788e-36
ASB11	58.8581	-5.73346	0.442339	-12.9617	2.01787e-38	6.92857e-36
SLC5A4	152.952	-3.97586	0.307819	-12.9162	3.64593e-38	1.22732e-35
ECT2	10342.8	2.31525	0.179413	12.9046	4.24109e-38	1.40021e-35
ATAD5	1283.86	1.84989	0.144016	12.845	9.17272e-38	2.97127e-35
BEST4	191.601	-4.00686	0.311982	-12.8432	9.38606e-38	2.98407e-35
ADAM12	1767.93	3.58004	0.280265	12.7738	2.29666e-37	7.16893e-35
ZSWIM4	3343.24	1.54806	0.12143	12.7485	3.17761e-37	9.74164e-35
SLC25A34	439.39	-3.47125	0.272743	-12.7272	4.17767e-37	1.23659e-34
BAAT	732.469	6.43047	0.505246	12.7274	4.16446e-37	1.23659e-34
MS4A10	844.585	-8.15219	0.640825	-12.7214	4.49733e-37	1.30865e-34
E2F3	2615.16	1.38456	0.109222	12.6766	7.97101e-37	2.28077e-34
MTBP	772.914	1.94953	0.154346	12.6309	1.42642e-36	4.01456e-34
ENPP3	456.3	-4.68039	0.371267	-12.6066	1.94306e-36	5.38039e-34
PIWIL1	539.974	7.53678	0.598168	12.5998	2.11733e-36	5.76989e-34
NAALADL1	1148.15	-3.48293	0.276688	-12.5879	2.46074e-36	6.60094e-34
BTG2	29180.6	-2.43258	0.194721	-12.4926	8.19107e-36	2.16345e-33
AJUBA	3156.01	2.41711	0.193955	12.4623	1.19922e-35	3.11941e-33
KLK6	5704.05	6.84486	0.550883	12.4252	1.90655e-35	4.88531e-33
IBSP	88.3189	7.13684	0.574652	12.4194	2.05064e-35	5.17726e-33
SLC2A7	23.7303	-5.45851	0.440599	-12.3888	3.00338e-35	7.47276e-33
LRFN4	5495.27	2.11247	0.171051	12.3499	4.87437e-35	1.19547e-32
PTGDR2	638.077	-2.03689	0.165119	-12.3359	5.80322e-35	1.40324e-32
SIGLEC11	142.813	-3.41217	0.276688	-12.3322	6.07629e-35	1.44886e-32
SULF1	27162.8	2.82629	0.22973	12.3027	8.76496e-35	2.06133e-32
LEAP2	169.559	-3.55767	0.289312	-12.297	9.39944e-35	2.18067e-32
OTX1	877.604	2.88138	0.235843	12.2174	2.51053e-34	5.74678e-32
SLC35G1	1390.57	-2.36138	0.193301	-12.2161	2.55144e-34	5.76356e-32
CLSPN	2175.25	2.25811	0.185403	12.1794	3.99984e-34	8.91808e-32
PCK2	7105.95	-2.70372	0.22201	-12.1784	4.05294e-34	8.92063e-32
KRT17	9433.45	5.73053	0.471175	12.1622	4.94002e-34	1.07355e-31
KIF23	2749.14	2.0916	0.172262	12.142	6.32835e-34	1.35806e-31
STIL	3140.59	2.2236	0.183293	12.1314	7.20258e-34	1.52659e-31
NFE2L3	7674.5	2.1532	0.177538	12.1281	7.4935e-34	1.56888e-31
SLC2A5	1645.79	-3.52958	0.291758	-12.0976	1.08717e-33	2.24222e-31
KHK	2269.84	-2.81076	0.232354	-12.0969	1.09708e-33	2.24222e-31
NOTCH3	26343.7	1.98674	0.164778	12.0571	1.77956e-33	3.59429e-31
FOXS1	738.382	2.89608	0.240966	12.0186	2.83638e-33	5.66221e-31
ALPP	414.658	6.94886	0.579744	11.9861	4.20328e-33	8.29448e-31
HOXC13	266.668	9.22062	0.772322	11.9388	7.42655e-33	1.44885e-30
SLC39A10	3249.93	1.80637	0.151476	11.9251	8.75577e-33	1.68898e-30
DMBX1	175.073	5.20955	0.438095	11.8914	1.31237e-32	2.50343e-30
ASAH2	269.611	-5.90876	0.497356	-11.8803	1.49765e-32	2.82547e-30
CLEC5A	362.431	3.22696	0.271693	11.8772	1.55421e-32	2.90029e-30
TRIM59	1371.53	1.65455	0.139417	11.8677	1.74223e-32	3.2162e-30
CBX2	1546.06	3.30279	0.278417	11.8627	1.84824e-32	3.37559e-30
FAM72A	127.649	2.61941	0.221431	11.8295	2.74843e-32	4.96685e-30
CDH3	4838.41	3.18411	0.269332	11.8222	2.99567e-32	5.35725e-30
SIDT2	8328.56	-1.41407	0.119634	-11.8199	3.08067e-32	5.45247e-30
HELLS	1680.86	2.01567	0.171133	11.7784	5.04571e-32	8.83926e-30
ASPM	4388.21	2.46669	0.209763	11.7594	6.31836e-32	1.09569e-29
PLEKHG4	2903.33	2.79518	0.237974	11.7457	7.42926e-32	1.27546e-29
GHRL	1405.85	-4.70916	0.401276	-11.7355	8.38638e-32	1.42552e-29
CRADD	782.939	-1.09843	0.0936093	-11.7342	8.50975e-32	1.43231e-29
GRIA4	69.8556	-3.62348	0.308977	-11.7273	9.23082e-32	1.53859e-29
CCDC150	205.416	2.52895	0.217033	11.6524	2.23135e-31	3.68345e-29
CAD	9918.98	1.30232	0.112183	11.6089	3.71447e-31	6.07333e-29
STX12	6244.77	-0.937399	0.0807723	-11.6055	3.86644e-31	6.26218e-29
AQP11	671.406	-2.35073	0.202762	-11.5936	4.44248e-31	7.09865e-29
POLQ	1471.51	2.39523	0.206608	11.5931	4.4656e-31	7.09865e-29
PTGR1	4191.61	-2.18646	0.188772	-11.5825	5.05327e-31	7.95914e-29
LCTL	261.633	1.47368	0.127875	11.5244	9.94039e-31	1.55142e-28
KIF18B	2787.41	2.4073	0.209064	11.5147	1.11243e-30	1.72056e-28
KIF26B	2424.13	2.59548	0.225787	11.4952	1.39394e-30	2.13671e-28
ADAMTS12	1735.66	2.82341	0.245644	11.4939	1.4155e-30	2.15056e-28
ZNF469	2700.6	2.60903	0.227596	11.4634	2.01435e-30	3.03354e-28
SAT2	2590.25	-1.53722	0.134201	-11.4546	2.22899e-30	3.3276e-28
KDM8	527.694	-1.401	0.122542	-11.4328	2.86696e-30	4.24309e-28
ZG16	970.784	-6.53411	0.571693	-11.4294	2.98143e-30	4.37481e-28
PRAME	1040.01	6.28793	0.550775	11.4165	3.4586e-30	5.03197e-28
IGFL2	161.155	5.03244	0.440845	11.4154	3.50152e-30	5.0516e-28
RECQL4	3698.79	2.25774	0.197877	11.4098	3.73494e-30	5.34346e-28
DSCC1	1219.18	1.86377	0.163822	11.3768	5.45556e-30	7.74059e-28
HADHB	10051.8	-1.01896	0.089602	-11.3721	5.75952e-30	8.10487e-28
BTD	2394.04	-1.36781	0.12053	-11.3484	7.5563e-30	1.05469e-27
ZWILCH	2633.61	1.38539	0.122219	11.3353	8.77321e-30	1.21467e-27
DCSTAMP	78.8913	3.97013	0.351448	11.2965	1.36562e-29	1.87559e-27
SULT1A1	2409.58	-2.62829	0.232784	-11.2907	1.45912e-29	1.98811e-27
BMP8A	2132.91	2.01447	0.178869	11.2623	2.01531e-29	2.72432e-27
ALDOB	36513.9	-5.55865	0.49389	-11.2548	2.19265e-29	2.94089e-27
RBP2	9032.34	-6.80149	0.604696	-11.2478	2.3748e-29	3.16051e-27
OLR1	1044.43	2.94793	0.262576	11.2269	3.00719e-29	3.97134e-27
COL7A1	3254.63	3.12077	0.278398	11.2098	3.65204e-29	4.78612e-27
THBS2	21445.6	2.96139	0.264293	11.205	3.85499e-29	5.01383e-27
TTC36	113.413	-3.0739	0.275112	-11.1733	5.51195e-29	7.11497e-27
USP31	2506.37	1.12593	0.100805	11.1695	5.7524e-29	7.36994e-27
FANCB	243.039	1.95473	0.17514	11.161	6.32943e-29	8.04916e-27
CENPO	3722.31	1.05994	0.0950108	11.156	6.69209e-29	8.44778e-27
ACE	12727.7	-2.50857	0.224927	-11.1528	6.94014e-29	8.69696e-27
ARHGAP11A	3830.95	1.93969	0.174095	11.1415	7.87463e-29	9.79649e-27
CDC7	1131.18	1.84385	0.165648	11.1312	8.84741e-29	1.09275e-26
FANCI	5368.82	1.50394	0.135232	11.1212	9.89421e-29	1.21331e-26
CENPE	3103.73	2.20318	0.198704	11.0877	1.43883e-28	1.7519e-26
RASAL2	5757.73	1.2166	0.109778	11.0823	1.52808e-28	1.84747e-26
IL11	623.842	4.48399	0.404918	11.0738	1.68082e-28	2.01793e-26
WDR62	1832.37	2.22608	0.201061	11.0717	1.72089e-28	2.03753e-26
OXTR	335.096	2.85217	0.2576	11.0721	1.71315e-28	2.03753e-26
NEB	2733.62	4.50949	0.407958	11.0538	2.10114e-28	2.47071e-26
TOP2A	20463.5	2.53584	0.229728	11.0385	2.49278e-28	2.9113e-26
MAPK15	337.48	3.20935	0.291017	11.0281	2.79853e-28	3.24629e-26
C5orf46	56.2866	6.73135	0.611049	11.0161	3.19763e-28	3.68436e-26
PUS7	2767.3	1.72246	0.156382	11.0144	3.25586e-28	3.72644e-26
RNASE1	34582.6	-2.67564	0.242974	-11.012	3.3436e-28	3.80098e-26
C1QTNF6	2472.44	2.09285	0.190061	11.0115	3.36527e-28	3.80098e-26
CSRNP1	6969.39	-1.93441	0.176041	-10.9884	4.34389e-28	4.87424e-26
ESRRB	44.3741	-3.30124	0.300852	-10.973	5.1555e-28	5.74737e-26
WDHD1	1610.27	1.54989	0.141367	10.9636	5.71728e-28	6.33254e-26
HTRA4	82.9805	3.27047	0.298564	10.954	6.35653e-28	6.99544e-26
RBM28	2166.4	1.04877	0.0957841	10.9493	6.69885e-28	7.32522e-26
CLEC3B	2059.75	-3.02587	0.276445	-10.9456	6.97209e-28	7.57575e-26
MCM10	1284.57	2.32871	0.213358	10.9146	9.81867e-28	1.06017e-25
ARHGAP39	2515.81	1.77518	0.162699	10.9108	1.02321e-27	1.09791e-25
CENPI	544.45	1.7893	0.16413	10.9017	1.13075e-27	1.20576e-25
HOXC6	599.086	3.28843	0.30169	10.9	1.1522e-27	1.22105e-25
PRC1	5708.29	1.82389	0.16737	10.8973	1.18674e-27	1.24994e-25
CYP2D6	470.301	-3.43026	0.314803	-10.8965	1.19735e-27	1.25343e-25
SMC4	13256.2	1.45279	0.133335	10.8958	1.20718e-27	1.25605e-25
LZTS1	1596.79	2.20569	0.202541	10.8901	1.28543e-27	1.32941e-25
ETFDH	2547.44	-1.43084	0.131486	-10.8821	1.40363e-27	1.44297e-25
CILP2	741.35	4.07699	0.374913	10.8745	1.5249e-27	1.5583e-25
TREM2	1154.09	2.67711	0.246339	10.8676	1.64513e-27	1.67122e-25
KCNE2	1631.93	-5.02809	0.463156	-10.8561	1.86452e-27	1.88295e-25
PDCD11	6499.63	1.12024	0.10335	10.8393	2.24209e-27	2.25101e-25
ATP11A	16936.5	1.88824	0.174235	10.8373	2.29149e-27	2.28722e-25
TPX2	11009.6	2.22812	0.205742	10.8297	2.48976e-27	2.47077e-25
S100G	244.596	-6.07158	0.560799	-10.8267	2.57368e-27	2.53936e-25
MMS22L	1631.57	1.50956	0.139501	10.8211	2.73372e-27	2.68185e-25
DHRS7	6439.57	-1.54472	0.142831	-10.815	2.92146e-27	2.84975e-25
CENPL	1126.69	1.32581	0.122736	10.8022	3.36219e-27	3.26113e-25
ATP4B	10907.6	-7.61264	0.705057	-10.7972	3.54893e-27	3.42293e-25
ADAMTS14	1445.14	2.44659	0.226868	10.7842	4.08836e-27	3.92117e-25
EXO1	1326.25	2.15447	0.199896	10.778	4.37526e-27	4.17303e-25
CBFB	6383.32	1.20404	0.11174	10.7754	4.49966e-27	4.26796e-25
URB2	2477.44	1.34722	0.125179	10.7624	5.18191e-27	4.88808e-25
C1orf112	1338.14	1.2017	0.111669	10.7612	5.24654e-27	4.922e-25
GADD45B	5493.44	-2.25126	0.209417	-10.7501	5.91902e-27	5.5227e-25
HEATR1	10461.8	1.03466	0.0963437	10.7393	6.65569e-27	6.17648e-25
KIF18A	1259.24	2.05686	0.19176	10.7262	7.66629e-27	7.07607e-25
TXNDC5	45469.5	-1.39029	0.129635	-10.7246	7.80004e-27	7.16102e-25
TRIP13	2229.27	2.17028	0.202392	10.7232	7.92516e-27	7.23718e-25
CASP2	6105.54	1.13354	0.105848	10.7091	9.22324e-27	8.37802e-25
FAM91A1	8952.17	1.23205	0.115088	10.7052	9.61721e-27	8.68991e-25
SULT1A2	588.325	-3.65782	0.341814	-10.7012	1.00463e-26	9.03008e-25
ABCG2	1474.92	-3.31968	0.310261	-10.6996	1.02178e-26	9.13642e-25
ULBP2	270.824	3.6457	0.340778	10.6982	1.03809e-26	9.2342e-25
ZNF367	1777.23	1.61376	0.15089	10.695	1.07423e-26	9.50639e-25
TNNT1	261.091	4.88456	0.457715	10.6716	1.38221e-26	1.21691e-24
HIGD1A	12834.8	-1.12244	0.105214	-10.6682	1.43367e-26	1.25578e-24
ZER1	9342.44	-1.04254	0.0977627	-10.664	1.50021e-26	1.30739e-24
RAB27A	5530.74	-1.49015	0.139775	-10.6611	1.54833e-26	1.34252e-24
KRT23	2406.87	5.44416	0.51094	10.6552	1.64912e-26	1.42272e-24
CKAP2L	1356.22	2.00334	0.188295	10.6393	1.95519e-26	1.67834e-24
ENPP6	92.3944	-2.99345	0.281873	-10.6199	2.40932e-26	2.05787e-24
ACO2	22566.6	-1.12643	0.106074	-10.6193	2.42344e-26	2.05968e-24
E2F7	1241.96	2.48568	0.234111	10.6175	2.46976e-26	2.08871e-24
DNA2	1141.07	1.93835	0.182614	10.6145	2.55252e-26	2.14812e-24
PIGW	1084	1.31213	0.123684	10.6088	2.71328e-26	2.27227e-24
ADAMTS18	127.05	3.49146	0.329218	10.6053	2.81565e-26	2.34656e-24
RTKN2	1250.89	2.24768	0.211955	10.6045	2.83892e-26	2.35452e-24
MAGEA12	603.156	9.29435	0.877528	10.5915	3.26269e-26	2.69298e-24
SOX4	23024	1.84698	0.174481	10.5856	3.47728e-26	2.85636e-24
CCNDBP1	4051.2	-0.938692	0.0887147	-10.581	3.64936e-26	2.98344e-24
HMGA2	2435.4	4.1732	0.394826	10.5697	4.11661e-26	3.34948e-24
DTL	2695.64	1.9854	0.188385	10.5391	5.70593e-26	4.62072e-24
SLC25A20	2205.08	-1.47565	0.140057	-10.5361	5.89136e-26	4.74849e-24
NUF2	1626.45	2.1321	0.202493	10.5292	6.33437e-26	5.0817e-24
KCNJ13	192.955	-3.09273	0.293905	-10.5229	6.7751e-26	5.39089e-24
UCN2	52.1662	4.13432	0.392892	10.5228	6.78258e-26	5.39089e-24
RNFT2	781.894	1.99108	0.189239	10.5215	6.87692e-26	5.44069e-24
SPP1	19560.9	3.93985	0.374496	10.5204	6.95717e-26	5.47893e-24
BMP1	5697.37	1.48634	0.141364	10.5143	7.42483e-26	5.82053e-24
PABPC1L	1590.28	2.48396	0.236353	10.5095	7.8101e-26	6.09472e-24
C5orf34	405.938	1.66376	0.158354	10.5066	8.05498e-26	6.25737e-24
CSAG1	543.476	6.75967	0.644364	10.4905	9.55714e-26	7.39086e-24
KNTC1	3554.06	1.51342	0.14443	10.4785	1.08417e-25	8.34666e-24
SERPINB3	223.279	6.84117	0.653162	10.4739	1.13823e-25	8.72375e-24
PGM2L1	3130.66	1.56985	0.149953	10.469	1.19918e-25	9.14999e-24
NCOA4	29255.1	-0.914737	0.0873915	-10.4671	1.22305e-25	9.29084e-24
DKC1	8314.87	1.23956	0.118761	10.4374	1.67285e-25	1.26517e-23
KIF15	1488.12	1.94722	0.186916	10.4176	2.06078e-25	1.55173e-23
GINS4	1303.29	1.78673	0.171599	10.4123	2.17976e-25	1.63415e-23
SLC6A4	299.692	-4.95606	0.476712	-10.3963	2.5762e-25	1.91464e-23
ARC	583.237	-4.21476	0.4054	-10.3965	2.57083e-25	1.91464e-23
PRR7	1645.63	1.87606	0.180566	10.3899	2.75685e-25	2.04007e-23
HERPUD1	16535.3	-1.26795	0.122105	-10.3841	2.92776e-25	2.15156e-23
PGRMC2	9992.62	-0.969782	0.093392	-10.384	2.93258e-25	2.15156e-23
RRP12	4790.14	1.18366	0.11403	10.3803	3.04843e-25	2.22704e-23
HADH	7704.63	-1.28	0.123504	-10.3641	3.61232e-25	2.62781e-23
RFC3	3039.73	1.61631	0.155975	10.3626	3.66868e-25	2.64638e-23
POLR1B	3864.43	1.03359	0.0997397	10.3629	3.6585e-25	2.64638e-23
PLXNA1	12133.9	1.26043	0.121712	10.3559	3.93516e-25	2.82673e-23
RUNX1	13863.3	1.4235	0.137508	10.3521	4.09427e-25	2.92877e-23
NCAPG2	3450.51	1.49523	0.144503	10.3473	4.30295e-25	3.06527e-23
ARHGAP11B	198.703	1.72906	0.167218	10.3401	4.63898e-25	3.29099e-23
CKAP2	5275.9	1.69211	0.163881	10.3253	5.41744e-25	3.82743e-23
GCNT4	872.01	-3.02809	0.293443	-10.3192	5.77155e-25	4.0609e-23
APOC3	4427.59	-8.22531	0.797638	-10.3121	6.21354e-25	4.35404e-23
PRR11	4889.66	1.68918	0.163848	10.3094	6.38961e-25	4.45922e-23
NT5DC4	67.756	2.64986	0.257083	10.3074	6.52486e-25	4.53517e-23
MGAM	1776.17	-4.30124	0.417454	-10.3035	6.79297e-25	4.70248e-23
RBKS	839.779	-1.49923	0.145537	-10.3013	6.94886e-25	4.79108e-23
CHRNA1	138.525	3.07287	0.298414	10.2974	7.24233e-25	4.97345e-23
HOXC11	590.05	4.28986	0.416674	10.2955	7.3851e-25	5.05129e-23
KIF11	5189.68	1.75468	0.170465	10.2935	7.53882e-25	5.13597e-23
FGF19	134.911	6.81647	0.662881	10.2831	8.39765e-25	5.69845e-23
KIF20A	2966.78	1.93984	0.18891	10.2686	9.7614e-25	6.59778e-23
KIF20B	3552.83	1.42565	0.138962	10.2592	1.07554e-24	7.24116e-23
SLC23A1	364.398	-3.49785	0.341047	-10.2562	1.1096e-24	7.44127e-23
COL5A2	24495.4	1.97146	0.192278	10.2532	1.14518e-24	7.64996e-23
CST2	734.87	3.68189	0.359258	10.2486	1.20076e-24	7.99019e-23
DPT	3145.21	-3.64238	0.355416	-10.2482	1.20564e-24	7.99169e-23
LCT	951.652	-6.17454	0.602997	-10.2397	1.31584e-24	8.68861e-23
MTTP	5173.32	-5.43671	0.531479	-10.2294	1.46433e-24	9.63203e-23
CHAD	205.313	-2.9297	0.286505	-10.2256	1.52231e-24	9.97517e-23
ZNF695	407.911	2.3257	0.227518	10.222	1.58014e-24	1.03148e-22
TARBP1	3584.59	1.26532	0.123791	10.2214	1.5904e-24	1.03424e-22
CKM	129.184	-3.77471	0.369318	-10.2208	1.6008e-24	1.03708e-22
MAGEA3	1088.54	9.84835	0.96378	10.2185	1.63923e-24	1.05798e-22
KLK10	6140.43	4.60216	0.450844	10.2079	1.82852e-24	1.17573e-22
TNFRSF17	471.874	-3.44376	0.337406	-10.2066	1.8526e-24	1.18677e-22
BUB1	3819.56	1.98346	0.194739	10.1852	2.30799e-24	1.473e-22
ETV4	4580.06	2.71598	0.266788	10.1803	2.42855e-24	1.53285e-22
HPGD	9255.74	-3.10031	0.304523	-10.1809	2.41324e-24	1.53285e-22
ENC1	15725.4	1.84027	0.180764	10.1805	2.42319e-24	1.53285e-22
FAM72B	214.511	2.14833	0.211087	10.1775	2.499e-24	1.57153e-22
FAM72D	163.595	2.40286	0.236189	10.1735	2.60463e-24	1.63198e-22
GNMT	59.0166	-2.43013	0.239019	-10.1671	2.78057e-24	1.73588e-22
RIPK2	3143.86	1.2193	0.119983	10.1622	2.92283e-24	1.81809e-22
HAPLN4	1223.37	-3.88957	0.38319	-10.1505	3.29702e-24	2.04344e-22
BRIP1	1168.75	1.80811	0.17821	10.1459	3.45549e-24	2.13395e-22
GAL3ST2	397.431	4.47086	0.440971	10.1387	3.72124e-24	2.28983e-22
GINS1	2314.59	1.94764	0.192204	10.1332	3.93541e-24	2.41297e-22
NAA25	3659.8	1.0344	0.10213	10.1282	4.14105e-24	2.53002e-22
RAD54L	1247.07	1.65963	0.163963	10.1219	4.41556e-24	2.68817e-22
CYP3A4	3058.99	-5.69181	0.562364	-10.1212	4.4478e-24	2.68873e-22
UNC5D	66.135	-4.22092	0.417036	-10.1212	4.44764e-24	2.68873e-22
LIF	2783.08	2.11279	0.209014	10.1083	5.07417e-24	3.05661e-22
RFWD3	5070.61	1.15685	0.114472	10.106	5.19639e-24	3.11928e-22
FANCD2	2164.75	1.66248	0.16467	10.0958	5.76301e-24	3.44737e-22
TM6SF2	1830.16	-4.13871	0.410096	-10.0921	5.99034e-24	3.57091e-22
IGF2BP1	1034.85	6.13958	0.608504	10.0896	6.13985e-24	3.64073e-22
IER5L	6105.26	1.89771	0.188088	10.0895	6.14989e-24	3.64073e-22
RAD54B	1033.7	1.57199	0.156003	10.0766	7.00783e-24	4.13438e-22
GEN1	2079.55	1.42742	0.141739	10.0708	7.44053e-24	4.37462e-22
KIF4A	2525.13	1.92222	0.19107	10.0603	8.27461e-24	4.84841e-22
HOXA9	627.68	4.20703	0.418291	10.0577	8.49809e-24	4.96242e-22
TEAD4	2904.39	1.60101	0.159298	10.0504	9.15089e-24	5.32551e-22
UTP20	4035.09	1.13917	0.113419	10.0439	9.77394e-24	5.66889e-22
ATP4A	13702.1	-7.6249	0.759261	-10.0425	9.91059e-24	5.72879e-22
SLC5A5	2705.4	-5.22166	0.519985	-10.0419	9.97e-24	5.74379e-22
PLK4	1416.42	1.63311	0.162936	10.023	1.20725e-23	6.93178e-22
DDX21	14964	1.24604	0.12438	10.018	1.27099e-23	7.27347e-22
FNDC1	8772.74	3.22768	0.322244	10.0163	1.29298e-23	7.37473e-22
CORIN	392.843	2.65292	0.264973	10.012	1.3497e-23	7.67272e-22
PADI1	129.072	5.52869	0.552289	10.0105	1.37046e-23	7.76503e-22
NDC80	1546.79	1.72283	0.172219	10.0037	1.46783e-23	8.28935e-22
PRIM2	1498.8	1.01641	0.10163	10.001	1.5079e-23	8.48773e-22
SLCO1B3	666.476	6.36864	0.63732	9.99286	1.63793e-23	9.18852e-22
HRH2	321.484	-2.22007	0.222173	-9.99254	1.6431e-23	9.18852e-22
WDR43	5829.35	0.932835	0.0933946	9.9881	1.71837e-23	9.57826e-22
B3GAT1	270.336	-3.00679	0.301116	-9.98548	1.76442e-23	9.80307e-22
SCNN1B	620.752	-3.9198	0.393228	-9.96828	2.09835e-23	1.16208e-21
P4HA3	427.853	2.39695	0.240748	9.95626	2.36815e-23	1.30458e-21
UBE2J1	13993.6	-0.93144	0.0935543	-9.95614	2.37086e-23	1.30458e-21
SLC5A11	78.6806	-3.85699	0.387571	-9.9517	2.47917e-23	1.35982e-21
TOPBP1	5887.96	1.06118	0.106648	9.95028	2.51482e-23	1.37498e-21
PXMP2	2159.67	-1.54694	0.155554	-9.94474	2.65871e-23	1.44904e-21
PKMYT1	4111.82	1.91292	0.192453	9.93964	2.79842e-23	1.52036e-21
BRCA2	1967.27	1.76819	0.177911	9.9386	2.82777e-23	1.53146e-21
CHIA	520.082	-8.7045	0.876638	-9.92941	3.1009e-23	1.67409e-21
NOX1	925.782	4.48224	0.451462	9.92828	3.1362e-23	1.68785e-21
UHRF1	2368.88	2.01614	0.203232	9.92041	3.39357e-23	1.82065e-21
BUB1B	2596.74	1.962	0.197966	9.91077	3.7377e-23	1.99903e-21
CYB5A	6294.99	-1.39286	0.140585	-9.90756	3.85958e-23	2.0578e-21
PPAT	2068.98	1.36485	0.137881	9.89872	4.21623e-23	2.241e-21
ATR	3855.83	1.14117	0.115448	9.88467	4.8516e-23	2.57075e-21
NUDCD1	2678.96	1.25062	0.126534	9.88363	4.90231e-23	2.58963e-21
OSGIN1	1077.57	-2.16349	0.218959	-9.88081	5.04226e-23	2.65538e-21
MSH2	3417.58	1.17343	0.118843	9.87378	5.40862e-23	2.83961e-21
ACBD4	1338.57	-1.20785	0.122366	-9.87087	5.56807e-23	2.91441e-21
PEPD	9824.61	-1.58005	0.1601	-9.86918	5.6625e-23	2.95482e-21
TGIF1	7979.29	1.07404	0.108898	9.86279	6.03499e-23	3.13966e-21
CHEK1	2449.42	1.44825	0.146851	9.86208	6.07789e-23	3.15243e-21
SLC25A4	4942.26	-1.9958	0.202495	-9.85605	6.45397e-23	3.3374e-21
C16orf89	1374.33	-3.85395	0.391222	-9.85104	6.78381e-23	3.49743e-21
TRIM29	9542.64	3.97962	0.404502	9.83833	7.6979e-23	3.945e-21
APOB	24199.7	-6.12728	0.622781	-9.83858	7.67841e-23	3.945e-21
TIMELESS	4623.23	1.50323	0.152832	9.83587	7.88844e-23	4.03062e-21
TRIM40	270.305	-3.57845	0.363913	-9.83327	8.09471e-23	4.12374e-21
GSDMC	65.4142	3.37625	0.343476	9.82966	8.39037e-23	4.26171e-21
GTPBP4	5824.28	1.06887	0.108888	9.81616	9.59316e-23	4.85827e-21
IQGAP3	6989.55	1.98379	0.202155	9.81323	9.87591e-23	4.98675e-21
FEZF1	283.506	5.12318	0.522376	9.80746	1.04568e-22	5.26458e-21
SFRP4	12988.9	3.55206	0.362603	9.796	1.17129e-22	5.87972e-21
GDF15	10093.3	2.60462	0.265945	9.79382	1.19689e-22	5.99074e-21
DBF4	2050.38	1.39718	0.142676	9.79268	1.21044e-22	6.04092e-21
RDH12	350.745	-3.673	0.375175	-9.79011	1.24159e-22	6.17844e-21
APOA4	25462.7	-7.9121	0.808222	-9.78951	1.24895e-22	6.19708e-21
CSE1L	15825.8	1.22168	0.124813	9.78806	1.26707e-22	6.26892e-21
COMP	2193.57	4.03071	0.412089	9.78116	1.35647e-22	6.69192e-21
RDH5	4771.93	-1.19303	0.122081	-9.7724	1.47912e-22	7.2761e-21
SLC7A8	6902.98	-2.02454	0.207191	-9.77137	1.49415e-22	7.32901e-21
DCLRE1B	1560.22	0.992116	0.101609	9.76406	1.60598e-22	7.83278e-21
PRKDC	31614.3	1.29729	0.132863	9.7641	1.60531e-22	7.83278e-21
NOP2	5517.93	1.21015	0.124007	9.75873	1.69266e-22	8.23217e-21
MASTL	2041.32	1.13015	0.115831	9.75689	1.72355e-22	8.35871e-21
MSR1	3186.11	2.02402	0.20766	9.74683	1.90322e-22	9.2041e-21
ORC6	952.379	1.83732	0.188642	9.73974	2.04079e-22	9.84166e-21
DHRS11	4604.4	-2.50911	0.257644	-9.73867	2.06243e-22	9.91815e-21
C11orf86	1352.9	-5.09554	0.523327	-9.73682	2.10014e-22	1.00713e-20
SLC4A11	1928.63	2.72091	0.279457	9.73644	2.10811e-22	1.00813e-20
HEBP1	4152.22	-1.59296	0.163798	-9.72515	2.35564e-22	1.12338e-20
MKI67	25771.9	1.99276	0.204973	9.72208	2.42775e-22	1.15456e-20
MEX3A	1285.08	2.7771	0.285796	9.7171	2.54946e-22	1.20909e-20
STK31	487.579	3.50104	0.360353	9.71558	2.58764e-22	1.22382e-20
GBA3	1102.96	-5.20262	0.535682	-9.71213	2.67679e-22	1.26251e-20
SPDYC	94.2588	4.92103	0.506769	9.7106	2.71735e-22	1.27812e-20
SDS	1435.56	2.42167	0.249809	9.69408	3.19489e-22	1.49863e-20
KCNJ14	277.33	1.60555	0.16567	9.69128	3.28372e-22	1.5361e-20
HADHA	22455.2	-0.963401	0.0994143	-9.69077	3.30019e-22	1.53961e-20
SERPINH1	25777.5	1.39118	0.143801	9.67435	3.8754e-22	1.80306e-20
RAD51AP1	1404.98	1.71936	0.177815	9.66935	4.0695e-22	1.88825e-20
FIGNL1	1864.1	1.29081	0.133558	9.66481	4.25415e-22	1.96861e-20
MPZ	344.465	-2.48522	0.257167	-9.66385	4.29431e-22	1.98185e-20
LMNB2	13682.4	1.33135	0.137779	9.6629	4.33404e-22	1.99482e-20
MCM4	13675.7	1.61935	0.167607	9.66157	4.39075e-22	2.01552e-20
CRYL1	5162.1	-1.76579	0.182798	-9.65979	4.46764e-22	2.04534e-20
CYSTM1	46643.4	-2.2893	0.237062	-9.65696	4.59285e-22	2.09707e-20
PALB2	1958.25	0.931889	0.0965045	9.65643	4.61688e-22	2.10246e-20
AGRN	40411	1.52529	0.157989	9.6544	4.70926e-22	2.13885e-20
SLC46A1	5404.06	-1.62568	0.168443	-9.65124	4.85634e-22	2.19983e-20
ACY1	8850.32	-1.87647	0.195124	-9.61681	6.79032e-22	3.0678e-20
CCT6A	19231.5	0.971767	0.101052	9.61649	6.81181e-22	3.06943e-20
NAT10	7386.22	0.925789	0.096307	9.6129	7.05346e-22	3.17e-20
GUCA2B	241.429	-5.41787	0.564053	-9.60526	7.59643e-22	3.4051e-20
S100A7	323.046	7.76404	0.808447	9.60364	7.71669e-22	3.44104e-20
C17orf53	722.618	1.57676	0.164179	9.60387	7.70003e-22	3.44104e-20
KIF2C	3252.83	1.80243	0.187786	9.59831	8.12632e-22	3.61432e-20
SLC2A2	305.567	-5.66345	0.590529	-9.59048	8.76799e-22	3.88964e-20
ANKRD9	3232.86	-1.32685	0.138388	-9.58791	8.98915e-22	3.97747e-20
HOXA10	2055.58	3.57507	0.372893	9.58737	9.03555e-22	3.98772e-20
DHDH	281.028	-3.0395	0.317048	-9.58687	9.07967e-22	3.99692e-20
LSG1	5245.14	0.866679	0.0904059	9.58653	9.10997e-22	4e-20
PARPBP	1451.04	1.61115	0.168107	9.58408	9.3288e-22	4.08564e-20
HBB	5454.26	-3.37264	0.352187	-9.57629	1.00593e-21	4.39435e-20
CITED2	6866.89	-1.53452	0.160425	-9.56535	1.11824e-21	4.87257e-20
POP1	1110.05	1.28025	0.133861	9.56405	1.13236e-21	4.92159e-20
HOXC12	92.2747	9.86809	1.03192	9.56287	1.14538e-21	4.96564e-20
DERL3	4939.72	-2.82007	0.295064	-9.55748	1.20664e-21	5.21805e-20
GPM6B	1037.29	-2.71797	0.284605	-9.54995	1.29757e-21	5.59714e-20
MDFI	2443.41	1.98581	0.207949	9.54955	1.30266e-21	5.60503e-20
RAP1A	9447.51	-1.15789	0.121262	-9.54866	1.31391e-21	5.63929e-20
KCNMB2	67.9999	-2.8226	0.295824	-9.54148	1.40808e-21	6.0284e-20
MAGEA6	796.23	9.68349	1.01513	9.5392	1.43945e-21	6.14738e-20
JAG2	3513.76	1.63281	0.171229	9.5358	1.4874e-21	6.33639e-20
DNMT1	11047	1.24826	0.130947	9.53258	1.53417e-21	6.51948e-20
ACAA1	5115.26	-1.22241	0.128326	-9.52579	1.63798e-21	6.94344e-20
TMED6	321.404	-2.70135	0.283606	-9.52501	1.65029e-21	6.97836e-20
HORMAD1	141.22	4.99808	0.524814	9.52353	1.67394e-21	7.06098e-20
BRCA1	3277.48	1.33253	0.140071	9.51325	1.84789e-21	7.77562e-20
APLN	1152.15	2.93587	0.308852	9.50573	1.98655e-21	8.33865e-20
CEP55	3620.64	1.85853	0.195866	9.48882	2.33669e-21	9.78447e-20
CDH24	1291.68	1.34336	0.141622	9.48554	2.4113e-21	1.00723e-19
TCOF1	10861.8	1.00846	0.106325	9.48466	2.43177e-21	1.01332e-19
HMGB3	4927.69	1.73355	0.18279	9.48385	2.45079e-21	1.01877e-19
COX6B2	171.052	3.54596	0.37391	9.48347	2.4596e-21	1.01996e-19
SKA3	2185.79	1.96405	0.207214	9.47837	2.58285e-21	1.06849e-19
E2F1	2776.59	1.67855	0.177173	9.47404	2.69234e-21	1.11111e-19
CDCA2	1590.54	2.1071	0.222619	9.46506	2.93391e-21	1.2079e-19
SRGAP2	3944.45	0.932345	0.0985124	9.46425	2.95686e-21	1.21443e-19
GJA3	176.617	3.90006	0.412184	9.46193	3.02317e-21	1.23871e-19
DHX34	4235.11	1.13965	0.120459	9.46095	3.05149e-21	1.24733e-19
APOA1	17788.6	-5.8147	0.614645	-9.46026	3.07164e-21	1.25259e-19
KAZALD1	565.101	-2.03854	0.215919	-9.44124	3.68391e-21	1.49218e-19
ZNF511	12972.4	-2.44787	0.259276	-9.4412	3.68526e-21	1.49218e-19
ZNF267	2062.84	0.945165	0.100109	9.44135	3.68014e-21	1.49218e-19
FOXM1	9640.11	1.95526	0.207146	9.43907	3.76089e-21	1.51922e-19
NOX4	394.219	2.04796	0.217044	9.43567	3.88501e-21	1.56568e-19
COL3A1	279988	2.20893	0.234275	9.42877	4.14933e-21	1.66828e-19
PMCH	240.256	1.75455	0.186148	9.42561	4.27609e-21	1.71523e-19
POTEF	76.2979	5.30883	0.563487	9.4214	4.4513e-21	1.78135e-19
COL1A2	244652	2.13368	0.226535	9.41875	4.56487e-21	1.82255e-19
GDPD2	494.624	-3.55059	0.377335	-9.40966	4.97741e-21	1.98265e-19
XPO1	19436.1	0.813385	0.0864549	9.4082	5.04718e-21	2.00115e-19
ANGPT2	1565.23	1.66788	0.177276	9.40842	5.03662e-21	2.00115e-19
SP8	101.809	6.13338	0.6522	9.40414	5.24565e-21	2.07505e-19
GNA11	8361.41	-1.13608	0.120809	-9.40389	5.25827e-21	2.07526e-19
ACY3	3248.01	-3.00714	0.319841	-9.40198	5.3544e-21	2.10836e-19
CCNF	3158.09	1.64872	0.175371	9.40132	5.38824e-21	2.11683e-19
PAQR4	5694.63	1.61581	0.171924	9.39839	5.54041e-21	2.16669e-19
BIRC7	92.1431	3.64081	0.387382	9.3985	5.53474e-21	2.16669e-19
ABCG5	371.728	-3.67458	0.391119	-9.39503	5.7201e-21	2.23188e-19
AMH	382.952	3.13006	0.333196	9.39404	5.77393e-21	2.24777e-19
RBL1	1810.94	1.29918	0.138304	9.39367	5.79458e-21	2.25071e-19
ALDH6A1	2663.19	-1.26481	0.134775	-9.3846	6.31543e-21	2.44748e-19
DCLK3	83.3632	2.05121	0.218743	9.37722	6.77372e-21	2.61917e-19
CTRC	16.4383	-3.79664	0.404895	-9.37685	6.7974e-21	2.62078e-19
SNX10	2562.67	1.63727	0.174611	9.37668	6.8084e-21	2.62078e-19
OLFML2B	6228.66	2.12343	0.22653	9.37373	7.00132e-21	2.68901e-19
REP15	657.767	-3.26588	0.34862	-9.36803	7.38983e-21	2.83189e-19
TNS4	19639.4	4.16013	0.444152	9.36645	7.5012e-21	2.86817e-19
NXPH4	561.06	3.39296	0.362678	9.35532	8.33487e-21	3.17984e-19
ADCY3	6253.27	0.981199	0.104997	9.34499	9.18963e-21	3.49817e-19
FBP2	386.009	-3.38283	0.362094	-9.34241	9.41669e-21	3.57668e-19
LEMD1	171.189	4.31799	0.462246	9.34133	9.51349e-21	3.60547e-19
ENTPD5	2527.45	-1.55113	0.166056	-9.34101	9.54234e-21	3.60843e-19
PKD2L1	50.492	2.78113	0.297853	9.33726	9.88619e-21	3.73024e-19
CIT	3419.13	1.30592	0.139963	9.33041	1.05458e-20	3.97042e-19
TROAP	2308.01	1.95676	0.209768	9.32821	1.07678e-20	4.0451e-19
CREB3L3	4331.86	-4.45573	0.478318	-9.31542	1.21475e-20	4.55344e-19
HOXA11	628.19	4.25249	0.45711	9.30299	1.36554e-20	5.10752e-19
CKAP5	15434.9	0.931198	0.100197	9.29364	1.49102e-20	5.56475e-19
MUC16	1425.1	4.86755	0.523837	9.29211	1.51264e-20	5.63318e-19
MEST	6877.65	2.03548	0.219112	9.2897	1.54729e-20	5.74975e-19
MRO	165.098	-2.25526	0.242854	-9.2865	1.59443e-20	5.90272e-19
GGN	154.662	-1.8764	0.202058	-9.28644	1.59533e-20	5.90272e-19
KLF4	13178.4	-1.80943	0.194916	-9.28313	1.64567e-20	6.0759e-19
CDCA5	2945.56	1.84016	0.198472	9.27162	1.83348e-20	6.74029e-19
TONSL	4695.73	1.5583	0.16807	9.27171	1.83187e-20	6.74029e-19
CDK1	5057.5	1.84673	0.199204	9.27058	1.85145e-20	6.7918e-19
FCGR1A	365.402	2.16046	0.233073	9.26947	1.8707e-20	6.8478e-19
MEI1	652.156	-2.32971	0.251379	-9.26773	1.90152e-20	6.9458e-19
SPRR1B	369.495	5.98078	0.646197	9.25535	2.13522e-20	7.7829e-19
ABCE1	8415.4	0.956848	0.103448	9.24959	2.25354e-20	8.19676e-19
OSBPL3	6103.01	1.35259	0.146256	9.24809	2.28548e-20	8.29536e-19
MCM8	2517.23	1.37361	0.148614	9.24284	2.40035e-20	8.69392e-19
EPYC	123.013	5.24025	0.567454	9.23466	2.59118e-20	9.36534e-19
SPAG5	4799.77	1.47358	0.159636	9.23088	2.6841e-20	9.68082e-19
PODNL1	895.253	2.1274	0.230693	9.2218	2.92162e-20	1.05154e-18
NAT8B	349.339	-3.95327	0.428824	-9.21886	3.00282e-20	1.0785e-18
KREMEN2	245.784	2.69483	0.292364	9.21738	3.0446e-20	1.09122e-18
MT1M	750.599	-3.17437	0.344569	-9.21257	3.18397e-20	1.1388e-18
C4BPA	498.859	4.1237	0.447642	9.21206	3.19915e-20	1.14185e-18
TTK	2037.75	1.96041	0.212876	9.20916	3.28673e-20	1.17068e-18
SUV39H2	1427.84	1.08788	0.118234	9.20109	3.54336e-20	1.25845e-18
ACE2	4794.86	-4.00665	0.435461	-9.20096	3.54781e-20	1.25845e-18
ENHO	97.9209	-2.8491	0.309921	-9.19301	3.82011e-20	1.35224e-18
TNFSF11	326.23	2.4295	0.264458	9.18672	4.04985e-20	1.43061e-18
TFAP2A	2624.97	2.54811	0.277556	9.18055	4.28912e-20	1.51203e-18
SAR1B	7751.67	-0.947752	0.103271	-9.17729	4.42083e-20	1.55526e-18
NNAT	699.621	-2.98998	0.326007	-9.17151	4.66446e-20	1.63762e-18
YEATS2	6006.38	0.823706	0.0898214	9.17048	4.70912e-20	1.64992e-18
PLCD4	745.083	-2.03789	0.22237	-9.16441	4.98208e-20	1.742e-18
TOP1MT	3437.55	1.24804	0.136229	9.16134	5.12563e-20	1.78855e-18
TMEM201	3781.95	1.1318	0.123546	9.16091	5.14639e-20	1.79141e-18
DLX4	134.009	3.15289	0.344175	9.16073	5.1547e-20	1.79141e-18
S100A2	289.988	2.58833	0.282972	9.14694	5.85702e-20	2.03138e-18
ULBP1	100.767	3.3619	0.367664	9.14396	6.02049e-20	2.08387e-18
MYO1B	8476.65	1.3172	0.144102	9.14074	6.20245e-20	2.14253e-18
AMPD1	185.9	-3.47958	0.380869	-9.13589	6.48731e-20	2.23643e-18
PNPT1	3699.83	0.969029	0.106152	9.12868	6.93389e-20	2.38559e-18
KRT6A	1015.93	5.30871	0.58166	9.12683	7.05376e-20	2.42198e-18
XPO5	7771.75	1.35149	0.148126	9.12389	7.24755e-20	2.48355e-18
NCAPD3	5178.95	1.26092	0.138244	9.12098	7.44486e-20	2.54608e-18
ZBTB33	4602.55	0.901418	0.0988584	9.11827	7.63334e-20	2.60535e-18
CPXM1	2507.69	2.49042	0.273302	9.11234	8.06272e-20	2.74644e-18
ERCC6L	735.021	1.7516	0.192286	9.10936	8.28714e-20	2.8173e-18
PODXL	12677.2	1.35506	0.148966	9.09643	9.33494e-20	3.16724e-18
TTYH3	29076	1.6021	0.176144	9.09542	9.42222e-20	3.19054e-18
BMS1	5650.56	0.718987	0.0791147	9.08791	1.00962e-19	3.41205e-18
RAB30	839.692	-1.7282	0.190554	-9.06935	1.19729e-19	4.03833e-18
MFAP2	2302.29	2.30994	0.255058	9.05654	1.34656e-19	4.53288e-18
MCM2	7595.07	1.53834	0.169981	9.05008	1.42869e-19	4.79997e-18
EZH2	2621.01	1.53425	0.169567	9.04806	1.45524e-19	4.87961e-18
RAET1L	57.4439	4.42632	0.489256	9.04705	1.46882e-19	4.91553e-18
DNAAF3	257.917	2.63939	0.29183	9.04427	1.50675e-19	5.03265e-18
CTRB1	20.5527	-5.54743	0.613963	-9.03545	1.6333e-19	5.44474e-18
MYL6	67340.1	-1.37978	0.152711	-9.03521	1.63686e-19	5.44605e-18
GLRA4	29.2247	-4.25073	0.470628	-9.03202	1.68526e-19	5.59623e-18
PUS1	2476.74	1.07164	0.118666	9.03075	1.70506e-19	5.65104e-18
MGST3	12898.1	-1.3471	0.149286	-9.02363	1.8196e-19	6.01904e-18
CKMT2	329.83	-3.10111	0.343769	-9.02089	1.86568e-19	6.15961e-18
NEK2	2355.4	2.00426	0.222398	9.01204	2.02263e-19	6.66496e-18
B3GNT4	98.1416	2.63418	0.292318	9.01137	2.03496e-19	6.69275e-18
GTSE1	2204.54	1.79951	0.199819	9.00572	2.14258e-19	7.03323e-18
SKA1	1141.79	1.84698	0.205221	8.99995	2.25821e-19	7.39865e-18
TFAP4	2323.99	1.00495	0.111714	8.99577	2.34581e-19	7.67102e-18
MMP13	192.597	3.96643	0.440933	8.99553	2.35089e-19	7.67302e-18
PM20D1	87.7029	-2.67684	0.29787	-8.9866	2.55006e-19	8.3073e-18
LYVE1	1098.56	-2.71551	0.302447	-8.97847	2.74547e-19	8.92695e-18
SPHK1	2001.74	1.80554	0.201203	8.97372	2.86674e-19	9.30361e-18
ACADS	4913.84	-1.53234	0.170783	-8.97244	2.90021e-19	9.39449e-18
CELA2B	25.5083	-1.51735	0.169215	-8.96699	3.04727e-19	9.85226e-18
MAD2L1	2701.17	1.64506	0.183476	8.96609	3.0722e-19	9.9142e-18
F2R	10114.5	1.48173	0.165275	8.96526	3.0955e-19	9.97064e-18
CREG2	154.026	3.50051	0.39068	8.96005	3.24527e-19	1.04335e-17
ELFN2	601.968	3.56481	0.397919	8.95863	3.28735e-19	1.0549e-17
NCAPG	2996.38	1.46892	0.164231	8.94422	3.74575e-19	1.19976e-17
POLR1A	6841.66	0.985446	0.110196	8.94263	3.80022e-19	1.21494e-17
SERTAD1	2193.58	-1.29812	0.145172	-8.94195	3.82361e-19	1.22014e-17
MATN3	789.697	2.73614	0.306077	8.93937	3.9139e-19	1.24664e-17
ROGDI	2504.39	-1.11299	0.124655	-8.92854	4.31652e-19	1.37233e-17
SMC2	5026.43	1.1586	0.129889	8.91996	4.66457e-19	1.48025e-17
ILDR1	1216.01	2.17759	0.24437	8.91104	5.0556e-19	1.60138e-17
ATF4	26067.2	-0.792524	0.0890086	-8.90391	5.39143e-19	1.7046e-17
CHTF18	2082.05	1.41386	0.158822	8.90217	5.47675e-19	1.72591e-17
FOSB	15759.4	-3.10202	0.348459	-8.90212	5.47892e-19	1.72591e-17
EPHB4	15127.8	1.24807	0.140324	8.89424	5.88186e-19	1.84945e-17
TMEM26	300.268	1.60644	0.180793	8.88553	6.36142e-19	1.99517e-17
DHX37	4104.81	0.968181	0.108963	8.88541	6.36854e-19	1.99517e-17
CCDC13	63.824	-1.51909	0.171027	-8.88219	6.5559e-19	2.04811e-17
MOCS2	3303.78	-0.865113	0.0973997	-8.88209	6.5614e-19	2.04811e-17
S100B	566.201	-2.41308	0.271933	-8.87377	7.07078e-19	2.20311e-17
PLA2G1B	42.4713	-3.66269	0.41287	-8.87128	7.23073e-19	2.24886e-17
CCKBR	365.115	-4.61358	0.520142	-8.86986	7.32401e-19	2.27376e-17
C3orf18	570.82	-1.56621	0.176588	-8.8693	7.36098e-19	2.28111e-17
KAT2A	7031.92	1.06595	0.120225	8.86636	7.55738e-19	2.33775e-17
KLF2	13587.2	-1.81196	0.204421	-8.86384	7.73061e-19	2.38704e-17
WDR4	1458.71	1.0671	0.120469	8.85787	8.15606e-19	2.51388e-17
YPEL5	7027.37	-0.937641	0.105934	-8.85115	8.6619e-19	2.66501e-17
GKN1	163404	-6.8592	0.775301	-8.84714	8.97888e-19	2.75759e-17
GSN	69180.2	-1.69393	0.191529	-8.84427	9.21298e-19	2.82444e-17
INPP5A	4539.24	-1.21354	0.137288	-8.83937	9.62611e-19	2.94583e-17
LGALS9C	764.877	-4.02786	0.45577	-8.8375	9.78869e-19	2.99025e-17
SRSF5	12826.8	-0.834735	0.0945383	-8.82959	1.05057e-18	3.20357e-17
NOC3L	2233.9	0.93975	0.106436	8.82922	1.05408e-18	3.2086e-17
PLAU	8034.72	1.84195	0.208645	8.82817	1.06403e-18	3.22773e-17
FABP2	3405.08	-5.44528	0.616808	-8.82816	1.06413e-18	3.22773e-17
MMP7	14124.8	4.06565	0.461066	8.81794	1.16582e-18	3.52996e-17
KLF10	13170.6	-1.30216	0.147731	-8.81436	1.20373e-18	3.63833e-17
TMEM120A	4066.02	-1.24995	0.141919	-8.80751	1.27955e-18	3.86069e-17
HJURP	2065.05	1.90404	0.216194	8.80713	1.28396e-18	3.8672e-17
CFD	7037.95	-2.59786	0.295065	-8.80436	1.31606e-18	3.95695e-17
CALM1	57266.5	-0.933775	0.106066	-8.80375	1.32318e-18	3.9714e-17
ACBD7	516.702	2.53413	0.287945	8.80074	1.35913e-18	4.07217e-17
PRADC1	1583.19	-1.19528	0.135827	-8.80005	1.36755e-18	4.08314e-17
SUCLG1	9316.93	-1.09874	0.124855	-8.8001	1.3669e-18	4.08314e-17
LEFTY1	1144.56	4.83309	0.549377	8.79739	1.40033e-18	4.17377e-17
WDR75	4537.88	0.773816	0.0879707	8.79629	1.4141e-18	4.2075e-17
ANKRD18B	97.4472	5.17603	0.588492	8.79542	1.42518e-18	4.23314e-17
PAICS	13858.7	1.13214	0.128748	8.79347	1.45011e-18	4.29973e-17
NKRF	1694.83	0.948284	0.107871	8.79087	1.48406e-18	4.39282e-17
PADI3	71.7442	4.59629	0.523262	8.78391	1.57887e-18	4.66542e-17
TEF	2631.53	-1.50279	0.171314	-8.77211	1.75357e-18	5.17272e-17
XIRP1	135.451	3.19539	0.364333	8.77052	1.77837e-18	5.23689e-17
NR4A3	3041.25	-2.54447	0.290279	-8.76563	1.85742e-18	5.46031e-17
TNFRSF10B	7881.82	1.28141	0.146236	8.76263	1.90753e-18	5.59802e-17
TMPRSS15	2936.93	-6.58674	0.752058	-8.7583	1.9822e-18	5.80723e-17
CEACAM20	303.109	-5.44097	0.621956	-8.74816	2.16857e-18	6.33385e-17
GLRX	3966.86	-1.55036	0.177222	-8.74812	2.16933e-18	6.33385e-17
PMEPA1	24326.4	2.22837	0.25478	8.74624	2.20587e-18	6.42961e-17
HSPD1	35844.7	1.23693	0.141525	8.74007	2.32966e-18	6.77892e-17
GKN2	38538.6	-6.39119	0.731759	-8.73402	2.45788e-18	7.13992e-17
UTP15	1417.81	0.756908	0.0867227	8.72792	2.59401e-18	7.52264e-17
NCAPD2	14429.5	1.13479	0.130177	8.71733	2.8485e-18	8.24672e-17
HACL1	2006.82	-0.903674	0.103696	-8.71462	2.91727e-18	8.4316e-17
KLHDC2	4543.22	-0.760159	0.0872373	-8.71369	2.94139e-18	8.48703e-17
PRKCG	544.064	3.32316	0.381459	8.71172	2.99306e-18	8.62163e-17
MELK	2624.04	1.80887	0.207666	8.71051	3.02516e-18	8.69949e-17
POLR3H	12005.4	-0.807394	0.0927039	-8.70939	3.05514e-18	8.77101e-17
ASB8	3210.42	-0.571659	0.0656585	-8.70655	3.13271e-18	8.9787e-17
NFE2L2	18418.8	-0.777937	0.0893628	-8.70539	3.16495e-18	9.04817e-17
CDKN1A	16007.3	-1.52475	0.175152	-8.7053	3.16749e-18	9.04817e-17
HAGH	2934.99	-0.817271	0.0939983	-8.69454	3.48253e-18	9.93156e-17
IDNK	509.481	-1.31877	0.151684	-8.69423	3.49186e-18	9.94166e-17
FMNL2	5454.62	1.10682	0.127374	8.68958	3.63778e-18	1.034e-16
PINK1	7508.66	-0.932881	0.10737	-8.68849	3.67302e-18	1.04229e-16
MAPK3	17451.7	-1.16447	0.134044	-8.6872	3.71497e-18	1.05245e-16
CTPS1	3280.9	1.00418	0.115652	8.68272	3.86405e-18	1.09288e-16
DNAJB9	3590.41	-0.964647	0.111216	-8.67367	4.18422e-18	1.18149e-16
DNMT3B	998.557	2.16873	0.250061	8.67282	4.21559e-18	1.18839e-16
TMPRSS13	392.84	3.77741	0.435639	8.67096	4.28479e-18	1.20592e-16
HMMR	2518.72	1.78146	0.205599	8.66475	4.5251e-18	1.27147e-16
PRKX	3840.84	1.39371	0.160914	8.6612	4.66843e-18	1.3096e-16
SHBG	84.371	-3.27841	0.37859	-8.65953	4.73707e-18	1.32669e-16
TTF2	2875.88	1.08198	0.125009	8.65523	4.9191e-18	1.37542e-16
SF3B3	21164.8	0.831276	0.0960463	8.65496	4.93097e-18	1.3765e-16
HECW2	1222.51	1.43361	0.165661	8.65388	4.97756e-18	1.38725e-16
OCEL1	1522.81	-1.18619	0.137073	-8.65368	4.98644e-18	1.38747e-16
RASA4	326.947	-1.56107	0.180458	-8.65062	5.12194e-18	1.42287e-16
ANKRD13B	1611.86	1.47062	0.170015	8.64996	5.15163e-18	1.42881e-16
STK3	2848.98	0.877204	0.101459	8.64593	5.33676e-18	1.47777e-16
ID3	5796.63	-1.40434	0.162492	-8.64251	5.49898e-18	1.52023e-16
SGSM3	7945.57	-1.05967	0.122628	-8.64132	5.55649e-18	1.53366e-16
SH3TC2	569.212	2.53712	0.293623	8.64073	5.58531e-18	1.53914e-16
OTOP3	616.949	-5.82988	0.675168	-8.63472	5.88718e-18	1.61973e-16
THY1	19044.9	1.77232	0.2053	8.63285	5.984e-18	1.64373e-16
TNFSF9	916.347	2.91295	0.337608	8.62822	6.23134e-18	1.70894e-16
SPINK2	43.784	-3.73493	0.432913	-8.62744	6.27407e-18	1.71791e-16
DEPDC1	1924.94	1.77179	0.205462	8.62344	6.49731e-18	1.77082e-16
PRRC2C	38297.2	0.792434	0.0918897	8.62375	6.47947e-18	1.77082e-16
SPTBN2	5220.53	2.40463	0.278848	8.62342	6.49824e-18	1.77082e-16
HBA2	1976.01	-2.77246	0.321544	-8.62235	6.55957e-18	1.7847e-16
NUP107	3968.48	1.14346	0.132626	8.62172	6.59584e-18	1.79173e-16
GIP	419.142	-6.34202	0.735906	-8.61798	6.81462e-18	1.84824e-16
INCENP	4570.52	1.13431	0.131669	8.61488	7.00155e-18	1.89594e-16
PFAS	3293.69	0.981555	0.113999	8.61018	7.29443e-18	1.97214e-16
STX6	4942.21	0.655457	0.0762429	8.59695	8.1861e-18	2.20973e-16
IFT80	2480.51	0.887202	0.103226	8.59473	8.34579e-18	2.2493e-16
USP2	805.573	-2.43117	0.282875	-8.5945	8.36309e-18	2.25043e-16
RHCG	158.126	4.28431	0.499165	8.58295	9.24691e-18	2.48436e-16
CXCL9	13437.5	2.98759	0.348243	8.57903	9.56731e-18	2.56643e-16
CKB	20433.9	-2.69356	0.314067	-8.57638	9.79051e-18	2.61812e-16
GNG7	1317.97	-2.15735	0.251542	-8.57653	9.77803e-18	2.61812e-16
VILL	8318.88	-2.11389	0.246624	-8.5713	1.02327e-17	2.73212e-16
TDP2	5186.6	-1.08104	0.126142	-8.57007	1.0342e-17	2.75702e-16
BDH2	2068.07	-1.33114	0.155328	-8.56986	1.03607e-17	2.75772e-16
SLC23A3	280.721	-2.41781	0.282216	-8.56723	1.06007e-17	2.81722e-16
SSR4	25730.3	-1.48802	0.173693	-8.56692	1.06286e-17	2.82028e-16
CCDC107	3185.78	-1.11765	0.13049	-8.56499	1.08082e-17	2.8635e-16
GGCT	5447.04	1.08211	0.126348	8.5645	1.08547e-17	2.87139e-16
MPP1	3053.3	-1.77942	0.207777	-8.56409	1.08929e-17	2.87707e-16
FBXO8	2030.7	-0.744039	0.0869242	-8.55963	1.13229e-17	2.98605e-16
TFF1	97672.1	-4.0936	0.47845	-8.55596	1.16893e-17	3.07795e-16
SGK1	11109.4	-1.58846	0.185738	-8.55213	1.2084e-17	3.177e-16
TBX10	291.767	-3.94565	0.461569	-8.54835	1.24861e-17	3.27771e-16
MYBBP1A	7964.73	0.9423	0.110247	8.54715	1.26169e-17	3.30697e-16
HBA1	1038.77	-2.73566	0.320379	-8.53884	1.35572e-17	3.54336e-16
ADAM17	2740.38	0.74352	0.0870753	8.53882	1.356e-17	3.54336e-16
JUND	38017.4	-1.15073	0.134802	-8.53643	1.38429e-17	3.61178e-16
CHAF1B	1368.16	1.32402	0.15512	8.53546	1.39599e-17	3.63678e-16
ATF3	6725.55	-1.98952	0.233106	-8.5348	1.40397e-17	3.65202e-16
RIF1	7035.58	0.934112	0.109465	8.53343	1.42073e-17	3.69003e-16
ELL2	5381.28	-1.25286	0.14687	-8.53039	1.45849e-17	3.78239e-16
GSTA1	6945.83	-4.12033	0.483032	-8.53014	1.46169e-17	3.78496e-16
LAMC2	23597	2.36983	0.278142	8.52023	1.5924e-17	4.11723e-16
PMM1	2021.18	-1.22142	0.143422	-8.51623	1.64827e-17	4.25526e-16
GPX3	10353	-2.19784	0.258138	-8.51422	1.6772e-17	4.32344e-16
MYOT	136.527	-2.68441	0.315308	-8.51363	1.68571e-17	4.33886e-16
TRIM50	229.612	-4.5117	0.530028	-8.51219	1.70677e-17	4.38651e-16
CCL7	58.0294	3.97037	0.466466	8.5116	1.71553e-17	4.40242e-16
ZNF121	1238.11	1.29161	0.151767	8.51048	1.73211e-17	4.43835e-16
KCNJ16	453.692	-4.18393	0.492116	-8.50193	1.86471e-17	4.771e-16
CHODL	142.182	-3.2149	0.378226	-8.49993	1.897e-17	4.84639e-16
UBAP2L	20416.9	0.609351	0.0717093	8.49752	1.93691e-17	4.941e-16
DDX31	1577.58	0.941837	0.110895	8.49305	2.01276e-17	5.12687e-16
PKP1	530.244	4.0404	0.475811	8.49161	2.0379e-17	5.1832e-16
ANO10	2961.46	-1.08115	0.127409	-8.48566	2.14493e-17	5.44736e-16
DLGAP5	2340.46	1.7286	0.203744	8.48419	2.17235e-17	5.50884e-16
SEC31B	6181.99	-0.828212	0.0976286	-8.48329	2.18916e-17	5.54328e-16
DCAF11	8558.97	-0.764115	0.0901387	-8.4771	2.30873e-17	5.83744e-16
MSH5	1939.15	1.50521	0.177766	8.46736	2.51009e-17	6.33725e-16
TSC22D3	12820.5	-1.79899	0.212628	-8.46073	2.65711e-17	6.69858e-16
FCGR3A	5806.54	1.98094	0.234249	8.45658	2.7533e-17	6.93089e-16
NRG4	268.92	-2.44188	0.288915	-8.4519	2.86589e-17	7.20375e-16
GRB7	9169.65	2.77148	0.327929	8.45148	2.87627e-17	7.21928e-16
MT1X	2704.4	-1.95534	0.231621	-8.44198	3.11998e-17	7.81954e-16
MMP3	2747.79	3.8957	0.461516	8.44109	3.14393e-17	7.86807e-16
ACTL8	174.018	5.3595	0.635103	8.43878	3.20656e-17	8.01314e-16
KRT7	16380.9	3.62316	0.429584	8.43412	3.33707e-17	8.32714e-16
C2orf88	1339.61	-2.16858	0.257154	-8.43299	3.36953e-17	8.39594e-16
SPAG7	2733.53	-0.784502	0.0930772	-8.42851	3.50097e-17	8.71083e-16
VSTM2A	53.0213	-4.74439	0.563167	-8.42448	3.62344e-17	9.0025e-16
BLM	1465.07	1.59522	0.18942	8.4216	3.71378e-17	9.2136e-16
CCNE1	1725.79	2.36425	0.280762	8.42084	3.73787e-17	9.25218e-16
MDH1	11039.1	-0.696268	0.0826846	-8.42077	3.74011e-17	9.25218e-16
HAPLN3	2125.49	1.78036	0.211443	8.42003	3.76375e-17	9.29728e-16
CDHR3	561.846	-1.97854	0.23501	-8.41894	3.79909e-17	9.37109e-16
UBFD1	6168.12	0.765167	0.0909139	8.41639	3.88269e-17	9.56357e-16
ADHFE1	285.251	-2.54033	0.301922	-8.41385	3.96769e-17	9.75892e-16
BLOC1S1	6505.69	-1.09259	0.129888	-8.41176	4.03907e-17	9.91204e-16
CCR10	303.168	-1.91289	0.227409	-8.41169	4.04149e-17	9.91204e-16
KLK8	417.308	4.8767	0.579767	8.41149	4.0483e-17	9.91457e-16
MESP2	81.9307	2.79023	0.331894	8.40699	4.20652e-17	1.02874e-15
APOBEC2	267.426	-2.47784	0.294826	-8.4044	4.30037e-17	1.0502e-15
DGKD	6466.55	-1.14259	0.136041	-8.3989	4.50668e-17	1.09902e-15
G6PC	200.104	-6.27284	0.746981	-8.3976	4.55706e-17	1.10973e-15
JRKL	1523.37	0.905145	0.107789	8.39737	4.56605e-17	1.11034e-15
ZNF331	2311.97	-1.96045	0.233684	-8.38931	4.89015e-17	1.18747e-15
EVX1	75.4249	5.23743	0.625008	8.37978	5.30265e-17	1.28582e-15
CACNG8	197.506	2.73133	0.326044	8.37717	5.42133e-17	1.31274e-15
MTPAP	2831.27	0.771224	0.0920719	8.37632	5.46065e-17	1.3204e-15
DCAF13	5302.66	1.09472	0.130698	8.37591	5.47968e-17	1.32314e-15
JUN	34883.5	-1.37739	0.164478	-8.37431	5.55494e-17	1.33943e-15
POU2F1	7034.38	0.949914	0.113466	8.37178	5.6754e-17	1.36655e-15
ACAT1	4862.69	-1.03588	0.123764	-8.36982	5.7707e-17	1.38745e-15
AQP4	299.513	-5.36679	0.641219	-8.36966	5.77833e-17	1.38745e-15
MXRA5	31934.5	1.75764	0.210053	8.3676	5.88012e-17	1.40991e-15
VMA21	5801.75	0.955188	0.114197	8.36439	6.04264e-17	1.44686e-15
TRIB3	3612.37	2.49869	0.299081	8.35455	6.56832e-17	1.57054e-15
GLUL	44711.8	-1.25169	0.150016	-8.34372	7.19922e-17	1.719e-15
CHSY3	399.843	1.44521	0.173275	8.34056	7.39364e-17	1.76297e-15
TSPYL2	2600.27	-1.6528	0.198216	-8.33836	7.53286e-17	1.79368e-15
ATPAF1	5196.2	-0.633901	0.0760579	-8.33445	7.78585e-17	1.85135e-15
ITGAX	2813.32	1.65353	0.198433	8.33293	7.88691e-17	1.87279e-15
CRY2	4007.3	-1.09846	0.131851	-8.33113	8.00717e-17	1.89872e-15
FUNDC2	4645.12	-0.855333	0.102724	-8.3265	8.32649e-17	1.97171e-15
GJB4	471.231	3.20986	0.385686	8.32246	8.61553e-17	2.03735e-15
BMP6	4122.21	-1.36376	0.163875	-8.32197	8.65152e-17	2.04024e-15
DCTN3	3700.44	-0.929471	0.111687	-8.32213	8.63989e-17	2.04024e-15
FBP1	10711.1	-2.1213	0.254959	-8.32018	8.78334e-17	2.06848e-15
DPY19L1	5970.49	1.20642	0.145137	8.31229	9.38761e-17	2.20776e-15
IMPG2	62.634	-2.08015	0.250306	-8.31045	9.53399e-17	2.23912e-15
GMPS	6368.13	0.863996	0.103998	8.30782	9.74752e-17	2.28614e-15
ATP13A3	16822.6	1.06948	0.128742	8.3071	9.80689e-17	2.29693e-15
RHBDF2	6201.81	1.29882	0.1565	8.29919	1.04827e-16	2.45187e-15
TTC26	514.187	1.08049	0.130248	8.29564	1.08002e-16	2.52268e-15
PPP1R1A	1206.95	-3.82643	0.461634	-8.28888	1.14324e-16	2.66673e-15
SKP2	4122.29	1.49005	0.179925	8.28149	1.21639e-16	2.83351e-15
MAF	7895.33	-1.50815	0.182152	-8.27961	1.23581e-16	2.87486e-15
CRABP2	2203.76	3.18669	0.385154	8.2738	1.29753e-16	3.01207e-15
FAHD2B	457.715	-1.39371	0.16845	-8.27373	1.29831e-16	3.01207e-15
ACTBL2	52.5143	3.80069	0.459581	8.26989	1.34088e-16	3.10664e-15
AQP7	304.078	-2.66323	0.322052	-8.26956	1.3445e-16	3.11083e-15
GLCCI1	2044.38	-1.26146	0.152559	-8.26865	1.35488e-16	3.13063e-15
CCNJ	1247.75	0.986187	0.119296	8.26669	1.37727e-16	3.17808e-15
AKR7A3	9826.49	-2.54964	0.308469	-8.26547	1.3915e-16	3.20662e-15
GNL3L	11263.9	0.822818	0.0995519	8.26522	1.39435e-16	3.20886e-15
PDGFRB	23547.5	1.50833	0.182533	8.2633	1.41705e-16	3.25674e-15
NOL6	7929.97	1.00358	0.121526	8.25815	1.47946e-16	3.39565e-15
KPNA2	13134	1.26901	0.153681	8.2574	1.48884e-16	3.41133e-15
C6orf223	1355.66	3.21673	0.389563	8.25728	1.49027e-16	3.41133e-15
SHCBP1	1183.49	1.419	0.171925	8.25359	1.53703e-16	3.51369e-15
XPNPEP2	3686.51	-3.83037	0.46433	-8.24924	1.59404e-16	3.63915e-15
DONSON	16178.6	-0.864338	0.104826	-8.24546	1.64531e-16	3.75122e-15
MSLN	12308.4	3.49071	0.423698	8.23868	1.74117e-16	3.96452e-15
CDHR5	18796.6	-2.87668	0.349187	-8.23821	1.74801e-16	3.97482e-15
RETSAT	10596.2	-1.17845	0.143098	-8.23523	1.79212e-16	4.06973e-15
COQ6	1526	-0.628748	0.0764024	-8.22943	1.88108e-16	4.2661e-15
MZB1	4298.4	-2.8948	0.352121	-8.22102	2.01782e-16	4.57018e-15
INTS7	3665.12	0.88642	0.107836	8.22005	2.03426e-16	4.60135e-15
FJX1	838.146	1.48184	0.180277	8.21982	2.03809e-16	4.60394e-15
ANKRD1	41.5922	3.9724	0.483916	8.20887	2.23271e-16	5.03694e-15
NAT8	150.493	-4.18823	0.510611	-8.2024	2.35639e-16	5.309e-15
FBXO43	49.9759	2.17052	0.2647	8.19991	2.40569e-16	5.41296e-15
GJB5	415.2	4.02298	0.490707	8.19834	2.43735e-16	5.47701e-15
KRTAP4-1	37.1712	6.78725	0.828651	8.19072	2.59659e-16	5.82723e-15
APOBEC1	680.753	-3.63666	0.444107	-8.18871	2.64036e-16	5.91772e-15
FOXD2	961.743	1.83514	0.224234	8.18406	2.74445e-16	6.143e-15
UQCR11	11847	-0.994737	0.12158	-8.18174	2.7978e-16	6.25424e-15
PNO1	2860.39	0.682085	0.0833767	8.18076	2.82066e-16	6.29716e-15
TNNI3	129.044	3.51306	0.429593	8.17765	2.89434e-16	6.45324e-15
CA11	705.804	-1.49156	0.182538	-8.17119	3.05362e-16	6.79956e-15
ESRRG	994.359	-3.74907	0.458856	-8.17048	3.0716e-16	6.83073e-15
OSBPL10	4235.13	0.980932	0.120074	8.1694	3.09931e-16	6.88343e-15
MCM3	13728.4	1.03143	0.12634	8.16388	3.24419e-16	7.19591e-15
C1orf115	3595.6	-2.0501	0.251206	-8.16103	3.32181e-16	7.35808e-15
NCAPH	2376.77	1.61522	0.197923	8.16088	3.32588e-16	7.35808e-15
VSIG2	9335.77	-3.17686	0.389464	-8.15703	3.43372e-16	7.58688e-15
ZNF485	409.275	1.09775	0.134723	8.14821	3.69364e-16	8.15069e-15
DISP1	1438.2	-1.15848	0.142307	-8.14068	3.93072e-16	8.66272e-15
NETO2	1285.64	2.2007	0.270496	8.1358	4.09221e-16	9.00705e-15
IL11RA	578.513	-1.42651	0.175376	-8.13404	4.15229e-16	9.12759e-15
MMP14	35809.9	1.27726	0.15708	8.13128	4.24777e-16	9.32554e-15
SNRPN	4277.08	-1.75154	0.21542	-8.13079	4.26491e-16	9.35121e-15
PER1	8747.7	-1.75686	0.216108	-8.12957	4.30815e-16	9.43397e-15
TRIM72	117.099	4.47505	0.550512	8.12889	4.33233e-16	9.47483e-15
AHCYL1	18132.7	-0.602185	0.0740937	-8.12735	4.38793e-16	9.58421e-15
GFRA2	197.993	-2.46473	0.303394	-8.12386	4.51589e-16	9.85118e-15
SLC5A9	575.683	-3.10844	0.382651	-8.12343	4.53199e-16	9.87375e-15
SLC52A1	320.155	-2.94537	0.362649	-8.12182	4.59247e-16	9.99283e-15
ADAMTSL1	1159.49	-1.94766	0.239833	-8.1209	4.62747e-16	1.00563e-14
CYP4F2	1278.69	-4.34868	0.53552	-8.1205	4.64283e-16	1.00769e-14
MYL4	38.2619	-2.04492	0.251919	-8.11735	4.76481e-16	1.03155e-14
MAP4K4	15619.3	0.962339	0.118553	8.11738	4.76354e-16	1.03155e-14
ZFP36	51212	-1.7132	0.211081	-8.11629	4.80652e-16	1.03927e-14
RFC4	1992.92	1.06045	0.130681	8.11481	4.86536e-16	1.05067e-14
GRIN2D	4815.43	2.22647	0.27449	8.1113	5.0082e-16	1.08016e-14
LRRC3	924.841	-1.71741	0.211918	-8.10411	5.31339e-16	1.14455e-14
SPARC	123258	1.57943	0.194957	8.10143	5.4317e-16	1.1671e-14
QSOX2	3115.46	1.09239	0.134839	8.10146	5.43046e-16	1.1671e-14
CDC6	3755.46	2.08975	0.258022	8.0991	5.53665e-16	1.18817e-14
ABCA4	55.553	-2.17871	0.269098	-8.09634	5.66372e-16	1.21392e-14
ZNF761	2980.39	1.2194	0.15064	8.09484	5.73397e-16	1.22744e-14
DIP2B	7757.69	0.793958	0.098113	8.09228	5.85592e-16	1.25198e-14
CDHR2	7662.96	-3.2113	0.396851	-8.09195	5.87155e-16	1.25377e-14
CYP27B1	444.326	2.03576	0.251624	8.0905	5.94213e-16	1.26726e-14
SLC25A42	945.367	-1.10918	0.137106	-8.08996	5.96863e-16	1.27133e-14
CYP24A1	96.0314	4.74463	0.586532	8.08929	6.00147e-16	1.27674e-14
CSF2	69.3709	3.62806	0.448542	8.08856	6.03726e-16	1.28277e-14
NUFIP2	13426.9	0.645741	0.0798533	8.08658	6.13614e-16	1.30217e-14
SAPCD2	7097.56	1.88671	0.233348	8.08539	6.19649e-16	1.31335e-14
HSPH1	16293.3	1.21481	0.150265	8.08446	6.24395e-16	1.32178e-14
RNF185	4893.31	-0.562459	0.0695819	-8.08341	6.29801e-16	1.33158e-14
RXRG	89.9368	-3.15933	0.390923	-8.0817	6.38684e-16	1.34526e-14
SERINC5	11445.2	1.10846	0.137159	8.08157	6.39407e-16	1.34526e-14
LIMK1	6473.17	1.02943	0.127374	8.08194	6.37438e-16	1.34526e-14
DGAT1	14783.5	-1.66935	0.206557	-8.08176	6.38397e-16	1.34526e-14
C18orf54	555.724	1.19995	0.148644	8.07267	6.87772e-16	1.44525e-14
ITLN2	272.224	-5.03155	0.623444	-8.07058	6.99638e-16	1.46839e-14
NUP160	6816.99	0.798651	0.098985	8.0684	7.12261e-16	1.49305e-14
VCAN	25744.7	1.67238	0.207289	8.06785	7.1546e-16	1.49793e-14
POTEE	32.0066	5.89944	0.73134	8.06661	7.22748e-16	1.51134e-14
RAD51	1199.18	1.37346	0.170318	8.06411	7.37706e-16	1.54075e-14
DEPDC1B	1819.82	1.67992	0.208348	8.06304	7.442e-16	1.55242e-14
RHPN1	1659.66	1.62546	0.201609	8.06247	7.47685e-16	1.5578e-14
KCNA5	343.745	-2.90131	0.360293	-8.05263	8.10328e-16	1.68456e-14
NUP205	8480.03	0.817429	0.101511	8.05261	8.10487e-16	1.68456e-14
SEMA5B	369.792	1.69774	0.210859	8.05156	8.17444e-16	1.69696e-14
FANCA	4205.94	1.178	0.146312	8.05129	8.19256e-16	1.69867e-14
NEK5	74.5008	2.36128	0.293325	8.05005	8.2762e-16	1.71394e-14
GALT	2071.1	-0.966146	0.120074	-8.04628	8.53502e-16	1.76541e-14
RBM12B	2193.89	0.780002	0.0969686	8.04386	8.70491e-16	1.79839e-14
ORC1	1177.58	1.6477	0.204874	8.04249	8.80313e-16	1.81649e-14
IL23A	275.004	2.31828	0.288278	8.04181	8.85175e-16	1.82433e-14
ATP2A2	45960.6	0.689248	0.0857162	8.04105	8.90689e-16	1.8335e-14
RGS2	6950.4	-1.94795	0.242469	-8.03383	9.44746e-16	1.94244e-14
PPM1A	6817.62	-0.737148	0.0918052	-8.02949	9.78818e-16	2.01009e-14
NDUFS7	6501.06	-0.970482	0.120912	-8.02638	1.00388e-15	2.0591e-14
MYOC	2086.48	-4.69295	0.584809	-8.02475	1.01731e-15	2.08416e-14
ALPI	3635.29	-4.86245	0.606202	-8.02118	1.04733e-15	2.1431e-14
TMEM236	49.206	-4.24574	0.529596	-8.01693	1.08422e-15	2.21595e-14
HPCAL4	77.0905	-2.8425	0.354582	-8.01647	1.08829e-15	2.2216e-14
MMP8	30.0428	4.10429	0.512254	8.01222	1.12658e-15	2.29705e-14
BAD	4557.24	-0.913573	0.114028	-8.0118	1.13039e-15	2.30208e-14
CCR8	84.2046	2.22147	0.277282	8.01161	1.13213e-15	2.30289e-14
FSIP2	412.504	-2.65432	0.331318	-8.01139	1.13419e-15	2.30436e-14
DNASE1	2369.71	-2.20134	0.274901	-8.00778	1.168e-15	2.37025e-14
POLD1	4143.75	1.19302	0.149022	8.00569	1.18803e-15	2.40804e-14
CIRBP	10864.8	-0.877721	0.109643	-8.00525	1.19225e-15	2.41374e-14
SCIN	1738.76	-2.43692	0.304589	-8.0007	1.23718e-15	2.50176e-14
KRT13	633.451	5.30047	0.6627	7.9983	1.2615e-15	2.54793e-14
PPRC1	7769.35	0.735006	0.0919291	7.99536	1.29192e-15	2.60631e-14
SERPINE1	13251.1	2.27394	0.284439	7.99448	1.30118e-15	2.62191e-14
PLEKHA8	1752.76	0.850636	0.106421	7.99312	1.31567e-15	2.648e-14
CES2	32601.1	-2.18672	0.273682	-7.99001	1.34932e-15	2.71254e-14
RILP	1896.64	-1.26494	0.15833	-7.98929	1.35718e-15	2.72515e-14
CPA2	1206.93	-5.0364	0.630459	-7.98847	1.36626e-15	2.74018e-14
SLC9A5	134.517	1.50233	0.188111	7.98639	1.38949e-15	2.78353e-14
FBXL5	8968.31	-0.795743	0.0996394	-7.98623	1.39127e-15	2.78383e-14
ALDH2	28756.9	-1.17311	0.146899	-7.98581	1.39599e-15	2.79004e-14
CENPP	853.588	0.605516	0.0758402	7.98409	1.41558e-15	2.82589e-14
BYSL	2181.8	1.11971	0.140285	7.98166	1.44381e-15	2.8789e-14
PARP14	15262.2	1.15154	0.144331	7.97848	1.48146e-15	2.95054e-14
HAVCR1	149.964	4.0477	0.507538	7.97517	1.52167e-15	3.02711e-14
CHST1	876.142	1.56989	0.196915	7.97245	1.55564e-15	3.09112e-14
DDX55	2237.86	0.806358	0.101149	7.97199	1.5614e-15	3.09896e-14
XPOT	9414.67	1.07869	0.135323	7.97126	1.57064e-15	3.11372e-14
LRRC4	352.24	-1.81084	0.227342	-7.96529	1.64837e-15	3.26403e-14
PLOD3	16280.4	1.17084	0.147052	7.96209	1.69152e-15	3.34561e-14
GPT	1367.7	-2.83782	0.356561	-7.95885	1.73644e-15	3.43051e-14
RPL36AL	14527.9	-0.907911	0.114128	-7.95518	1.78874e-15	3.52574e-14
NUP155	4327.49	1.1682	0.146845	7.95531	1.78677e-15	3.52574e-14
PRICKLE3	2163.61	0.854589	0.107436	7.95443	1.79954e-15	3.54296e-14
TRMT6	2460.89	1.03785	0.130491	7.95344	1.81409e-15	3.56751e-14
NPSR1	675.46	4.80142	0.604185	7.94693	1.91187e-15	3.75549e-14
SMC6	3864.59	0.713714	0.089863	7.94225	1.98552e-15	3.89571e-14
SOSTDC1	1367.53	-3.76103	0.473636	-7.94077	2.00929e-15	3.93785e-14
CD36	3040.59	-2.25687	0.284412	-7.9352	2.10157e-15	4.114e-14
TNFAIP2	13943.4	1.70463	0.214999	7.92855	2.21728e-15	4.33557e-14
ITGA11	5245.51	1.88766	0.238195	7.92487	2.28378e-15	4.46052e-14
CEP72	1035.1	1.64524	0.207618	7.92433	2.29378e-15	4.47496e-14
GSTA3	17.092	-5.42473	0.684686	-7.92295	2.31937e-15	4.51975e-14
CAPN9	1271.02	-3.36287	0.424503	-7.92191	2.33899e-15	4.55281e-14
TIMP1	71370.5	1.5913	0.200878	7.92173	2.34235e-15	4.55418e-14
CHIT1	1111.75	3.7626	0.475045	7.92051	2.36539e-15	4.59377e-14
KRT6B	907.369	4.18242	0.528088	7.91993	2.37654e-15	4.61021e-14
PDK4	16196.6	-2.80879	0.354697	-7.91884	2.39739e-15	4.64541e-14
SLC22A11	45.9849	4.35311	0.549922	7.91588	2.45513e-15	4.75193e-14
MYOM2	203.147	-1.81679	0.229541	-7.91491	2.47424e-15	4.78353e-14
GART	8699.2	0.802011	0.101332	7.91465	2.47943e-15	4.78817e-14
MLYCD	1423.41	-0.933279	0.118	-7.90915	2.59155e-15	4.99907e-14
TRIM3	1464.39	-0.859425	0.108675	-7.90822	2.61098e-15	5.03089e-14
RRP1B	6846.45	0.74855	0.0946961	7.90476	2.68455e-15	5.16686e-14
PEBP1	24022.3	-0.916771	0.116042	-7.90036	2.78109e-15	5.34668e-14
SASS6	1215.44	0.999364	0.126545	7.89728	2.8506e-15	5.47417e-14
TYMS	5409.89	1.38727	0.17568	7.89658	2.86666e-15	5.49879e-14
CBX3	15403.2	0.821121	0.103986	7.89644	2.86983e-15	5.49879e-14
ACER2	2201.75	-2.07553	0.262997	-7.89184	2.97759e-15	5.69891e-14
SCEL	387.168	4.04139	0.512281	7.889	3.04606e-15	5.82347e-14
MT1F	1672.39	-2.16735	0.274838	-7.88589	3.12307e-15	5.96405e-14
SURF1	3411.65	-0.791094	0.10039	-7.88022	3.26815e-15	6.23418e-14
LDHD	1606.68	-2.16143	0.2743	-7.8798	3.27907e-15	6.24807e-14
METTL7A	9628.96	-1.61559	0.205063	-7.8785	3.3133e-15	6.30629e-14
CLDN16	99.3626	2.64435	0.335712	7.87685	3.35745e-15	6.38325e-14
RDH8	37.9228	4.78884	0.608008	7.87627	3.37308e-15	6.40586e-14
HES2	459.484	2.93454	0.372621	7.87539	3.39669e-15	6.44358e-14
ADRB2	342.255	-2.16831	0.275345	-7.87489	3.41046e-15	6.45544e-14
PSCA	58587.1	-4.41576	0.560735	-7.87495	3.40879e-15	6.45544e-14
APOC1	5331.41	2.2228	0.282324	7.87321	3.45642e-15	6.53523e-14
SH3BGR	491.67	-2.22242	0.282287	-7.8729	3.46521e-15	6.54463e-14
IGLL5	165395	-3.12861	0.397692	-7.86692	3.63476e-15	6.85731e-14
FAM71E2	10.2907	4.75698	0.605168	7.86059	3.82337e-15	7.20523e-14
CPA4	33.9817	3.3482	0.426311	7.8539	4.03311e-15	7.59215e-14
SLC38A7	2283.09	0.784581	0.0999138	7.85258	4.07561e-15	7.66375e-14
CARD14	762.354	2.15871	0.275004	7.84976	4.16846e-15	7.82977e-14
ANP32E	7835.89	1.04532	0.133181	7.84891	4.19685e-15	7.87448e-14
CAT	12641.2	-0.933324	0.118942	-7.84689	4.26495e-15	7.99353e-14
ANG	3641.32	-1.55447	0.198158	-7.84458	4.34391e-15	8.13264e-14
HAUS6	2431.7	1.03985	0.132564	7.84415	4.35899e-15	8.15198e-14
DLEU7	53.6822	1.71281	0.218522	7.83814	4.57253e-15	8.54203e-14
CPO	31.0416	-3.09474	0.395068	-7.83345	4.74659e-15	8.85754e-14
TNFRSF11B	1222.52	2.73433	0.349211	7.83003	4.87758e-15	9.09211e-14
MORC2	4326.46	0.682347	0.0871583	7.82882	4.92484e-15	9.17025e-14
NOLC1	14863.4	0.912587	0.11658	7.82796	4.95845e-15	9.22282e-14
NAA15	6697.22	0.69717	0.0890692	7.82728	4.98531e-15	9.26276e-14
CGB5	37.7502	6.59947	0.843203	7.82668	5.00942e-15	9.29475e-14
GDF9	1291.81	-1.07316	0.137118	-7.82658	5.01336e-15	9.29475e-14
RNASE4	8622.62	-1.42658	0.182282	-7.82625	5.02655e-15	9.30915e-14
CEP135	1255.66	0.809079	0.103441	7.82166	5.21295e-15	9.64395e-14
KRT15	719.246	2.78536	0.356398	7.8153	5.48308e-15	1.01328e-13
FOXC1	3279.21	1.87268	0.239637	7.81464	5.51198e-15	1.01752e-13
DIO2	4990.07	1.81996	0.232939	7.81303	5.58284e-15	1.0295e-13
PNLIP	62.7224	-6.30433	0.806939	-7.81265	5.59992e-15	1.03154e-13
LRRC3B	20.6861	-3.06674	0.392554	-7.81229	5.61589e-15	1.03337e-13
IGFBP1	139.381	4.67394	0.598442	7.81018	5.71051e-15	1.04966e-13
CHORDC1	2993.99	1.04294	0.133553	7.80917	5.75645e-15	1.05697e-13
ITGB8	6358.85	1.52788	0.195689	7.80769	5.82441e-15	1.06831e-13
VAMP2	8222.42	-1.0315	0.132171	-7.80428	5.98433e-15	1.09647e-13
EFNA3	3835.37	1.72266	0.220781	7.80256	6.06631e-15	1.1103e-13
LYAR	2885.43	1.01239	0.129769	7.80149	6.11805e-15	1.11858e-13
CYP2C19	4355.97	-2.65932	0.340908	-7.80068	6.15727e-15	1.12455e-13
CLDN6	223.399	5.38952	0.690942	7.80024	6.17899e-15	1.12732e-13
ALAD	6541.66	-0.709795	0.0910179	-7.79841	6.26902e-15	1.14253e-13
EGFL6	503.17	2.26036	0.289995	7.79446	6.46869e-15	1.17767e-13
UNC45B	126.25	-3.40192	0.437071	-7.78346	7.05699e-15	1.28342e-13
AKR1C3	16772.3	-2.15693	0.277159	-7.78229	7.12232e-15	1.29393e-13
UTP18	2954.6	0.76067	0.0977478	7.78196	7.14069e-15	1.29589e-13
TDRD5	336.66	3.03787	0.390469	7.78007	7.24869e-15	1.3141e-13
CBX7	6320.89	-1.66052	0.21346	-7.77907	7.30592e-15	1.32308e-13
GABARAP	29766.1	-0.830947	0.106822	-7.77878	7.32277e-15	1.3235e-13
SUCLG2	9151.47	-0.9338	0.120045	-7.77876	7.32364e-15	1.3235e-13
DKK1	2280.38	4.20988	0.541392	7.77603	7.48352e-15	1.35097e-13
ACADM	5051.69	-1.0275	0.132141	-7.77576	7.49965e-15	1.35246e-13
PTK7	8767.92	1.75944	0.226436	7.77015	7.83918e-15	1.4122e-13
ADA	2309.68	-1.93431	0.249041	-7.76703	8.03468e-15	1.4459e-13
TMEM220	775.02	-1.64025	0.211257	-7.76421	8.21574e-15	1.47694e-13
PRPF40A	13622.8	0.611231	0.0787412	7.76253	8.32533e-15	1.49508e-13
ZMIZ2	16640.1	0.787845	0.101499	7.76208	8.35455e-15	1.49875e-13
DUSP9	112.406	4.29564	0.553502	7.76083	8.43738e-15	1.51203e-13
AUH	1458.82	-0.774527	0.0998013	-7.7607	8.44647e-15	1.51209e-13
LEF1	2300.54	1.53459	0.198029	7.74932	9.23838e-15	1.65213e-13
CHML	2340.78	1.27266	0.164272	7.74731	9.38578e-15	1.67674e-13
SLC15A1	2032.27	-4.15116	0.536072	-7.74366	9.65933e-15	1.72382e-13
CENPA	968.661	1.69727	0.219192	7.74331	9.68626e-15	1.72683e-13
ATP6V0D1	11212.5	-0.833695	0.107704	-7.74062	9.89363e-15	1.76197e-13
SEC22C	3535.86	-0.624699	0.0807492	-7.73629	1.02363e-14	1.82111e-13
MOAP1	2763.77	-0.899922	0.116336	-7.73553	1.02974e-14	1.83008e-13
KLK9	104.17	4.59266	0.593724	7.73534	1.03127e-14	1.83091e-13
ADAT2	1021.2	1.17828	0.152333	7.7349	1.03488e-14	1.83542e-13
FBXO45	2643.68	0.826714	0.106895	7.73391	1.04289e-14	1.84772e-13
NDUFB8	7521.98	-0.835504	0.108039	-7.73334	1.04759e-14	1.85412e-13
MFN2	13081.1	-0.780088	0.100888	-7.7322	1.05706e-14	1.86896e-13
FUT5	7798.76	-1.02493	0.132577	-7.73082	1.06855e-14	1.88733e-13
NAP1L5	567.618	-1.65432	0.214032	-7.72929	1.08146e-14	1.90817e-13
UBE2C	6996.26	1.88463	0.243901	7.72701	1.10103e-14	1.93872e-13
CXCL11	1991.33	2.81554	0.364371	7.72712	1.10003e-14	1.93872e-13
PGF	1204.56	1.38276	0.178973	7.72608	1.10906e-14	1.95085e-13
CELSR1	5546.15	1.77607	0.229948	7.72381	1.12901e-14	1.98392e-13
CHST4	377.38	3.4701	0.449455	7.72068	1.1571e-14	2.0312e-13
WBP1	3731.84	-0.850692	0.110222	-7.71796	1.18206e-14	2.07289e-13
CYP2C9	598.786	-3.02564	0.392279	-7.71298	1.22913e-14	2.15324e-13
DNAJC4	3778.56	-0.90069	0.116798	-7.71152	1.24333e-14	2.17576e-13
PRH1	1233.86	-1.63211	0.21165	-7.71139	1.24452e-14	2.17576e-13
TAS2R14	1279.02	-1.57315	0.204022	-7.71071	1.25117e-14	2.18516e-13
CLUL1	66.7176	-1.68105	0.218027	-7.7103	1.25523e-14	2.19001e-13
BBC3	2062.99	1.21534	0.157639	7.7096	1.26211e-14	2.19979e-13
UQCR10	8806.67	-1.04956	0.136194	-7.7064	1.29413e-14	2.25332e-13
CHAF1A	2992.39	0.989704	0.128436	7.70583	1.29993e-14	2.26112e-13
ZC3HAV1L	983.748	1.25743	0.163207	7.70452	1.31337e-14	2.28218e-13
C22orf39	2803.68	-0.876653	0.113809	-7.70282	1.33093e-14	2.31036e-13
KLRB1	585.547	-1.94492	0.252523	-7.70194	1.34016e-14	2.32403e-13
CAB39L	2454.96	-1.84781	0.240024	-7.69843	1.37752e-14	2.38641e-13
TRAF2	2772.27	0.844966	0.10978	7.69688	1.39431e-14	2.41305e-13
RHOB	53688.8	-1.67	0.216996	-7.69602	1.40365e-14	2.42677e-13
ZP1	17.9152	-2.34659	0.305006	-7.6936	1.43047e-14	2.47065e-13
KAT2B	3387.49	-1.19034	0.154724	-7.69328	1.4341e-14	2.47443e-13
BTC	423.852	-1.85048	0.2406	-7.69109	1.45888e-14	2.51467e-13
ZMYM1	1924.51	0.816644	0.106213	7.68872	1.48618e-14	2.55915e-13
MOGAT2	1219.26	-3.69218	0.480225	-7.68843	1.48957e-14	2.56242e-13
MTUS2	213.857	-3.08855	0.401902	-7.68484	1.53194e-14	2.63266e-13
EN2	233.642	4.46702	0.581444	7.68263	1.55853e-14	2.67568e-13
DDX10	3126.36	0.743722	0.0968359	7.68024	1.58794e-14	2.72346e-13
CENPH	900.118	1.18147	0.153855	7.67913	1.60171e-14	2.74433e-13
MT1G	4935.97	-2.79971	0.364668	-7.67744	1.62304e-14	2.7781e-13
PDK2	7093.08	-0.927883	0.120871	-7.67666	1.63296e-14	2.79229e-13
GSTM5	646.901	-2.44927	0.319305	-7.67062	1.71167e-14	2.92397e-13
ZNF750	156.521	3.00873	0.392281	7.66983	1.72226e-14	2.93729e-13
CXCL10	4793.2	2.62096	0.341725	7.66978	1.72288e-14	2.93729e-13
MAP2K2	12712.1	-0.789972	0.103001	-7.66953	1.72632e-14	2.94022e-13
NDUFB7	7920.79	-0.923272	0.120398	-7.66851	1.74004e-14	2.96065e-13
SLC12A8	2659.55	1.101	0.143597	7.66731	1.7564e-14	2.98552e-13
MCM7	15152.8	1.19827	0.156294	7.66674	1.76416e-14	2.99576e-13
FGL2	12124.2	-2.19342	0.28618	-7.66449	1.79543e-14	3.04584e-13
UBE2T	2267.62	1.41084	0.184103	7.66332	1.81192e-14	3.07078e-13
UAP1L1	2576.72	1.40731	0.183681	7.66167	1.83529e-14	3.10733e-13
GSTA2	1132.3	-4.26601	0.5569	-7.66027	1.85539e-14	3.13826e-13
TADA2B	3892.81	-0.495862	0.0647397	-7.65932	1.86913e-14	3.15839e-13
SERPINB2	584.124	3.86737	0.50511	7.65649	1.91088e-14	3.22381e-13
TEX10	2426.42	0.820786	0.107202	7.65644	1.9116e-14	3.22381e-13
SEMA6D	1502.48	-2.14991	0.280902	-7.65359	1.95445e-14	3.29283e-13
ACOX3	2165.37	-0.708108	0.0925348	-7.65235	1.97342e-14	3.32154e-13
PHF14	8404.45	0.973881	0.127269	7.65214	1.97667e-14	3.32375e-13
FSCN1	12104.3	1.76162	0.230258	7.65062	2.00007e-14	3.3598e-13
CDT1	4154.86	1.61464	0.211056	7.65027	2.00565e-14	3.36589e-13
CHI3L1	4660.1	2.54943	0.333354	7.64782	2.04416e-14	3.42716e-13
ABCA13	313.966	2.90011	0.379356	7.64483	2.09226e-14	3.50096e-13
COL22A1	639.347	2.44643	0.320009	7.64487	2.0916e-14	3.50096e-13
NOP56	13473.6	0.963376	0.12603	7.64404	2.1051e-14	3.51902e-13
SLC17A8	58.2192	-4.67401	0.611855	-7.63909	2.18762e-14	3.6534e-13
ISCU	8525.53	-0.769168	0.100701	-7.63813	2.20391e-14	3.67704e-13
ACO1	7661.69	-0.920344	0.120564	-7.63366	2.28189e-14	3.80344e-13
PSAPL1	2754.54	-4.1348	0.541753	-7.63226	2.30668e-14	3.84104e-13
ACSF2	2447.2	-1.48189	0.194202	-7.63068	2.33519e-14	3.88474e-13
MAOA	9627.92	-1.81902	0.238404	-7.62999	2.34777e-14	3.9019e-13
POLE2	741.246	1.21547	0.159315	7.62937	2.3591e-14	3.91693e-13
TMEM100	813.486	-2.7994	0.366931	-7.62923	2.36164e-14	3.91735e-13
SBSN	27.1266	4.61886	0.605476	7.62849	2.37523e-14	3.9361e-13
C10orf55	1074.28	1.62464	0.213005	7.62724	2.39828e-14	3.97045e-13
UBD	18965	2.49541	0.327177	7.6271	2.401e-14	3.97113e-13
JDP2	2829.19	-1.03998	0.13636	-7.62668	2.40882e-14	3.98024e-13
SLC26A7	108.005	-2.59858	0.340905	-7.62261	2.48592e-14	4.10368e-13
PBK	2473.36	1.81521	0.238279	7.61799	2.57651e-14	4.24914e-13
SLC1A3	1232.4	1.89378	0.248639	7.61657	2.60498e-14	4.29197e-13
ACACB	4466.32	-1.65486	0.217372	-7.61303	2.67734e-14	4.40696e-13
COMMD1	1756.95	-0.781315	0.102649	-7.6115	2.70942e-14	4.45549e-13
HLF	1484.04	-2.64227	0.347204	-7.61012	2.73846e-14	4.49893e-13
CDC25B	13894.5	1.40069	0.184069	7.60955	2.75059e-14	4.51454e-13
SLC5A1	10123.3	-2.87724	0.378182	-7.60809	2.78169e-14	4.56123e-13
KLHDC8A	184.263	-1.6908	0.222251	-7.60762	2.79185e-14	4.57352e-13
OAT	15634.4	-1.53458	0.201723	-7.60735	2.7978e-14	4.5789e-13
UBAP2	8616.4	0.705473	0.0927894	7.60294	2.89475e-14	4.73305e-13
DNASE1L3	456.842	-2.47675	0.325835	-7.60123	2.93319e-14	4.79135e-13
ACOT11	3510.75	-1.44603	0.19027	-7.59988	2.96404e-14	4.83254e-13
LIPF	210486	-5.97127	0.785705	-7.59989	2.9639e-14	4.83254e-13
KCNIP4	142.228	-1.48071	0.194882	-7.598	3.0075e-14	4.89874e-13
FAM161B	638.899	-1.07677	0.141722	-7.59779	3.01238e-14	4.90205e-13
SRSF10	471.27	0.999367	0.131544	7.59722	3.02566e-14	4.91898e-13
RNF11	9701.87	-0.70634	0.092985	-7.59628	3.04768e-14	4.9501e-13
PER3	4445.95	-1.55274	0.204419	-7.59584	3.05798e-14	4.96213e-13
UBXN6	7035.59	-0.629042	0.0828322	-7.59418	3.09753e-14	5.02157e-13
ANKRD53	122.709	-1.7874	0.235373	-7.59391	3.10383e-14	5.02703e-13
ALDOC	2633.2	-1.66196	0.21889	-7.59269	3.13335e-14	5.07006e-13
CMTM5	42.3977	-3.44235	0.453535	-7.59004	3.19805e-14	5.16988e-13
LRP1B	59.3836	-2.67928	0.353298	-7.58363	3.3602e-14	5.4269e-13
PHOX2A	56.314	-2.2922	0.302263	-7.58348	3.36416e-14	5.42819e-13
UBL3	8290.26	-0.8595	0.113373	-7.58114	3.42532e-14	5.52167e-13
ODF2	4305.08	0.751539	0.0991638	7.57877	3.48848e-14	5.61821e-13
CALCOCO1	7895.19	-1.11372	0.146956	-7.57859	3.49322e-14	5.62059e-13
OFCC1	10.3207	5.3452	0.70534	7.5782	3.50388e-14	5.63245e-13
LRRN4	209.747	2.7893	0.368351	7.57241	3.66369e-14	5.88384e-13
KLF9	10038.1	-1.70403	0.225104	-7.56998	3.73269e-14	5.98906e-13
CCDC159	900.111	-1.05006	0.13875	-7.56803	3.78927e-14	6.07415e-13
BTBD16	128.811	2.50426	0.330911	7.56779	3.79637e-14	6.07986e-13
PEBP4	69.6966	-3.25397	0.430101	-7.5656	3.86072e-14	6.17715e-13
SARM1	4768.26	-1.0902	0.144126	-7.56421	3.90241e-14	6.23804e-13
KIFC1	3371.21	1.48266	0.196018	7.5639	3.91164e-14	6.24698e-13
AURKA	4209.66	1.54283	0.204062	7.56061	4.01186e-14	6.40108e-13
CSNK1G1	3837.52	0.620628	0.0821139	7.55813	4.08915e-14	6.51833e-13
SMPD1	3890.57	-0.921725	0.121998	-7.55524	4.18102e-14	6.65861e-13
DTX3L	14837.5	0.843542	0.111674	7.5536	4.23395e-14	6.73665e-13
CDK2	3814.86	0.839735	0.111197	7.55176	4.29405e-14	6.82595e-13
C11orf96	11317.1	-1.94078	0.257058	-7.54997	4.35365e-14	6.91429e-13
U2AF1L4	874.282	-0.999309	0.132409	-7.54714	4.4492e-14	7.05951e-13
CDK13	7652.28	0.554797	0.0735227	7.54593	4.49081e-14	7.11895e-13
ZC3H8	753.321	0.820042	0.108731	7.54197	4.62941e-14	7.33189e-13
MFSD12	9440.68	0.873043	0.115791	7.53981	4.70652e-14	7.44714e-13
ATG4A	1639.29	-0.727767	0.0965265	-7.53956	4.71555e-14	7.45457e-13
NUP43	3974.18	0.724221	0.096071	7.53839	4.75796e-14	7.51468e-13
EGR1	34965.9	-1.89169	0.250962	-7.53775	4.78164e-14	7.54515e-13
WDR90	3987.81	1.08341	0.143793	7.53454	4.90051e-14	7.72562e-13
LMNB1	7552.91	1.3557	0.179995	7.53189	5.00109e-14	7.87694e-13
TIGD1	525.502	1.08343	0.143864	7.53096	5.03682e-14	7.92596e-13
ALKBH7	5208.58	-0.995652	0.13225	-7.52859	5.12928e-14	8.064e-13
MEF2B	1373.29	-0.998448	0.132623	-7.52847	5.13394e-14	8.064e-13
NOM1	3299.35	0.719496	0.0956262	7.52405	5.31034e-14	8.33345e-13
NDUFA11	9327.8	-0.968283	0.128706	-7.52324	5.34343e-14	8.37772e-13
SCARA5	1571.29	-3.03056	0.402844	-7.52292	5.35664e-14	8.39076e-13
ZNF749	588.764	0.955896	0.127124	7.51938	5.50366e-14	8.61321e-13
SDCBP2	10346.4	-1.4501	0.192859	-7.51898	5.52037e-14	8.62364e-13
NEIL3	351.621	1.53549	0.204212	7.5191	5.51561e-14	8.62364e-13
CYP19A1	64.3635	2.78715	0.370862	7.51534	5.67635e-14	8.85924e-13
RNF24	2934.44	1.13701	0.1513	7.51494	5.69368e-14	8.87821e-13
SELENBP1	9121.52	-1.64181	0.218484	-7.51455	5.71053e-14	8.8964e-13
TPM1	62228.8	-1.98961	0.26481	-7.51335	5.76348e-14	8.97076e-13
TXNDC11	7899.31	-0.827764	0.110182	-7.51273	5.79081e-14	9.00512e-13
POU5F1B	68.9803	2.69396	0.358654	7.51131	5.85405e-14	9.09524e-13
TRIM73	76.2528	-1.61816	0.215501	-7.50881	5.96667e-14	9.26182e-13
NPAS1	157.896	-1.75678	0.233969	-7.50863	5.97503e-14	9.26643e-13
PHF1	4525.69	-0.886539	0.118121	-7.50534	6.12717e-14	9.49379e-13
DUSP1	33146.7	-1.76059	0.234708	-7.5012	6.32347e-14	9.78912e-13
NUSAP1	5479.97	1.3806	0.184098	7.49927	6.41763e-14	9.92593e-13
TFF2	39230	-4.11507	0.548838	-7.49779	6.49021e-14	1.00292e-12
EAF2	498.839	-1.39142	0.18559	-7.49726	6.51643e-14	1.00516e-12
NSUN2	7697.13	0.801799	0.106945	7.49728	6.51533e-14	1.00516e-12
BOP1	1361.03	1.16508	0.155477	7.49362	6.70005e-14	1.03255e-12
S100A3	207.195	1.9509	0.260413	7.49154	6.8068e-14	1.04712e-12
SCRIB	16726.6	0.974996	0.130145	7.49159	6.80425e-14	1.04712e-12
CDKN2A	2948.96	2.92957	0.391121	7.49017	6.87826e-14	1.05717e-12
GDPD5	2108.56	1.71871	0.229624	7.48489	7.16086e-14	1.09962e-12
CCNA2	4961.15	1.3467	0.179935	7.48438	7.18862e-14	1.1029e-12
HSP90AA1	111756	0.81491	0.108886	7.48408	7.20481e-14	1.1044e-12
TMEM25	1706.09	-1.7411	0.232664	-7.48332	7.24697e-14	1.10987e-12
PLA2G7	1639.29	1.77563	0.237356	7.48087	7.38333e-14	1.12974e-12
UQCRQ	11869.5	-1.04785	0.140289	-7.46922	8.06746e-14	1.23332e-12
LY6H	117.75	-2.32984	0.312085	-7.4654	8.30448e-14	1.26843e-12
RAB5B	20079.8	-0.62495	0.08374	-7.46298	8.45875e-14	1.29084e-12
GRIK1	38.491	-2.09485	0.280768	-7.46117	8.57598e-14	1.30757e-12
FICD	556.729	-0.943093	0.12645	-7.45821	8.7709e-14	1.33492e-12
KRT16	598.045	3.53019	0.473323	7.45831	8.76412e-14	1.33492e-12
GPATCH4	5268	0.911349	0.122205	7.45753	8.81611e-14	1.34061e-12
TMPO	16348.8	0.93279	0.125085	7.45726	8.83377e-14	1.34211e-12
PLAC9	589.391	-2.0153	0.270277	-7.45642	8.89079e-14	1.34958e-12
PAK1IP1	2008.11	0.822605	0.110335	7.45549	8.95316e-14	1.35784e-12
HDC	272.562	-2.25894	0.303021	-7.45472	9.00566e-14	1.3646e-12
RACGAP1	5670.4	1.099	0.14746	7.45288	9.13273e-14	1.38263e-12
HELB	634.597	1.20882	0.162221	7.45168	9.21562e-14	1.39273e-12
ZBTB22	1744.24	-0.675699	0.0906764	-7.45176	9.20998e-14	1.39273e-12
PROSER1	9710.92	0.981702	0.131747	7.45143	9.23338e-14	1.39418e-12
UQCRC2	18771.2	-0.794671	0.10665	-7.45121	9.24878e-14	1.39528e-12
ADCYAP1R1	231.796	-3.10028	0.416141	-7.45007	9.32874e-14	1.40611e-12
RNF122	1195.59	-1.22445	0.164526	-7.44227	9.8972e-14	1.49048e-12
ANAPC1	3157.55	0.804434	0.108104	7.44129	9.97096e-14	1.50028e-12
BHLHA15	405.461	-2.2921	0.308102	-7.4394	1.0114e-13	1.52047e-12
PHGR1	14898.9	-3.60942	0.485388	-7.43614	1.03669e-13	1.55712e-12
MRPL54	2222.4	-0.88566	0.119105	-7.43598	1.03795e-13	1.55765e-12
SLC11A1	1113.35	1.67065	0.224689	7.43538	1.0427e-13	1.56341e-12
LIN9	1317.39	0.985155	0.132515	7.43428	1.0514e-13	1.57509e-12
AKR1B15	463.964	-4.43387	0.596639	-7.43142	1.07438e-13	1.60811e-12
HAGHL	780.869	1.66744	0.224408	7.43039	1.0828e-13	1.6193e-12
COL12A1	33411.5	1.67815	0.225918	7.42814	1.10132e-13	1.64556e-12
RCC1	5942.37	1.16376	0.156674	7.42796	1.10288e-13	1.64645e-12
CD3EAP	2686.54	0.848997	0.114313	7.42699	1.111e-13	1.65714e-12
KIF24	1365.05	1.07095	0.144244	7.42459	1.13134e-13	1.68601e-12
SPIN4	2000.97	1.50384	0.202649	7.42093	1.16298e-13	1.73166e-12
KAZALD1	1370.29	-1.40199	0.18896	-7.4195	1.1756e-13	1.74893e-12
TUBAL3	341.446	-3.55342	0.47904	-7.41779	1.19087e-13	1.77012e-12
TSN	8671.93	0.611951	0.0825321	7.4147	1.21897e-13	1.81031e-12
ZNF281	2071.05	0.646639	0.0872362	7.41251	1.2393e-13	1.83892e-12
NPAS4	61.6903	-3.08935	0.416892	-7.41043	1.25893e-13	1.86644e-12
TMEM59	30285.7	-0.705181	0.095201	-7.40729	1.2891e-13	1.90951e-12
ZFAND2B	2379.49	-0.74789	0.100988	-7.40572	1.30446e-13	1.9306e-12
FAM117A	2816.73	-1.39661	0.188593	-7.40543	1.30731e-13	1.93315e-12
HAPLN2	17.1162	-2.2389	0.302381	-7.40424	1.31901e-13	1.94878e-12
ZNF146	9600.05	0.695157	0.0939032	7.40291	1.33228e-13	1.96668e-12
POLE	7138.69	0.93909	0.126874	7.40177	1.34381e-13	1.982e-12
NDUFS4	3316.08	-0.854842	0.1155	-7.40124	1.34918e-13	1.98822e-12
SIX1	460.67	2.46403	0.332989	7.39973	1.36466e-13	2.00931e-12
SCNN1G	181.194	-4.01583	0.542784	-7.39858	1.3765e-13	2.025e-12
MYO1A	7121.04	-2.67733	0.361893	-7.39814	1.38107e-13	2.02998e-12
SCRN2	2082.19	-0.8825	0.119402	-7.39102	1.45708e-13	2.13988e-12
CTDSP1	15690.2	-0.596338	0.0806907	-7.39042	1.46363e-13	2.14766e-12
ASPA	166.014	-2.25983	0.305814	-7.38956	1.47312e-13	2.15973e-12
PSMD11	9462.43	0.693299	0.0938241	7.38935	1.47553e-13	2.16143e-12
FAM13A	3572.24	-1.34423	0.181979	-7.38673	1.50482e-13	2.20245e-12
XKR8	1272.41	-0.730212	0.0988663	-7.38585	1.51483e-13	2.21522e-12
IDO1	5874.8	3.18263	0.431029	7.38378	1.53857e-13	2.24801e-12
ARHGEF37	2140.7	-1.47296	0.199531	-7.38212	1.55784e-13	2.27424e-12
TMEM116	711.468	-0.912293	0.123583	-7.38201	1.55919e-13	2.27428e-12
MYBL2	10372.7	1.79095	0.242851	7.37469	1.64727e-13	2.40071e-12
PPP1CB	28275.1	-0.736306	0.0998669	-7.37287	1.66992e-13	2.43166e-12
HS3ST2	300.23	2.28684	0.310248	7.371	1.69349e-13	2.46388e-12
DESI2	6430.07	0.590425	0.0801046	7.37068	1.69761e-13	2.46779e-12
MSANTD1	56.2986	-2.11948	0.28763	-7.36879	1.72181e-13	2.50085e-12
LGALS7B	40.5379	3.87575	0.526013	7.36815	1.73009e-13	2.50863e-12
LIG1	4278.61	1.09987	0.149272	7.36826	1.72872e-13	2.50863e-12
COL18A1	29765.6	1.27458	0.173058	7.36508	1.77045e-13	2.56498e-12
LGI4	673.92	-1.99815	0.271438	-7.36136	1.82045e-13	2.6352e-12
MOB2	3020.38	-0.809127	0.109944	-7.35944	1.84677e-13	2.67105e-12
MPI	3596.24	-0.817417	0.111158	-7.35367	1.92831e-13	2.78664e-12
NASP	7692.87	0.767752	0.104413	7.35305	1.93739e-13	2.7974e-12
RHEBL1	127.521	1.47831	0.201088	7.35158	1.95884e-13	2.826e-12
SH2D5	79.621	3.03324	0.412632	7.35094	1.96811e-13	2.83698e-12
KIAA1191	10974.7	-0.592673	0.080636	-7.34998	1.98234e-13	2.8551e-12
NPTN	14313.9	-0.665175	0.090537	-7.34699	2.02715e-13	2.9172e-12
ACOX2	940.575	-1.89724	0.258378	-7.34288	2.09045e-13	3.00577e-12
CDCA4	2715.35	1.04107	0.141784	7.34265	2.0941e-13	3.0085e-12
GGH	4969.91	2.0948	0.28535	7.34115	2.11761e-13	3.03973e-12
MET	17226.1	1.84478	0.251318	7.3404	2.12949e-13	3.05423e-12
ALDH3B2	567.678	2.68589	0.365921	7.34009	2.13452e-13	3.05889e-12
GLOD5	162.845	-2.24124	0.305386	-7.33903	2.15143e-13	3.08054e-12
CEP152	783.328	0.937966	0.12781	7.33878	2.15542e-13	3.08369e-12
NKD2	956.698	2.72786	0.371727	7.33834	2.16252e-13	3.09126e-12
GRM8	109.027	2.3701	0.323074	7.33608	2.19947e-13	3.14147e-12
EPHX1	9885.09	-1.12054	0.152759	-7.33533	2.21177e-13	3.15642e-12
INTS8	5129.82	0.781786	0.106619	7.33254	2.25824e-13	3.22006e-12
MICALL1	7645.46	-1.04478	0.142488	-7.33238	2.26099e-13	3.22131e-12
MEP1A	4907.37	-4.04584	0.551852	-7.33139	2.27785e-13	3.24263e-12
ZIC2	902.376	3.67201	0.500948	7.33013	2.29924e-13	3.27038e-12
FOXE3	34.4644	3.04961	0.416069	7.32957	2.30889e-13	3.28119e-12
ADI1	8958.04	-0.863423	0.117802	-7.32947	2.31067e-13	3.28119e-12
CYB5R1	3919.49	-0.939123	0.128157	-7.32793	2.33727e-13	3.31621e-12
CDCA7	7232.63	1.58613	0.21651	7.32592	2.37266e-13	3.36366e-12
CHEK2	1159.48	1.09973	0.15012	7.32567	2.37712e-13	3.3672e-12
TUBB3	4066.29	1.80956	0.247073	7.324	2.40685e-13	3.40649e-12
MORC4	3846.57	1.19945	0.163783	7.32343	2.41709e-13	3.41817e-12
FBXO41	1852.45	1.3987	0.191006	7.3228	2.42854e-13	3.43154e-12
MAMDC2	1528.56	-2.9295	0.400113	-7.32168	2.44881e-13	3.45734e-12
SPC24	438.152	1.25352	0.171212	7.32143	2.45348e-13	3.46108e-12
UTP14A	3242.9	0.737699	0.100793	7.31897	2.49889e-13	3.52224e-12
ADD1	24908	-0.666553	0.0910829	-7.31809	2.51529e-13	3.54245e-12
B3GNTL1	99.7314	1.31124	0.179193	7.31749	2.52644e-13	3.55524e-12
ABCG8	453.842	-3.88331	0.530892	-7.31469	2.5797e-13	3.62722e-12
ZNF280C	845.511	0.947651	0.129618	7.31112	2.64928e-13	3.722e-12
ITIH2	131.716	3.12653	0.42774	7.30942	2.68289e-13	3.76614e-12
TPRG1L	8236.93	-0.635841	0.0870461	-7.30465	2.77994e-13	3.89918e-12
TIPIN	707.577	0.945711	0.129482	7.30383	2.79688e-13	3.91974e-12
RPS6KA5	1293.27	-1.10788	0.151698	-7.30319	2.8103e-13	3.93534e-12
PNOC	234.391	-2.41874	0.331297	-7.30082	2.86025e-13	4.00201e-12
BCL7A	2701.64	0.903146	0.123716	7.30013	2.87484e-13	4.01916e-12
LOX	5407.97	1.60071	0.219315	7.29865	2.90672e-13	4.06042e-12
CKS1B	1546.54	1.11185	0.152346	7.29818	2.91692e-13	4.07135e-12
RFX8	30.1213	2.02668	0.277771	7.29621	2.95989e-13	4.12797e-12
IRF4	1648	-2.16772	0.297124	-7.29566	2.97202e-13	4.14153e-12
PCNA	16320.3	1.19229	0.163488	7.29286	3.03454e-13	4.22522e-12
FBXL13	196.375	-1.51999	0.208439	-7.29226	3.04795e-13	4.24046e-12
CHMP1B	9691.57	-0.848686	0.116468	-7.28684	3.17299e-13	4.41084e-12
FAM107A	1403.31	-2.09848	0.287992	-7.28658	3.17913e-13	4.4158e-12
THTPA	1248.94	-0.733228	0.100669	-7.28353	3.25201e-13	4.51338e-12
TAF2	5205.29	0.663092	0.0910459	7.28305	3.26348e-13	4.52565e-12
DIAPH3	1631.64	1.41253	0.193968	7.28228	3.28231e-13	4.54808e-12
GABARAPL1	4298.82	-1.30012	0.178585	-7.28009	3.3359e-13	4.61861e-12
ZNF473	1572.7	0.885653	0.121696	7.27761	3.39784e-13	4.70058e-12
POLR3G	515.421	1.50275	0.206587	7.27419	3.48512e-13	4.81744e-12
CEP85	1655.35	0.959426	0.131933	7.27208	3.53986e-13	4.88917e-12
ABL2	4622.33	0.74706	0.102742	7.27125	3.56169e-13	4.91536e-12
C17orf78	793.494	-4.04571	0.55641	-7.2711	3.56568e-13	4.91692e-12
CYB5D2	1440.74	-0.755993	0.10398	-7.27059	3.57912e-13	4.93149e-12
NDRG2	6020.18	-1.24641	0.171446	-7.26999	3.59513e-13	4.94958e-12
P2RY14	955.157	-2.07362	0.285266	-7.26909	3.61929e-13	4.97884e-12
FAM81A	888.006	1.61312	0.221983	7.26685	3.67975e-13	5.05796e-12
CGRRF1	716.178	-0.689215	0.0948526	-7.26617	3.69829e-13	5.07938e-12
POGK	8318.78	0.634073	0.0872662	7.26596	3.70397e-13	5.08312e-12
EPM2A	885.753	-1.55911	0.214609	-7.26488	3.73376e-13	5.1199e-12
MTHFD2	7306.09	1.10131	0.151681	7.26073	3.85016e-13	5.27531e-12
SLC9A1	17731.5	-1.28814	0.177435	-7.25981	3.87649e-13	5.30714e-12
NOL8	3708.31	0.704945	0.0971056	7.25957	3.88324e-13	5.31215e-12
CHD7	6300.84	1.08992	0.150148	7.259	3.89954e-13	5.3302e-12
SOX9	26480	1.40348	0.19339	7.25727	3.9497e-13	5.39446e-12
AP3M2	1948.97	0.896224	0.123496	7.25709	3.95494e-13	5.39733e-12
ARL3	2244.04	-0.748983	0.103237	-7.255	4.01667e-13	5.47722e-12
CYP27B1	30.2916	2.13373	0.294127	7.25445	4.03293e-13	5.49503e-12
STX8	2102.74	-0.810747	0.111798	-7.25191	4.10932e-13	5.59467e-12
COL5A1	50899.2	1.56057	0.215211	7.25135	4.12625e-13	5.61328e-12
WT1	120.531	3.66023	0.504859	7.25	4.16777e-13	5.66526e-12
FMO4	487.932	-1.27267	0.175562	-7.24913	4.1947e-13	5.69736e-12
MEX3D	5952.96	0.9055	0.124915	7.24893	4.20083e-13	5.70117e-12
CENPN	3891.33	0.98736	0.136212	7.24872	4.20738e-13	5.70555e-12
CCDC86	4553.9	0.908119	0.125319	7.24643	4.2789e-13	5.79796e-12
HYI	1990.51	-0.994308	0.137246	-7.24471	4.33363e-13	5.86749e-12
YTHDF1	9416.74	0.683858	0.0944481	7.24057	4.46799e-13	6.04463e-12
WDR36	4792.62	0.756039	0.104422	7.24022	4.47959e-13	6.05556e-12
WDR72	2360.13	3.17842	0.439047	7.23936	4.50815e-13	6.08937e-12
RPS25	33927.9	-0.978158	0.135146	-7.23778	4.56089e-13	6.15577e-12
PBXIP1	13810.1	-1.10077	0.152112	-7.23657	4.60171e-13	6.20598e-12
CCDC138	446.47	1.11785	0.154478	7.23634	4.60947e-13	6.21157e-12
TIMM8A	827.543	0.838851	0.115933	7.23563	4.63389e-13	6.23958e-12
SPRR3	465.029	4.89821	0.677206	7.23297	4.72545e-13	6.35787e-12
CCNB1	5219.15	1.34373	0.18586	7.2298	4.83703e-13	6.50291e-12
CCDC18	585.904	1.01086	0.139868	7.22722	4.92967e-13	6.62227e-12
DDX18	9434.51	0.611083	0.0845618	7.22647	4.95717e-13	6.65401e-12
LGALS9B	363.044	-3.56287	0.493192	-7.22411	5.04402e-13	6.76529e-12
MEGF6	3010.79	1.32252	0.183101	7.2229	5.08903e-13	6.82033e-12
ITGA2	9725.12	1.43815	0.199175	7.22052	5.17902e-13	6.93552e-12
RAE1	5068.71	0.828536	0.114873	7.2126	5.48927e-13	7.34526e-12
FEN1	4220.56	1.03474	0.143482	7.21161	5.52957e-13	7.39343e-12
TBX5	60.8421	4.31969	0.599037	7.21105	5.55222e-13	7.41793e-12
DHX9	20039.9	0.547319	0.0759077	7.21033	5.58179e-13	7.45165e-12
TXNDC15	4860.31	-0.658989	0.0914556	-7.20556	5.78053e-13	7.71097e-12
MND1	421.901	1.37606	0.191071	7.20182	5.9415e-13	7.91954e-12
RAD51D	704.118	0.645664	0.0896822	7.19946	6.04504e-13	8.05129e-12
COL4A1	69086.7	1.32804	0.184484	7.19868	6.07998e-13	8.09156e-12
COL8A1	5742.87	2.12395	0.295087	7.1977	6.12363e-13	8.14192e-12
AKR1B10	20884.1	-3.38399	0.470154	-7.19762	6.12731e-13	8.14192e-12
DHX33	3168.01	0.689424	0.0958219	7.19485	6.25291e-13	8.3024e-12
CCDC14	3124.33	0.938504	0.130448	7.19449	6.26932e-13	8.31776e-12
C11orf52	775.123	-1.22567	0.170477	-7.18968	6.49434e-13	8.60963e-12
URB1	5991.04	0.884334	0.123008	7.18921	6.51668e-13	8.63258e-12
ACADSB	3527.95	-1.12144	0.156033	-7.18723	6.6119e-13	8.75197e-12
RPGRIP1L	850.777	0.812044	0.113004	7.18596	6.67389e-13	8.82722e-12
HMGCLL1	39.0956	-2.53822	0.353663	-7.17694	7.12882e-13	9.41442e-12
TGS1	3550.51	0.740556	0.103185	7.17699	7.12636e-13	9.41442e-12
FOXH1	415.792	1.76713	0.246247	7.17624	7.1653e-13	9.45533e-12
MC2R	8.71968	4.24762	0.59215	7.17321	7.32595e-13	9.6599e-12
NOP58	10027.5	0.909693	0.12683	7.17255	7.36113e-13	9.69884e-12
NCL	50102.9	0.638764	0.0890824	7.17048	7.47326e-13	9.83902e-12
GRM2	59.0664	1.64492	0.229432	7.16953	7.52564e-13	9.89443e-12
C6orf15	81.6259	5.88529	0.820878	7.16951	7.52687e-13	9.89443e-12
WNT5A	3601.64	1.53184	0.213671	7.16916	7.54599e-13	9.91198e-12
NR3C2	2195.22	-1.52348	0.212564	-7.16716	7.65693e-13	1.005e-11
LRRC8B	3779.12	0.820458	0.114479	7.16691	7.67088e-13	1.00606e-11
SULT1B1	1286.07	-2.63748	0.36802	-7.16669	7.68309e-13	1.0069e-11
LARP1	30094.7	0.620123	0.0865425	7.16553	7.74863e-13	1.01471e-11
MMP27	5.81792	-2.99531	0.418058	-7.16483	7.78838e-13	1.01836e-11
NMRK1	1363.07	-0.928945	0.129653	-7.16487	7.78605e-13	1.01836e-11
QSER1	5935.34	0.897084	0.125241	7.16286	7.90109e-13	1.03231e-11
DSTN	55438.5	-1.32399	0.184883	-7.16125	7.99469e-13	1.04375e-11
SPC25	1022.39	1.35015	0.188543	7.16097	8.0106e-13	1.04503e-11
PFDN5	15039.5	-0.783128	0.109374	-7.16008	8.06316e-13	1.05109e-11
TXN2	7624.49	-0.77775	0.108701	-7.15494	8.3712e-13	1.09042e-11
F2RL2	2637.08	1.75233	0.244935	7.15427	8.41201e-13	1.0949e-11
FXYD1	900.477	-2.55234	0.356813	-7.15316	8.48047e-13	1.10298e-11
IGFBP6	3415.62	-1.91629	0.267908	-7.1528	8.50249e-13	1.105e-11
PTPN12	9700.73	0.80203	0.112132	7.15257	8.51685e-13	1.10603e-11
PAWR	2898.52	0.804293	0.112463	7.15164	8.57476e-13	1.11271e-11
POLA1	3014.73	0.858211	0.120048	7.14888	8.74916e-13	1.13448e-11
DUSP27	297.775	4.49921	0.629584	7.14633	8.91316e-13	1.15488e-11
DHRS4	3132.38	-0.890608	0.124627	-7.14618	8.92277e-13	1.15525e-11
UBE2QL1	308.988	-2.15645	0.301798	-7.14534	8.97744e-13	1.16145e-11
SRPK1	11336.4	0.821125	0.114957	7.14288	9.13931e-13	1.1815e-11
LGR5	3391.98	2.66339	0.372898	7.14243	9.1698e-13	1.18455e-11
TINF2	4444.83	-0.574472	0.08044	-7.14162	9.22349e-13	1.19059e-11
ILF3	26692.9	0.573634	0.0803309	7.14089	9.27295e-13	1.19608e-11
GABRA3	273.002	5.07717	0.71183	7.13256	9.852e-13	1.26981e-11
PHF6	3504.28	0.975056	0.136708	7.1324	9.86373e-13	1.27037e-11
NANP	1032.76	0.87827	0.123171	7.13052	9.99909e-13	1.28684e-11
TESK2	1052.22	-0.852688	0.119604	-7.12925	1.00917e-12	1.29778e-11
ATAD3B	2299.64	1.09681	0.153891	7.12718	1.02448e-12	1.31648e-11
FGFBP2	67.9058	-1.83189	0.257086	-7.12558	1.03646e-12	1.33088e-11
SUSD2	3472.59	-1.93092	0.271005	-7.12504	1.04049e-12	1.33506e-11
LMBRD1	6347.97	-0.62251	0.0874088	-7.12182	1.06512e-12	1.36564e-11
CCNE2	1342.64	1.27906	0.179672	7.11884	1.08841e-12	1.39446e-11
DCAF8	15966.4	-0.463405	0.0651031	-7.11801	1.09498e-12	1.40183e-11
TUBB	91687.5	0.621256	0.0873096	7.11556	1.11462e-12	1.42592e-11
NUP85	3788.76	0.626635	0.0880877	7.11377	1.12918e-12	1.44239e-11
PPP1R13L	6278.16	1.30345	0.183228	7.1138	1.12894e-12	1.44239e-11
IL1RAP	1704.43	1.29695	0.182318	7.11366	1.13002e-12	1.44239e-11
CDC45	1421.14	1.49091	0.209653	7.11132	1.14939e-12	1.46602e-11
CAMK2A	141.421	-2.40391	0.338307	-7.10573	1.19692e-12	1.52552e-11
PTBP1	43393.9	0.60238	0.084843	7.09994	1.24813e-12	1.58961e-11
XRCC3	2123.74	0.849351	0.11965	7.09862	1.2601e-12	1.60366e-11
PGA5	26721.2	-6.68611	0.94201	-7.09771	1.26844e-12	1.61309e-11
ZNF92	1606.39	0.908801	0.12805	7.09723	1.27279e-12	1.61742e-11
EPHX2	3625.79	-1.56839	0.221075	-7.09439	1.29923e-12	1.64979e-11
STC2	1074.25	1.643	0.231625	7.09335	1.309e-12	1.66096e-11
CCNB2	3569.7	1.36098	0.19191	7.09175	1.32425e-12	1.67908e-11
PCK1	5997.38	-3.51152	0.495274	-7.09006	1.34052e-12	1.69845e-11
OTUD1	2788.15	-0.885625	0.124957	-7.08747	1.3659e-12	1.72805e-11
SLC12A9	6755.99	0.845802	0.119336	7.08755	1.36506e-12	1.72805e-11
NR4A1	21631.7	-1.79028	0.252692	-7.08482	1.39229e-12	1.76015e-11
SLC6A6	9034.01	0.937143	0.132367	7.07989	1.44273e-12	1.82258e-11
SFMBT1	2586.29	0.804848	0.113728	7.07697	1.47341e-12	1.85997e-11
CEP78	1797.56	0.798649	0.112934	7.07183	1.52899e-12	1.92871e-11
ALDH3A1	7831.74	-2.74337	0.388069	-7.06928	1.55737e-12	1.96306e-11
XDH	2866.17	-2.58035	0.365453	-7.0607	1.6567e-12	2.08673e-11
COX7C	18993.2	-0.899067	0.127348	-7.0599	1.66618e-12	2.09714e-11
OGDH	22401.9	-0.714334	0.101198	-7.0588	1.6795e-12	2.11235e-11
HMGCL	3586.38	-0.819588	0.116121	-7.05806	1.68847e-12	2.12208e-11
CD276	10992.4	0.899083	0.127489	7.05222	1.76087e-12	2.21145e-11
GJB6	101.087	3.72376	0.528091	7.05136	1.77182e-12	2.22358e-11
PHYH	4229.81	-1.1342	0.16089	-7.04953	1.79528e-12	2.25138e-11
ARMC3	59.8204	3.0553	0.433455	7.04871	1.80578e-12	2.26289e-11
PI16	1985.14	-3.0819	0.437287	-7.04779	1.81783e-12	2.27633e-11
BORA	1764.67	0.979221	0.138984	7.04558	1.84684e-12	2.31098e-11
PTPRU	5290.63	1.75998	0.249824	7.0449	1.85593e-12	2.32065e-11
SNX2	6562.63	-0.614681	0.0872726	-7.04323	1.8783e-12	2.34692e-11
SLC22A17	1887.03	-1.85509	0.263423	-7.04225	1.89166e-12	2.36189e-11
BRIX1	3765.35	1.00359	0.142592	7.03816	1.94789e-12	2.43033e-11
PECR	1333.22	-1.11253	0.158112	-7.03635	1.97342e-12	2.4604e-11
CA14	176.757	-1.83852	0.261342	-7.03494	1.99353e-12	2.48367e-11
SULF2	19265.1	1.31561	0.187056	7.03326	2.01765e-12	2.5119e-11
TAF1D	2750.04	0.968865	0.13779	7.03147	2.04371e-12	2.5408e-11
SOCS2	1891.67	-1.24937	0.177683	-7.03146	2.04383e-12	2.5408e-11
TTPAL	2798.18	0.777158	0.110535	7.0309	2.05198e-12	2.54909e-11
PSMD12	4443.45	0.605536	0.0861354	7.03005	2.06464e-12	2.5611e-11
WBP2	14130.5	-0.657658	0.0935494	-7.03007	2.06431e-12	2.5611e-11
WDR12	2304.96	0.822323	0.116981	7.02953	2.07229e-12	2.56874e-11
SEH1L	5195.6	0.865979	0.123249	7.02624	2.1217e-12	2.62809e-11
FCGR2A	5536.85	1.26255	0.179702	7.02581	2.1283e-12	2.63437e-11
TRPM2	1972.41	1.37324	0.195574	7.02163	2.19294e-12	2.71242e-11
ZNF688	1389	-0.834324	0.118833	-7.02099	2.20297e-12	2.72286e-11
PLK1	6793.54	1.42634	0.203234	7.01819	2.24755e-12	2.77597e-11
BAG4	3084.31	0.878169	0.125131	7.01799	2.2509e-12	2.77811e-11
FAM102A	18430.3	-0.920199	0.131161	-7.01578	2.28674e-12	2.82031e-11
NDUFA4	21231.6	-0.882269	0.125785	-7.01408	2.3146e-12	2.85262e-11
EFTUD2	11227.9	0.687818	0.0980892	7.01217	2.34652e-12	2.88988e-11
ZBTB41	3109.1	0.832802	0.118774	7.01166	2.3551e-12	2.89838e-11
XYLT2	4740.22	-0.942424	0.134438	-7.0101	2.38147e-12	2.92873e-11
PIN1	4746.3	-0.694952	0.0991387	-7.00989	2.38505e-12	2.93104e-11
KIAA2012	36.4165	2.26159	0.322636	7.00972	2.38792e-12	2.93246e-11
DSN1	2454.93	0.949981	0.135552	7.00824	2.41335e-12	2.96158e-11
PLIN5	277.873	-1.70001	0.242586	-7.00787	2.41975e-12	2.96519e-11
ELK1	5602.94	0.615332	0.0878056	7.00789	2.41939e-12	2.96519e-11
TBL1XR1	15355.6	0.686903	0.0980227	7.00759	2.42456e-12	2.96896e-11
MFHAS1	7320.45	1.03056	0.147086	7.00647	2.444e-12	2.99063e-11
KIF4B	14.9838	1.89118	0.269977	7.00497	2.47031e-12	3.02068e-11
HOXD11	77.2437	7.1216	1.01694	7.00298	2.50566e-12	3.06172e-11
TNFRSF6B	7411.48	2.10221	0.300194	7.00285	2.50807e-12	3.06249e-11
DNAH2	345.23	2.25051	0.321405	7.00208	2.52188e-12	3.07716e-11
CASP9	1727.47	-0.685997	0.0979751	-7.00175	2.5279e-12	3.08232e-11
B3GALT4	1214.95	-1.03461	0.147795	-7.00027	2.55473e-12	3.11281e-11
IPO9	12254.9	0.616476	0.0880979	6.99763	2.6033e-12	3.16975e-11
CACFD1	4304.43	-1.10925	0.158582	-6.99478	2.65683e-12	3.23263e-11
TMEM82	503.087	-2.9814	0.426256	-6.99437	2.6645e-12	3.23967e-11
FOXL2	38.5324	3.91516	0.559878	6.99288	2.69306e-12	3.27207e-11
PIM2	6263.6	-1.46066	0.209003	-6.98868	2.77478e-12	3.36899e-11
GBA2	7020.73	-0.724423	0.103689	-6.98651	2.8181e-12	3.41916e-11
CCDC69	8322.17	-1.86205	0.266534	-6.98617	2.82494e-12	3.42504e-11
PBLD	4210.62	-1.76457	0.252593	-6.98585	2.83145e-12	3.43051e-11
RAI1	9286.82	0.632951	0.0906424	6.98294	2.89056e-12	3.49965e-11
ADAMTS1	8721.1	-1.73913	0.249074	-6.98238	2.90228e-12	3.51137e-11
SLC28A3	1187.6	2.34688	0.336129	6.98209	2.90823e-12	3.51609e-11
ATG9B	1099.45	1.34664	0.192935	6.97977	2.95657e-12	3.57201e-11
NDUFA1	8612.86	-0.990862	0.141998	-6.97798	2.99456e-12	3.61538e-11
FHOD1	2806.41	0.74698	0.107058	6.97731	3.00895e-12	3.63019e-11
C12orf56	70.5329	4.16635	0.597333	6.97492	3.06047e-12	3.68976e-11
ACTL6A	6106.87	0.875727	0.125618	6.97133	3.13952e-12	3.78241e-11
LHX1	49.5371	4.43825	0.637085	6.9665	3.24914e-12	3.91173e-11
NOL11	4670.93	0.630429	0.0905143	6.96497	3.28484e-12	3.95194e-11
BAG3	10803	-1.16826	0.167767	-6.96361	3.31663e-12	3.98706e-11
COL5A3	3480.35	1.4485	0.208012	6.96352	3.31868e-12	3.98706e-11
ZNF860	378.618	1.30423	0.187303	6.96323	3.32552e-12	3.99249e-11
SLCO1B1	15.2812	5.0863	0.730462	6.96312	3.32807e-12	3.99275e-11
SSTR1	2570.73	-2.25203	0.323428	-6.963	3.33106e-12	3.99355e-11
ACOT2	2516.66	-0.879889	0.126371	-6.96277	3.33653e-12	3.99732e-11
SLC6A19	7200.45	-3.91988	0.56321	-6.95988	3.40557e-12	4.07719e-11
COX7A1	1000.8	-1.76325	0.253365	-6.95933	3.41906e-12	4.09048e-11
STMN1	13606.1	1.06241	0.152664	6.95913	3.42389e-12	4.09341e-11
SCP2	17488.7	-0.766578	0.110187	-6.95707	3.47421e-12	4.15068e-11
AKR7A2	7235.83	-0.903381	0.129875	-6.95576	3.50676e-12	4.18665e-11
MAGEA1	118.993	7.90429	1.1367	6.95373	3.55748e-12	4.24425e-11
TTI1	4191.74	0.757724	0.108982	6.95274	3.58255e-12	4.27119e-11
RTEL1	10413.8	1.60075	0.23028	6.95132	3.61875e-12	4.31137e-11
PDGFD	1907.03	-1.50174	0.21606	-6.95055	3.63873e-12	4.33216e-11
GPR84	178.14	1.80953	0.260422	6.94846	3.69308e-12	4.39382e-11
ECHDC2	2784.71	-1.14739	0.165327	-6.94009	3.91849e-12	4.65877e-11
BFSP2	34.5067	-2.26301	0.326266	-6.93608	4.03117e-12	4.78943e-11
CACNA1E	392.442	2.63514	0.379927	6.93592	4.0359e-12	4.79173e-11
SLC7A9	1074.63	-3.36333	0.484983	-6.93494	4.064e-12	4.82175e-11
G3BP1	12460.6	0.659313	0.0950988	6.93292	4.12236e-12	4.88761e-11
LRP11	7792.59	0.846033	0.12204	6.93241	4.13735e-12	4.90201e-11
OCLM	49.0373	1.52229	0.219634	6.93104	4.17762e-12	4.94631e-11
ZIC5	432.749	4.08613	0.589785	6.92817	4.26311e-12	5.04404e-11
ACADVL	19318.4	-0.74884	0.108116	-6.92629	4.3201e-12	5.10795e-11
COX5B	16948.4	-0.93982	0.135693	-6.92608	4.32656e-12	5.11207e-11
SLCO4A1	4983.13	1.66437	0.240314	6.92579	4.33562e-12	5.11926e-11
SMYD5	3333.84	0.603885	0.0872135	6.92422	4.38395e-12	5.17276e-11
DARS2	5341.01	1.03006	0.148789	6.92295	4.42342e-12	5.21574e-11
PEX11G	359.749	-0.996245	0.144	-6.91838	4.56842e-12	5.38302e-11
HUS1	2309.66	0.613817	0.0887321	6.91765	4.59197e-12	5.40705e-11
FAM122B	4449.07	0.891107	0.12883	6.91689	4.61656e-12	5.43229e-11
STX5	4820.29	-0.623651	0.0902178	-6.91273	4.7541e-12	5.5903e-11
HSP90AB1	138384	0.905085	0.130971	6.91056	4.82738e-12	5.67259e-11
SNX8	4688.53	0.851799	0.12328	6.90949	4.86393e-12	5.71162e-11
FOS	44512	-1.69963	0.24601	-6.90877	4.88885e-12	5.73389e-11
FRMD5	528.013	1.75004	0.253308	6.90875	4.88957e-12	5.73389e-11
ACOT8	3357.88	-0.814704	0.117937	-6.90795	4.91701e-12	5.76213e-11
ZNF217	9128.44	1.1049	0.160034	6.90414	5.05067e-12	5.91473e-11
BARD1	784.586	0.949678	0.137557	6.9039	5.05944e-12	5.92096e-11
MAT1A	171.085	3.13056	0.453468	6.90359	5.07044e-12	5.92172e-11
OSCAR	575.48	1.4478	0.209714	6.9037	5.06663e-12	5.92172e-11
ZCWPW2	81.9511	-1.37083	0.198567	-6.90361	5.06969e-12	5.92172e-11
MRPS36	2459.13	-0.78567	0.113847	-6.90113	5.15908e-12	6.02114e-11
XRN2	12272.5	0.640368	0.092807	6.9	5.2004e-12	6.06525e-11
SLC5A6	6401.53	1.00381	0.145496	6.8992	5.22974e-12	6.09533e-11
TMTC4	3292.09	0.910719	0.132034	6.89763	5.2877e-12	6.1587e-11
HPSE	1614.67	1.42619	0.206798	6.89655	5.32824e-12	6.20171e-11
PMP22	10233.5	-1.26958	0.184117	-6.8955	5.36763e-12	6.24332e-11
TAF1A	593.482	0.858661	0.124545	6.89436	5.41065e-12	6.2891e-11
CPA1	134.736	-4.26048	0.617978	-6.89423	5.41555e-12	6.29054e-11
DPP6	633.878	-3.49865	0.507599	-6.89254	5.48033e-12	6.36148e-11
GPATCH2	1485.65	0.606475	0.0880177	6.89037	5.5646e-12	6.45493e-11
MALL	2961.74	-2.0124	0.292084	-6.8898	5.58717e-12	6.47674e-11
NOXO1	978.254	2.1306	0.309464	6.88482	5.78601e-12	6.69819e-11
RANBP3L	51.5798	-2.32347	0.337474	-6.8849	5.78273e-12	6.69819e-11
XPO4	5462.11	0.818396	0.118876	6.88444	5.80161e-12	6.71173e-11
CA1	1279.54	-4.34047	0.630645	-6.88259	5.8776e-12	6.79507e-11
TSPYL1	10171.2	-0.602257	0.0875085	-6.88227	5.89072e-12	6.80565e-11
KRT5	320.559	3.37661	0.490768	6.88026	5.97417e-12	6.89278e-11
RP1L1	58.9449	2.0714	0.301061	6.88032	5.97162e-12	6.89278e-11
PLEKHG1	3806.93	0.971534	0.141269	6.87721	6.10368e-12	7.03748e-11
ATIC	9606.89	0.694348	0.100974	6.87652	6.1333e-12	7.06687e-11
CYBRD1	17269.9	-1.71311	0.249168	-6.87533	6.18477e-12	7.1214e-11
RPRD1B	6071.55	0.651132	0.094713	6.87479	6.20816e-12	7.14354e-11
MZT2B	75.2993	1.27621	0.185758	6.87029	6.40714e-12	7.36756e-11
RPP40	707.076	0.970913	0.141408	6.86606	6.59994e-12	7.58419e-11
AMMECR1	2822.87	0.881869	0.128456	6.86514	6.64239e-12	7.62787e-11
NKX6-2	667.396	-5.37458	0.782903	-6.86493	6.65244e-12	7.6343e-11
FBXO5	1444.48	0.92041	0.134088	6.8642	6.68627e-12	7.66799e-11
TMEM158	1844.83	1.49647	0.218042	6.86323	6.73223e-12	7.71555e-11
PLP1	792.554	-3.3462	0.487618	-6.86234	6.77422e-12	7.75849e-11
ARRB1	8292.65	-1.02565	0.149465	-6.86216	6.78267e-12	7.76299e-11
LY6D	616.982	3.98272	0.580536	6.86041	6.86644e-12	7.85364e-11
ZNF239	708.413	1.13056	0.164888	6.85652	7.0559e-12	8.06496e-11
FLRT1	209.728	-2.06509	0.30122	-6.85574	7.09454e-12	8.10373e-11
TERT	203.244	2.43372	0.355059	6.85443	7.15987e-12	8.17291e-11
SI	14098.6	-4.31116	0.628985	-6.85415	7.17376e-12	8.18334e-11
DAGLA	2571.87	1.25601	0.183341	6.85067	7.35042e-12	8.37928e-11
EIF4E3	3977.99	-1.23338	0.180074	-6.84932	7.41999e-12	8.45298e-11
CRHBP	50.9815	-1.8898	0.27597	-6.84785	7.4968e-12	8.53482e-11
MED11	1604.48	-0.766777	0.112017	-6.84516	7.63915e-12	8.69111e-11
INPP5J	1239.21	-1.48172	0.216525	-6.8432	7.74431e-12	8.80492e-11
FBXL15	2481.34	-0.751929	0.109888	-6.84269	7.77192e-12	8.83047e-11
TACC3	6458.81	1.15338	0.168587	6.84144	7.84028e-12	8.90224e-11
PDP1	4768.24	0.980751	0.143394	6.83955	7.94441e-12	9.01452e-11
ZNF195	2365.93	0.838059	0.12255	6.83853	8.00093e-12	9.07265e-11
COX8A	22726.3	-0.917273	0.134139	-6.83824	8.017e-12	9.08032e-11
NOL10	3677.35	0.532178	0.077824	6.83822	8.01827e-12	9.08032e-11
ATP6V1G2	109.033	-1.88335	0.275427	-6.83792	8.03491e-12	9.09317e-11
SMC1B	107.453	2.51539	0.36787	6.83771	8.04686e-12	9.10069e-11
MON1A	2038.94	-0.842852	0.123317	-6.83485	8.20888e-12	9.27172e-11
OSMR	9425.3	1.38544	0.202702	6.83487	8.20797e-12	9.27172e-11
VANGL1	4699.32	0.703661	0.103029	6.82977	8.50538e-12	9.60028e-11
CSTF3	2970.49	0.5371	0.0786663	6.82757	8.63649e-12	9.74187e-11
SERTAD3	2298	-0.758253	0.111108	-6.82447	8.82524e-12	9.94824e-11
LRRC58	9167.79	0.67525	0.0990385	6.81806	9.22813e-12	1.03956e-10
PPM1H	4315.34	1.38567	0.203383	6.81311	9.55092e-12	1.07521e-10
NME5	102.73	-1.92714	0.28289	-6.81234	9.6024e-12	1.0803e-10
HSPB2	510.987	-1.67406	0.245791	-6.81088	9.70004e-12	1.09057e-10
DHRS1	1907.76	-1.0048	0.147534	-6.81063	9.71718e-12	1.09178e-10
EPHB2	11139.2	1.91474	0.281218	6.80875	9.84492e-12	1.10541e-10
CADM2	262.718	-3.10513	0.456057	-6.80865	9.85175e-12	1.10546e-10
CPB1	142.325	-4.10294	0.602725	-6.80732	9.94321e-12	1.11499e-10
SH3YL1	97.2812	1.46451	0.21516	6.80663	9.99124e-12	1.11964e-10
SBNO2	14388.8	0.799014	0.117391	6.80644	1.00043e-11	1.12038e-10
SNX1	9957	-0.559686	0.0822343	-6.80599	1.00353e-11	1.12312e-10
PGLYRP4	25.5675	3.90249	0.573399	6.80588	1.00432e-11	1.12326e-10
FRMD8	5957	0.750032	0.110207	6.80569	1.00566e-11	1.12403e-10
SPRN	406.502	0.786146	0.115516	6.80549	1.00707e-11	1.12488e-10
SNAP29	5978.13	-0.493434	0.0725236	-6.80377	1.01918e-11	1.13767e-10
SIK1	13301	-1.46689	0.215769	-6.79841	1.05778e-11	1.17922e-10
ATP2B2	50.5918	-2.49328	0.366743	-6.79843	1.05766e-11	1.17922e-10
UGP2	8893.09	-0.490593	0.0721723	-6.79753	1.06425e-11	1.18566e-10
HNRNPU	44610.8	0.491942	0.0723724	6.79737	1.06547e-11	1.18625e-10
WDR89	1309.73	0.569751	0.0838291	6.79657	1.07136e-11	1.19203e-10
JUNB	41890.6	-1.20507	0.177335	-6.79542	1.08e-11	1.20087e-10
GIT1	10576	0.689852	0.101527	6.79479	1.08469e-11	1.2053e-10
GNL2	5082.68	0.578623	0.0851713	6.79364	1.0934e-11	1.21419e-10
DNAJC2	4132.05	0.900781	0.132622	6.79208	1.10531e-11	1.22663e-10
ELOVL3	48.9437	2.30004	0.338656	6.79166	1.1085e-11	1.22938e-10
KIFC2	2491.62	1.2016	0.176941	6.79096	1.11393e-11	1.2346e-10
MRTO4	4408.89	0.801595	0.118044	6.79066	1.11619e-11	1.23631e-10
TOMM34	6362.15	0.949849	0.140008	6.78427	1.16677e-11	1.2915e-10
WDFY1	8375.71	0.631492	0.0931127	6.78202	1.18506e-11	1.31089e-10
TXNIP	70385	-1.38982	0.204931	-6.78191	1.18601e-11	1.31111e-10
COQ9	6014.18	-0.721503	0.106391	-6.78161	1.18844e-11	1.31294e-10
SPINK7	62.6003	-4.38048	0.646188	-6.77896	1.21042e-11	1.33637e-10
VRK2	2963.91	0.680416	0.100444	6.77408	1.25204e-11	1.38143e-10
DBF4B	1118.98	0.84458	0.124705	6.77261	1.26476e-11	1.39456e-10
SART3	6112.86	0.427144	0.063122	6.76696	1.31514e-11	1.44892e-10
GABRR1	50.4612	4.23324	0.625581	6.7669	1.31574e-11	1.44892e-10
TST	9096.47	-1.33728	0.197628	-6.76665	1.31799e-11	1.45047e-10
CDC25A	1226.14	1.42857	0.211147	6.76578	1.32593e-11	1.45827e-10
BTNL3	1018.94	-3.21532	0.475302	-6.76479	1.33502e-11	1.46733e-10
TMEM92	2032.65	-1.90159	0.28114	-6.76384	1.34381e-11	1.47562e-10
HNRNPA2B1	68962.3	0.553092	0.0817725	6.76379	1.34429e-11	1.47562e-10
USP14	7757.62	0.616147	0.0910987	6.76352	1.34683e-11	1.47747e-10
WDR76	1568.21	1.04119	0.154	6.76096	1.3708e-11	1.5028e-10
EIF3L	29294.2	-0.703386	0.10405	-6.76011	1.37891e-11	1.51073e-10
CCT5	25008.1	0.802013	0.11867	6.75832	1.39596e-11	1.52844e-10
WDR3	3580.79	0.779215	0.115371	6.754	1.4382e-11	1.57368e-10
ASCL2	4546.49	2.52396	0.373782	6.75249	1.45332e-11	1.58922e-10
SRSF1	19358.4	0.473281	0.0700967	6.75184	1.45985e-11	1.59534e-10
CPNE5	1671.67	-1.69478	0.251078	-6.75	1.47846e-11	1.61465e-10
FBXW5	15770.5	-0.604733	0.0896012	-6.74916	1.48703e-11	1.62297e-10
CDH11	9960.68	1.36055	0.201606	6.74858	1.49296e-11	1.62841e-10
RCN1	12290.8	0.977064	0.144804	6.74747	1.50442e-11	1.63987e-10
FAM135B	69.068	-2.93409	0.434878	-6.74693	1.51011e-11	1.64503e-10
TCF20	9867.17	0.743358	0.110191	6.74606	1.51918e-11	1.65386e-10
XXYLT1	2482.17	0.739786	0.109671	6.74549	1.52511e-11	1.65926e-10
LRRC15	2507.58	2.33208	0.345872	6.7426	1.55573e-11	1.6915e-10
BLVRB	8843.29	-1.12613	0.167066	-6.74065	1.57682e-11	1.71334e-10
ZNF765	1501.58	0.849991	0.126121	6.73946	1.58977e-11	1.72632e-10
DMP1	13.2958	3.83171	0.568591	6.73895	1.59541e-11	1.73135e-10
DMRTA2	60.1331	4.38829	0.651204	6.73874	1.5977e-11	1.73165e-10
PTGS1	4359.39	-1.52289	0.225989	-6.73877	1.59736e-11	1.73165e-10
ME1	3158.26	-1.34604	0.199779	-6.73764	1.60976e-11	1.74361e-10
PHLPP2	2395.77	-1.1474	0.170343	-6.73581	1.6302e-11	1.76464e-10
RTN4RL2	452.801	1.47432	0.218919	6.73458	1.64405e-11	1.77852e-10
MZT1	3114.35	1.0014	0.148747	6.73228	1.67031e-11	1.80464e-10
ITGB1BP2	163.262	-1.94948	0.28957	-6.7323	1.66998e-11	1.80464e-10
CDK12	9773.37	0.75513	0.112172	6.73193	1.67432e-11	1.80784e-10
CEBPD	17874.8	-1.14578	0.170235	-6.73058	1.6899e-11	1.82352e-10
STK32B	359.168	-1.64029	0.243756	-6.72924	1.70555e-11	1.83925e-10
GPR155	3727.95	-1.85619	0.275843	-6.72913	1.70684e-11	1.83949e-10
FERMT1	13922.4	1.4861	0.221102	6.72132	1.8008e-11	1.93953e-10
ANPEP	104531	-3.25539	0.484354	-6.72109	1.80365e-11	1.94138e-10
HS2ST1	6099.75	0.682201	0.101523	6.71965	1.82158e-11	1.95946e-10
GCNT2	1196.7	-1.47811	0.220015	-6.71824	1.83937e-11	1.97735e-10
SH3GL2	108.833	-3.21265	0.478268	-6.71727	1.85158e-11	1.98924e-10
GPC2	108.23	1.93094	0.287468	6.71708	1.85399e-11	1.99058e-10
IPO4	9013.83	0.673385	0.100259	6.71644	1.86217e-11	1.99811e-10
TMEM8B	2104.46	-1.05365	0.156903	-6.7153	1.87684e-11	2.0126e-10
MMP10	398.741	2.59687	0.387006	6.71017	1.94403e-11	2.08334e-10
IGFL1	25.7079	4.27485	0.637124	6.7096	1.95163e-11	2.09018e-10
EREG	679.557	2.93538	0.43757	6.70837	1.96814e-11	2.10643e-10
TUBB2A	3488.47	-1.21388	0.180952	-6.70828	1.96926e-11	2.10643e-10
GABBR1	20008.9	1.88987	0.281765	6.70726	1.98317e-11	2.11999e-10
KLC3	338.547	1.83881	0.274192	6.70628	1.99646e-11	2.13287e-10
FKTN	3033.44	0.698884	0.104244	6.70432	2.02342e-11	2.16032e-10
TAF1D	3979.84	0.814228	0.121527	6.69998	2.08449e-11	2.22415e-10
SRPX2	1278.79	1.418	0.211696	6.69826	2.10912e-11	2.24903e-10
STAT1	39131.2	1.14808	0.171453	6.69617	2.13946e-11	2.27996e-10
RANGAP1	11346.9	0.684611	0.102246	6.6957	2.14637e-11	2.28591e-10
MT1E	8260.98	-1.94822	0.290981	-6.69535	2.15158e-11	2.29004e-10
HTR2C	34.586	6.6294	0.990406	6.69362	2.17722e-11	2.31589e-10
DEFA6	2580.8	-6.46524	0.966048	-6.69247	2.19438e-11	2.3327e-10
PSD	2765.41	-2.67082	0.399126	-6.69167	2.20634e-11	2.34396e-10
CCT2	15197.7	0.979606	0.146413	6.69069	2.22128e-11	2.35692e-10
SLC9A4	1622.09	-3.48948	0.521539	-6.69074	2.22046e-11	2.35692e-10
ZZEF1	10253.9	-0.797336	0.119179	-6.69025	2.22784e-11	2.36242e-10
EID3	127.101	-1.08103	0.161596	-6.68969	2.23642e-11	2.37005e-10
ANKLE2	7572.01	0.557984	0.0834238	6.68854	2.254e-11	2.38721e-10
ZNF696	1180.55	0.736467	0.11014	6.68664	2.28356e-11	2.41703e-10
CSPP1	2262.47	0.802714	0.120071	6.6853	2.30449e-11	2.43768e-10
UCK2	5935.75	0.822025	0.122998	6.68323	2.33733e-11	2.47089e-10
HSPA2	2734.77	-1.85217	0.277144	-6.68304	2.3403e-11	2.4725e-10
A2ML1	166.909	3.51989	0.526783	6.68186	2.35931e-11	2.49106e-10
FANCM	764.709	0.783591	0.117297	6.68039	2.38306e-11	2.51459e-10
ERI1	2750.3	1.04416	0.156309	6.68008	2.38813e-11	2.51839e-10
BTNL8	2034.94	-2.61979	0.392223	-6.67933	2.40044e-11	2.52982e-10
SST	1947.94	-4.2011	0.629049	-6.6785	2.41407e-11	2.54262e-10
EIF1B	3847.64	-0.628038	0.0940758	-6.67587	2.45762e-11	2.58532e-10
PCOLCE2	351.367	-2.54203	0.380776	-6.67592	2.45689e-11	2.58532e-10
NFIL3	2955.09	-0.945002	0.141574	-6.67498	2.47269e-11	2.59958e-10
TDRD6	281.805	1.44495	0.216531	6.67316	2.50353e-11	2.63039e-10
PKIG	5008.6	-1.28279	0.192253	-6.67241	2.51635e-11	2.64224e-10
LBP	101.842	3.1527	0.472512	6.6722	2.51991e-11	2.64437e-10
BAMBI	2539.14	2.35277	0.352676	6.67121	2.53697e-11	2.66064e-10
GMPR2	3565.25	-0.53169	0.0797032	-6.67087	2.54286e-11	2.66519e-10
TUSC2	2966.05	-0.587558	0.0880977	-6.66939	2.56866e-11	2.69059e-10
NDEL1	4231.95	-0.537315	0.0805733	-6.66865	2.58171e-11	2.7026e-10
NFXL1	1418.63	0.751151	0.112646	6.66823	2.58913e-11	2.70872e-10
FAM111A	4236.11	0.760684	0.114082	6.66785	2.59583e-11	2.71408e-10
TCERG1	6126.28	0.549969	0.0824989	6.66637	2.62203e-11	2.7398e-10
IGSF11	161.106	-2.56496	0.385007	-6.66211	2.69922e-11	2.81875e-10
KRTAP5-1	91.4467	1.58988	0.238653	6.6619	2.70304e-11	2.82102e-10
KBTBD2	4958.68	0.511343	0.0767871	6.65923	2.75261e-11	2.87101e-10
TBC1D22A	4644.32	-0.569047	0.0854595	-6.65867	2.76318e-11	2.88028e-10
CPSF6	8101.96	0.511365	0.0768095	6.65757	2.78393e-11	2.90016e-10
CALML3	60.1085	4.78722	0.71908	6.65743	2.7866e-11	2.90117e-10
C4orf3	9384.2	-0.724564	0.108853	-6.65633	2.80744e-11	2.9211e-10
KPNB1	29272.6	0.444886	0.0668492	6.65507	2.83161e-11	2.94446e-10
ZFYVE1	2525.53	-0.626623	0.0941634	-6.65464	2.83998e-11	2.95138e-10
CCDC78	189.156	1.62017	0.243498	6.65372	2.85776e-11	2.96806e-10
GCM1	15.9013	3.26269	0.490363	6.65363	2.85956e-11	2.96813e-10
LY6E	46750.9	1.45	0.217955	6.65274	2.87686e-11	2.98428e-10
SLC7A3	60.6004	-3.22666	0.485153	-6.6508	2.91505e-11	3.02208e-10
KCNC3	761.362	1.66771	0.250766	6.65048	2.92148e-11	3.02692e-10
GNG3	86.2628	-1.07703	0.161953	-6.65024	2.92609e-11	3.02986e-10
TMOD1	2936.15	-1.3754	0.206831	-6.64986	2.93364e-11	3.03585e-10
BRK1	11893	-0.609262	0.0916439	-6.64815	2.96808e-11	3.06964e-10
VTI1B	4747.52	-0.469917	0.0706914	-6.64745	2.9822e-11	3.08239e-10
CLCNKA	95.0734	-2.30591	0.346902	-6.64714	2.98833e-11	3.08686e-10
GSG1L	14.6241	-2.41923	0.364063	-6.6451	3.03007e-11	3.12622e-10
ATP13A5	13.1631	-3.18174	0.478808	-6.64513	3.0294e-11	3.12622e-10
UROD	3436.3	-0.648662	0.0976706	-6.64132	3.10882e-11	3.20554e-10
ISG20	3593.64	-1.36347	0.205317	-6.6408	3.11981e-11	3.21494e-10
MAGEC1	35.1157	6.49465	0.978293	6.63876	3.16334e-11	3.25784e-10
SNRPD1	5357.69	0.945954	0.142625	6.63245	3.30154e-11	3.39813e-10
LIN7B	276.275	-0.964382	0.145493	-6.62839	3.39363e-11	3.49082e-10
TBX4	70.0074	3.25544	0.49116	6.62807	3.40111e-11	3.49642e-10
FOXF2	3210.65	-1.82093	0.274874	-6.62462	3.48142e-11	3.57684e-10
FEV	181.167	-3.41176	0.515048	-6.62415	3.4926e-11	3.58618e-10
ST6GALNAC6	3696.83	-1.07272	0.161959	-6.6234	3.5104e-11	3.60231e-10
SPRR2D	52.8902	4.92433	0.743752	6.62093	3.56934e-11	3.6606e-10
DUSP5	3182.23	-1.55386	0.234694	-6.62081	3.57247e-11	3.66162e-10
DNAJC18	981.649	-1.25055	0.188885	-6.62067	3.57563e-11	3.66268e-10
FAM180B	33.3083	-3.1302	0.472847	-6.61991	3.59415e-11	3.6781e-10
ATXN2L	21453.9	0.565645	0.0854465	6.61988	3.59498e-11	3.6781e-10
SUPT16H	12314.1	0.589088	0.0889893	6.61976	3.59782e-11	3.67882e-10
PYGM	995.343	-2.58157	0.389998	-6.61946	3.60512e-11	3.68409e-10
NCBP2	6305.01	0.619459	0.093611	6.61737	3.65643e-11	3.7343e-10
GPD1L	5611.29	-0.938045	0.141767	-6.6168	3.67065e-11	3.7466e-10
NCAM1	2749.19	-2.44123	0.36895	-6.61669	3.67333e-11	3.7471e-10
CLN6	7376	0.848494	0.128318	6.61245	3.78013e-11	3.85376e-10
BST1	760.953	-1.4949	0.226219	-6.6082	3.8901e-11	3.96352e-10
MCM6	6283.45	0.835247	0.126415	6.60719	3.91685e-11	3.9884e-10
CAPRIN1	33034.2	0.581324	0.0879915	6.6066	3.93254e-11	4.002e-10
TBC1D17	5318.35	-0.634867	0.0961398	-6.60358	4.01334e-11	4.08182e-10
CPNE7	795.07	1.96814	0.298139	6.60142	4.07225e-11	4.13928e-10
IL17RB	2314.66	1.46673	0.222209	6.60068	4.09288e-11	4.15779e-10
CDCA8	3238.79	1.27201	0.192757	6.59905	4.13789e-11	4.20103e-10
FABP1	13694.7	-4.37944	0.663817	-6.59736	4.18542e-11	4.24677e-10
FOXF1	5892.91	-1.68263	0.255116	-6.59556	4.23649e-11	4.29604e-10
DSC3	273.88	2.64595	0.40119	6.59526	4.24522e-11	4.30236e-10
TAS2R5	35.7808	1.47257	0.223321	6.59394	4.28315e-11	4.33824e-10
MAGEA10	70.0913	6.60495	1.00203	6.59158	4.35168e-11	4.40505e-10
RNASE7	18.3215	3.68417	0.558958	6.59114	4.36474e-11	4.41567e-10
UTS2	772.25	-1.28427	0.194869	-6.59043	4.38543e-11	4.43398e-10
LRAT	213.692	-3.1463	0.47746	-6.58965	4.40879e-11	4.45498e-10
C19orf31	166.109	1.4163	0.215114	6.58394	4.58144e-11	4.62671e-10
COL4A6	1911.33	-2.74908	0.41755	-6.58383	4.58481e-11	4.62739e-10
THADA	4498.66	0.49889	0.0757763	6.58373	4.58796e-11	4.62785e-10
FCGR1B	67.5328	1.54687	0.234985	6.58285	4.61503e-11	4.65243e-10
PPP1R12C	10501.8	-1.10105	0.167266	-6.5826	4.62302e-11	4.65774e-10
DUS4L	879.33	0.728911	0.110742	6.58205	4.63998e-11	4.67209e-10
PLA2G15	2701.72	0.680865	0.103445	6.58193	4.64391e-11	4.67331e-10
FANCL	2007.49	0.703721	0.106919	6.58181	4.64771e-11	4.67439e-10
RNF207	1591.11	1.17211	0.178134	6.57993	4.70659e-11	4.73084e-10
SCUBE2	1005.73	-1.91703	0.291379	-6.57917	4.73085e-11	4.75244e-10
UBE2S	4168.61	1.29707	0.197168	6.5785	4.75232e-11	4.77121e-10
SMTN	32508.6	-1.9475	0.296061	-6.57803	4.7671e-11	4.78326e-10
ZNF587	6168.37	0.827471	0.125819	6.5767	4.80997e-11	4.82346e-10
AQP2	170.269	3.8649	0.587772	6.5755	4.84884e-11	4.8596e-10
STAMBPL1	1595.73	1.03559	0.157497	6.57533	4.8545e-11	4.86243e-10
UFSP2	2478.94	-0.730885	0.111165	-6.57477	4.87283e-11	4.87794e-10
ING4	1604.58	-0.639816	0.097352	-6.57219	4.95796e-11	4.96028e-10
KLC4	4693.03	-1.14739	0.174612	-6.57107	4.99555e-11	4.99206e-10
PHTF2	2447.69	0.678085	0.103192	6.57107	4.99536e-11	4.99206e-10
MXI1	4444.43	-0.944182	0.14369	-6.57096	4.99936e-11	4.99296e-10
CLCN5	2730.93	1.15642	0.176053	6.56862	5.0783e-11	5.06885e-10
FIBCD1	555.343	3.17975	0.484223	6.56671	5.14381e-11	5.13126e-10
TRPM2	296.87	2.45676	0.374177	6.56576	5.17668e-11	5.16104e-10
MPP4	16.7778	1.96333	0.299031	6.56563	5.18123e-11	5.16258e-10
APOE	35037.1	1.70701	0.260034	6.56459	5.21765e-11	5.19586e-10
LRRC66	941.362	-2.12038	0.323018	-6.56429	5.22829e-11	5.20343e-10
AGBL5	13083.8	-0.940302	0.143283	-6.56256	5.28907e-11	5.26015e-10
FAM83H	30761.2	1.32373	0.201712	6.5625	5.2914e-11	5.26015e-10
DMAP1	2464.8	-0.481856	0.0734762	-6.55799	5.45391e-11	5.41856e-10
UGT2B7	776.345	-3.02253	0.460913	-6.55769	5.46461e-11	5.42605e-10
CHMP6	2451.44	-0.675324	0.102987	-6.55736	5.47686e-11	5.43507e-10
SUZ12	6339.28	0.702473	0.107133	6.55701	5.48976e-11	5.44473e-10
EVI5L	2587.24	-0.765304	0.116731	-6.55612	5.52266e-11	5.47104e-10
ADNP	12441.3	0.623643	0.0951233	6.55616	5.52112e-11	5.47104e-10
PLCL1	808.488	-1.49923	0.228711	-6.55513	5.55925e-11	5.50411e-10
CBX4	5740.59	0.866843	0.132266	6.55376	5.61051e-11	5.55166e-10
TFDP1	13858.6	0.813819	0.124186	6.55324	5.63007e-11	5.5678e-10
ZWINT	4086.63	1.22265	0.186591	6.55257	5.65555e-11	5.58817e-10
PTBP3	23667	0.776708	0.118536	6.55253	5.65717e-11	5.58817e-10
ILVBL	6037.23	-0.783217	0.119551	-6.55132	5.70306e-11	5.63025e-10
APOA2	101.313	4.14886	0.633439	6.54974	5.76376e-11	5.68691e-10
ODF3L1	115.888	-1.6043	0.245037	-6.54718	5.86322e-11	5.78172e-10
OR2B6	12.5132	3.11099	0.475341	6.54475	5.95938e-11	5.87317e-10
UTP6	3573.52	0.626034	0.0956613	6.54428	5.97815e-11	5.88491e-10
GPR108	6898.79	-0.693412	0.105957	-6.54429	5.97807e-11	5.88491e-10
DGKB	211.289	-2.84049	0.434157	-6.54255	6.04803e-11	5.95029e-10
NUDT22	2965.16	-0.773684	0.118261	-6.54218	6.06291e-11	5.96152e-10
C6orf201	649.419	-1.00341	0.153466	-6.53833	6.22084e-11	6.1133e-10
DEFA5	6986.02	-6.59195	1.00825	-6.53801	6.23426e-11	6.12299e-10
RAF1	9476.71	-0.423282	0.0647458	-6.53761	6.25108e-11	6.136e-10
VCPIP1	4228.31	0.598429	0.0915515	6.53653	6.2962e-11	6.17675e-10
TNFRSF25	1016.4	1.3905	0.212767	6.53534	6.34645e-11	6.22249e-10
CD79A	8598.5	-2.66974	0.408537	-6.53488	6.36595e-11	6.23805e-10
LTF	22357.8	-3.36827	0.515844	-6.52963	6.59337e-11	6.45722e-10
PLA2G4E	64.1656	2.62697	0.402394	6.52836	6.6495e-11	6.50847e-10
COQ7	1979.93	-0.526206	0.0806083	-6.52794	6.66813e-11	6.52298e-10
PRR4	732.764	-2.45274	0.375747	-6.52764	6.68152e-11	6.53237e-10
COL23A1	307.723	-1.71996	0.263518	-6.52691	6.7141e-11	6.56048e-10
CHRNA5	752.054	1.20591	0.184831	6.52441	6.82683e-11	6.66683e-10
NDUFB1	3014.85	-0.812991	0.124642	-6.52261	6.90929e-11	6.74353e-10
PDE4C	998.45	-1.88131	0.288436	-6.52246	6.91648e-11	6.74671e-10
LGR6	1728.54	2.69071	0.412714	6.51954	7.05243e-11	6.87542e-10
RBM19	3186.99	0.504831	0.0774431	6.51874	7.08999e-11	6.90811e-10
CENPK	952.438	1.22273	0.187637	6.51646	7.19859e-11	7.00995e-10
2020-03-02	1647.9	-1.0963	0.168288	-6.51442	7.29691e-11	7.10167e-10
HPDL	1667.6	1.71259	0.263035	6.51088	7.47111e-11	7.26709e-10
FUCA1	9084.38	-0.914521	0.140469	-6.51049	7.49083e-11	7.27801e-10
RBAK	4093.53	0.515239	0.0791396	6.51051	7.48962e-11	7.27801e-10
CXCL1	7540.55	2.28353	0.350755	6.51032	7.49912e-11	7.28195e-10
ARRDC4	3980.6	-1.07476	0.16509	-6.5101	7.5099e-11	7.2883e-10
UPK3A	198.101	3.30961	0.508505	6.50851	7.58975e-11	7.36163e-10
MPHOSPH10	3568.73	0.501069	0.0769899	6.50825	7.60321e-11	7.37052e-10
NDUFB10	7885.48	-0.723375	0.111202	-6.50503	7.76794e-11	7.52596e-10
SGCG	41.294	-2.60893	0.401081	-6.50474	7.78273e-11	7.53604e-10
TMC7	1811.53	1.32729	0.20408	6.50379	7.83205e-11	7.57952e-10
LINGO1	1106.82	1.69772	0.261055	6.5033	7.85772e-11	7.60008e-10
SLC2A1	17103.1	1.69864	0.261205	6.5031	7.86819e-11	7.60591e-10
CPSF3	4038.27	0.537074	0.0826032	6.50186	7.93317e-11	7.66442e-10
PLBD2	8670.55	0.68277	0.105057	6.49907	8.08179e-11	7.80361e-10
SNX17	10104.9	-0.514377	0.0791633	-6.49768	8.15692e-11	7.87172e-10
ATP1B2	698.387	-1.90785	0.293636	-6.49732	8.17626e-11	7.88596e-10
ARL6IP4	12119.6	-0.619149	0.095331	-6.49473	8.31831e-11	8.01846e-10
OST4	24268.7	-0.983014	0.151405	-6.4926	8.437e-11	8.12831e-10
TRPV4	583.358	1.67146	0.257454	6.49228	8.45467e-11	8.14076e-10
NUDT16	4331.49	-0.691969	0.106585	-6.49216	8.4613e-11	8.14257e-10
MST1	705.824	-1.85877	0.286352	-6.49121	8.51502e-11	8.18968e-10
CASK	11931.1	0.855972	0.131882	6.49044	8.5585e-11	8.2269e-10
HAVCR2	1529.65	1.25837	0.193938	6.48849	8.6701e-11	8.32951e-10
COX7B	14300.4	-0.889048	0.137036	-6.48771	8.71485e-11	8.36782e-10
ATP6V1B1	103.501	2.09465	0.322897	6.48704	8.7538e-11	8.40052e-10
COX4I1	32913	-0.810871	0.125004	-6.48677	8.76945e-11	8.41083e-10
SRFBP1	1319.69	0.601131	0.0926964	6.48494	8.87649e-11	8.50875e-10
HAUS2	2955.9	0.649294	0.100141	6.48383	8.94216e-11	8.56691e-10
UHMK1	14620.9	0.705805	0.108889	6.48187	9.05917e-11	8.67416e-10
TMEM53	1344.99	-0.925481	0.142813	-6.48035	9.15084e-11	8.75659e-10
HTR7	75.1775	-1.84126	0.284136	-6.48019	9.16056e-11	8.75659e-10
RLIM	7450.49	0.649012	0.100152	6.48024	9.15793e-11	8.75659e-10
ERVMER34-1	572.683	2.6532	0.409471	6.4796	9.19685e-11	8.78606e-10
TYW1	2662.56	0.578059	0.0892133	6.47952	9.20162e-11	8.78606e-10
NOC2L	9665.86	0.740964	0.114366	6.47886	9.24171e-11	8.81944e-10
ELMOD3	1369.42	-0.492598	0.0760478	-6.47748	9.32684e-11	8.89079e-10
R3HDM1	4948.75	0.517037	0.0798206	6.47749	9.326e-11	8.89079e-10
BICD1	1081.82	0.97945	0.151307	6.47325	9.59171e-11	9.13821e-10
ILK	17133.3	-1.02475	0.158324	-6.47252	9.63838e-11	9.17758e-10
CAMTA2	7131.92	-0.575598	0.0889357	-6.47207	9.66703e-11	9.19976e-10
FKBP9	12984.5	0.795862	0.122987	6.47112	9.7279e-11	9.25255e-10
ACSL5	24299.9	-1.54512	0.238841	-6.46921	9.85135e-11	9.36478e-10
MEF2D	12619.5	-0.695158	0.107477	-6.46799	9.93127e-11	9.43553e-10
KY	296.233	-2.41183	0.373018	-6.46571	1.00827e-10	9.57409e-10
CEP170	3057.21	0.948181	0.146664	6.46499	1.01303e-10	9.61397e-10
SCML1	2549.19	1.29704	0.200664	6.46374	1.02143e-10	9.68835e-10
MLH3	1990.59	0.629075	0.0973379	6.4628	1.02784e-10	9.74376e-10
TAC3	289.579	-2.58094	0.399365	-6.46262	1.02902e-10	9.74958e-10
ANGPTL3	53.8746	-2.68176	0.415057	-6.46118	1.03889e-10	9.83761e-10
TMEM33	10891.4	0.727059	0.112585	6.45788	1.0618e-10	1.00491e-09
SMARCA4	18349.4	0.699449	0.108316	6.45746	1.06476e-10	1.00715e-09
JAKMIP2	307.366	-1.88277	0.291703	-6.45443	1.0863e-10	1.02696e-09
ZNF107	1632.48	0.932198	0.14451	6.45074	1.11304e-10	1.05166e-09
TOM1L2	6875.71	-0.864488	0.134083	-6.44739	1.1379e-10	1.07456e-09
ARAP3	2773.92	0.974113	0.151153	6.44453	1.15959e-10	1.09444e-09
ZNF678	1218.1	0.752322	0.11674	6.44441	1.16051e-10	1.09471e-09
RRS1	3890.89	0.860748	0.133574	6.44398	1.16377e-10	1.09718e-09
SPAG4	766.632	-1.50339	0.23333	-6.4432	1.16982e-10	1.10228e-09
SLCO1A2	35.7121	3.74677	0.581595	6.44223	1.17729e-10	1.10871e-09
NR0B2	1924.69	-2.44642	0.37983	-6.44083	1.18819e-10	1.11836e-09
THOC2	10807.3	0.778931	0.120943	6.4405	1.19079e-10	1.12019e-09
ZNF525	1100.71	1.312	0.203725	6.44006	1.19428e-10	1.12286e-09
RPRM	159.733	-2.89846	0.450282	-6.43699	1.2187e-10	1.14519e-09
ANGPT1	818.214	-1.48999	0.23156	-6.43461	1.23794e-10	1.16264e-09
PNRC1	19186.6	-0.75722	0.117684	-6.43433	1.24019e-10	1.16411e-09
MIS18BP1	3029.16	0.693	0.107707	6.43414	1.24176e-10	1.16495e-09
ZNF280A	18.1555	4.57364	0.710897	6.43362	1.246e-10	1.16829e-09
LHX4	89.3622	1.08265	0.168297	6.43296	1.2514e-10	1.17271e-09
SAMM50	5229.91	-0.5669	0.0881279	-6.4327	1.25357e-10	1.1741e-09
HOXA13	1520.12	2.9364	0.456559	6.43159	1.26273e-10	1.18204e-09
C1QL1	532.482	-2.11313	0.328619	-6.43031	1.27341e-10	1.19138e-09
ZFAND5	18068	-0.67455	0.104937	-6.42814	1.29175e-10	1.20788e-09
OIP5	774.311	1.17532	0.182852	6.42768	1.29565e-10	1.21087e-09
SKP1	15926.9	-0.577872	0.0899249	-6.42617	1.3086e-10	1.22231e-09
RCCD1	1586.3	0.815868	0.126979	6.4252	1.31696e-10	1.22945e-09
DPH2	3354.42	0.679627	0.105782	6.42481	1.32034e-10	1.23194e-09
BCAR3	2524.44	-0.90576	0.141038	-6.42212	1.34388e-10	1.25322e-09
DOCK6	8644.43	0.696674	0.108497	6.42116	1.35238e-10	1.26046e-09
CCL14	1873.51	-2.03604	0.317093	-6.42098	1.354e-10	1.26129e-09
TAF4	4740.71	0.776072	0.120918	6.41815	1.3794e-10	1.28425e-09
ATP9B	2675.54	-0.667759	0.104073	-6.41625	1.39674e-10	1.29969e-09
CCNI	22715.6	-0.571986	0.0891486	-6.4161	1.39808e-10	1.30023e-09
U2SURP	11666.8	0.617617	0.096284	6.41453	1.41258e-10	1.313e-09
EIF3B	22598.5	0.650478	0.101423	6.41351	1.42206e-10	1.3211e-09
STK16	2884.8	-0.604529	0.0942662	-6.413	1.42688e-10	1.32486e-09
PPP2R3C	2227.03	-0.439252	0.068496	-6.41282	1.42856e-10	1.3257e-09
SCG5	569.801	-1.73097	0.270049	-6.40983	1.45678e-10	1.35116e-09
NDST3	25.0112	-2.03657	0.317739	-6.40955	1.45945e-10	1.35291e-09
ECI2	3546.33	-0.984176	0.15359	-6.4078	1.47639e-10	1.36787e-09
HOXD10	70.9193	3.66482	0.572007	6.40695	1.48455e-10	1.37469e-09
PABPC1	234830	0.761962	0.118954	6.40555	1.49831e-10	1.38668e-09
IGFL3	12.1085	4.40286	0.68747	6.40444	1.5092e-10	1.39601e-09
KRTAP5-4	12.4031	3.43252	0.535978	6.40421	1.51148e-10	1.39737e-09
MACC1	8783.11	1.4989	0.234061	6.40388	1.51478e-10	1.39967e-09
ACSBG1	85.5598	-1.56069	0.243822	-6.40096	1.54399e-10	1.42588e-09
HSD17B2	6775.92	-2.38176	0.37231	-6.39726	1.58194e-10	1.46015e-09
NRXN1	410.635	-2.94706	0.460782	-6.39578	1.59727e-10	1.4735e-09
NPRL3	6206.25	0.562122	0.0878989	6.3951	1.60439e-10	1.47928e-09
NPHP4	1886.64	0.931565	0.145701	6.39367	1.61955e-10	1.49245e-09
ANGPTL7	190.052	-2.55571	0.399809	-6.39233	1.63381e-10	1.50479e-09
MME	5442.34	-2.75816	0.431569	-6.39101	1.64798e-10	1.51703e-09
ITM2B	85618.1	-0.673827	0.105466	-6.38905	1.66917e-10	1.53571e-09
PRMT3	1913.59	0.71097	0.1113	6.38787	1.68215e-10	1.54434e-09
ZFYVE21	3321.93	-0.65023	0.10179	-6.38799	1.68079e-10	1.54434e-09
FZD2	1565.96	1.37403	0.215098	6.38794	1.68135e-10	1.54434e-09
LHX2	42.9937	1.92979	0.302097	6.38799	1.68075e-10	1.54434e-09
GORAB	1046.12	0.682353	0.106823	6.38771	1.68394e-10	1.54515e-09
UBC	98607.1	-0.529095	0.082836	-6.38726	1.68885e-10	1.54884e-09
LMAN1L	28.0938	-3.36765	0.527306	-6.38651	1.69715e-10	1.55561e-09
ICAM3	3220.74	-1.23254	0.193	-6.38621	1.70047e-10	1.55782e-09
RGS5	46225.6	-1.5016	0.235263	-6.38265	1.74053e-10	1.59367e-09
NEFM	116.663	-2.58799	0.405516	-6.38196	1.74831e-10	1.59995e-09
SUN3	10.8793	3.53478	0.553897	6.38166	1.75175e-10	1.60224e-09
EIF3F	10645.9	-0.594544	0.0931824	-6.38043	1.76586e-10	1.61429e-09
CA2	26946.2	-2.41942	0.379282	-6.37895	1.78307e-10	1.62915e-09
NUP62	10295	0.569163	0.0892351	6.37824	1.79139e-10	1.63588e-09
NUP153	8525.42	0.618846	0.0970353	6.37753	1.79962e-10	1.64253e-09
NAA40	2622.43	0.656207	0.102905	6.37685	1.80764e-10	1.64897e-09
ACTR5	1414.17	0.784483	0.123074	6.3741	1.84046e-10	1.67801e-09
MYB	3349.46	1.77241	0.27813	6.37261	1.85836e-10	1.69344e-09
BAALC	148.351	-1.78796	0.280594	-6.37205	1.86514e-10	1.69871e-09
DHRS2	550.504	2.75072	0.431935	6.36837	1.91051e-10	1.73911e-09
SLC25A32	4045.85	0.610376	0.0958469	6.36824	1.91203e-10	1.73958e-09
UPK1A	20.534	2.85158	0.447809	6.36785	1.91698e-10	1.74315e-09
MIS18A	1526.18	0.918471	0.144275	6.36614	1.93847e-10	1.76176e-09
PDZRN4	1019.15	-2.95963	0.465142	-6.36286	1.98036e-10	1.79887e-09
ACOX1	11652.7	-0.813487	0.127872	-6.36172	1.99513e-10	1.81038e-09
PAIP2	7310.6	-0.586933	0.0922602	-6.36172	1.99504e-10	1.81038e-09
PDILT	106.565	-5.16326	0.811716	-6.36091	2.00559e-10	1.81891e-09
ZNF697	1083.25	0.943648	0.148359	6.36055	2.01033e-10	1.82224e-09
PRIMA1	2184.24	-2.89573	0.45551	-6.3571	2.056e-10	1.86266e-09
TBX19	427.837	0.655178	0.103065	6.35693	2.05828e-10	1.86374e-09
FLVCR2	1065.84	-1.39711	0.219796	-6.35639	2.06549e-10	1.86928e-09
TRAIP	546.038	1.0517	0.16553	6.35352	2.1044e-10	1.90349e-09
SLC43A3	7403.63	1.22227	0.192403	6.35266	2.11627e-10	1.91323e-09
BMPER	326.34	-2.19279	0.345229	-6.35171	2.12936e-10	1.92405e-09
DAZAP2	31892.6	-0.522755	0.0823098	-6.35106	2.13831e-10	1.93111e-09
PRSS33	176.849	2.8646	0.451094	6.35034	2.14837e-10	1.93918e-09
CSDE1	48835.8	-0.601749	0.094786	-6.3485	2.17425e-10	1.96151e-09
CNTD2	232.651	2.41779	0.380919	6.34727	2.19171e-10	1.97622e-09
G2E3	2370.31	0.622518	0.0980831	6.34685	2.19772e-10	1.9806e-09
P4HA1	5244.71	0.969462	0.152764	6.34615	2.20767e-10	1.98853e-09
NUP62CL	332.21	1.72094	0.271248	6.34453	2.23111e-10	2.00859e-09
RNF112	78.8446	-1.58935	0.250558	-6.34322	2.25005e-10	2.02458e-09
ADTRP	2180.54	-2.47067	0.389517	-6.34289	2.25496e-10	2.02793e-09
TNFRSF1A	15153.1	-0.72501	0.114314	-6.34227	2.26401e-10	2.035e-09
CSMD2	412.875	1.63817	0.258301	6.3421	2.26653e-10	2.0362e-09
C3orf80	510.474	1.31262	0.207072	6.33897	2.31301e-10	2.07687e-09
TUBG2	1148.51	-1.04543	0.164939	-6.33828	2.32345e-10	2.08516e-09
CLPB	3107.76	0.690719	0.10898	6.33804	2.32701e-10	2.08726e-09
SECTM1	7677.18	-1.46765	0.231589	-6.33733	2.33778e-10	2.09582e-09
NCR3LG1	1922	1.51435	0.239011	6.3359	2.35955e-10	2.11424e-09
TMEM219	8081.24	-0.690765	0.109083	-6.33247	2.4126e-10	2.16064e-09
LPCAT1	8402.66	1.08774	0.17178	6.33213	2.418e-10	2.16435e-09
OSCP1	497.246	-0.838077	0.132372	-6.33124	2.43193e-10	2.17568e-09
TPR	15572	0.563026	0.0889525	6.32952	2.45928e-10	2.19852e-09
NIP7	3310.19	0.663416	0.104814	6.32947	2.46001e-10	2.19852e-09
SMARCC1	14977.1	0.654636	0.103439	6.32871	2.47224e-10	2.2083e-09
IGFL4	24.4016	3.54792	0.560775	6.32681	2.50274e-10	2.23437e-09
CELA3B	218.18	-3.36009	0.53133	-6.32393	2.54997e-10	2.27536e-09
TOR1AIP1	9399.58	-0.72725	0.115018	-6.32293	2.5665e-10	2.28821e-09
KLF15	756.52	-2.28559	0.361479	-6.3229	2.56704e-10	2.28821e-09
DLG4	1765.74	-0.855935	0.135391	-6.32196	2.58263e-10	2.30091e-09
ZBED4	4710.21	0.665955	0.105348	6.32147	2.59091e-10	2.30709e-09
COX19	2336.39	0.747366	0.118258	6.31979	2.61924e-10	2.33111e-09
KLK4	48.9404	3.69223	0.58425	6.31959	2.62251e-10	2.33281e-09
PRRX1	3619.08	1.54544	0.244624	6.31764	2.65595e-10	2.36134e-09
DCBLD1	2805.73	0.778162	0.123241	6.31413	2.71684e-10	2.41422e-09
XPA	1477.77	-0.678383	0.107455	-6.31316	2.7339e-10	2.42812e-09
BIRC5	3646.34	1.37703	0.218175	6.31159	2.76175e-10	2.45159e-09
EXPH5	2234.75	1.31327	0.208078	6.31142	2.76494e-10	2.45315e-09
DCAF12L1	11.9839	-4.31402	0.683558	-6.31112	2.77016e-10	2.45651e-09
CPLX1	1125.42	1.51283	0.239755	6.30992	2.79185e-10	2.47447e-09
HCRTR1	151.256	-0.55249	0.0875812	-6.30832	2.82078e-10	2.49882e-09
DUSP19	734.956	-1.05387	0.167063	-6.30823	2.82248e-10	2.49904e-09
SLC35E4	1313	1.07188	0.169956	6.30685	2.84763e-10	2.52001e-09
ABAT	2762.71	-1.53897	0.244164	-6.30303	2.91889e-10	2.58173e-09
MAGEA4	211.579	6.88756	1.09289	6.30214	2.93566e-10	2.59523e-09
FAM151A	918.682	-1.2973	0.205937	-6.29949	2.9862e-10	2.63856e-09
SPON2	10329.7	1.23272	0.195722	6.29832	3.00887e-10	2.65721e-09
STIP1	17988.5	0.700739	0.111282	6.29698	3.03499e-10	2.6789e-09
C10orf99	62.0997	5.40386	0.858197	6.29676	3.03939e-10	2.68141e-09
PRIM1	1155.66	0.896651	0.142416	6.29602	3.0538e-10	2.69274e-09
SCUBE1	939.943	-1.93658	0.307615	-6.29547	3.06461e-10	2.70088e-09
FBXO7	10205.2	-0.421496	0.0669661	-6.29417	3.09054e-10	2.72234e-09
CADM3	1084.25	-2.5952	0.41248	-6.29171	3.13987e-10	2.76437e-09
NUP98	14783.6	0.546164	0.0868184	6.29088	3.15672e-10	2.77778e-09
POU5F1B	16.8639	2.68215	0.426492	6.28887	3.19788e-10	2.81256e-09
SCGB2A1	283.17	-3.69955	0.588732	-6.28393	3.30121e-10	2.90195e-09
TCF3	12681.6	0.779667	0.124123	6.28141	3.35512e-10	2.94783e-09
MAK16	2949.94	0.678766	0.108092	6.27951	3.39646e-10	2.98263e-09
TMEM236	80.0642	-2.86078	0.455621	-6.27886	3.41054e-10	2.99346e-09
TP53INP2	10198.9	-1.09093	0.173784	-6.27747	3.44124e-10	3.01886e-09
ACTR1B	6816.49	-0.496401	0.0790884	-6.27654	3.46188e-10	3.03543e-09
TGM1	140.609	1.94308	0.309587	6.27638	3.4654e-10	3.03695e-09
ETV6	8944.7	0.518827	0.0826816	6.27499	3.49653e-10	3.06267e-09
AURKB	2230.15	1.37101	0.218535	6.27362	3.52741e-10	3.08815e-09
COX14	2856.48	-0.635184	0.10125	-6.2734	3.5325e-10	3.09102e-09
FAM111B	1895.05	1.41657	0.225875	6.27148	3.57621e-10	3.12739e-09
RERG	1945.16	-2.05673	0.327954	-6.2714	3.5782e-10	3.12739e-09
ZNF587B	1173.54	0.784207	0.125046	6.27134	3.57952e-10	3.12739e-09
POLG2	563.594	0.627408	0.100056	6.27057	3.59726e-10	3.14129e-09
MT1A	4546.82	-1.44476	0.230417	-6.27018	3.60623e-10	3.14752e-09
GABPB1	2171.93	0.459014	0.0732127	6.2696	3.61971e-10	3.15768e-09
LHPP	3062.01	-1.17836	0.187956	-6.26937	3.62516e-10	3.16083e-09
MYL9	129262	-2.32461	0.370942	-6.26677	3.68606e-10	3.2123e-09
PAIP2B	793.545	-1.53682	0.245249	-6.26638	3.69544e-10	3.21884e-09
PKHD1L1	177.644	-2.00508	0.320077	-6.26436	3.74353e-10	3.25907e-09
BUB3	12068.8	0.670067	0.106981	6.2634	3.76683e-10	3.27769e-09
PIK3AP1	6031.81	1.23558	0.197272	6.2633	3.76905e-10	3.27797e-09
TIPARP	4415.93	-0.837119	0.133677	-6.26225	3.79455e-10	3.29847e-09
RCAN2	4789.76	-1.85609	0.296405	-6.26201	3.80052e-10	3.30199e-09
EPHA6	85.0944	-3.00153	0.479387	-6.26119	3.82046e-10	3.31764e-09
SLC39A6	5758.95	0.721935	0.115324	6.26005	3.84846e-10	3.34026e-09
MDM2	12200.1	1.11451	0.178045	6.25971	3.85703e-10	3.34601e-09
SMPDL3A	3049.02	-1.26954	0.202816	-6.25956	3.86062e-10	3.34743e-09
DKK2	444.61	1.8329	0.292837	6.2591	3.872e-10	3.3556e-09
EAPP	3563.61	-0.526193	0.0840894	-6.25755	3.91077e-10	3.38749e-09
CTSB	144539	1.0756	0.171938	6.25577	3.95557e-10	3.42457e-09
RAB37	639.506	-1.5195	0.242921	-6.25511	3.97229e-10	3.43731e-09
ABCD4	2686.81	-0.538016	0.0860549	-6.25201	4.05194e-10	3.50447e-09
ANKS6	3900.3	0.739315	0.118282	6.25047	4.09224e-10	3.53754e-09
OSBPL7	4016.83	-1.17616	0.188225	-6.2487	4.13871e-10	3.57591e-09
NUFIP1	1090.8	0.692019	0.110751	6.24843	4.14606e-10	3.58046e-09
ZNF114	89.2678	2.39205	0.382927	6.24676	4.19046e-10	3.61698e-09
CCDC166	5.2092	3.84756	0.616666	6.23929	4.39557e-10	3.79212e-09
GLS2	582.144	1.22791	0.196808	6.2391	4.40086e-10	3.79477e-09
HCAR1	402.449	1.49313	0.239343	6.23847	4.4187e-10	3.80824e-09
PMVK	3757.54	-0.687611	0.110233	-6.2378	4.43778e-10	3.82277e-09
IKBIP	1692.8	0.78101	0.125252	6.23551	4.50319e-10	3.87717e-09
KIF1C	25568.4	-0.621657	0.0997137	-6.23441	4.53473e-10	3.90237e-09
GPR25	230.698	-2.02488	0.324826	-6.23372	4.55478e-10	3.91766e-09
ZBTB16	980.334	-2.4547	0.393818	-6.23308	4.57344e-10	3.93174e-09
PAXIP1	3118.03	0.576808	0.0925451	6.23273	4.5839e-10	3.93876e-09
[truncated: 15,170 more rows]
