# Supplementary material for: A Pipeline to Call Multilevel Expression Changes between Cancer and Normal Tissues and Its Applications in Repurposing Drugs Effective for Gastric Cancer
Source: Biomed Res Int. 2020 Aug 5;2020:3451610. doi: 10.1155/2020/3451610 (PMC7428949; doi:10.1155/2020/3451610)
Supplement: Supplementary 3 — Supplementary Table 3: drug perturbation-induced gene expression signatures and expression differential gene intersection information. [file 3451610.f3.xlsx]

## Sheet: result
drugs	background_genes	drug_genes	overlap	overlap_up	overlap_up_genes	up_pvalue	overlap_dn	overlap_dn_genes	dn_pvalue
drug:P4011:17beta-estradiol|streptomycin|penicillin|puromycin|dextran|medroxyprogesterone acetate-up	16984	406	359	63	FN1 COL3A1 SERPINE1 SPARC TIMP1 CTSK IFITM1 LUM IFITM3 THY1 COL6A3 RPL7 CTSB IGFBP7 MDK DKK1 FAP LOX COL4A2 LAMB1 CLTC YTHDF1 TAF1D TM4SF1 BTG3 ANXA2 RCN1 TSPAN6 TRIP6 PRRC1 CTTN SERPINH1 OSR2 DVL3 NFAT5 LOXL2 CALU CTHRC1 TGFBI CANX CORIN CNOT2 PLEC DNMT3L MXRA8 ELK1 STAM PXDN CD44 WDFY1 MMP14 CTSC PTK7 PCOLCE PLS3 CDH13 TRIM28 SPON2 MYOF CERS5 FDXR NNMT EXOC1	1	172	CDKN1A ZFP36L1 FHL2 RPL32 RPS11 CYB5R3 CD63 TAGLN RPS24 RPL13 UBC EIF3L TXNIP DSTN LRP10 ATP6V0E1 MAMDC2 TPT1 EEF2 LGALS3 RPL27A IGFBP6 TCEAL2 RPL37A RPS13 RPL18A TOMM7 FTH1 PCBP2 RPL18 TMEM59 MYL6 RPL6 RPLP1 RPS9 GUK1 VEGFB CD59 MFAP4 TPM2 B2M POLR2L RPL27 TBX3 GSN ITM2B RPS25 COX7C NPTX1 ZFAND5 CD81 RPL34 RPL5 MYL9 EIF4A2 GADD45A HCFC1R1 TMEM14C PSMB6 PGRMC2 NSA2 TMEM98 RPS27A CLEC3B EEF1B2 ADI…	0
drug:P4010:17beta-estradiol|progesterone|streptomycin|penicillin|puromycin|dextran|medroxyprogesterone acetate-up	16984	341	310	58	FN1 COL3A1 CTSK SPARC TIMP1 OSR2 LUM IFITM3 CTSB IFITM1 MDK DKK1 RPL7 THY1 FAP COL6A3 SERPINE1 IGFBP7 LAMB1 COL4A2 TSPAN6 ANXA2 CTTN CTHRC1 MXRA8 LOX TRIP6 RCN1 TGFBI NFAT5 DVL3 SPTAN1 CLTC SOX4 SERPINH1 TMEM200A FBN1 PXDN TUBA1C SH3BP4 PLS3 SKIL CALU CD44 PTK7 BTG3 CORIN LBH MYOF CDH13 ADAM9 PLEC CANX CRABP2 OLFML2B SPON2 PCOLCE CNOT2	0.999998	154	ZFP36L1 FHL2 TCEAL2 CYB5R3 CDKN1A CD63 TAGLN RPS24 LRP10 DSTN ATP6V0E1 RPS11 LGALS3 EIF3L RPL13 RPL32 DDX5 DYNLL1 RPL37A UBC EEF2 MAMDC2 IGFBP6 TMEM98 PCBP2 FTH1 MYL6 RPL27A TMEM59 SGK1 CD59 GSN CLEC3B MFAP4 RAMP1 TPM2 HCFC1R1 MATN2 CD81 ADI1 EMP3 B2M TBX3 VEGFB RPL6 RPS9 TCEAL4 CRYAB POLR2L RAB23 ITM2B EDF1 CALM2 NSA2 PSMB6 MYL9 MXRA7 RPL18 TXNIP RPL27 F10 ZBTB4 TSC22D1 ARL6IP5 TMEM14C TCEAL8 GU…	0
drug:P5629:water-up	16984	495	413	67	FBL CLDN7 ACP5 PLA2G2A RPL7 ANXA2 HSPA5 RPN2 CCL20 RRBP1 RBM8A MMP7 ENO1 PRMT1 PSMD2 PSMB2 ITGB4 ARPC1B POMP PDCD5 MIF ACLY MRPL30 BGN PFKP SQLE KRT7 GANAB CLDN4 GLRX3 CDK1 AKAP8 TCP1 HMGB2 NOP16 SLC16A3 GJB2 PARP1 IFITM1 SLC5A6 PSMD1 SPTAN1 PDIA3 TAMM41 CLN6 VCAM1 BST2 PSMA1 IGFBP7 CCDC58 KDR S100A10 NUP133 LACTB DDX39A HSPD1 DNAJC9 PTTG1 PGK1 HSP90B1 SERPINH1 ATP6AP1 EBNA1BP2 TCF19 NPM1 MRTO4 A…	1	195	KRT20 TSPAN1 ZG16 TMIGD1 MSMO1 CLCA1 UBC NDUFB8 LGALS3 RPL32 MYL6 SCT RPL26 DNASE1 LGALS4 ACTB RPL11 RPL13 SLC44A4 MEP1B AGR2 FAM3D RPL36AL COX6A1 SSR4 RIPK3 EEF1D TMPRSS2 RPS11 PPP1CA CDHR5 SOD1 CHCHD2 PLAC8 RPS3A RAMP1 DPEP1 RPS8 PYY TMEM54 FUCA1 SCP2 RPL31 BCL2L15 RPS15A UBA52 DDX5 RPL10 SEC61B RPL18A B2M RPL18 RPL6 SDHB NDUFA5 RPLP1 NDUFA12 SLC3A1 SEC11C NDUFB4 RPL27 RPLP2 SUCLG1 AKR1A1 ORMDL…	0
drug:P5628:phlorizin|D-glucopyranose|streptozocin-dn	16984	584	435	75	HSD3B7 ELOVL3 HRG PLG APOE APOF CYP1A2 RBP4 F2 CRP C3 RPL7 SLC22A1 HSPD1 C4B PAH AHCY SERPINF2 ITIH2 SLC38A4 HAMP APOC1 INO80 AHSG NIT2 LAMP2 PYGL AMACR IFITM3 APOA2 PROC PGK1 ITIH1 AQP9 KNG1 AGT HSPA1B FMO1 RNF149 RCL1 CREG1 ASGR1 IGFBP1 C9 CFHR1 PSMA4 SERPINA10 GJB2 DNAJA1 PPA1 POMP HP C1QBP PNPO CCT6A LACTB2 SDS TUBA1B CHDH ABCB11 F5 SLC25A13 SERPINA6 COL18A1 HSP90AB1 HAL CLDN12 MLXIPL FETUB G…	1	220	LGALS9 PHYH EEF1A1 EPHX2 HERPUD1 FBP1 ALDH1A1 CYB5A GNMT ERRFI1 CTH DUSP1 HPD G6PC PLIN2 PGRMC1 TAT RPL4 OAZ1 B2M NDUFA1 INMT CLU MSRB1 RPS29 AKR1A1 RPS27A STARD10 FTH1 RPLP1 RGN RPL10 OAT ETFA RPL3 GSTZ1 EPHX1 AADAC NACA ALDOB COX5A BHMT APOA4 RNASE4 NR0B2 RPS23 HSD17B2 ADH4 CDO1 CHCHD10 COX6B1 ETFB SELENBP1 COX6A1 COX4I1 ACADM LEAP2 RPL31 RPLP2 MARC2 UQCRB C8G SDHB MAOB SAR1B DNAJB9 UBA52 PNPLA…	0
drug:P825:cobamide-up	16984	443	324	48	APOA2 APOE PAH C3 APOC1 RBP4 AHCY AHSG PLG MAT1A HRG HP IFITM3 F2 APOF HAMP SERPINA6 KNG1 SLC38A4 FASN AGT SDS CYP1A2 ITIH2 GLS2 PROC FETUB SERPINF2 INO80 COL18A1 SREBF1 RPL22L1 ASGR1 IGFBP1 GRN FADS2 SERPINA11 PYGL C1QBP HAL F5 BST2 APOH HSPD1 MARC1 SERPINA10 PGK1 SFXN1	1	166	APOA1 ALDOB FABP1 HPD FBP1 TTR FGA EEF1A1 KXD1 APOC3 GNMT B2M BHMT FTH1 SERPINC1 INMT RPS29 PHYH RNASE4 RPL10 CHCHD10 CHCHD2 UBA52 GOT1 CLU SULT1A1 SDHB RPL3 COX6B1 CAT ACSL5 TAT TTC36 SELENBP1 RPLP1 RPL4 PGRMC1 MARC2 FAU SLC2A2 RPL13 COX6A1 RPLP2 DBI COX4I1 CYB5A RPL18A SLC37A4 RPL27A OAT STARD10 UQCR11 HEBP1 ALAD KHK LGALS9 SAR1B C8G RGN RPS15 RPS23 RPS11 NDUFV3 RPS5 ETFA G6PC QDPR UBC PM20D1 B…	0
drug:P4806:N(6)-(1-carboxyethyl)-L-lysine|ochratoxin A-up	16984	377	309	36	CDH16 ENO1 CTSB DAO TUBA1B GNS TUBA1C GRN PMEPA1 LRP2 AQP2 SLC22A6 OPLAH DDAH1 GRINA IGF2R ATP6AP1 DAB2 ACP5 PLAU FMO1 MIF ANXA2 SPP1 TUBA1A CD24 SERPINH1 LOXL1 ARPC1B PSMA7 HNF1B TOMM20 SPARC S100A10 C1QBP EIF3B	1	160	GPX3 MT2A AKR1A1 CD63 ACY1 DNASE1 UQCR11 COX8A SLC25A3 AKR7A3 SLC25A5 HSD11B2 ATP6V0C FABP3 CST3 COX4I1 NDUFB4 UBB MDH1 RPLP2 AGXT2 MGST3 PTTG1IP ALDOB NDUFA4 SLC6A8 SLC3A1 NDUFB2 PPP1R1A ITM2B FTH1 RPS14 RPS27A AKR7A2 GABARAP AMN GGT1 SLC25A4 MT1A RPL31 GPX4 MGLL ALDH1A1 CRTAP RPS11 RPL11 TCN2 RPL9 PRDX2 CSRP2 CKB CRYAB RPL6 COX5B RPL10A GDE1 PEBP1 COX7A2 RPL13A SDHA IDH3G TXNIP HIGD2A FBP1 SOST…	0
drug:P4804:ochratoxin A-up	16984	425	347	40	CDH16 ENO1 LRP2 GNS CTSB DAO TUBA1B TUBA1C DAB2 PMEPA1 FMO1 SLC22A6 GRN AQP2 DDAH1 HSP90AB1 GRINA PLAU CALB1 SPP1 CD24 OPLAH IGF2R ACP5 TUBA1A SERPINH1 MIF ATP6AP1 EIF3B TOMM20 ANXA2 NUDT4 HNF1B HSPD1 ARPC1B YWHAZ PAH C1QBP PSMA7 SPARC	1	182	GPX3 AKR1A1 CD63 ACY1 SLC3A1 MT2A SLC25A3 UBB AKR7A3 UQCR11 DNASE1 COX8A AGXT2 HSD11B2 MDH1 SLC25A5 ATP6V0C ALDOB RPS29 NDUFB2 COX7A2 COX4I1 FBP1 ALDH1A1 CRYAB FTH1 RPS14 ITM2B PTTG1IP SLC6A8 RPLP2 RPL9 NDUFB9 MGST3 RPS27A CST3 NDUFB4 AKR7A2 NDUFA4 TCN2 RPS11 PPP1R1A RPL18 MT1A GGT1 GLUL RPL29 FABP3 GPX4 AMN RPL11 RPL31 RPS8 GABARAP SLC22A2 RPL26 RPS13 RPL6 AP2M1 RPS23 CRTAP PRDX2 RPL13A SLC25A4 …	0
drug:P4808:ochratoxin A-dn	16984	538	430	67	AGT POMP RBP4 KNG1 AHCY TUBA1C ASGR1 AQP9 DHCR7 C4BPA HSP90AB1 ENO1 SERPINA10 TUBA1B PSMD11 GRINA PSMB2 PAICS PSMD2 CYP1A2 IGFBP1 APOH FMO1 SLCO1A2 DPYS PROC CALU GNE SRD5A1 DAO ABCB11 TRAP1 MORF4L2 HSD3B7 DHFR FKBP4 FKBP1A RPN2 TAP1 CTSB MIF CTSC LIPC F2 PSMA7 EIF3B GNS KCTD13 GRN AHSG BAAT KMO KRT18 PDIA4 ADK CMTM6 YWHAB DIO1 TP53 OPLAH DPP3 YWHAG GM2A EHMT2 CBFB LEMD2 C4B	1	208	EPHX1 UBC CLU APOM GSTA5 METTL7B FAU PLIN2 FBP1 NDUFB4 UBB TAT APOA1 F10 GSTM1 PCK1 NDUFA3 CTH COX8A G6PC COX4I1 GSTA1 AKR7A3 TPT1 RPS9 NDUFB9 RPS14 ALDH1L1 SOD1 COX7A2 RPL10 MGST3 RPLP2 RPL31 FABP1 NDUFB2 DBI MDH1 CRIP2 APOA4 ALDH2 SLC25A5 KHK UBA52 NDRG2 GLUL RPS8 AKR1A1 RPS11 B2M COX5B RPL11 RPL18A TTC36 SULT1A1 NUCB1 P4HB RPS29 RPS27L MST1 NDUFV2 RPL36 RPL6 RPS23 SLC25A1 DYNLRB1 INSIG1 UGT2B1…	0
drug:P4809:ochratoxin A-dn	16984	334	267	31	FASN ENO1 DHCR7 TUBA1C HSD3B7 KRT18 POMP GRN GRINA MIF KNG1 RBP4 SREBF1 CTSB ASGR1 ACLY TUBA1B EIF4EBP1 PSMB2 PSMD11 FKBP1A DAO TAP1 TP53 FKBP4 OPLAH DPP3 NUTF2 G6PD KCTD13 PSMD2	1	145	HBA2 HBB FAU EPHX1 PLIN2 COX8A MGST3 UBA52 CTH RPLP2 GSTM1 BHMT COX4I1 TTC36 APOM KHK RPS14 NDUFA3 SLC25A1 NDUFB4 PFN1 ALDH1L1 RPL18A COX5B RPS9 OAZ1 NDUFS7 GAMT PEBP1 APOC3 COX7A2 TST DBI RPS29 RPL11 RPL36 G6PC RPS13 RPL10 RPL31 ALDH2 METTL7B GSTA5 GPX4 HAAO GSTA1 RPL18 RPL15 NDUFB2 LGALS9 RPS5 NDUFB9 GCKR TSC22D1 CRIP2 AKR7A3 UQCR11 RABAC1 TPT1 HSD17B6 RPS27L ALDH1A1 RPL27A RPS11 ARFGAP2 SLC22A…	0
drug:P5549:inhibitor|protein polypeptide chain-up	16984	311	251	32	GAD1 PPP1R1B VSNL1 SLC39A10 SQLE PPP3CA STMN1 MAP2K1 ARL6IP1 ENC1 SYNPR PRPS1 BLOC1S2 ATP6V1A TUBA1A DNM1 COCH HSPH1 LRP11 DNAJA1 PCNA PSMC4 S100A5 TCP1 NIPA1 PSMA4 HOPX DOC2A CTNNB1 TOMM20 DZANK1 CACYBP	1	134	EIF4A2 HPCA CAP1 PENK SCG5 NDRG4 UCHL1 CALM2 PDE1B RABAC1 RHOB PRNP CHCHD2 SERINC1 RPS14 ACTB RTN1 STMN2 VIP PPP1CC RGS4 UQCRC2 ZCCHC18 NRN1 SCN4B ARL6IP5 GOT1 ATL1 AMPH LMO3 RIMS1 PCBP1 RPL23A ELMOD1 SRSF5 PPP1CA OLFM1 SGK1 NDUFB6 COX5A CELF4 CNR1 KCNAB1 MAPK3 PDE2A PTK2B CHCHD10 SCG2 NACA FBXW7 CAP2 ATP6V0E2 WBP2 DSTN CACNA2D3 SDHB RPRM CALY PCP4L1 VAMP2 AURKAIP1 NECAP1 ITFG1 RPS5 ALAD JUN DYNC…	0
drug:P5540:inhibitor-up	16984	451	353	42	INO80 TUBA1A CRYM VSNL1 HSP90B1 HOPX SSBP4 RPL22L1 SERPINE2 TOMM20 PTTG1 HSPH1 ATP6V1A SNRPE SYNPR KCNAB2 RPL7 PSMA4 TRIM32 TMEM87A MORF4L2 DNAJA1 PLA2G7 SLC39A10 HSPA5 SRP9 DNM1 POMP CACYBP MBOAT2 ICAM5 NAA20 RASGEF1A KCNJ10 NAA38 CLSTN1 ARGLU1 RNF145 EPHX4 TBCE EEF1E1 LUC7L3	1	196	SCG5 NNAT RPL31 RPS14 LY6H ITM2C CST3 ATP6V1D COX6A1 RPL26 RPS15 FTH1 EIF4A2 AMPH CKB TUBA1A RPS23 RPL10 RPL23A RPL13 UCHL1 MT3 SERINC1 PEBP1 EEF1B2 CHCHD2 SDHB VAMP2 NPTN GPX4 RHOB NDUFA4 LMO3 COX4I1 RPL11 RPLP2 UBE2E1 GOT1 HINT1 STMN2 FAU COX7A2 SST UQCR11 SPARCL1 GABARAP NDUFA1 RPLP1 VTI1B NRSN1 RABAC1 FKBP8 AHCYL1 PRNP NDUFC1 NACA PPP1CC NPY PCBP1 PRDX5 WBP2 EIF1B SGK1 RPL10A FKBP2 TTR RPL4 M…	0
drug:P2812:hormone-dn	16984	387	301	19	MIOX MIF CYP7B1 ASS1 CXCL1 SOD2 S100A11 POMP SPP1 SLC6A6 SNRPG MRPL42 SLC22A1 DAO NCEH1 ENO1 CDK5RAP1 MRPS30 MRPL30	1	173	GADD45G COX8A UBB RPLP1 NDUFA1 UQCR10 COX6A1 GUCA2B EGR1 COX5A COX6B1 UQCRH UQCR11 PARK7 DNASE1 RPL36AL NDUFA4 HINT2 RPS27L HINT1 ZFP36 TIMM8B NDUFA3 COX7C DUSP1 FTH1 NDUFA2 GPX3 MYL6 SGK1 UBL5 ANAPC13 RPS14 RPL37A INMT NAT8 FAU RPS20 KRTCAP2 BDH2 AKR1A1 NDUFC1 NDUFB8 TMBIM6 RPL34 RPS13 RPL23A RPL9 RPS8 RPS15 SOD1 DAD1 TTC36 NDUFS7 NDUFA6 RPL27 NDUFB3 COX5B NDUFA7 KHK G6PC EDF1 SELENBP1 HIGD2A PS…	0
drug:P4824:ochratoxin A-dn	16984	451	368	40	CDH16 ENO1 TUBA1B TUBA1C SLC22A6 LRP2 DAO GNS GRN FMO1 PMEPA1 CTSB DAB2 POMP AQP2 HSP90AB1 MIF DDAH1 PLAU HNF1B GRINA CALB1 SLC22A13 OPLAH TUBA1A CD24 GJB2 DIO1 PSMA7 IGF2R EIF3B ATP6AP1 KCTD13 ANXA2 NUDT4 HSPD1 SPP1 C1QBP HGS ACP5	1	198	GPX3 ACY1 AKR7A3 UBB COX8A CD63 SLC3A1 AKR1A1 RPS29 HSD11B2 COX4I1 UQCR11 DNASE1 NDUFB2 FTH1 RPLP2 SLC25A5 CRYAB UBC ATP6V0C SLC25A3 RPS14 AGXT2 MDH1 COX7A2 FBP1 GGT1 PTTG1IP FAU UBA52 GPX4 MGST3 NDUFB4 CST3 NAT8B SLC22A2 GLUL RPL18A RPL31 PPP1R1A NDUFB9 AKR7A2 RPS11 ALDH1A1 MT2A FABP3 RPL29 RPL9 RPS27A ABHD14B RPL36 APOM COX5B MT1A MGLL RPL11 ACO1 RPS5 ALDOB PEBP1 RPL10A RPS23 PRDX2 RPL18 AP2M1 …	0
drug:P4825:ochratoxin A-dn	16984	405	327	32	CDH16 ENO1 TUBA1B TUBA1C SLC22A6 LRP2 DAO GRN GNS PMEPA1 DAB2 FMO1 MIF CTSB AQP2 PLAU GRINA DDAH1 HNF1B CALB1 SLC22A13 POMP OPLAH CD24 TUBA1A IGF2R GJB2 KCTD13 SPP1 ANXA2 PSMA7 ATP6AP1	1	177	GPX3 ACY1 COX8A AKR7A3 SLC3A1 CD63 AKR1A1 HSD11B2 RPS29 UQCR11 COX4I1 DNASE1 RPLP2 NDUFB2 CRYAB UBB FTH1 ATP6V0C MGST3 FAU RPS14 UBA52 AGXT2 GGT1 SLC25A3 COX7A2 MDH1 GPX4 CST3 RPL18A SLC25A5 SLC22A2 PTTG1IP NAT8B PPP1R1A NDUFB4 RPL31 AKR7A2 PEBP1 FABP3 ALDH1A1 RPS11 RPL10A NDUFB9 GLUL COX5B RPL29 RPL36 FBP1 MGLL RPS27A RPS5 RPL18 RPL9 RPL11 PRDX2 OAZ1 KHK NDUFA3 ABHD14B UBC ACO1 APOM MT2A HIGD2A …	0
drug:P4826:ochratoxin A-dn	16984	405	330	34	CDH16 ENO1 TUBA1B SLC22A6 LRP2 DAO GNS GRN PMEPA1 TUBA1C DAB2 AQP2 FMO1 CTSB MIF PLAU HNF1B CALB1 DDAH1 SLC22A13 CD24 TUBA1A OPLAH GJB2 GRINA POMP IGF2R ANXA2 SPP1 KCTD13 DIO1 ACP5 ATP6AP1 NUDT4	1	170	GPX3 ACY1 AKR7A3 SLC3A1 COX8A CD63 HSD11B2 AKR1A1 DNASE1 RPS29 UQCR11 CRYAB NDUFB2 UBB AGXT2 MDH1 RPLP2 GGT1 SLC25A3 SLC25A5 ATP6V0C FTH1 SLC22A2 COX7A2 PPP1R1A RPL31 PTTG1IP CST3 NAT8B COX4I1 FABP3 NDUFB4 NDUFB9 RPS14 GPX4 RPS27A MGST3 FAU AKR7A2 RPS11 RPL9 PEBP1 MGLL FBP1 GLUL ALDH1A1 MT2A RPL29 UBA52 COX5B ACO1 RPL11 PRDX2 SOSTDC1 NDUFA4 SCAMP2 SLC6A8 UBC MEP1A AP2M1 NDUFA3 MAP1LC3A CSRP2 PPP1…	0
drug:P4821:ochratoxin A-dn	16984	392	320	37	CDH16 ENO1 SLC22A6 TUBA1B LRP2 DAO GNS PMEPA1 GRN TUBA1C AQP2 FMO1 PLAU DAB2 CALB1 DDAH1 SLC22A13 HNF1B MIF CTSB POMP GRINA TUBA1A OPLAH CD24 HSP90AB1 IGF2R GJB2 ANXA2 SPP1 KCTD13 NUDT4 ATP6AP1 ACP5 EIF3B DIO1 HSPD1	1	167	GPX3 ACY1 SLC3A1 AKR7A3 CD63 COX8A AKR1A1 HSD11B2 RPS29 UBB DNASE1 UQCR11 NDUFB2 GGT1 CRYAB AGXT2 COX4I1 ATP6V0C SLC25A3 FTH1 RPLP2 MDH1 COX7A2 SLC25A5 NAT8B SLC22A2 PPP1R1A FBP1 NDUFB4 CST3 ALDH1A1 PTTG1IP UBC MT2A RPS14 FAU FABP3 GLUL AKR7A2 GPX4 RPL9 NDUFB9 MGLL RPL31 RPL29 MGST3 RPL10A RPL18A RPS11 RPS27A ACO1 PRDX2 MEP1A CSRP2 MT1A PPP1CA UBA52 MAP1LC3A ACSM2A SOSTDC1 PEBP1 GDE1 AP2M1 HIGD2A…	0
drug:P4823:ochratoxin A-dn	16984	289	233	31	SLC22A6 DAO FMO1 SLC22A13 LRP2 AHCY ASS1 GRINA PAH GJB2 HNF1B CDH16 DIO1 MIF AMACR PMEPA1 PREP KMO RNASEH2A PLAU CALB1 AGT DAB2 SLC25A30 SLC12A7 SLC15A2 DPYS F2 DHCR7 ASGR1 PROC	1	127	GPX3 ACY1 AKR7A3 SLC3A1 NAT8B TTC36 SLC22A2 PCK1 ABHD14B HAAO UBB HSD11B2 RPS29 SPINK1 GAMT APOM GGT1 FBP1 TMBIM6 OAT ALDOB GLUL MDH1 COX8A METTL7B GSTA1 TST MEP1A KHK CRYAB GSTA5 PDK2 AKR7A2 HAGH GPX4 RESP18 BLVRA FTH1 EPHX1 SLC37A4 MAP2K2 SLC25A5 USE1 ALAD RPL29 GSTO1 HBA2 ACSM2A ANPEP NDUFS7 SOD1 TXN2 SLC25A11 PRSS8 SLC2A5 CTH AKR1A1 LDHD ALDH1L1 HBB SLC22A18 FUCA1 RPL26 ESPN ACO1 IVD MEP1B GR…	0
drug:P4828:ochratoxin A-up	16984	431	354	43	CDH16 ENO1 LRP2 CTSB GNS DAO TUBA1B TUBA1C SLC22A6 DAB2 PMEPA1 GRN FMO1 DDAH1 AQP2 PLAU GRINA HSP90AB1 SPP1 OPLAH CALB1 IGF2R MIF CD24 ACP5 TUBA1A ATP6AP1 EIF3B SERPINH1 POMP TOMM20 ANXA2 HNF1B PAICS SLC22A13 NUDT4 PSMA7 C1QBP KCTD13 ARPC1B PSMD2 YWHAZ SPARC	1	185	GPX3 ACY1 CD63 AKR1A1 SLC3A1 AKR7A3 SLC25A3 COX8A FBP1 RPS29 MT2A ATP6V0C UQCR11 DNASE1 COX7A2 HSD11B2 AGXT2 NDUFB2 MDH1 SLC25A5 UBB ALDH1A1 RPS14 RPLP2 UBC NDUFB9 NDUFB4 FTH1 CRYAB RPS11 RPL31 RPL9 CST3 RPS27A COX4I1 PTTG1IP RPL18 ALDOB GLUL SLC6A8 NDUFA4 ITM2B MGST3 AKR7A2 GGT1 FAU RPL11 PPP1R1A SLC22A2 RPS9 RPS8 TCN2 GABARAP NAT8B RPL29 GPX4 FABP3 RPS23 RPS13 COX5B NDUFA3 AMN RPL6 RPL27 RPL26 …	0
drug:P5782:dimethyl sulfoxide-up	16984	255	215	21	S100A11 HSPD1 MIOX LACTB2 SERPINE2 LAMP2 DHCR7 MOSPD2 MARC1 UBD TGM2 ASGR1 MOSPD1 GRN DNAJA1 GLRX3 SNRPG CHUK TXNDC12 VMP1 PLOD1	1	132	FABP1 EHHADH ACOX1 ECI2 RETSAT PCTP ALDH1A1 HADHB ADTRP DECR1 NUDT7 CIDEA ACADM ACADL HACL1 CD36 EPHX2 HSD17B4 ACOT2 HSDL2 CREB3L3 MRPS18A CAT AQP7 SLC25A4 FBP1 ABCD3 VNN1 HMOX1 TXNIP MSMO1 FABP3 GSTA4 SLC25A20 ETFB AGMO TMEM14C ACADVL CHCHD10 CMBL CPT2 ALDH3A2 GDE1 EPHX1 ACAT1 MTTP OAT GSTA3 CRAT RAB30 PODN INSIG1 LPCAT3 PDK4 SUCLG2 ACADS GLRX ETFDH MOCS2 ME1 CHCHD2 ACO1 SUCLG1 TPRG1L HSD17B11 I…	0
drug:P4418:pharmaceutical-dn	16984	357	277	47	ASS1 PAH PLG CYP1A2 APOC1 F2 C9 CTSC DPYS IFITM3 AHCY AQP9 BAAT LIPC ENO1 SRD5A1 IGF1 KMO APOH MAT1A APOA2 GLS2 TUBA1B FMO1 C3 ONECUT1 AHSG CTSB AGT DIO1 AMACR GNS CRP GM2A PYGL CMTM6 YWHAB MIF SREBF1 RPN2 PDIA3 TTPA TRAP1 SDS FN1 GNE ADK	1	143	BHMT CDO1 ALDOB FGA MGST3 HSD17B6 RPS29 APOC3 SULT1A1 TTR PCK1 CD81 FBP1 B2M NDRG2 PIGR ITM2B METTL7B GNMT APOM CTH HBB UBA52 TMBIM6 TSC22D1 ABHD14B PAPSS2 RPL31 GAMT G6PC TAT OTC RPS14 KHK RNASE4 SLC41A2 ALDH6A1 MDH1 HBA2 NDUFB4 ALDH2 MAOB FAU CRIP2 TPT1 F10 RPL11 PXMP2 COX7B SOD1 TST SLC25A5 RPL29 KLKB1 PHB2 GLUL SLC37A4 ACOX2 SULT1C3 ACY1 TMEM47 NDUFB9 CPQ SDC2 MPST XDH NDUFA8 HAAO QDPR PC COX…	0
drug:P88:1-methyl-4-phenyl-1,2,3,6-tetrahydropyridine|glycerophosphoinositol-dn	16984	460	420	70	VSNL1 ENC1 CTNNB1 DDN PPP3CA OLA1 ANO3 NSF TRIM37 HOPX MIF NUAK1 HOMER1 SEZ6L2 GABBR1 ZNF365 SYNDIG1 BLCAP MORF4L2 TUBB3 MAP2K1 HPRT1 HSP90AB1 AHSA1 SLC1A3 PTDSS1 GPI DOCK4 TPBG CELSR2 RUSC1 SERPINE2 TUBB YWHAZ POLR2B R3HDM2 SLC6A1 PPME1 CIT PGBD5 CRYM MAFB SUPT16H CHST1 CKAP5 NREP DENND4B BCL7A CCT4 THY1 TFRC RAB15 PLK2 LRRC8B ENTPD6 PSMA1 KCNS1 CNNM1 MRPL42 CDH12 KBTBD2 UBE2NL FOXG1 NKRF HDAC2 …	1	199	SNAP25 NPTN LMO3 EIF4A2 CALM2 STMN2 GPM6A TUBB2A MDH1 SCN1B RTN1 TAGLN3 SH3GL2 NRN1 MTCH1 CFL1 WASF1 TSC22D1 NDUFB1 ATP6V1G2 KIF5C NELL2 GRIA2 CAMTA1 CA11 OLFM1 CALM1 RTN4 INA TSPYL4 UCHL1 FAM3C PRKCB FXYD7 AK5 SLC17A7 SLC25A3 RNF11 SNAP91 ATP6V0C HK1 NAP1L3 DYNLL1 CBX6 MGLL SPARCL1 ELAVL4 CAMK2B NCK2 CAMTA2 YPEL5 GRAMD1B PRKAR2B FKBP1B ALDOC ACTR10 CCK RGS4 NDRG4 LDB2 SLC8A2 COQ9 FGF13 OAZ1 SCG5…	0
drug:P89:1-methyl-4-phenyl-1,2,3,6-tetrahydropyridine-up	16984	528	474	79	CRYM ANO3 COCH TPBG TMEM158 GPI SLC1A3 BLCAP HEY1 CHST1 PABPC1 CTNNB1 DOCK4 DDN SPP1 TUBA1C RLIM TRMT5 PPP3CA MIF PABPC3 BHLHE41 NCL PPT1 HSPH1 IVNS1ABP C4ORF46 PSMA1 YWHAZ DPYSL2 BZW2 CALB1 MYBPC1 HSP90AA1 GABBR1 HNRNPK PTGES3 BCL11B DDR1 PPA1 SNRPB2 CCT4 SRSF9 FKBP1A XPO1 SUMO4 ATP6AP1 THY1 TRIP12 CDH11 DHX15 HSPD1 PRMT1 PLK2 CACNG4 ZNF207 LRRC8D AP2B1 PCDH17 NPM1 MAP2K1 CA12 HSPA5 C3 AGT VPS26…	1	233	ARPP21 PENK EEF1A1 RPS27A RPL32 RPL23A RPS23 HPCA MTCH1 UBA52 RPS20 MEIS2 ACTB RPL13A TAC1 ACTR10 OAZ1 NPTN RPS24 SCG2 RPS13 UCHL1 RPL11 UBC TSC22D1 CD81 RPL3 CRYAB RPS5 PPP1R1A CALM2 RPLP1 PLP1 GABARAPL2 RPS15A ENPP2 FAU RTN4 RPL27 EEF1B2 CACNA2D3 MXRA7 RPL10A DDX5 RPL34 PRKACB VDAC2 JTB GDE1 SLC25A5 CD63 HINT1 PRKCB MDH1 RPS29 CYP46A1 RPS25 CALM3 CHCHD2 TPT1 RHOB ATP6V0D1 PJA2 RHOA RPL6 COX7B T…	0
drug:P86:1-methyl-4-phenyl-1,2,3,6-tetrahydropyridine-dn	16984	599	538	87	CTNNB1 TUBA1B TUBA1A SERPINE2 HSP90AB1 MIF VSNL1 DPYSL2 TUBB3 MARCKSL1 NCL MORF4L2 HOPX HNRNPA2B1 SLC6A1 GABBR1 SLC1A3 PLS3 DDN ENC1 NSF PTDSS1 HIF1A BLCAP SUPT16H PPP3CA R3HDM2 DOCK4 C4ORF46 TUBB HOMER1 NUAK1 YWHAZ ZNF365 TRIM37 HNRNPK CEP170 PPT1 GPI CKAP5 PABPC1 AHSA1 UBE2NL OLA1 RUSC1 CIT STAU1 ARID5B PTGES3 ANO3 UBE2Q1 TRMT5 SET KTN1 SEZ6L2 HPRT1 CTCFL CNP POLR2B CCT4 CELSR2 HDGF ENO1 DDR1 K…	1	271	EIF4A2 SNAP25 PTGDS CALM2 TPT1 EEF1A1 UBC CKB ACTB RPL3 RPL23A TUBA1A RPS20 SPARCL1 ALDOC UCHL1 MDH1 KIF5C GPM6A TUBB2A RPL32 SCN1B MORF4L1 VDAC2 STMN2 CFL1 VAPA RPS13 CST3 RTN4 OAZ1 TSC22D1 RTN1 PAQR6 SLC25A3 RNF11 LMO3 MTCH1 RPL13A CRYAB COX6A1 ITM2B RPS23 MXI1 INA RPS24 TAGLN3 RPLP1 WASF1 RPS27A ELAVL4 NDUFB1 ATP6V0C CD63 RPL27 UGP2 DYNLL1 GSTO1 ATP1A2 TSPYL4 RPS3A NDUFS1 GLUL RPL9 RPL34 CHCHD…	0
drug:P87:1-methyl-4-phenyl-1,2,3,6-tetrahydropyridine|glycerophosphoinositol-dn	16984	469	427	68	VSNL1 ENC1 MIF CTNNB1 DDN OLA1 GABBR1 SERPINE2 PPP3CA NSF NUAK1 HOMER1 TRIM37 BLCAP ANO3 MORF4L2 SEZ6L2 HPRT1 SYNDIG1 ZNF365 HIF1A R3HDM2 PTDSS1 MAP2K1 CIT UBE2NL HSP90AB1 GPI RUSC1 KCNS1 PGBD5 SUPT16H CKAP5 TUBB3 CHST1 TUBB YWHAZ HOPX DOCK4 CRYM CELSR2 KBTBD2 SLC6A1 THY1 CCT4 TPBG NREP PSMA1 MSL1 SHROOM2 BCL7A LRRC8B NKRF POLR2B PPT1 TFRC PRPF19 UBE2Q1 DENND4B CNNM1 PPME1 TCERG1 MRPS30 OVGP1 SPO…	1	196	EIF4A2 NPTN SNAP25 LMO3 GPM6A CALM2 TUBB2A KIF5C SCN1B TSC22D1 STMN2 RTN1 SH3GL2 MDH1 TAGLN3 NRN1 MTCH1 GRIA2 ATP6V1G2 UCHL1 WASF1 RNF11 VAPA NAP1L3 NDUFB1 INA NELL2 ALDOC CAMTA1 OLFM1 AK5 HK1 TSPYL4 CA11 PRKCB CBX6 NCK2 CALM1 SPARCL1 FXYD7 FAM3C ATP6V0C ELAVL4 YPEL5 SLC17A7 VDAC2 CCK MGLL CAMK2B TSPAN7 PKIA DYNLL1 COX7B CAMTA2 ACTR10 SNAP91 GRAMD1B SATB1 PIP5K1C TSPYL1 FGF13 FKBP1B CHCHD2 PPP1R3…	0
drug:P2871:hormone-up	16984	324	273	32	ACLY UCP1 ACACA SOD2 ENO1 CTSB PPA1 APOC1 HK2 HSPA9 PYGL YWHAG SFXN1 MRPL42 SNX10 C3 HSPD1 MRPL30 TNNI2 EIF4EBP1 TIMM17A SLC24A3 MRAP MLXIPL PGM2 YWHAB MRPL50 ATP2A1 SLC25A19 PSMA4 NUDT4 COX19	1	155	CFD CIDEA IFI27 COX7A1 COX5B NDUFA4 COX6A1 COX8A COX6B1 NDUFB8 COX5A CHCHD10 UQCR10 NDUFA1 UQCRH PDK4 PNPLA2 ACO2 UQCR11 HADHB COX4I1 FTH1 COX7C ETFA ACADM IDH3G ETFB UQCRC2 CDO1 ACADVL NDUFA6 UQCRB UQCRC1 NDUFV1 COX17 FABP3 NDUFA10 ELOVL6 ECI1 GPD1 PLIN4 NDUFS7 ACTA2 SLC25A5 NDUFS3 NDUFA3 CIDEC NDUFC1 NDUFV2 AGPAT2 AOC3 DBI CHPT1 NDUFA2 ECHS1 NDUFB3 GJA1 NDUFS8 NDUFA12 UBB NDUFS4 NDUFA8 S100A1 C…	0
drug:P2870:hormone-up	16984	253	218	32	UCP1 ACLY ACACA BPIFA1 NPPA ENO1 SOD2 ATP2A2 PPA1 PYGL APOC1 HK2 HSPA9 MRPL42 CTSB HSPD1 SNX10 NUDT4 SFXN1 YWHAG EIF4EBP1 MYBPHL MRAP SLC24A3 MRPL50 MLXIPL MRPL30 PGM2 TIMM17A TNNC1 CSRP3 TCAP	1	123	CIDEA COX7A1 CFD PDK4 COX5A IFI27 HADHB COX5B COX6B1 NDUFA1 ELOVL6 FABP3 COX6A1 ACO2 NDUFA4 ACADM PNPLA2 ACADVL UQCRC2 ETFA NDUFB8 IDH3G UQCRH COX7C UQCRB CHCHD10 AGPAT2 UQCRC1 ECI1 UQCR11 GPD1 NDUFS3 COX8A CHPT1 NDUFA6 NDUFC1 NDUFA10 NDUFA12 PLIN4 CIDEC ACSL1 LETMD1 CDO1 SLC25A5 ECHS1 ACTA2 ETFB NDUFV1 DLST NDUFV2 CPT2 NDUFS4 NDUFS8 GJA1 NDUFS7 NDUFA8 ME1 AOC3 NDUFB3 COX4I1 GSTO1 ALDH6A1 S100A1 …	0
drug:P2873:hormone-up	16984	330	282	37	TNNC1 ATP2A2 RPL3L TCAP GPC1 CSRP3 HK2 SOD2 NPPA MYH6 MRPL42 HSPA9 ANKRD1 TIMM17A NCEH1 IVNS1ABP TRIM72 CORIN MRPL30 TMEM65 LBH FKBP4 ADK PRPF19 CDK2AP1 CENPA ANKRD23 TNNI3 RABGGTB SPTB QRSL1 GSPT1 BZW2 PPA1 MRPL50 HSPD1 PSMA4	1	160	MYL3 MYL2 FABP3 CKMT2 COX7A1 HSPB6 NDUFA4 NDUFB8 UQCRC2 UQCR10 UQCRH COX5B COX7C COX4I1 UQCRC1 COX5A UQCR11 NDUFV1 COX6B1 ACTN2 S100A1 CHCHD10 HRC MYBPC3 OXCT1 NDUFA6 ACTC1 NDUFA10 FHL2 ETFB NDUFV2 NDUFA3 ACO2 NDUFA1 CKM NDUFA2 NDUFS7 NDUFC1 EEF1A2 GJA1 BAG3 ASB2 ACADVL DES HADHB NDUFA12 ETFA MYOZ2 CRYAB ACADM NDUFS3 IDH3G VEGFB NDUFA8 PPP1R3C NDUFS8 SLC25A5 COX17 SSPN FTH1 HSPB7 POPDC2 PKIA OGDH…	0
drug:P2872:hormone-up	16984	341	292	38	TNNC1 NPPA ATP2A2 TCAP RPL3L GPC1 SOD2 HK2 CSRP3 MRPL42 MYH6 ANKRD1 HSPA9 ACLY TRIM72 TIMM17A MYBPHL NCEH1 CORIN IVNS1ABP FKBP4 UCP1 TMEM65 MRPL30 CDK2AP1 ACACA NUDT4 CENPA GSPT1 SPTB LBH PPA1 ADK PRPF19 TNNI3 ANKRD23 RABGGTB IGF2	1	166	MYL2 MYL3 FABP3 COX7A1 CKMT2 HSPB6 NDUFA4 NDUFB8 COX5B UQCR10 MYL4 UQCRH UQCRC2 COX5A COX7C COX6B1 UQCR11 CHCHD10 UQCRC1 COX4I1 NDUFV1 ACTN2 NDUFA10 HRC ACTC1 ETFB NDUFA6 OXCT1 ACO2 NDUFV2 NDUFA3 S100A1 NDUFS7 MYBPC3 NDUFA2 NDUFA1 FHL2 CFD FTH1 GJA1 CKM BAG3 NDUFC1 EEF1A2 COX17 IDH3G CRYAB NDUFA12 DES CLU ASB2 ETFA VEGFB ACADM HADHB ACADVL NDUFA8 NDUFS8 SSPN CRIP2 SLC25A5 PNPLA2 PPP1R3C DLST NDUF…	0
drug:P2876:hormone-dn	16984	315	271	40	HP F2R ARL6IP1 ATP2A2 HEY1 MORF4L2 STT3B EDN1 TCAP GRINA RPN2 FMO1 SUZ12 DRAM1 SMG1 PODXL SPTLC1 SRSF9 BCCIP CDK2AP1 SLC6A6 AP1AR NPPA GSPT1 CD47 PTK2 IGF2 MYBPHL NCEH1 FKBP4 MNS1 PDIA3 FAM76B HNRNPM UBE2O ADD3 LOX GPX8 NUDT4 PPP3R1	1	138	SELENBP1 TXNIP FHL1 ERRFI1 RGCC ALAS1 CFD UBB TMEM100 SFTPD ADRB2 INMT RPS14 TMBIM6 DBP ALDH2 EIF4H P4HB SGK1 MYL4 EMP1 DYNLL1 RPL3 HPGD GSTO1 WBP2 HERPUD1 CALM3 PRELP RPL9 RPL34 RPL10 GPX3 ZFYVE21 ALAS2 RPL18 SULT1A1 UQCR10 RPS6 ST5 SFTPA1 CSRNP1 KLF2 NDUFA4 ID1 LEPROT JUN OAT PRNP XDH FAU COX8A TSPAN7 MYH11 ALDH3A2 CKMT2 CHCHD10 RPLP1 CYP4B1 UQCRH TCF21 EIF4A2 RPS27L IGFBP5 MCEE TAPT1 UBL3 COX7…	0
drug:P2056:pyrrolidine-up	16984	338	282	40	SPP1 CTSB IGFBP1 ASS1 DIO1 APOE MIOX UBD DAO IGFBP7 PAH AMACR SLC5A3 CXCL1 NIT2 ADK IVNS1ABP FETUB FCER1G HSPA9 S100A11 PSMC4 CXCL11 FMO1 VMP1 SDS C4B IGFBP3 PSPH PGK1 MTHFD1 CHDH HPRT1 NCBP1 NUAK2 HRG SLC22A6 UAP1L1 ATP6AP2 FCGR3A	1	151	DNASE1 GPX3 B2M COX6A1 SPINK1 OAT SLC3A1 PCK1 ATP6V0C SGK1 ALDOB TXNIP PRDX5 FTH1 DBI COX7B CLU HPD MDH1 TEX264 SULT1C2 CST3 ACY3 GPX4 GABARAP CISD1 CYB5A NDUFS5 CSRP2 NFKBIA ATP6V0E1 NDUFA1 GOT1 UQCRC1 ECHS1 COX4I1 GHITM GRHPR OGDH GSTO1 NIT1 ERRFI1 PEBP1 RPL10 NDUFA5 TPT1 SLC26A4 UQCRB COQ10B TSC22D3 SOD1 TSPO NDRG1 PGRMC1 CHMP5 TMEM50B AK4 OSGIN1 ABHD14B BNIP3 APOM NDUFA6 G6PC CD63 DPT COX5B I…	0
drug:P2058:pyrrolidine-dn	16984	346	295	43	IGFBP7 DIO1 DAO PMEPA1 APOE COL1A2 IVNS1ABP ALOX15 DAB2 SPARC ATP6AP2 SLC22A6 SPP1 CDH16 NREP FMO1 CTSB S100A11 OPLAH NUAK2 KRT7 SFRP2 DDAH1 IRF3 HSPA5 HSPD1 MTHFD1 UCP1 SLC34A3 GREM1 LAMP2 PLAU PLSCR2 ERMP1 MMP9 ALX1 CLDN16 COL15A1 ANXA1 GPI UAP1L1 ACTR2 LY6E	1	160	GPX3 FTH1 HBB PCK1 SLC3A1 HBA1 ITM2B UBB DBI SULT1C2 PTTG1IP SOD1 B2M PEBP1 FBP1 ACY3 ATP6V0C COX6A1 GRHPR DNASE1 ALDOB CCNI SMOC2 ATP6V0E1 TEX264 DCN AGXT2 GSTO1 SGK1 G6PC DPT ECI1 MDH1 TXNIP CRYAB SDHC SOSTDC1 MAL CD81 BPHL TMBIM6 COX7B SKP1 OAZ1 CYB5A GSTA2 ALDH1A1 EFHD1 ACADM SLC22A5 NDUFB9 PYROXD2 HADH CISD1 MAP2K2 SOD3 COX8A ACSM2A PTH1R ABHD14B KLF9 EIF4A2 COX4I1 CPQ CST3 ARHGAP24 NDUFB2 S…	0
drug:P4679:protein polypeptide chain|17alpha-ethynylestradiol|estrogen-up	16984	232	206	27	FASN ACLY TINAGL1 HSP90AB1 IGFBP7 C1QBP HSPH1 GPI HSPA1B PLA2G2A HSPA5 AHSA1 ATP2A2 TCP1 PTGES3 NACC1 MIF TGM2 CTSB P4HA1 HNRNPM VCAM1 AMIGO2 CCT3 COPA G6PD NANP	1	115	CBR1 SPARCL1 TPM2 FABP4 MYH11 ACTN1 MYL9 SULT1A1 FLNA DYNLL1 RPL9 PNPLA2 DBI RPS8 ACO1 RPS11 CSRP2 COX4I1 ME1 RPLP1 ACSS2 CCDC107 DSTN SLC25A5 RPS3A RPL37A RGS2 CPE FTH1 GLUL PPP1R14A FAM214A ERRFI1 SOD1 PPP3CB RPS27A KANK2 PC FHL1 HSPB6 MGST2 PFN1 NFKBIA ALDH2 PDLIM3 PRDX6 SLC25A1 TLN1 CEBPD SORBS2 MRFAP1 BTF3 SERPINB6 TNS1 NDUFB10 RPL6 NDUFB11 INMT MANF CSRP1 COX7A2 CIDEA SLIRP PSME1 CAV1 NDUFB…	0
drug:P2859:hormone-up	16984	263	225	33	TNNC1 ATP2A2 NPPA TCAP RPL3L GPC1 HK2 CSRP3 MYH6 NCEH1 ANKRD1 SOD2 TIMM17A MRPL42 LBH IVNS1ABP TRIM72 CDK2AP1 TMEM65 CORIN GLG1 TUBA1B COL4A1 BGN COL4A2 TGM2 CENPA ANXA2 PRPF19 PDRG1 UACA ATP6AP1 ANKRD23	1	126	MYL3 MYL2 FABP3 CKMT2 COX7A1 HSPB6 NDUFB8 ACTN2 CRIP2 OXCT1 COX4I1 HRC ACTC1 MYBPC3 UQCRC1 BAG3 UQCRH UQCR10 UQCRC2 S100A1 FHL2 ACO2 NDUFV1 GJA1 CKM DES COX7C COX5A NDUFA3 UQCR11 NDUFV2 COX5B EEF1A2 COX6B1 ASB2 NDUFS7 CRYAB NDUFA4 NDUFA1 SSPN NDUFA10 NDUFA2 MYOZ2 CTNNA1 VEGFB CST3 OGDH HADHB NDUFC1 PKIA COX17 IDH3G NDUFA6 NDUFA12 PDK4 POPDC2 HSPB7 MGST3 CLIP4 COX10 INPP5A PPP1R3C PFKM MYOM1 DLST …	0
drug:P2858:hormone-up	16984	272	237	36	TNNC1 NPPA ATP2A2 TCAP GPC1 RPL3L HK2 CSRP3 MYH6 ANKRD1 SOD2 NCEH1 BGN MYBPHL MRPL42 TRIM72 TUBA1B TIMM17A LBH CORIN TMEM65 GLG1 CDK2AP1 ANXA2 COL4A1 IVNS1ABP S100A11 COL4A2 IGF2 ATP6AP1 CENPA UACA LOXL1 TGM2 UCP1 FKBP4	1	132	MYL2 MYL3 FABP3 COX7A1 CKMT2 HSPB6 MYL4 NDUFB8 ACTN2 CRIP2 HRC UQCR10 UQCRH ACTC1 COX4I1 UQCRC1 OXCT1 NDUFA4 UQCRC2 COX5B ACO2 NDUFV1 COX5A MYBPC3 UQCR11 BAG3 COX7C COX6B1 CFD GJA1 NDUFA3 NDUFA10 NDUFV2 S100A1 DES NDUFS7 FHL2 GPX3 CKM EEF1A2 CRYAB COX17 NDUFA2 CST3 SSPN ASB2 NDUFA1 CTNNA1 VEGFB IDH3G NDUFC1 NDUFA12 OGDH NDUFA6 PNPLA2 PKIA HADHB INPP5A ETFB PDK4 POPDC2 RPLP1 DLST RABAC1 PFKM CLIP4…	0
drug:P2857:hormone-up	16984	257	219	27	ACLY UCP1 ACACA S100A11 HK2 ANXA2 SOD2 CTSB BGN ENO1 ATP2A2 COL4A1 SPARC SLC24A3 YWHAG COL4A2 LOXL1 ELN SNX10 TIMM17A YWHAB TGM2 FMO1 PPA1 AEBP1 GPX8 EIF4EBP1	1	126	CFD CIDEA IFI27 COX7A1 ACO2 PNPLA2 PDK4 NDUFB8 COX8A NDUFA1 HADHB COX6B1 COX6A1 COX5B COX5A CAV1 COX4I1 UQCRH UQCR10 ACTA2 FABP3 CST3 IDH3G GPX3 UQCR11 COX17 UQCRB RGCC PLIN4 GJA1 ACADM NDUFA4 FHL1 CIDEC GPD1 AOC3 ETFA TXNIP ELOVL6 ACADVL MYL6 IGFBP5 NDUFA3 COX7C UQCRC1 NDUFS7 PRELP CSRP2 NDUFB3 MYH11 CHPT1 RPL5 ATP1A2 LETMD1 NDUFV2 TPM1 NDUFS3 NDUFC1 OGDH DLST NDUFS4 AGPAT2 NUPR1 ECI1 TMEM109 ND…	0
drug:P4863:-dn	16984	417	337	41	TCAP TNNC1 CSRP3 TUBA1B TNNT2 TNNI3 NPPA HSPD1 RPL3L MYLK4 TMX1 PHLDA1 HOPX PGK1 TMEM182 COL4A1 HK2 SERPINH1 SEC61G XIRP1 MRPS35 HSPA5 MCF2L FOPNL PSMD3 COL4A2 PFDN6 PSMB2 SMYD2 PDCD5 PTTG1 TIMM17A PRPF19 BCCIP EMILIN2 RDM1 PSMC4 PERP NAA38 LCLAT1 DAP3	1	186	COX7A1 MAP1LC3A NDRG4 UQCRH MYOZ2 COX4I1 ACTC1 UQCR11 UQCRC1 ETFB NDUFV1 NDUFB10 CHCHD2 NDUFB11 CHCHD10 RPL31 KXD1 NDUFB7 FTH1 NDUFA4 COX6B1 MYL2 PINK1 RPLP2 NDUFV3 UQCRB FAM174B NDUFA5 NDUFS7 SDHB ACTN2 CKMT2 NDUFA2 NDUFC1 RPS29 COX5A NDUFA6 EEF1A2 NDUFB5 MYOM1 NDUFA1 COX7A2 PRDX5 NDRG2 UBA52 PFKM CASQ2 CRIP2 HRC UNC45B MYL3 NDUFA8 POPDC2 ACADVL PDK4 NDUFA7 ITGB1BP2 FNDC5 RPLP1 CST3 RPL36 OXCT1 …	0
drug:P4864:-dn	16984	448	355	43	TCAP TNNC1 CSRP3 TUBA1B TNNI3 MYLK4 TMX1 PHLDA1 APOE NPPA SEC61G PGK1 HK2 HSPA5 MCF2L COL4A1 TMEM182 HSPD1 PDCD5 PSMD3 HOPX RPL22L1 SPARC BCCIP POMP RPL3L PSMC4 FEN1 SNRPE INO80 ITGB5 MRPS35 TUBA1A XIRP1 RDM1 EMILIN2 SMYD2 NAA38 EIF3B ADRM1 RPL7 CIAO1 POLR2B	1	197	MAP1LC3A RPLP2 COX4I1 COX7A1 CHCHD2 UQCRC1 ACTC1 MYOZ2 UQCRH ETFB NDUFB11 RPL31 NDUFB7 RPS29 COX6B1 CHCHD10 KXD1 FTH1 UQCRB NDUFA2 NDUFA1 SNX17 UBA52 RPLP1 NDUFA5 COX5A MYBPC3 NDRG2 MYL2 ACTN2 UQCR11 NDUFS7 MYL3 NDUFA4 RPS8 OAZ1 EEF1A2 NDUFB10 NDUFV1 RPS14 NDUFV3 FAU NDUFB5 NDRG4 ACADVL MYOM1 SDHB NDUFC1 DBP RPL36 ISCU NDUFA8 PRDX5 CKMT2 PFKM TXNIP NDUFS2 ACO2 CRIP2 RPL27A PSMC3 GPX4 OXCT1 NDUFA7…	0
drug:P2321:corticotropin|dexamethasone-up	16984	300	250	30	FASN APOE UCP1 CALB1 ACLY TUBA1B IGFBP1 RBP4 AGT ENO1 G6PD FMO1 HSPA1B ASS1 SREBF1 EIF4EBP1 TRAP1 ACACA CTSC C1QBP DHCR7 TUBA1A C4B ACP5 SPRR1A PAH YWHAG SOD2 TMEM79 PYGL	1	133	HBA2 HBB PCK1 SOD3 TSPO GPD1 FABP4 SLC25A1 SULT1A1 TMBIM6 ALDOB DNASE1 SDHA CIDEA EEF2 HADHB RPS29 NDRG2 CFD COX7A2 COX4I1 AUH TXNIP CDO1 CPT2 GSTM1 BCKDHB IDH3G MDH1 AQP7 TAGLN TST ACADL GPT DBI SUCLG1 SPINK1 COX5B CCNG1 RPS9 CSRP2 DGAT1 NDUFB9 COX6A1 CD36 CAV1 SNCG PRDX6 ATP1A2 INSIG1 PC PLIN2 RPLP2 CRIP2 PFKL MAP1LC3A LGALS3 NDUFV3 ME1 CD63 CRYAB ACADM ACADVL EPHX2 SLC25A3 PHB2 NDUFS7 APOC3 MY…	0
drug:P2320:dexamethasone-up	16984	460	395	59	PLAU CTSB CDH16 SLC22A6 ENO1 SPP1 HSP90AB1 CALB1 DDAH1 OPLAH GNS GRN DAB2 LRP2 SLC25A30 FMO1 CLTC CD24 TUBA1C AHCY PMEPA1 DNAJA1 KMO MRPL3 APOE SFXN1 FAM111A HSP90B1 PAH ATP6AP1 SCD UBQLN1 HNRNPK GRINA CHDH AMACR PNPO GGH IVNS1ABP CPSF4 PAICS EIF3B HSPA1B SLC22A1 CYP24A1 CLPB ACP5 FAT1 LAD1 SLC6A6 CPSF3 PSMC1 PSMC4 HSPH1 VMP1 F2R CCDC117 TNS3 LAMP2	1	196	AKR7A3 PCK1 DNASE1 ACY1 FTH1 ITM2B UBC AKR7A2 GSTA1 SLC22A18 ZFP36 TMBIM6 UBB CRYAB ALDOB SOD3 RESP18 RPL26 SDHA GPX3 TPT1 GPX4 SLC22A2 PTTG1IP CKB EEF2 RPL18A SLC3A1 FAU UBA52 FBP1 CITED2 COX5B GGT1 DBI APOM KCNJ16 SOSTDC1 LDHD ATP6V0C DBP CTH GLUL SLC4A4 ACSM2A NAT8B ALDH2 TTC36 TMEM59 RPS29 TPRG1L RPS5 SPINK1 B2M RPL29 BCKDHB PEBP1 SGK1 PPP1CC ALDH1L1 TCN2 GRHPR RPS27L PFN1 EDF1 PRSS8 RPL36 HP…	0
drug:P841:Congenital pure red cell aplasia-dn	16984	455	323	51	APOA2 APOE RBP4 APOC1 C9 PLG AHSG HP AHCY F2 IFITM3 SERPINA11 C3 APOF PAH INO80 TTPA SERPINA10 SERPINF2 HSD3B7 CYP1A2 HAMP ASGR1 CFHR1 GJB2 SAA1 SLC22A1 C4B MAT1A DIO1 PROC CRP RPL22L1 LIPC IGF1 OBP2A FETUB HSP90B1 NIT2 HSPD1 FMO1 AMACR FGL1 SNRPE PPA1 DNAJA1 SEC61G HOPX POMP KNG1 PSMA4	1	162	FABP1 APOA1 BHMT TTR ALDOB APOC3 FGA HPD KXD1 APOA4 EEF1A1 PGRMC1 CYB5A GNMT RPLP1 B2M PEBP1 ALDH1A1 RPL26 RPS29 RPL31 CDO1 FTH1 STARD10 SERPINC1 ANGPTL3 COX4I1 ALAD RPS14 CHCHD2 RPL4 FABP2 FAU C8G MSRB1 DCT FBP1 PHYH INMT CHCHD10 RPS27A SDHB RPL34 RNASE4 TTC36 UBA52 NDUFB11 RPS23 NDUFA1 RPL27A P4HB RPL13 RPS15 SAR1B RPLP2 HEBP1 UQCR11 EPHX2 TMBIM6 RPL10 COX6A1 RPS5 RPL18A SELENBP1 RPL23A HINT1 P…	0
drug:P840:Congenital pure red cell aplasia-up	16984	253	190	27	PAH AHCY HRG SDS MAT1A SERPINA6 HAMP GLS2 IGFBP1 RGS16 SLC38A4 ASS1 PYGL CYP17A1 NNMT F5 AGT FASN RNF149 PAICS COL18A1 SFXN1 SREBF1 NUDT19 PGK1 AQP9 C3	1	107	FBP1 TAT GOT1 COX6B1 GNMT SLC37A4 QDPR APOA4 OAT SLC2A2 APOM SERPINC1 RPL10 RPL3 HERPUD1 UQCRB ERRFI1 LGALS9 PNP DBI RPL36AL GSTK1 KHK PIPOX ACOX2 GLUL RNASE4 ABCG5 ST3GAL5 ME1 GCDH P4HB SRSF5 GSTM1 HAAO ACADM UGP2 REEP6 ASIC5 NDUFV1 CAT G6PC JTB FTH1 GSTA3 GSTM3 OSBPL1A BNIP3 MARC2 GLRX SLC29A1 SDHB RPL10A HPN NDUFB6 ACSL5 MFSD2A VAMP8 AKR1A1 NDUFA5 TM4SF4 ABHD14B FMO5 ABCG8 LPCAT3 VDAC2 PINK1 B…	0
drug:P840:Congenital pure red cell aplasia-dn	16984	341	243	43	C9 HP AHSG RBP4 AMACR GJB2 TTPA DIO1 SERPINA11 CFHR1 C4B APOA2 PLG CRP IGF1 IFITM3 HSD3B7 OBP2A SERPINA10 ASGR1 LIPC APOC1 SERPINF2 FGL1 KMO INO80 FETUB SLC22A1 SNRPE KNG1 DNAJA1 ELOVL3 PNPO ELOVL2 CYP1A2 HSPA5 SAA1 LGALS8 ACP5 TTC39C HOPX MLXIPL POMP	0.999995	127	BHMT APOC3 EPHX2 ALDH1A1 FABP2 APOA1 FABP1 DCT CDO1 ANGPTL3 TMBIM6 PGRMC1 PIGR EHHADH RPL4 ALAD PLIN2 HACL1 IFI27 FAU ADH4 FGA MSRB1 CD81 HAGH HSD17B2 AADAC GPX4 RPS15 ECI1 VNN1 PFN1 B2M NDUFA4 PEBP1 PHYH CYB5A OSGIN1 SLC22A7 RPS27A DNAJB9 CMBL HPD SELENBP1 NUDT7 SAR1B NDUFB11 CST3 EPHX1 DECR1 HADHA SULT1A1 SEC14L2 TTR GSTZ1 RPS8 HINT1 GHITM COX7A2 EEF1B2 RPL18A INMT RPL34 RPL13A KLKB1 ACAT1 TST …	0
drug:P5748:bis(2-ethylhexyl) phthalate|dimethyl sulfoxide-up	16984	289	239	30	SERPINE1 LACTB2 MAL2 ABCB11 FER1L5 SHMT2 TGM2 PSMA1 MOSPD2 MARC1 CHUK SRD5A1 ENO1 PSMB2 AGT PSAT1 ASGR1 SRP9 VMP1 F2 SLC25A13 PSMD2 PDE3B SSR1 SERPINE2 SLC16A6 PSMA4 NBN MIOX USP14	1	139	ACOX1 PCTP ECI2 HSDL2 TXNIP EHHADH FABP1 ABCD3 HSD17B4 HACL1 ADTRP HADHB GPD1 PDK4 DECR1 NUDT7 GSTA5 EPHX2 SAR1B OAT CREB3L3 ALDH1A1 ACO1 RETSAT ACADM FBP1 PEX11A CHCHD10 ACOT2 MTTP ACADVL VNN1 ACOT12 CMBL SLC25A20 GSTA4 TMEM14C CIDEA DBI LIPA ACADL PPCS ETFB SERP1 CPT2 PDHB AGMO MOCS2 MRPS18A ETFDH ACO2 PHYH PODN ALDH3A2 CAT GLRX DAD1 ACAT1 EGLN3 ETFA BLVRB INSIG1 EEF1B2 HIBCH SLC6A13 GK ME1 LPC…	0
drug:P2839:hormone-dn	16984	407	345	43	TNNC1 ATP2A2 NPPA SOD2 RPL3L CSRP3 TCAP MYH6 NCEH1 HK2 ACLY GPC1 HSPA9 MRPL42 ANKRD1 LBH CORIN TIMM17A FKBP4 UCP1 IVNS1ABP CDK2AP1 TRIM72 TMEM65 MRPL30 ACACA PPA1 TGM2 TNNI3 PRPF19 MIF ADK COL4A1 COL4A2 MYBPHL NRP1 MRPS17 PDRG1 PKP2 GLG1 POMP GSPT1 NSUN4	1	201	MYL2 MYL3 FABP3 COX7A1 CKMT2 NDUFA4 NDUFB8 UQCR10 COX4I1 UQCRC2 UQCRH COX7C COX5B HSPB6 COX6B1 UQCR11 CHCHD10 COX5A NDUFV1 UQCRC1 CRIP2 FTH1 S100A1 RPLP1 ETFB NDUFA6 ACTC1 ACO2 MYBPC3 NDUFV2 NDUFA3 NDUFA10 OXCT1 ACTN2 NDUFA2 NDUFS7 NDUFA1 BAG3 HRC FHL2 MYL4 COX17 CTNNA1 ACADVL OGDH NDUFC1 NDUFA12 HADHB DLST CFD IDH3G GJA1 NDUFA8 RPL9 NDUFA7 ACADM CRYAB COX8A UBB ETFA PNPLA2 CIDEA VEGFB HIGD2A RPS…	0
drug:P2838:hormone|N-benzyladenine-dn	16984	397	335	43	TNNC1 ATP2A2 RPL3L SOD2 CSRP3 TCAP MYH6 HK2 NPPA NCEH1 GPC1 HSPA9 ACLY MRPL42 LBH CORIN ANKRD1 TIMM17A FKBP4 IVNS1ABP UCP1 TMEM65 ACACA MRPL30 TRIM72 PPA1 COL4A1 TNNI3 CDK2AP1 PRPF19 ADK TGM2 NRP1 COL4A2 MIF PDRG1 PKP2 NSUN4 POMP MRPS17 GSPT1 GLG1 BTBD1	1	198	MYL3 MYL2 FABP3 COX7A1 CKMT2 NDUFA4 NDUFB8 UQCR10 COX4I1 UQCRC2 UQCRH COX7C COX5B COX6B1 UQCR11 HSPB6 COX5A CHCHD10 NDUFV1 UQCRC1 CRIP2 S100A1 ACO2 FTH1 NDUFA6 NDUFA3 MYBPC3 ACTC1 ETFB NDUFV2 NDUFA10 OXCT1 ACTN2 NDUFS7 NDUFA2 NDUFA1 HRC BAG3 RPLP1 FHL2 COX17 ACADVL CTNNA1 OGDH HADHB NDUFC1 NDUFA12 DLST NDUFA8 IDH3G ACADM ETFA GJA1 PNPLA2 VEGFB NDUFA7 ASB2 PDK4 CIDEA CFD HIGD2A UBB ECI1 EEF1A2 CRY…	0
drug:P2835:hormone-dn	16984	303	254	31	UCP1 ACLY ACACA ENO1 SOD2 CTSB HSPA9 PYGL PPA1 HK2 APOC1 ATP2A2 YWHAG SNX10 HSPD1 SFXN1 MRPL42 SLC24A3 MLXIPL MRPL50 PGM2 MRAP BPIFA1 TIMM17A NUDT4 EIF4EBP1 SLC25A19 YWHAB MRPL30 FASN COX19	1	144	CIDEA CFD COX7A1 IFI27 CHCHD10 NDUFB8 HADHB COX5B COX5A PDK4 ACO2 NDUFA4 COX6B1 COX6A1 PNPLA2 UQCRH ACADM UQCRC2 UQCR11 COX8A COX4I1 UQCR10 ACADVL NDUFA1 ETFA COX7C ELOVL6 IDH3G FABP3 ETFB UQCRC1 GPD1 UQCRB CDO1 NDUFV1 ECI1 NDUFA6 NDUFS3 NDUFV2 NDUFA10 LETMD1 PLIN4 COX17 ECHS1 AGPAT2 NDUFS7 DLST ACSL1 SLC25A5 CIDEC NDUFC1 CHPT1 CPT2 NDUFS8 ME1 AOC3 ACSL5 NDUFB3 NDUFA8 NDUFA3 GJA1 NDUFS4 ALDH6A1 A…	0
drug:P2834:hormone-dn	16984	308	263	32	UCP1 ACLY ACACA ENO1 SOD2 CTSB HSPA9 PYGL HK2 PPA1 ATP2A2 APOC1 YWHAG HSPD1 SNX10 MRPL42 SFXN1 SLC24A3 BPIFA1 NUDT4 MRPL50 MLXIPL NPPA MRAP PGM2 EIF4EBP1 TIMM17A MRPL30 YWHAB SLC25A19 COX19 FASN	1	150	CFD CIDEA COX7A1 IFI27 NDUFA4 COX5B CHCHD10 PDK4 HADHB COX5A NDUFB8 COX6B1 UQCRH PNPLA2 UQCRC2 COX6A1 ACO2 COX8A ACADM ETFA UQCR10 NDUFA1 ACADVL UQCR11 COX7C IDH3G ELOVL6 COX4I1 FABP3 GPD1 UQCRB UQCRC1 ETFB NDUFA6 CDO1 NDUFV1 ECI1 NDUFS3 SLC25A5 NDUFA10 NDUFV2 LETMD1 AGPAT2 PLIN4 ECHS1 ACSL1 NDUFC1 CIDEC CHPT1 COX17 NDUFS7 DLST NDUFS8 ACSL5 CPT2 GJA1 ME1 AOC3 NDUFA8 NDUFS4 AHCYL1 NDUFA12 NDUFB3 A…	0
drug:P2837:hormone-up	16984	386	322	55	NREP MYH4 ANKRD23 TNNC1 TCAP TNNT1 RPL3L SPARC PPP1R27 IGF2 PGM2 COL1A1 ATP2A2 BTBD1 TNNI2 MRPL42 UACA MREG SMTNL2 HK2 COL16A1 CPXM1 SFRP2 COL1A2 LUM AEBP1 PODXL2 DDIT4L LRRC15 THY1 STAC3 PCOLCE HTATSF1 SHISA2 SIX1 MYH1 MYBPC1 CDK16 PRRC2A CYB5B THBS2 AIMP2 TIMM17A SCARF2 LOXL1 KCNC4 CPZ FSCN1 TMEM119 IFITM5 TRIM72 TGFB3 BGN BZW2 ATP2A1	1	163	MYL2 AMPD1 MYL3 KY CKMT2 AK1 CHAC1 COX7A1 CASQ1 CKM SCN4B COX7C ACTN2 TCEA3 NDUFS7 SYPL2 HRC PKIA PDK4 COX6B1 NDUFA4 TMEM38A TPM2 DCN UQCRH COX5A TNNT3 NDUFC1 NDUFA12 DBP UQCRB NDUFB3 S100A1 NDUFA5 SSPN UQCRC2 CAMK2B NDUFS3 NDUFA3 BGLAP PPP1R3C WFDC1 TMEM109 PHPT1 PYGM MYOM1 IGFBP5 CLIP4 REEP1 GMPR UQCRC1 ALAS2 SCARA5 NDUFA8 ATP1A2 GDF10 NFE2L1 SLC25A12 GPX3 CHCHD10 COX17 NDUFA1 EEF1A2 ASB2 SYP U…	0
drug:P2836:hormone-dn	16984	457	390	45	TNNC1 ATP2A2 NPPA TCAP RPL3L SOD2 CSRP3 GPC1 MYH6 HK2 NCEH1 HSPA9 MRPL42 ANKRD1 TIMM17A CORIN LBH CDK2AP1 MIF FKBP4 IVNS1ABP TRIM72 TMEM65 MRPL30 TGM2 PRPF19 MYBPHL POMP TNNI3 COL4A1 PPA1 GLG1 ADK MRPS17 ATP6AP1 PDRG1 GSPT1 PSMA4 COL4A2 PKP2 ACLY NSUN4 PFDN2 NRP1 SUDS3	1	226	MYL2 MYL3 FABP3 COX7A1 CKMT2 NDUFA4 NDUFB8 UQCR10 HSPB6 COX4I1 UQCRH COX5B COX7C RPLP1 UQCR11 UQCRC2 COX6B1 CHCHD10 FTH1 COX5A NDUFV1 UQCRC1 CRIP2 MYL4 S100A1 NDUFA6 ETFB NDUFA3 ACTC1 ACTN2 ACO2 MYBPC3 NDUFV2 OXCT1 HRC NDUFA10 NDUFA2 NDUFS7 NDUFA1 BAG3 UBB COX17 FHL2 RPS14 RPL9 RPS20 NDUFC1 CTNNA1 NDUFA12 ACADVL OGDH CRYAB HIGD2A DES NDUFA7 NDUFA8 EEF1A2 ASB2 HADHB DLST IDH3G ACADM GJA1 ETFA VEGF…	0
drug:P2831:hormone-up	16984	357	313	50	TNNC1 ATP2A2 RPL3L TCAP GPC1 CSRP3 NCEH1 MYH6 LBH IVNS1ABP CDK2AP1 TRIM72 FKBP4 ANKRD1 NPPA MIF CORIN PRPF19 GLG1 TIMM17A HK2 MRPL42 POMP ATP6AP1 TUBA1B CENPA ANKRD23 SPTB PRMT1 PKP2 SUDS3 PDRG1 BZW2 TNNI3 QRSL1 UACA PFDN2 TMEM65 TMEM201 MOV10L1 PSMA7 HAT1 ADK TGM2 TFRC DUSP7 USP13 MRPS17 MFN1 RABGGTB	1	155	MYL3 MYL2 CKMT2 HSPB6 FABP3 CRIP2 ACTN2 MYBPC3 HRC FHL2 ACTC1 CKM COX7A1 BAG3 OXCT1 DES S100A1 RPLP1 EEF1A2 ASB2 UQCRC1 NDUFV1 UQCR10 CRYAB COX4I1 MYOZ2 NDUFA2 CTNNA1 NDUFA3 COX7C NDUFB8 PKIA HSPB7 POPDC2 UQCRC2 SSPN NDUFA4 CLIP4 MGST3 CLU UQCRH RPS20 PFKM NDUFA6 NDUFA10 VEGFB NDUFV2 UQCR11 MYOM1 PARK7 RAB11B TMOD1 INPP5A COX10 NDUFS7 SLC8A1 HSPB8 HERPUD1 RPS14 FTH1 RPL9 RNF10 GJA1 CASQ2 KLHDC2 N…	0
drug:P2830:hormone-up	16984	354	305	49	TNNC1 NPPA ATP2A2 TCAP GPC1 RPL3L CSRP3 NCEH1 MYH6 TRIM72 ANKRD1 FKBP4 TUBA1B CDK2AP1 LBH CORIN MIF GLG1 MYBPHL HK2 MRPL42 IVNS1ABP ATP6AP1 POMP PRPF19 BGN TIMM17A SPTB IGF2 CENPA F2R ANKRD23 SUDS3 RPN2 PRMT1 HAT1 UACA TMEM65 TNNI3 PDRG1 PFDN2 PKP2 PSMA7 DUSP7 TMEM201 TFRC MFN1 QRSL1 UBAP2	1	158	MYL2 MYL3 CKMT2 HSPB6 FABP3 MYL4 ACTN2 COX7A1 CRIP2 RPLP1 HRC NDUFA4 MYBPC3 ACTC1 UQCR10 BAG3 NDUFB8 OXCT1 FHL2 DES CKM EEF1A2 CLU NDUFV1 NDUFA3 UQCRC1 CRYAB COX7C NDUFA10 RPS20 NDUFA2 UQCRH S100A1 COX5B UQCRC2 FTH1 ASB2 CTNNA1 COX4I1 SSPN UBB UQCR11 NDUFV2 RPL9 PARK7 NDUFA6 NDUFS7 PKIA RPS14 POPDC2 INPP5A VEGFB CLIP4 ETFB PFKM COX5A TMOD1 MGST3 HSPB7 RAB11B MYOZ2 CHCHD10 RABAC1 COX6B1 RNF10 EIF3…	0
drug:P2833:hormone-dn	16984	216	185	30	UCP1 ACACA ACLY ATP2A2 HK2 ENO1 S100A11 ANXA2 NPPA BPIFA1 SOD2 SLC24A3 CTSB FMO1 COL4A1 YWHAG TNNC1 SNX10 BGN SPARC TIMM17A YWHAB TMEM65 BTBD1 COL4A2 TCAP MRPL42 MYBPHL SLC1A3 GPX8	0.999994	105	CFD CIDEA COX7A1 IFI27 PDK4 ACO2 PNPLA2 HADHB FABP3 NDUFB8 CAV1 MYL4 GPX3 IDH3G RGCC GJA1 GPD1 ELOVL6 ACADM PLIN4 COX6B1 NDUFA1 COX17 COX5A ACTA2 ACADVL LETMD1 FHL1 CIDEC AOC3 UQCRB UQCRH CST3 COX8A IGFBP5 COX5B UQCRC2 UQCRC1 PRELP DLST CHPT1 NDUFV2 NDUFS3 COX6A1 OGDH ME1 GMPR ATP1A2 NDUFC1 ETFA UQCR10 NDUFS7 CIB2 COX4I1 ECI1 NDUFB3 AHCYL1 PDHB AGPAT2 UQCR11 OXCT1 NDUFS4 COX7C MYH11 CSRP2 TMEM109…	0
drug:P2832:hormone-dn	16984	222	191	31	UCP1 ACACA ACLY ATP2A2 ENO1 HK2 S100A11 CTSB SOD2 ANXA2 NPPA BPIFA1 SLC24A3 YWHAG COL4A1 BGN TNNC1 SNX10 FMO1 SPARC PYGL YWHAB TMEM65 TIMM17A COL4A2 TCAP BTBD1 HSPA9 MYBPHL GPX8 LOXL1	0.999996	108	CFD CIDEA COX7A1 IFI27 PDK4 ACO2 PNPLA2 HADHB FABP3 CAV1 MYL4 NDUFB8 GPX3 IDH3G ELOVL6 RGCC NDUFA1 GJA1 GPD1 ACADM PLIN4 UQCRB ACADVL ACTA2 COX5A COX6B1 FHL1 LETMD1 UQCRH CIDEC CST3 COX17 COX8A AOC3 COX4I1 PRELP IGFBP5 UQCRC1 UQCRC2 COX5B DLST ME1 CHPT1 ETFA COX6A1 NDUFS3 NDUFV2 TXNIP UQCR10 GMPR ATP1A2 OGDH PDHB CIB2 NDUFS4 NDUFS7 NDUFC1 AHCYL1 NDUFB3 OXCT1 ECI1 UQCR11 TMEM109 COX7C TPM1 MYH11 A…	0
drug:P104:1-methyl-4-phenyl-1,2,3,6-tetrahydropyridine|glycerophosphoinositol-dn	16984	390	360	64	ZIC1 VSNL1 TUBB3 GABBR1 CTNNB1 CIT SLC24A3 HSP90AB1 NSF YWHAZ GPI HPRT1 AHSA1 SEZ6L2 CRYM OLA1 TUBA1B MIF CCT4 TUBB RGS16 DDAH1 HSPH1 ZNF365 RAP1GDS1 POLR2B TBK1 PSMA1 NREP RAD21 HSPA5 RUSC1 BLCAP TRIM37 ARID5B HSP90AA1 MRPL42 HSPD1 OPN3 TPBG CDK16 CCT5 AP2B1 SUMO4 NKRF MAP2K1 XPO1 ZNF207 NRCAM GALNT14 DHX15 CHST1 SHOX2 TUBA1C THY1 PPP3CA FAM155A CDH12 FKBP4 BCL7A CCT2 STAU1 PPM1H YWHAB	1	171	NPTN SNAP25 STMN2 MDH1 NDRG4 UBB CALM2 NEFM UCHL1 NRN1 GOT1 MTCH1 ACTR10 SCG2 FKBP1B SH3GL2 INA RTN4 GDE1 TAGLN3 CAMK2B ATP6V1G2 MGLL KIT DYNC1I1 ITFG1 MGST3 UGP2 ATP6V0C TUBB2A FAM3C CALM3 REEP5 TSPYL4 NAP1L3 ARL6IP5 CFL1 GABRA1 MAP1B CALM1 RABAC1 SPHAR SLC25A3 CTNNA2 CYFIP2 TXNL1 LDOC1 PJA2 LRRC49 NELL2 OAZ1 CALY FGF13 RNF11 PVALB JTB CA11 ALDOC TSC22D1 GRAMD1B HINT1 OLFM1 HPCAL1 GAP43 SNAP91 L…	0
drug:P105:1-methyl-4-phenyl-1,2,3,6-tetrahydropyridine-up	16984	518	466	75	ANO3 CRYM ENC1 DDN TPBG COCH TMEM158 PPP3CA SLC1A3 DOCK4 BLCAP HOMER1 CHST1 CTNNB1 C4ORF46 HEY1 GPI MORF4L2 PABPC1 PPT1 BZW2 MIF PTDSS1 SYNDIG1 MAP2K1 TRMT5 PLK2 BCL11B IVNS1ABP PABPC3 RLIM CELSR2 THY1 FKBP1A PGBD5 OLA1 ATP6AP1 EGR4 PCDH17 PSMA1 FOXG1 HNRNPK NETO2 HOPX SET ARGLU1 SRSF9 PRMT1 HDAC2 R3HDM2 ACTR3B KTN1 SUPT16H PPA1 SNRPB2 PSMD14 BHLHE41 PAQR4 MYBPC1 TUBA1A TMEM74B CACNG4 CALB1 CA12 …	1	217	ARPP21 PENK LMO3 SPARCL1 HPCA EEF1A1 MTCH1 NPTN RPL32 TAC1 MEIS2 GPM6A RPS27A RPS20 UBA52 GRIA2 PRKCB WASF1 TSC22D1 RPS23 PPP1R1A COX7B ACTB RPL13A MXRA7 FAU PDE2A RPL11 RTN1 RPL27 RPLP1 RPS25 RPS24 NDUFA4 EIF4A2 CA11 OAZ1 CKB CALM2 PKIA CYP46A1 TPT1 RPS5 RPS13 ACTR10 CACNA2D3 EGR3 TPD52L1 SCG5 NDUFB1 TSPYL2 DDX5 RPL3 GPD1L RTN4 NDUFS3 COX6A1 CFL1 HBA2 YPEL5 RPS15 UBC PRKAR2B NPY CPE RPL4 NELL2 S…	0
drug:P102:1-methyl-4-phenyl-1,2,3,6-tetrahydropyridine-dn	16984	582	524	94	HSP90AB1 TUBA1B TUBA1C ZIC1 CTNNB1 TUBB3 MARCKSL1 TUBA1A NCL GABBR1 SLC24A3 CIT VSNL1 YWHAZ SPP1 HNRNPA2B1 MIF DPYSL2 GPI HSPD1 TUBB SLC6A1 DDAH1 CNP AHSA1 HIF1A CEP170 PTGES3 CCT4 BHLHE41 HSPA5 HSPH1 RGS16 ARID5B HSP90AA1 CANX HNRNPK PABPC1 RAD21 SLC1A3 POLR2B PSMA1 STAU1 DDR1 TBK1 HPRT1 SRP9 SPARC KTN1 VPS26A NPM1 XPO1 ZNF207 RAP1GDS1 RUSC1 CRYM CCT2 PDIA3 AGT DHX15 PSAT1 MRPL42 NONO NSF RLIM C…	1	257	RPL23A CST3 CRYAB CALM2 MORF4L1 RPL3 UBC PTGDS UCHL1 STMN2 EEF1A1 ACTB ALDOC CD81 NEFM MDH1 RPL32 CD63 VDAC2 CFL1 TUBA1A SLC25A5 RPS13 RPS23 RPS20 ITM2B SNAP25 OAZ1 RPS27A NDRG4 TPT1 SLC25A3 ENPP2 RTN4 RHOB EIF4A2 GLUL CHCHD2 RPL34 GOT1 ATP1A2 UBB KIF5C MXI1 GABARAPL2 RPS24 MTCH1 LMBRD1 SCG2 MAP1B UGP2 SERF2 ACTR10 TUBB2A NFE2L2 PAQR6 INA RPS3A RPL13A COX6A1 SPCS1 NCOA4 PFKM RNF11 JTB RABAC1 GDE1…	0
drug:P103:1-methyl-4-phenyl-1,2,3,6-tetrahydropyridine|glycerophosphoinositol-dn	16984	421	387	69	ZIC1 VSNL1 GABBR1 TUBB3 MIF CIT SLC24A3 CTNNB1 NSF YWHAZ HSP90AB1 GPI HPRT1 OLA1 CCT4 CRYM SEZ6L2 BLCAP HSPH1 TUBB RGS16 HIF1A PSMA1 RUSC1 RAD21 AHSA1 RAP1GDS1 DDAH1 POLR2B SUMO4 NREP CHST1 ZNF365 MRPL42 PDIA3 TRIM37 CDK16 ARID5B UBE2NL KPNA3 AP2B1 CEP170 NKRF TBK1 OPN3 KBTBD2 THY1 MSL1 PGBD5 SNX10 XPO1 ZNF207 RNF44 SRP9 YWHAB ENC1 HSPA5 MFSD2B DBNDD1 CRLF3 TPBG BCL7A UBE2Q1 GALNT14 TTI2 NRCAM SH…	1	189	NPTN STMN2 UCHL1 SNAP25 MDH1 NDRG4 EIF4A2 CALM2 NRN1 ACTR10 GOT1 INA NEFM MTCH1 SH3GL2 TUBB2A SCG2 KIF5C FKBP1B RNF11 ALDOC NAP1L3 VDAC2 TSC22D1 CHCHD2 ATP6V1G2 TAGLN3 DYNC1I1 VAPA MAP1B CAMK2B GDE1 GABRA1 EEF2 MGLL TSPYL4 ITFG1 RABAC1 KIT CALM3 CALY FGF13 ATP6V0C FAM3C UGP2 CYFIP2 SPHAR TSPAN7 TXNL1 PIP5K1C AP3S1 SLC9A6 LRRC49 HK1 OXT CALM1 CTNNA2 LDOC1 OAZ1 SLC25A5 JTB NELL2 GPM6A PFKM SNCB SKP…	0
drug:P5795:dimethyl sulfoxide|methapyrilene|hydrogen chloride-dn	16984	377	298	49	PAH AHCY CRP C3 UBD RBP4 HRG ACLY HP APOH FETUB F2 BBOX1 HSP90B1 PLG RPL22L1 HSPA5 MIF FGL1 ASS1 IGF1 ADK BAAT CYP1A2 ABCB11 PROC SHMT2 CPB2 NIT2 HMGN1 FN1 C4BPA TTPA RCL1 HSPD1 LOX ITIH1 NDUFA4L2 F12 DHCR7 KRT18 AHSG PSAT1 ASGR1 DPYS SOD2 FABP7 VMP1 CUL4A	1	150	BHMT BHMT2 SULT1A1 ALDOB SELENBP1 EIF4EBP3 SULT1B1 ACSM1 CYP1A1 PHYH HPD PECR GAMT UGT2B15 CDO1 SLC37A4 PIGR MGST3 RARRES2 GNMT P4HB CYB5A DECR1 FBP1 UGT2B17 GSTA5 PTGR1 CAT CHPT1 GSTA4 GSTA3 UGP2 HSD17B11 CYP27A1 ANGPTL3 BPHL ALDH1A1 TM4SF4 CTH PODN F10 PGRMC1 EPHX1 ITM2B GSTM1 ALDH3A2 CMBL ADTRP PDHB APOC3 QDPR FABP1 GSTA1 PXMP2 SKP1 SERPINC1 APOA4 RNASE4 BTG1 AKR7A3 TSPO ALDH1L1 CDK2AP2 FGA ST…	0
drug:P5792:dimethyl sulfoxide|methapyrilene|hydrogen chloride-dn	16984	346	264	37	UBD S100A11 CRP HPRT1 PSAT1 IFI30 NIT2 NDUFA4L2 VMP1 HP RBP4 TMEM33 CUL4A PROC F2 TNFRSF12A PFKP SERPINE1 SRP9 CXCL16 APOH PCNA PAH CACYBP NEURL3 SET GJB2 IGFBP1 AHCY CPB2 POLR2D HEXB SQLE TMEM123 LACTB2 LAMP2 CREG1	1	137	BHMT SLC25A4 CYP1A1 UGT2B17 GSTM3 EPHX1 PECR GSTA4 GSTA5 SERINC1 DECR1 SULT1B1 ACADL CST3 MGST3 HIGD1A CYB5A BPHL GSTA3 ATF4 CHCHD10 RCAN1 PODN UGP2 CD36 CMBL ITM2B SELENBP1 PIGR UQCR10 HSD17B11 BHMT2 SLC25A20 GLRX GSTA1 CAT CIDEA GAMT TMEM37 ALDH1A1 PDHB ADTRP ACSM1 HERPUD1 APOA4 CHPT1 PGRMC1 ZFP36L1 TMEM59 ATP6V0C PCYOX1 TMEM14C ISCU DNAJB9 MYL12A PHYH YJEFN3 RHOB INSIG1 PPA2 UQCRB IDI1 RPL10 R…	0
drug:P2817:hormone-up	16984	381	329	45	TNNC1 ATP2A2 TCAP RPL3L GPC1 HK2 CSRP3 MYH6 NPPA SOD2 ANKRD1 CDK2AP1 LBH MRPL42 TRIM72 NCEH1 TUBA1B TIMM17A CORIN HSPA9 PRPF19 TMEM65 ATP6AP1 CENPA POMP IVNS1ABP FKBP4 GLG1 TGM2 BGN TNNI3 ANKRD23 PDRG1 SPTB MRPL30 COL4A2 PRMT1 COL4A1 MRPS17 BZW2 ANXA2 RABGGTB UACA SUDS3 QRSL1	1	176	MYL3 MYL2 FABP3 CKMT2 HSPB6 COX7A1 NDUFB8 UQCR10 FTH1 COX4I1 NDUFA4 RPLP1 CRIP2 UQCRH UQCRC2 ACTN2 UQCRC1 COX5B NDUFV1 ACTC1 UQCR11 HRC MYBPC3 CHCHD10 BAG3 S100A1 COX7C COX6B1 COX5A FHL2 GJA1 CKM NDUFA3 ETFB NDUFA6 DES NDUFV2 NDUFA10 NDUFS7 NDUFA2 ACO2 RPS20 EEF1A2 ASB2 RPL9 RPS14 SSPN MYOZ2 CTNNA1 PPP1R3C CST3 OXCT1 UBB ACADVL COX17 NDUFA1 OGDH HADHB CRYAB POPDC2 HSPB7 NDUFC1 VEGFB PKIA NDUFA7 C…	0
drug:P2816:hormone-up	16984	394	340	52	TNNC1 NPPA ATP2A2 TCAP GPC1 RPL3L HK2 CSRP3 SOD2 MYH6 ANKRD1 BGN TUBA1B ACLY MYBPHL TRIM72 CDK2AP1 MRPL42 CORIN LBH HSPA9 NCEH1 ATP6AP1 TIMM17A TMEM65 FKBP4 ANXA2 GLG1 POMP CENPA ACACA UCP1 IGF2 PRPF19 COL4A1 SPTB TGM2 TNNI3 COL4A2 ANKRD23 LOXL1 SPARC PDRG1 IVNS1ABP GSPT1 MORF4L2 SUDS3 RPN2 MRPL30 UACA PRMT1 C3	1	180	MYL2 MYL3 FABP3 CKMT2 COX7A1 HSPB6 MYL4 NDUFA4 RPLP1 NDUFB8 UQCR10 FTH1 COX5B UQCRH COX4I1 ACTN2 UQCRC2 CRIP2 CHCHD10 UQCR11 NDUFV1 HRC UQCRC1 COX6B1 ACTC1 COX5A COX7C NDUFA10 BAG3 ETFB CFD MYBPC3 NDUFA3 UBB RPS20 ACO2 NDUFS7 NDUFV2 GJA1 NDUFA6 RPL9 S100A1 NDUFA2 RPS14 DES FHL2 CKM COX17 EEF1A2 CST3 CTNNA1 SSPN ASB2 CLU PNPLA2 OXCT1 CRYAB PPP1R3C NDUFA1 VEGFB NDUFC1 OGDH INPP5A POPDC2 HADHB EIF3F…	0
drug:P2815:hormone-up	16984	372	323	47	ACLY UCP1 ACACA HK2 SOD2 CTSB APOC1 ENO1 ANXA2 HP BGN C3 PPA1 PYGL S100A11 HSPA9 ATP2A2 SLC24A3 TNNI2 SNX10 SPARC YWHAG EIF4EBP1 ATP2A1 COL4A1 ELN MRAP LOXL1 COL4A2 TGM2 NPPA MRPL30 TMEM79 TCAP SMOC1 SLC1A3 TUBA1B IFITM3 PGM2 TNNC1 MORF4L2 MRPL42 FASN SLC25A19 GPX8 YWHAB TIMM17A	1	176	CFD CIDEA IFI27 FTH1 COX7A1 PDK4 PNPLA2 COX5B UQCR10 CHCHD10 NDUFB8 NDUFA4 COX6B1 COX8A ACO2 UQCRH COX6A1 HADHB COX5A COX4I1 UQCR11 NDUFA1 RPLP1 CDO1 CST3 CAV1 ETFB COX17 ACSL5 ELOVL6 ACADVL COX7C UBB RPS20 ETFA GJA1 ACTA2 PLIN4 UQCRC2 GPD1 IDH3G NDUFV1 UQCRC1 NDUFA6 RGCC FABP3 NDUFS7 UQCRB RPS14 NDUFA3 AGPAT2 CIDEC RPL9 AOC3 PRELP ECI1 NDUFV2 ACADM NDUFA10 TXNIP NDUFA2 ATP1A2 UBC LETMD1 MYL6 ADI…	0
drug:P2814:hormone-up	16984	292	254	42	UCP1 ACLY ACACA HK2 ATP2A2 HP ANXA2 C3 APOC1 PYGL BGN PPA1 SLC24A3 ENO1 NPPA BPIFA1 SOD2 EIF4EBP1 SPARC S100A11 TUBA1B SNX10 CTSB MRAP TCAP ELN LOXL1 GPX8 YWHAG SLC1A3 TNNC1 COL4A1 SMOC1 NRP1 IFITM3 FASN COL1A1 COL4A2 GPC1 HSD3B7 MYBPHL MORF4L2	1	135	CFD CIDEA COX7A1 IFI27 PNPLA2 PDK4 ELOVL6 FABP3 ACTA2 CAV1 PLIN4 GJA1 HADHB ACO2 AGPAT2 CDO1 CIDEC ACADVL ACSL5 MYL4 PRELP COX6B1 AOC3 GPD1 CST3 RGCC DCN CHCHD10 LETMD1 GSTO1 COX5B FTH1 MYH11 UQCRH ATP1A2 UQCRC2 PPP1R3C COX17 UQCRC1 ECI1 COX5A NDUFS7 TPM1 ACSL1 IDH3G COX4I1 NDUFA1 ETFB NDUFB8 RPLP1 CIB2 DLST NDUFA4 NDUFV1 ANXA6 TXNIP RPS20 ADIPOR2 HSPB6 CSRP1 RPL9 UQCR11 NUPR1 NDUFV2 MYLK CRIP2 U…	0
drug:P2819:hormone-dn	16984	449	369	47	MIOX ASS1 GRINA MIF SLC6A6 CTSB FMO1 S100A11 SFXN1 ARL6IP1 CDH16 TUBA1B SPP1 NUDT19 CLDN2 SLC22A6 HSPA9 RGS16 HSPD1 ENO1 SAMD9L GRB7 SOD2 NOX4 ANXA2 LAMP2 NUDT4 HMGN1 TIMM17A MTHFD1 PAH CYP7B1 NCEH1 IGFBP7 CTNNB1 GM2A CYP24A1 NPM1 CYB5B MRPL50 PSMA4 GNS FKBP4 ATP6V1A ATP6AP1 YWHAB SLC22A12	1	196	GPX3 UBB RPLP1 TMBIM6 FTH1 ACY3 SLC25A5 RPS20 DBP NDUFA4 AKR1A1 PDZK1 UQCR10 CHCHD10 COX5B COX8A RPL10 CYP4B1 ALDOB RPL9 NDUFB8 COX4I1 NDUFA1 RPL37A BDH2 INMT RPS14 CRYAB COX7C DNASE1 RPL5 UQCRH COX6B1 COX5A LRPAP1 ISCU ALDH2 HERPUD1 RPS8 TMBIM4 GLYAT KHK KLF9 UQCR11 COX6A1 ABHD14B NDRG1 PRDX5 RPS27L PARK7 UQCRC2 WBP2 ACADM UBC HINT2 HIGD2A GUCA2B FBP1 MRPS6 RPS25 OXCT1 RPL35A SELENBP1 SOD1 UQCRB…	0
drug:P2363:ethanol-dn	16984	246	217	34	CP PDIA3 GJB2 PPA1 SFXN1 GSPT1 IGFBP7 GLS2 HSPD1 EBPL TRAM1 PSME4 GM2A GLDC RCL1 PTPRE DPAGT1 SQLE PDP2 PSMB2 COPB2 TMEM38B ITGB5 CLDN12 TTC39C ELAVL1 CHUK FPGS FAS ZDHHC9 GNS MTDH SLC6A6 PTBP1	1	118	GSTM1 DBI CHCHD10 ALDH2 TMBIM6 ERRFI1 C8G GSTZ1 SCP2 EPHX1 STARD10 RPS27L BLVRB RPL36AL RNASE4 SLC25A5 ABHD14B ETFB VKORC1 ETFA NDUFA4 PTTG1IP ACSS2 TMEM14C GPT SLC6A13 CCS GRHPR ALAD GSTK1 RETSAT ALDH1L1 EPHX2 UQCR10 SLC25A15 ECHS1 CHP1 ACADVL GSTO1 XBP1 ADH5 IQGAP2 ENTPD5 ME1 HAGH ZFYVE21 HADHB SUCLG2 RPL37A ALDH6A1 HINT1 STBD1 EDF1 PSME1 CCDC107 HMGCL SEMA4A SURF4 NUBP1 MSRB1 SSR2 SEL1L XDH HB…	0
drug:P2362:ethanol-dn	16984	247	217	34	CP PDIA3 PPA1 GJB2 SFXN1 IGFBP7 GSPT1 GLS2 HSPD1 EBPL TRAM1 PSME4 GLDC GM2A RCL1 PTPRE SQLE DPAGT1 PDP2 COPB2 TMEM38B PSMB2 CLDN12 TTC39C CHUK ELAVL1 ITGB5 FPGS GNS ZDHHC9 FAS MTDH SLC6A6 PTBP1	1	117	GSTM1 DBI CHCHD10 ALDH2 TMBIM6 ERRFI1 C8G GSTZ1 SCP2 EPHX1 STARD10 RPS27L BLVRB RPL36AL SLC25A5 RNASE4 ABHD14B ETFB VKORC1 ETFA NDUFA4 PTTG1IP ACSS2 TMEM14C GPT SLC6A13 CCS GRHPR ALAD RETSAT GSTK1 ALDH1L1 EPHX2 SLC25A15 ECHS1 CHP1 ACADVL GSTO1 ADH5 IQGAP2 UQCR10 HADHB ENTPD5 ME1 XBP1 HAGH ZFYVE21 SUCLG2 ALDH6A1 EDF1 STBD1 SEMA4A PSME1 HMGCL RPL37A NUBP1 MSRB1 CCDC107 SSR2 SURF4 XDH SLC25A1 GABARA…	0
drug:P849:cobamide-up	16984	496	371	60	APOA2 C3 APOC1 PAH APOE AHCY PLG AHSG HP APOF IFITM3 RBP4 HRG MAT1A F2 SLC38A4 HAMP KNG1 FASN SERPINA6 SDS AGT GLS2 ITIH2 SERPINF2 PROC ELOVL2 HSPD1 RPL22L1 GRN SERPINA11 CYP1A2 INO80 BST2 PYGL COL18A1 IGFBP1 FETUB SREBF1 PGK1 ASGR1 MARC1 RNF149 SEC61G FADS2 SERPINA10 APOH ABCB11 KMO KRT18 SAA1 F5 HAL C9 HSD3B7 AMACR C1QBP PSMA7 DHCR7 GRINA	1	184	ALDOB FBP1 HPD FGA KXD1 B2M EEF1A1 APOC3 APOA1 FABP1 TTR PHYH GNMT FTH1 GOT1 CHCHD2 SERPINC1 RPS29 RPL10 SULT1A1 UBA52 RNASE4 SDHB OAT CAT RPLP1 INMT COX6B1 ACSL5 CHCHD10 TAT RPL4 MARC2 RPL3 SELENBP1 PGRMC1 CLU RPL13 FAU TTC36 CYB5A RGN COX6A1 RPL18A SLC37A4 RPL27A ETFA SLC2A2 UQCR11 RPLP2 QDPR KHK DBI HEBP1 LGALS9 IFI27 RPS15 RPL11 P4HB RPS5 BHMT PIGR PM20D1 BCKDHB G6PC C8G RPS11 ME1 PCYT2 UBC F…	0
drug:P848:-up	16984	447	346	53	PAH ELOVL2 C3 AHCY FASN HAMP IGFBP1 IFITM3 SERPINA6 AHSG SDS GLS2 APOF SLC38A4 RPL22L1 F2 SEC61G NNMT PYGL PLG KNG1 FADS2 CYP1A2 ABCB11 MARC1 SERPINF2 ITIH2 LACTB2 DHCR7 HSP90B1 ITIH1 PROC IGF1 HSPD1 ASS1 BST2 SERPINA10 RPN2 POMP APOC1 PAICS RCL1 NIT2 HRG C9 SCO2 PDCD5 RNF149 CLDN12 COL18A1 RGS16 CRP PSMA7	1	166	GOT1 CTH ACSL5 RNASE4 QDPR TAT SELENBP1 RPS29 FGA RPL32 INMT PNP NDUFA4 RNF125 OAT ME1 RPL36AL FAU SDHB GSTZ1 COX5A SULT1A1 GSTK1 RPL3 UQCRB COX7A2 BCKDHB RGN HEBP1 ECHS1 RPL4 TTC36 HACL1 UBA52 HINT1 RPLP2 METTL7B ABCG5 FBP1 IFI27 TMEM14C KHK UQCR11 COX6B1 PIGR F13B G6PC TMBIM6 GABARAPL1 RPLP1 ENPEP SAR1B P4HB PGRMC1 AASS DBI SLC2A2 UQCRH SUCLG1 B2M ETFA NDUFA8 HAAO EEF1B2 ALDH6A1 UQCRC1 PFN1 APO…	0
drug:P842:Congenital pure red cell aplasia-dn	16984	364	251	43	C9 APOC1 HP CFHR1 APOE TTPA DIO1 SERPINA11 C4B RBP4 PLG APOA2 INO80 SLC22A1 HSD3B7 SERPINA10 NIT2 ASGR1 LAMP2 CRP GJB2 KMO SAA1 DNAJA1 SERPINF2 F12 OBP2A HSPD1 FGL1 LIPC IGF1 AMACR BBOX1 ELOVL3 PSMA4 PPA1 BCCIP HOPX HSPA5 LGALS8 AQP9 PNPO PDCD5	0.999999	137	FABP1 BHMT CYB5A APOA4 APOA1 RPL26 ALDH1A1 APOC3 PEBP1 RPLP1 TTR PHYH PGRMC1 RPL31 RPS14 RPL34 FABP2 FGA NDUFA1 CHCHD2 DCT ANGPTL3 P4HB NDUFB11 CDO1 RPL27A ALDOB KXD1 STARD10 AADAC RPS27A B2M GPX4 SDHB ALAD RPS15 RPL10 EHHADH COX4I1 RPS5 NRN1 CD81 RPS23 HAGH RPL13 EPHX2 RGN RPL18A RPL4 CHCHD10 RPL23A HINT1 CMBL FAU ACAT1 VNN1 RPS27L MSRB1 HSD17B2 ETFA ECI1 ADH4 VKORC1 CAT SERP1 EIF4A2 EPHX1 RPL11…	0
drug:P4328:conjugated linoleic acid-up	16984	412	363	50	SPARC ASS1 SCD DPYSL2 TUBA1A UBA2 PYGL PLS3 TUBB YWHAZ C3 LRP11 ACLY GPI CDK2AP1 MTHFD1 SLC19A3 GOLPH3 COL6A3 PCOLCE HSP90AB1 MARC1 HNRNPK IFITM1 NMB MXRA5 TOMM20 SRSF9 FKBP9 NONO STAU1 IFITM3 ACVR1 PABPC3 TUBA1C RLIM EIF2S3 IGFBP3 PPL DAP3 RAD21 IARS2 RBP4 COL4A1 SLC24A3 SMNDC1 OSR2 CD55 AMIGO2 ARL6IP1	1	189	ALDH2 RPL4 UBC FHL1 SPARCL1 TXNIP CFD ACTB AOC3 TUBA1A MFAP5 GYPC TPT1 DPT RPL3 AKR1C3 PGM1 ALDH1A1 SRPX RPL11 RNF11 PCOLCE2 SLC25A6 SLC25A3 DCAF6 RPL23A IGFBP6 CD99 ECHS1 RPS11 MYL9 RPL32 RPL13A RPS8 HADH SRP14 CRYAB ENPP2 PPP1R14A SLC25A1 GNG11 VAMP3 NUPR1 PPP1R1A CHRDL1 ITIH5 CIDEA CCNG1 PRDX6 PFN1 PHYH GLUL PARK7 HERPUD1 RETSAT RPL29 GNAI1 MGLL ACSS2 GJA1 PLIN1 STRADB MORF4L1 ITM2B CYB5R3 VDA…	0
drug:P4920:-dn	16984	313	269	30	APOE HSPA1B COL1A2 IGFBP3 TGFBI COL1A1 SFRP2 SPARC COL3A1 COL5A2 FAM25A IGFBP7 PFKP SPON2 PLA2G2A CTSB CLSTN1 GPNMB IRF2BP2 SPTAN1 SHB USP10 LAPTM4B UPK1A GPX8 FNDC1 HMGN1 PPT1 UPF2 LMCD1	1	156	HBB MRVI1 PRNP MYL9 KLF9 GSN FLNA SPARCL1 DCN SYNM TXNIP PGM5 RPL9 CST3 CSRP1 SLMAP LIMS2 DPT IGFBP6 SH3BGR COX4I1 HBA2 LAMB2 GDA SULT1A1 MFAP5 RPL34 PDLIM3 NACA TAGLN XDH RPL27A RPS6 RPS14 RPL31 RPS15 MAP1LC3A TPT1 RPS20 RPS23 TSC22D3 SNCG SCN7A RPS8 RPL10 GPX3 RPL5 FOS ITGA1 ADAMTSL4 RPS5 DYNC1LI2 PRSS23 HSPB6 CFD PMP22 COX7A2L DES CD63 RPS11 FAU RPS3A IFI27 CD81 MAMDC2 RPLP1 FOXP2 NPTN ANO6 FB…	0
drug:P4923:-up	16984	568	502	87	UPK3A UPK1A KRT7 KRT18 KRT15 TNNT2 S100A11 STMN1 ENO1 ZWINT SLC20A1 HMGN1 TUBA1B ARPC1B SET MORF4L2 TC2N CCT4 PCNA PLA2G2A COL1A1 CCT3 SERBP1 HNRNPK YWHAB CLDN4 ARPC5 FAM120A CCND1 CTNNB1 CRABP2 MYOF TACSTD2 COL1A2 SLC12A7 IGF2R TCP1 COL3A1 RAN AP1S3 GRN M6PR IFITM3 YWHAZ TSPAN6 SEC61G COPA SYT8 KRT5 CLDN8 LAMP2 G6PD GJB6 PGK1 HNRNPH1 CPD PTGES3 RPL22L1 POMP NONO HSPD1 CLTC TMX1 S100A10 DNAJA1 RB…	1	222	FABP4 UPK1B GSTM1 CLU UCHL1 MGST3 CTSE ID1 CD63 MAL LGALS3 MGST2 PFN1 NQO1 NDRG2 COX4I1 CALD1 RPL9 COX8A OAZ1 PEBP1 GLRX FTH1 ITM2B RPL13A UROD SLC25A3 P2RX1 GSTA4 RPL4 GSN RPS9 UBB CRIP2 RPL31 FAU RPS6 MYL12A ACADL ACOX1 SYNM FXYD3 RAMP1 TMBIM1 RPS8 RNASE4 CD151 MORF4L1 SKP1 CFL1 TMEM30B EEF2 VAPA B2M COX5B RPLP1 SLC25A5 CAPNS1 RPL3 SH3BGR RPS23 TXNIP MRFAP1 ATP6V0C AKR1A1 RPL6 COX7C ID3 TMEM59 …	0
drug:P4922:-dn	16984	215	179	11	APOE HSPA1B IGFBP3 PPT1 GPNMB SFRP2 RBM39 UPK1A UPF2 DAB2 SERPINB9	1	112	TXNIP SPARCL1 CST3 MYL9 SYNM EGR1 MRVI1 ART3 SULT1A1 B2M SLMAP PRDX5 HBB RPL9 PGM5 FBXL22 SNCG CSRP1 MYH11 RGS2 FLNA LIMS2 ID3 GDPD2 COX7A2L RPL26 CNN1 MT1A ITGA1 COX4I1 KCNIP2 RPL5 RPS27A RPS14 RPS6 FAU DES PRSS23 EMID1 ACTG2 RPS29 RPS5 RPS3A SUN2 RABAC1 RPL27A PDLIM3 FOXP2 GLUL PIGR SH3BGR RPS8 FXYD1 RPLP1 ASB2 MAP1LC3A RPL4 TPT1 EPHX1 CTSE UPK1B WNT4 DMPK NACA SCNN1B EIF3G AHNAK ATF4 CAPN13 CD…	0
drug:P4037:retinoic acid-dn	16984	567	516	114	SERPINE2 TUBA1B IGFBP7 TGFBI COL1A2 COL1A1 TIMP1 TUBA1A TUBA1C S100A10 GREM1 THBS2 SEC61G TUBB IFITM3 COL5A1 ENO1 DPYSL2 DAB2 SERPINH1 LOX BGN PGK1 COL4A1 MYH9 COL6A3 PLOD1 TNFRSF11B DKK1 THY1 MIF ITGA11 VASN LUM IL18 PABPC1 PPP1R14B PCOLCE IFI6 SPARC NUAK1 TPD52L2 ARID5B SRSF9 LY6E MYOF CALU NNMT FOXD1 NAA38 CCND1 MORF4L2 CCT2 ATP6AP1 IGF2R STC2 ZNF486 HSP90AB1 DNAJB11 IGFBP3 SNRPG PRMT1 GLG1 AS…	0.999974	235	ACTA2 EEF1A1 TPT1 RPS29 RPS25 OAZ1 ACTB RPL27 RPS15A CD81 TUBA1A MYL6 RPS11 RPS24 RPS27A RPS20 RGS4 IGFBP5 RPL31 RPS6 RPL11 UBA52 RPS14 RPL35A NDUFA4 COX4I1 RPL5 SERF2 RPLP2 RPL36AL UBC FAU HSPB6 FLNC DCN CCNI PTX3 CFL1 RPS5 NDUFA1 UBB RABAC1 CSRP2 DNAJC28 TOMM7 RPS13 EMP3 MFAP4 B2M COX7A2 ADAMTS1 NME4 TXNIP RPS9 KLF2 CALM3 CSRP1 PFN1 CAP1 VDAC2 PPP1R3C RPL9 P4HB BNIP3 MANF MYL9 EEF2 RPS27L COX5B…	0
drug:P4460:oxygen atom|2-butoxyethanol-up	16984	561	418	70	MAT1A SDS PAH APOC1 AHCY PLG CXCL1 FASN APOE IGFBP1 PYGL SLC38A4 RBP4 HSPD1 APOA2 SREBF1 APOF IFITM3 TTPA CREG1 HRG ASGR1 SAA1 CRP ITIH2 KNG1 NNMT CYP1A2 SERPINA6 C3 PROC ELOVL2 SLC25A22 INO80 NIT2 LIPC PAICS GLS2 AGT AHSG F12 LACTB2 GJB2 FN1 RNF149 HSP90B1 MARC1 C1QBP RPL7 PGK1 SLC25A13 FMO1 PSMA4 HSP90AB1 AMACR BHLHE40 HSPA5 KRT18 CHDH F5 F2 PDE3B LAMP2 PERP DNAJA1 POMP COL18A1 PPA1 SMOC1 USP10	1	213	TAT ALDOB INMT GOT1 CYB5A RGN HPD FTH1 CDO1 SERPINC1 RPL31 APOB ERRFI1 EHHADH SULT1A1 GNMT SLC2A2 ACSL5 EEF1A1 ALDH1A1 FBP1 APOC3 OAT CTH AASS KXD1 QDPR MARC2 CHCHD2 RETSAT ACADM RPS27A DBI PHYH RPL23A RPL10 COX4I1 RNASE4 PGRMC1 AADAC RPL4 RPS23 ME1 UQCRC1 ACOX1 EPHX1 P4HB GSTA3 HERPUD1 CHCHD10 ETFA COX6A1 OAZ1 NDUFA1 SDHB RPL10A GSTM1 UBA52 RPS29 TMBIM6 NRN1 EPHX2 ANGPTL3 UQCRC2 KHK FGA NDUFA4 A…	0
drug:P4684:-dn	16984	317	293	53	CP COL3A1 BGN RPL7 LAPTM4B GPNMB TM4SF1 PDGFRB IGF1 ANXA1 S100A10 ANKH DPYSL2 TGFB3 ITGBL1 CTSB CTNNB1 CCT2 C1QTNF5 SLC6A6 RBMS2 ASAH1 PAICS FKBP9 TNFRSF11B NONO NPM1 COL1A2 ITGB5 RCN1 ADD3 CTHRC1 COL1A1 CCT5 HPSE SFRP4 PLS3 CCT4 APOE HTRA4 C4B PCOLCE RIN2 CDH13 LBP PLXDC2 CTSK GPC3 SERPINH1 GJA5 ATP2A2 NOB1 PABPC1	0.999999	150	GSN SPARCL1 GPX3 TIMP3 CST3 CXCL12 TXNIP PDCD4 ITM2B RPS29 SLC25A4 PRELP CAV1 EEF1A1 CCNI NUPR1 RPS6 RPL9 KCNMA1 RPL10 GYG1 RPL11 RPL13A UBB RPS5 RPS8 RPLP1 OLFML3 RPL29 METTL7A RPL32 CLU EMP1 RPL37A DPT CDO1 RPL34 RPL3 EIF4B RPS3A GADD45A RPS27A MATN2 RPS14 GABARAPL1 PDK4 FGL2 USE1 VKORC1 MFAP4 MYH11 COX7A2L SERPINB6 EEF2 PRNP TMEM140 XDH RPLP2 C7 CRISPLD2 NDRG2 CALD1 RPS20 RPL5 RPL31 RPL10A LGA…	0
drug:P5751:bis(2-ethylhexyl) phthalate|dimethyl sulfoxide-up	16984	334	274	34	CRP LACTB2 FER1L5 PSMA1 MAL2 SERPINE1 SLC25A13 ASGR1 SHMT2 MARC1 VMP1 PSAT1 CHUK ABCB11 TTPA ADK MOSPD2 AGT SRP9 PDE3B BCAP31 TMEM33 SRD5A1 MIOX LAMP2 SERPINE2 EBPL F2 DHCR7 PSMA4 TGM2 CXCL9 BBOX1 SSR1	1	153	FABP1 EHHADH GSTA5 ACOX1 ECI2 HACL1 HSDL2 PCTP ABCD3 DECR1 HSD17B4 VNN1 HADHB GSTA4 ADTRP ACADM EPHX2 RETSAT ALDH1A1 TXNIP GPD1 OAT DBI CMBL SAR1B TMEM14C ACO1 MOCS2 FBP1 PHYH AGMO NUDT7 MTTP PODN SLC25A20 INSIG1 ACOT12 ACADVL ETFA CHPT1 CPT2 SLC6A13 SERP1 ACOT2 PDHB CREB3L3 CD36 CYB5A CIDEA PDK4 PPCS PEX11A MSMO1 SUCLG1 ME1 GLRX HIBCH ACO2 MRPS18A ACADL ETFDH PECR CHCHD10 SLC22A18 BHMT DAD1 ALAS…	0
drug:P5752:dimethyl sulfoxide-dn	16984	335	281	45	PAH ACLY ADK F2 C3 HAMP KRT18 RCL1 PLG RBP4 MAT1A HP ABCB11 ASS1 IVNS1ABP DCAF13 IGF1 RDH16 FGL1 SERPINA10 VMP1 TFRC APOH SPTAN1 ASGR1 GPI SLC38A4 POLG2 GRINA TTPA SERPINF2 ITIH2 CHDH CFHR1 CLDN1 PROC CRP BBOX1 SLC25A13 FGF21 PYGL APOA2 NIT2 ISG15 SLC25A29	1	142	SULT1A1 BHMT SULT1B1 ALDOB CDO1 BHMT2 SLC37A4 FGA PIGR ACSM1 SLC2A2 CYP27A1 APOA4 PHYH FBP1 GPC4 MGST3 BTG1 ERRFI1 UGP2 SORBS2 ADTRP TAT TM4SF4 PECR DBI PDHB ETFB ECHS1 SEC61B ATP6V0C TMEM37 SLC25A4 SUCLG1 HPD SERPINC1 GPT CDH2 MTTP HIGD1A ACTB GAMT SEC22B DECR1 COX7B ALDH1A1 CMBL RARRES2 GSTM3 IFI27 GSTZ1 ALDH3A2 HSD17B6 PODN HERPUD1 STBD1 BPHL CHCHD10 SKP1 F10 ABHD14B MSRB1 LGALS9 COX8A MGST2 T…	0
drug:P5756:hydrogen chloride|dimethyl sulfoxide|chlorpromazine-dn	16984	463	372	54	HP RBP4 PLG APOH AHSG APOC1 F2 HRG HSPA5 FETUB C3 PAH MIF KRT18 APOA2 SHMT2 ENO1 CTSB HMGN1 BST2 ACLY ADK FGL1 GPI PSMA7 HSPD1 AGT SEC61G IGFBP1 ABCB11 BBOX1 RCL1 MTHFD1 SERPINF2 ITIH2 LRRC8D FAM120A ASS1 CREG1 NDUFA4L2 HNRNPK FABP7 F12 DAO RPN2 CTNNB1 HSPA1B DCAF13 YWHAG SRD5A1 ASGR1 PROC DSG2 HSP90B1	1	195	GSTM1 BHMT SULT1A1 APOC3 TTR SULT1B1 TSPO PGRMC1 RPS5 APOA4 EPHX1 GSTA1 ALDOB FTH1 ACTB RPS29 HPD RPS23 PIGR IFI27 FAU PHYH TPT1 RPL31 RPL9 ACSM1 BHMT2 P4HB DBI RPL10 UBC HSD17B11 MT2A RPL26 SERPINC1 RPLP1 SLC37A4 APOA1 HMOX1 CHCHD10 ITM2B CHCHD2 RPS13 RPS6 RPL27A GPT MGST2 ACADL NDUFB9 CD81 COX8A RARRES2 RPS25 ERRFI1 MGST3 ISCU FGA CYP27A1 SOD1 CAT SKP1 PTGR1 RPS14 CDO1 RPL5 ALDH1L1 SLC2A2 ETHE1…	0
drug:P4485:biotin|cyclosporin A|phosphoprotein phosphatase inhibitor-dn	16984	354	284	42	CALB1 IGFBP7 MIOX LRP2 CRYM ENO1 LACTB2 PAH AMACR ASS1 CTSB DAO AHCY COL3A1 LYPLA1 OSBPL8 AQP2 OPLAH SLC15A2 IGFBP3 SLC39A8 CDH16 MCCC2 DDAH1 GGH GPI SPARC HSPD1 FAM111A DHCR7 MIF SLC22A6 SLC25A30 PSAT1 ATP6V1A KDR RARRES1 RDH16 TNFRSF11B CLTC GGCT COL1A2	1	159	RGN GPX3 ALDOB SLC3A1 ANPEP FTH1 PCK1 G6PC ACADM FBP1 ACY1 CHCHD10 GGT1 AKR7A3 UQCR10 PEBP1 ACY3 UBB OXCT1 CRYAB AKR1A1 ITM2B SLC25A5 HAGH CNDP2 HBA2 CDO1 SOD1 PECR PDZK1 COX8A SLC25A3 TSC22D3 CAT ACSS2 SKP1 PXMP4 COX7A2 COX4I1 OGDH MEP1A ACSM2A SLC22A2 UBC BHMT2 SDHC NDUFB1 KCNJ16 CISD1 MSRB1 NDUFB9 SULT1B1 KHK PGPEP1 B2M SLC25A4 SLC12A1 INMT RPLP1 APOM NDUFA1 NDUFA4 EPHX2 PDHB FABP3 ATP6V0C PPP…	0
drug:P4482:biotin|phosphoprotein phosphatase inhibitor-dn	16984	393	316	40	CTSB MIOX ASS1 CDH16 IGFBP7 FAM111A DDAH1 ENO1 LRP2 CCDC6 PAH COL3A1 AMACR OPLAH HEXB SLC22A6 SPARC DAO PROM1 HSPA5 HSPD1 KMO CLTC NIT2 NCBP1 CRYM SLC34A3 FCER1G GPI PTCD3 CXCL16 COL1A2 DAB2 COL4A1 IFITM1 FMO1 GNPDA1 RDH16 TNFRSF11B FN1	1	173	ALDOB GPX3 FBP1 FTH1 INMT RETSAT RGN MGST3 SPINK1 ACTB PCK1 CHCHD10 OXCT1 UBB SLC25A3 PDZK1 AKR1A1 PECR ACOX1 CNDP2 FABP3 SLC3A1 SLC25A5 ACSM2A UQCR10 DCXR BHMT2 NDUFV2 COX4I1 HAGH FAM151A AGXT2 TCN2 ITM2B COX8A COX7A2 MSRB1 ATP6V0C ACADL NDUFB1 NAT8B RPLP1 ACO2 CD63 NDUFB9 B2M ACADM TST COX5B AASS CHCHD2 GGT1 PEPD CD81 SUCLG1 ANPEP COX6A1 SOD1 SUCLG2 GSTO1 NDUFB11 NAT8 NDUFA1 IDH3G RPS29 DECR1 A…	0
drug:P4483:biotin|phosphoprotein phosphatase inhibitor-dn	16984	347	280	40	CTSB MIOX ASS1 AMACR COL3A1 CRYM HEXB FAM111A ENO1 SPARC IGFBP7 RPL22L1 DAO KMO HSP90AB1 LRP2 LAMP2 OPLAH PROM1 HSPD1 GPI DDAH1 COL1A2 PAH CXCL16 CDH16 PTCD3 COL4A1 FCER1G GNPDA1 NIT2 CLTC RARRES1 FN1 LYPLA1 IFITM1 CCDC6 SLC39A8 SLC34A3 SEC61G	1	153	ALDOB SPINK1 INMT MGST3 OXCT1 APOM HPD FBP1 ACY3 UQCR10 TST RGN COX6A1 ACSM2A COX7A2 ACO2 HBA2 PDZK1 NAT8B OAT TCN2 FABP3 GPX3 NDRG1 HBB NDUFA1 DCXR ANPEP IDH3G MEP1A SUCLG2 ACOX1 RETSAT NAT8 PECR PGPEP1 NDUFB2 EPHX2 AKR1A1 SUCLG1 ACMSD CHCHD10 BPHL FUCA1 CD81 SLC25A3 NDUFB1 CHCHD2 PEPD KCNJ16 ACO1 COX5B ERRFI1 SLC25A5 PRDX5 FAM151A MEP1B ACADL TMIGD1 HAGH SLC22A18 NDUFB9 PIGR PEBP1 ATP6V0C CISD1…	0
drug:P4480:biotin|cyclosporin A|phosphoprotein phosphatase inhibitor-dn	16984	359	286	39	CALB1 ASS1 IGFBP7 DAO LACTB2 SLC22A12 LRP2 AMACR GGH SLC22A6 LYPLA1 FAM111A DDAH1 AHCY PAH CDH16 FMO1 NIT2 CRYM SLC25A30 AQP2 RARRES1 OPLAH SLC39A8 SPTAN1 SPARC SLC15A2 RPL22L1 RDH16 MTHFD1 MCCC2 CTSB ATP6V1A MIF ENO1 PROM1 ATP6V0A4 HSP90AA1 DHCR7	1	157	RGN ANPEP GPX3 ALDOB DNASE1 SLC3A1 AGXT2 PCK1 GGT1 GSTA5 ACADM ACY3 DHRS7 SLC22A2 OXCT1 CNDP2 PGPEP1 RETSAT AKR1A1 ARHGAP24 HAGH APOM CRYAB SPINK1 COX7A2 CAT CHCHD10 ACOX1 COX8A FBP1 INMT BHMT2 CHCHD2 PDZK1 NDUFB9 ATP6V0C ACSS2 GBA3 CISD1 MEP1A FABP3 AKR7A2 CTH FTH1 SKP1 PEPD SLC16A7 AKR7A3 UBC SOD1 SLC12A1 COX6A1 AASS NDUFA1 MSRB1 SLC25A5 DCXR ACO1 CDO1 OSGIN1 PEBP1 PECR ITM2B PGRMC1 HADHB ABHD1…	0
drug:P4481:biotin|phosphoprotein phosphatase inhibitor-dn	16984	308	238	34	CALB1 IGFBP7 ENO1 LRP2 SLC22A6 COL3A1 ASS1 OPLAH MIOX SLC22A12 SPARC FAM111A CRYM SLC39A8 RARRES1 AMACR LACTB2 LYPLA1 DAO RDH16 PROM1 SLC25A30 AHCY DDAH1 NCBP1 DIO1 KRT7 COL1A2 SPTAN1 CDH16 WDFY1 COL1A1 CHORDC1 CCND1	1	140	GPX3 ALDOB FTH1 ANPEP RGN PCK1 PECR GSTA5 CHCHD10 ACY3 FAM151A FBP1 PEBP1 AKR7A3 INMT PGPEP1 SPINK1 B2M SLC3A1 HAGH NDUFB1 DNASE1 UBB TSC22D3 SLC25A5 OXCT1 NDUFB4 BHMT2 COX8A PDZK1 NDUFA1 FABP3 COX7A2 NDUFB9 RPLP1 SLC25A25 SLC26A1 CNDP2 ACO2 CST3 GGT1 UQCR10 RNASEK MSRB1 UBC AASS ATP6V0C AKR1A1 SLC22A2 SLC25A3 SGK1 ACADM DCXR CRYAB APOM RCAN1 P4HB RETSAT SLC12A1 CAT NDUFV2 COX6A1 ME1 ITM2B ACTB U…	0
drug:P4488:biotin|phosphoprotein phosphatase inhibitor-dn	16984	372	301	43	ENO1 CTSB AMACR CRYM LACTB2 COL3A1 IGFBP7 SLC22A6 ASS1 DAO MIOX HSPD1 SPARC SLC22A12 HEXB PREP OPLAH KMO GGH RPL22L1 FAM111A GPI DDAH1 DHCR7 COL4A1 CDH16 LRP2 SLC39A8 COL1A2 RDH16 CCDC6 RARRES1 PROM1 AHCY MCCC2 LYPLA1 NIT2 CXCL16 HSP90AB1 TNFRSF11B CLTC OSBPL8 GNPDA1	1	165	RGN ACY3 AKR7A3 ALDH1A1 ANPEP OXCT1 MGST3 COX6A1 ALDOB FAM151A NAT8 PDZK1 COX7A2 GRHPR SPINK1 ACO2 HSD17B4 NAT8B FBP1 UQCR10 AKR1A1 TST PECR APOM CHCHD10 FABP3 ACOX1 BHMT2 PEBP1 CAT CHCHD2 HAGH UQCR11 COX8A DCXR CNDP2 COX5B NDUFB9 UBC ACSM2A ACTB HGD SDHC TCN2 MSRB1 ECI2 TMLHE AKR7A2 SUCLG1 ME1 GGT1 MPST SUCLG2 KHK ATP6V0C NDUFB2 HAAO GPX3 COX4I1 SLC22A18 LRPAP1 MEP1B ACY1 B2M NDUFS1 SLC25A4 NDUF…	0
drug:P4489:nitric oxide|propan-2-ol|apocynin|angiotensin|losartan|phenobarbital-dn	16984	360	298	58	ELN COL1A1 COL1A2 PLA2G2A C4B TUBA1C GRN TGFB3 CXCL1 APOE SPARC LOXL1 YWHAB ITGB4 POMP COL15A1 HSD3B7 GNS PLCG1 HNRNPU PTTG1 LUM SERPINH1 HGS ATP2A2 NOTCH3 CR1L PLK1 DPP3 SPP1 GABRR1 KCTD13 CPD ITPR3 PSMD11 NRP1 IGF1 TP53 CPZ NRAS GRINA DNM1 MIF SLC6A6 AGT SET AEBP1 CTSB GJA3 CTSK IER5 FZD2 ICAM1 KCNC3 ADCY3 LBP PDAP1 ACRV1	0.999984	148	RPS29 MT1A RPL31 MYL9 HBA2 HBB UBC FTH1 MT2A CPE UBA52 CLU MAP1LC3A CFD RPS11 UBB ZFP36L1 B2M RPLP2 FAU DCN RPL10A RPS14 TSC22D1 AHNAK RBPMS SNCG RPL36 COX8A TPT1 SPARCL1 GDA NDUFB4 DYNLRB1 ITGA1 RPL10 ITM2B IGFBP6 RPS8 LGALS3 COX4I1 EGR1 KLF9 UQCR11 COL4A5 CST3 RPL27A RPS15 NR4A1 CRYAB SULT1A1 FABP4 RPL18A KANK2 RPL29 FXYD1 XDH CDO1 GNG11 FLNC TSPO PGM5 KLF4 RPL15 BTG2 PPP1CA CALM1 NDUFB2 ALDH1A…	0
drug:P2413:mifepristone|lipopolysaccharide|glucocorticoid|dimethyl sulfoxide|antagonist|Van der Woude syndrome|Neuraxis-dn	16984	415	333	52	CLSTN1 NSF APOE SPNS2 CHST1 LAMP5 DNM1 CPNE1 TUBA1A RAB15 TRIM32 VSNL1 SEZ6L2 SPARC MIF GJB6 ARL6IP1 ATXN7L3 DIO2 IFITM3 INO80 SLC6A1 TUBA1B THY1 DIP2B ACTR2 SLC25A22 ATP6V1C1 CPLX1 MOBP CDH11 SLC1A3 AZIN1 COPA RANBP1 CTSC SERPINE2 NAA38 GNPDA1 PPME1 SQLE GRINA C1QBP CTNNB1 SULF2 ASAH1 KCNAB2 ARFGAP1 EEF1E1 COL4A1 ATP6AP1 YWHAB	1	162	PTGDS SGK1 FKBP5 NDUFA3 SNX17 RPL31 RPS29 COX6A1 RPLP2 RPS14 RPLP1 TSPYL4 KXD1 COX4I1 RPS23 ADIPOR2 DBNDD2 SLC25A3 NDUFA1 HPCA ARC COX7A2 UQCRC1 ID4 ATP1B2 CST3 RHOB COX6B1 RAB3A RPL10A ARPC2 TUBA1A CLU TSPAN7 FAU RPL23A BNIP3 RPL26 MAP1LC3A GNG3 RPS15 TSC22D3 ID1 MAT2B NDUFA4 RPS27A NPY PEBP1 RPL10 EIF1B B2M HAX1 RPL13 NDUFV3 SYP RCAN2 ERRFI1 SLC22A17 NR4A1 RABAC1 CITED2 VAMP2 MT3 GOT1 RHOU RND2…	0
drug:P2411:mifepristone|lipopolysaccharide|glucocorticoid|antagonist|Van der Woude syndrome|Neuraxis-dn	16984	376	305	48	APOE GJB6 PSMA4 TRIM32 VSNL1 NSF SPNS2 SPARC ZIC1 SEZ6L2 INO80 CHST1 ARL6IP1 LRRC58 RAB15 NAA38 CDH11 CPNE1 SLC6A1 THY1 MIF ATP6V1C1 DIO2 SYT13 SLC1A3 ATP6V1A MOBP LAMP5 NLK CTNNB1 CHORDC1 C1QBP HEXB DIP2B ACTR2 SULF2 RCN2 GRINA AZIN1 NRARP TSPAN14 RPL7 TUBA1B RALBP1 EEF1E1 ATP6AP2 PSMA7 AGT	1	152	PTGDS SGK1 COX4I1 SLC25A3 TSPYL4 TTR RPS14 ARC NDUFA1 NDUFA3 RPL31 SNX17 CHCHD2 FKBP5 NR4A1 ADIPOR2 ID4 DBNDD2 ARPC2 PRNP NDFIP1 COX6A1 GLUL COX6B1 RPS29 RPL3 GOT1 PRKCD EEF1A1 KXD1 COX7A2 RPLP2 FTH1 RPL10A RPL10 CST3 NNAT TSC22D3 UCHL1 SERINC1 GSTM5 UQCRC1 NEFL RPL26 ATP6V1D ATP6V0C NDUFV3 RPL23A LY6H SCG2 RPS23 NDUFS3 RPS11 NACA RHOU HAX1 NDRG2 COX5A GABARAPL1 RPS5 RPS15 MAL RAB3A RPS27A HINT1 …	0
drug:P758:psychotropic drug-dn	16984	334	278	31	SLC1A3 OPALIN IGF2 ENO1 ZIC1 MIF IFITM3 IDO1 CRYM RPN2 SPTBN2 ACLY SOD2 CNP SPARC PNMA2 FKBP1A STK32C PRR7 PGM2 FARSB TMEM158 ECEL1 PPP1R1B ASS1 EGR4 S100A5 MRPL42 HSP90AB1 FCHO1 MRPL17	1	150	TTR EGR1 CST3 RPL9 PDE1B PTGDS ITPR1 CD81 NDN UBB SGK1 NDUFA4 TSPAN7 COX6B1 PRKACB RPL10A RPL36AL UQCRH COX5A ACTB TCEAL5 RPL3 MYL6 GABARAP MT3 VPS28 RPS6 RPS11 NDUFA7 PFDN5 RPS9 ATP6V1D NDUFA2 NDUFA11 C2CD2L RPLP1 NAP1L5 WFS1 SPCS1 NDUFS8 PPP1R1A AKR1A1 UQCR10 EIF4H AP2M1 ZCCHC12 CTNNA1 RESP18 S100A1 TIMM8B COX14 NDUFC1 WASF1 PRMT2 SLC25A5 MRPL53 VAT1L FEZ1 RPS8 SLC35B1 UBE2L3 ALDH2 GNPTG UBL5 C…	0
drug:P757:psychotropic drug|imipramine-dn	16984	342	275	36	FKBP1A AKAP5 MIF ENO1 SFXN1 FBXO41 PPP1R1B PPME1 PPP1R9B SERPINE2 IDO1 MRPS17 TMEM158 SNRPF SBK1 FOXG1 GDPD5 INTS1 RPN2 GSK3B PSMC1 S100A5 FAM102B TMEM68 ZIC1 BRMS1 CNP COPB2 SOD2 NOC2L SNRNP200 SEC61G RNF6 SLC1A3 RIN1 FKBP4	1	149	TTR UBB NDN RASD2 RPL18A COX4I1 PDE1B SST KLF9 ACTB RPL9 NDUFA4 MFN2 PRNP WASF1 NDUFA7 C2CD2L EIF4H RPL3 RPL10A RPL36AL NDUFS8 EIF3F TMBIM6 CRIP2 AKR1A1 SPOCK3 PTGDS RPS15 CHCHD10 MYL6 ITPR1 UQCR10 TOMM7 PPP1R1A DBP CD81 RPL34 DYNLL1 GAP43 HIGD2A RPL27 RPL32 WFS1 RGS9 SLC35B1 LDB1 FKBP8 SRP14 SPOP UBXN1 HPCA CST3 VAT1L UQCRH HINT2 RPS6 COX6A1 RPS25 MRPS18C CLIC6 JMJD6 TRAPPC2L SNPH P4HB PARK7 RPL…	0
drug:P1877:exendin-4|carbohydrate-up	16984	306	235	30	AHCY IVNS1ABP GLS2 EIF3A KRT18 NPM1 LBH ARL5B SRSF6 CCT2 QTRT1 TCP1 GGH GRB7 HSP90AB1 RABGGTB HK2 LMTK2 ADK IFI30 CCT5 ATF6 GRN HNRNPF DDI2 FGF21 HNRNPA1 GRAMD1A RNF8 ITIH2	1	126	NUPR1 RNASE4 HERPUD1 PTF1A DUSP26 ANG GLUL GNMT PDK4 EIF4A2 GGT1 PNLIPRP2 BHLHA15 GABARAPL1 ETFA KLF15 PDCD4 SRSF5 ETFB SYCN IFI27 CYP39A1 ARHGEF26 PINK1 RPL4 REG3A COX7A2L TXNIP LIFR UBXN1 FAU RPL36AL VAMP8 ACADVL RPS23 RPL36 EIF3G RPL10A RPL18A COPE MARC2 ECI2 RPLP2 YPEL5 USP2 EEF1A1 GABARAP EIF3F VDAC2 RPL27 ZBTB16 RPL23A EIF4B GAMT ARL3 EIF3K RPS8 XBP1 PEX11A NDUFV1 NDUFB10 HADHA CHCHD10 EDF1…	0
drug:P1872:histone|N-methyl-D-aspartic acid|nevirapine-up	16984	538	468	77	PGBD5 CDK5R1 SLC6A1 GALNT14 APOE NSF UNC5A SLC1A3 FABP7 TMEM145 RASGEF1A KCND2 MAL2 VSNL1 NETO1 EGR4 DZANK1 APBA2 CRYM CNNM1 GDAP1 ADRA2C BRSK2 RXFP3 CALB1 PPP2R2C GRM1 RNF182 NTM CPNE7 HCN3 SRCIN1 PCDH17 KCNJ10 ICAM5 AKAP5 NKD2 GAD1 PPP3R1 KCNT1 MEGF11 FRMD5 CYP26A1 HTR2C CASKIN1 RAB15 FJX1 SPNS2 ANKRD34B ARHGEF7 TUBA1A NTSR1 ENC1 CREG2 MAPK8IP2 SCN8A DOC2A HOPX CLSTN3 CALCA PPFIA3 CPLX1 NXPH1 L…	1	217	SPARCL1 GPM6B ZCCHC18 WSCD2 SNAP25 KIF5C CELF3 KCNA1 STMN4 VSTM2A CNTN1 SNAP91 CHL1 NRXN1 CELF4 EPHA4 UCHL1 PRDM8 RTN1 CCK KIF5A LRRC4 SCG3 LMO3 KLC1 B3GALT5 SERPINI1 S100B WDR17 PDE4DIP DGKG NAP1L5 GRP LMO1 MAGEH1 LNX1 WSCD1 SCG5 AMPH MPPED1 OLFM1 AQP4 SLC4A10 SCN2B DLGAP2 MAP7D2 CIDEA NRSN1 RPRM HPCA MMD2 KDM8 MLLT11 NTRK3 RAB6B TSPAN7 PPP4R4 NUDT11 DYNC1I1 SLC35F1 CAMK2B FAM131A LINGO2 MGLL DC…	0
drug:P2062:pyrrolidine-dn	16984	334	278	35	MIOX SPP1 ASS1 CTSB DIO1 DAO AMACR IGFBP1 APOE PAH IVNS1ABP NIT2 CXCL1 SDS SLC5A3 SLC22A6 MTHFD1 PGK1 HSPA9 FMO1 OPLAH NCBP1 AHCY KMO IGFBP3 CHDH PSMC4 PTCD3 LAD1 ADK HRG MIF FETUB PSPH CLTC	1	156	DNASE1 GPX3 OAT PCK1 SPINK1 SLC3A1 COX6A1 ALDOB B2M HPD MDH1 ATP6V0C SULT1C2 ACY3 CYB5A COX7B TEX264 PEBP1 GSTO1 FBP1 GPX4 UBB CISD1 COX4I1 PRDX5 CSRP2 GRHPR NDUFA1 UQCRC1 TXNIP FTH1 DBI AK4 SDHC GOT1 BNIP3 CAT NDUFS5 NFKBIA GABARAP OSGIN1 G6PC ECHS1 NIT1 ABHD14B NDUFB9 NDRG1 HGD ATP6V0E1 SGK1 GHITM CST3 NDUFA5 TMEM50B OGDH CLU SOD1 ACOX1 APOM SLC26A4 HERPUD1 PYROXD2 ERRFI1 HAGH NDUFA6 IAH1 TST C…	0
drug:P2061:pyrrolidine-up	16984	428	380	58	MIOX ASS1 SLC34A3 AMACR PAH DAB2 CTSB DAO HSPD1 GPI TUBA1B NIT2 IGFBP7 OPLAH PMEPA1 SLC22A6 SERPINF2 KMO DIO1 GJB2 LUC7L3 PSPH IGF2R SLC22A1 DDAH1 PLAU FN1 IGF2 TRPV4 CLN6 COL4A1 LACTB NREP TRAM1 IRF3 FMO1 PPP4R2 BAMBI CAMSAP2 APLNR CHDH RABGGTB ACTR2 VHL POLR1C C1QBP TSEN15 HNRNPA2B1 GPX8 LYPLA1 LAMP2 DTX2 CLDN2 F2 IFI30 MED17 LGALS2 JAG1	1	187	GPX3 G6PC FTH1 FBP1 MT1A HPD ACY3 SOD3 RPL6 SLC3A1 SLC7A7 AKR1A1 PCK1 ACSM1 TMEM140 MEP1A ALDOB FAM151A NDRG1 DHRS4 ANPEP UQCRH AGXT2 RPS25 APOM RPS14 GSTA2 GRHPR PYROXD2 HMGCL TST COX7B NDUFV2 SLC37A4 CRYL1 HPGD SLC2A2 HGD THNSL2 SOD1 SLC7A9 CISD1 HBA1 NDUFB9 TEX264 ALDH1A1 SDHC UQCRB RPL23A FABP3 RPL10 RPL26 ABCG2 GLYAT ACY1 TNFAIP8 AK4 ATP6V1G1 AMN HADH OCIAD1 EPB41L3 IGSF11 DPP4 RPL35A PEPD C…	0
drug:P5779:dimethyl sulfoxide|clofibrate-up	16984	363	297	30	F2 SHMT2 MARC1 MIOX CHUK LAMP2 LACTB2 ASGR1 AGT ENO1 HSPD1 ADK SLC25A13 MOSPD1 BCAP31 TGM2 FER1L5 BAAT PSMA1 PYGL MOSPD2 SRD5A1 ABCB11 RBP4 OPLAH SERPINE2 IGF1 CYP17A1 GJB2 PSMG1	1	183	EHHADH FABP1 ACOX1 ECI2 RETSAT HACL1 PCTP ABCD3 HADHB ACADM ADTRP DECR1 HSD17B4 EPHX2 ALDH1A1 ACOT2 HSDL2 CHCHD2 NUDT7 CIDEA ACADL FBP1 CAT OAT AGMO SLC25A20 PHYH VNN1 ETFB TXNIP DBI MTTP GPD1 CREB3L3 CHPT1 CD36 CMBL GSTA4 GSTA5 ACADVL TMEM14C ALDH3A2 CPT2 ACAT1 CRAT HSD17B6 AQP7 PDK4 UQCRB GLRX5 SAR1B PODN ETFDH COX7A2 UQCR10 CHCHD10 MOCS2 SLC22A18 ACO2 STARD10 MGST3 PPCS PEX11A NDUFC1 LPCAT3 HI…	0
drug:P5778:dimethyl sulfoxide|clofibrate-up	16984	310	255	28	F2 SHMT2 RBP4 VMP1 ASGR1 MIOX SERPINE1 HSPD1 FER1L5 IGF1 PSMA1 CHUK LAMP2 PYGL ABCB11 BCAP31 LACTB2 MIF MARC1 BAAT SERPINE2 CUL4A AGT DHCR7 SLC25A13 OPLAH POMP GJB2	1	156	ACOX1 FABP1 ALDH1A1 EHHADH DECR1 RETSAT HADHB ABCD3 HACL1 HSD17B4 ADTRP PHYH CHPT1 FBP1 EPHX2 ACADL CHCHD2 ECI2 DBI PCTP ACADM CAT GSTA5 CMBL TMEM14C CREB3L3 CIDEA EPHX1 ALDH3A2 SLC25A20 HSDL2 HMOX1 CHCHD10 VNN1 P4HB PODN ETFDH MTTP GSTA4 AGMO GPD1 ETFB ACADVL COX7A2 MGST3 ACSM1 RARRES2 NUDT7 SULT1B1 HIBCH UQCRB CD36 AKR7A3 ACO2 SUCLG2 MOCS2 GSTA3 SLC22A18 SAR1B ETFA CPT2 BHMT PIGR NDUFC1 GLRX ST…	0
drug:P5772:dimethyl sulfoxide|clofibrate-up	16984	340	276	28	SHMT2 PSMA1 ENO1 LAMP2 LACTB2 ASGR1 PYGL MIOX HSPD1 GJB2 ABCB11 IGF1 CHUK PSMB2 GLRX3 F2 C4BPA BAAT VMP1 MOSPD2 MARC1 SLC22A1 TGIF1 HP TGM2 SNRPG POMP UBD	1	164	ACOX1 HADHB PCTP HSD17B4 ADTRP HACL1 FBP1 ABCD3 FABP1 ALDH1A1 ECI2 DECR1 CHCHD10 EPHX2 SLC25A20 PHYH CAT EHHADH ACADL CREB3L3 HSDL2 CHPT1 RETSAT ALDH3A2 CMBL TMEM14C ETFB GPD1 MOCS2 STARD10 MTTP CHCHD2 ACADM ETFDH ACADVL NUDT7 CIDEA GDE1 MGST3 HMOX1 LIPA SAR1B SULT1B1 FAU PODN CISD1 GLRX5 ACO2 DBI UQCRB EPHX1 GLRX AGMO NDUFC1 PECR CPT2 ACOT2 VNN1 PEX11A PPCS HIBCH CISD3 ACAT1 PLIN2 COX7A2 HSD17B6…	0
drug:P5771:dimethyl sulfoxide|diisononyl phthalate-up	16984	448	355	24	F2 SHMT2 LAMP2 APOA2 ENO1 MIF RBP4 AGT SERPINE1 ASGR1 POMP BCAP31 MARC1 PSMA1 LACTB2 APOH CTSB HP GJB2 MIOX SLC25A13 APOC1 ADK FER1L5	1	228	ACOX1 DBI DECR1 ALDH1A1 FABP1 CHCHD10 EPHX1 ADTRP FBP1 HACL1 GSTA5 CHPT1 EPHX2 HADHB ABCD3 PHYH RETSAT CMBL CREB3L3 CAT PCTP ECI2 CIDEA COX7B BHMT HSD17B4 STARD10 MGST3 HMOX1 COX7A2 RARRES2 TMEM14C GSTA4 HSD17B11 UQCRB EHHADH ETFB GDE1 ACSM1 NDUFC1 HSDL2 RPL26 IFI27 UQCR10 CHCHD2 SLC22A18 F10 RPS29 SLC25A20 NDUFA4 AGMO GLRX5 NDUFB9 SAR1B GPD1 NDUFB11 PODN ACADM UQCRQ ACO2 GPT B2M UQCRH NUDT7 BHMT…	0
drug:P5777:dimethyl sulfoxide|clofibrate-up	16984	329	269	41	APOC1 APOA2 AGT MOSPD2 F2 CHUK ENO1 ABCB11 TGM2 SHMT2 PSMA1 CYP1A2 GJB2 SLC16A6 LACTB2 FGL1 PLG ASGR1 MARC1 SERPINE1 G6PD CTSB PSMB2 FER1L5 SRD5A1 BST2 MOSPD1 LIPC LAMP2 TXNDC12 CHORDC1 SRP9 GLRX3 PYGL CLDN1 MIOX ITIH2 IFITM3 BCAP31 VEGFA NAA50	1	146	EHHADH ACOX1 PCTP ECI2 FABP1 TXNIP HACL1 ABCD3 HADHB ADTRP HSDL2 HSD17B4 NUDT7 PDK4 RETSAT GPD1 ACOT2 MTTP DBI CHCHD2 EPHX2 SLC25A20 DECR1 FBP1 ACADM CREB3L3 PHYH ACAT1 LIPA GLRX5 MOCS2 PEX11A SAR1B ACO2 ACADVL CPT2 ETFB HSD17B6 CAT CIDEA PPCS ACADL CISD3 BNIP3 LPCAT3 GDE1 CRAT TMEM14C EEF1B2 ALDH1A1 ACOT12 AGMO CISD1 GADD45A CMBL AASS SERP1 ACO1 C8G PNPLA2 HIBCH CHCHD10 ETFDH ANPEP STARD10 NDUFA…	0
drug:P5776:dimethyl sulfoxide|clofibrate-up	16984	352	280	42	APOC1 APOA2 AGT PLG FGL1 CYP1A2 F2 FETUB SHMT2 ENO1 BST2 CTSB IFITM3 ITIH2 PSMA1 ASGR1 LIPC SERPINE1 RPN2 SERPINA6 FER1L5 PSMB2 PYGL TFRC C9 POMP C4BPA SSR1 CHUK SRD5A1 HAMP G6PD LAMP2 SEC61G IGF1 ABCB11 SRP9 SLC39A1 SLC16A6 FABP7 AASDHPPT BCAP31	1	150	ACOX1 FGA PCTP DBI PHYH HACL1 CHCHD2 HADHB FABP1 C8G HSD17B4 ABCD3 ECI2 FBP1 ADTRP SLC25A20 EHHADH HMOX1 EPHX2 MTTP ETFB HSDL2 MOCS2 EEF1B2 FAU HSD17B6 CREB3L3 ACADVL CISD3 IFI27 TMEM14C SPINK1 SLC22A18 COX7A2 PPCS LIPA GPT SERPINC1 NDUFA4 AASS RETSAT DECR1 NDUFC1 UQCR10 GSTK1 GLRX5 SAR1B CISD1 CMBL GPD1 ACO2 STARD10 CHPT1 NUDT7 CPT2 P4HB ACADM SERP1 APOM ETFDH RPL13A ANPEP UQCRB ACAT1 NDUFS7 NDU…	0
drug:P5774:dimethyl sulfoxide|clofibrate-up	16984	312	263	27	UBD S100A11 DHCR7 HSPD1 VMP1 CRP BBOX1 RBP4 BAAT MIOX LACTB2 MIF NIT2 SHMT2 ACLY SERPINE2 MARC1 SLC25A13 CREG1 GJB2 LAMP2 MAT1A IGF1 PSAT1 F2 MOSPD1 BRCC3	1	160	ACOX1 ALDH1A1 DECR1 FABP1 ACADL EHHADH ADTRP RETSAT SLC25A4 GSTA5 EPHX1 HSD17B4 HADHB CHCHD10 ABCD3 CAT FBP1 SULT1B1 AKR7A3 CHPT1 ALDH3A2 HACL1 CIDEA EPHX2 ECI2 MGST3 ACADM CD36 SELENBP1 VNN1 GSTA3 PECR PODN GSTA4 CMBL CREB3L3 TMEM14C HSDL2 ETFDH GLRX SLC25A20 ACSM1 HSD17B11 GDE1 BPHL AGMO GPD1 RARRES2 PHYH HIGD1A NUDT7 STARD10 HIBCH UQCRB CYB5A PCTP PIGR PXMP2 SUCLG2 MYL12A ETFB RNF103 HMOX1 ACA…	0
drug:P2657:4,4'-diaminodiphenylmethane|inhibitor|(2Z,3Z)-bis\{amino[(2-aminophenyl)sulfanyl]methylidene\}butanedinitrile-up	16984	294	274	41	ALPP PNMA2 OPN3 FBN1 NTM IFI16 NKX2-1 GPNMB MEGF6 DAB2 LMCD1 BDNF GABRE CFHR1 ASS1 AMIGO2 SCD DPYSL2 IGFBP7 G6PD GPRC5A SLC38A4 TNFSF9 HEY1 IFITM3 PSAT1 FZD2 CUL4B SLC5A3 ISG15 DRAM1 TSGA10 TNS3 GRN FADS2 ABCA7 CD55 ZNF264 SH3BP4 POLM SPARC	1	141	CYP1A1 AKR1C3 AKR1C2 LARP6 RNASE4 SOCS2 LIMCH1 PLAC8 RGL1 NR3C1 ABCA8 EDIL3 TXNIP ABCG2 PDE9A SECTM1 PMP22 CTSO SLC25A1 PINK1 OLFML2A SLC22A18 ACYP2 LSS FHL1 CA11 PPP1R3C MVP CTH SELENBP1 SULT1C2 GNAI1 AMT ABHD4 TGFB1I1 ID4 PNRC1 SYNC VIPR1 SLC25A23 NDRG4 DDX60 RABAC1 RAB4B RCAN2 GSTM4 CYP39A1 F8 GABARAPL1 ACSL1 DENND3 TES TGFBR3 TMEM140 RPS6KA2 TIPARP LRRC23 AHNAK2 ALDH2 CLIP4 FUCA1 DHRS1 MXI1 C…	0
drug:P2475:4,4'-diaminodiphenylmethane|dimethyl sulfoxide|inhibitor|(2Z,3Z)-bis\{amino[(2-aminophenyl)sulfanyl]methylidene\}butanedinitrile-up	16984	319	298	45	ALPP OPN3 NKX2-1 FBN1 PNMA2 SLC38A4 CDH11 GABRE CFHR1 GPNMB MEGF6 LMCD1 NTM SCD TRIB2 SLC5A3 PHTF1 WNT5A FADS2 DPYSL2 G6PD ISG15 ABCA7 SPARC DAB2 DHCR7 NRP1 POLM ZNF264 IFITM3 ARID5B SREBF1 APOC1 GNE LIPG NREP TNS3 LPCAT1 FASTKD1 FZD2 ASS1 PLXNA3 CD55 EFNA1 KIAA0355	1	151	CYP1A1 AKR1C3 AKR1C2 LARP6 ID4 RNASE4 RGL1 ABCG2 EDIL3 ID1 MVP ID3 LSS ABCA8 SELENBP1 LMO3 NR3C1 SLC25A1 SECTM1 SMARCD3 LIMCH1 SULT1C2 SLC22A18 OLFML2A AHNAK2 CA11 GNAI1 PINK1 SYNC ACYP2 PDE9A NDRG4 RABAC1 CTSO DENND3 GSTA4 MT1E CYP39A1 SLC25A23 PDGFD AMT GSTM4 PCYOX1 RCAN2 DDX60 PNRC1 ARMCX1 ACSL1 VIPR1 FHL1 HCFC1R1 ABHD4 RAB4B ST3GAL5 TGFBR3 PPP1R3C PMP22 TMEM140 MALL TGFB1I1 HPGD INSIG1 LRRC23…	0
drug:P5768:dimethyl sulfoxide|diisononyl phthalate-up	16984	345	276	37	APOC1 APOA2 AGT FGL1 LAMP2 CTSB SHMT2 C3 CYP1A2 ENO1 F2 IFITM3 ABCB11 RPN2 CHUK PLG BST2 ASGR1 ITIH2 POMP LIPC MOSPD2 SERPINE1 IGF1 BCAP31 SRP9 PGK1 ISG15 C9 TFRC SERPINA6 FER1L5 SSR1 LACTB2 PYGL TTPA SRD5A1	1	150	ACOX1 DBI PCTP HACL1 ABCD3 PHYH HSD17B4 HADHB ADTRP ECI2 FABP1 CMBL CHCHD2 FGA FBP1 ETFB HSDL2 EPHX2 TXNIP DECR1 SLC25A20 C8G EHHADH GPD1 CREB3L3 SERPINC1 HSD17B6 SAR1B AASS B2M IFI27 GPT SERP1 NUDT7 UQCR10 PPCS NDUFA4 UQCRB MOCS2 TMEM14C PEX11A MTTP CAT RETSAT ACADM LIPA RPL27A GLRX5 ACADVL SLC22A18 AGMO NDUFA5 EEF1B2 SPCS3 SPINK1 SSR4 PLIN2 BHMT CISD1 ETFDH PDK4 CHPT1 ETFA OAT UQCRH PDHB DAD1 N…	0
drug:P2461:4,4'-diaminodiphenylmethane|inhibitor|(2Z,3Z)-bis\{amino[(2-aminophenyl)sulfanyl]methylidene\}butanedinitrile-up	16984	328	305	47	ALPP OPN3 NKX2-1 FBN1 PNMA2 SLC38A4 CDH11 GABRE GPNMB LMCD1 TRIB2 MEGF6 NTM CFHR1 WNT5A SCD FADS2 SLC5A3 PHTF1 G6PD DPYSL2 NRP1 SPARC DHCR7 DAB2 GNE ABCA7 POLM ISG15 ZNF264 ARID5B NREP LPCAT1 FSCN1 SREBF1 PLXNA3 CD55 TNS3 LIPG TSGA10 SRD5A1 EFNA1 FASTKD1 IFITM3 FZD2 HEY1 LRRC37A2	1	152	CYP1A1 AKR1C3 AKR1C2 ID4 LARP6 RNASE4 ABCG2 RGL1 EDIL3 ID1 LSS MVP ID3 ABCA8 SELENBP1 SECTM1 NR3C1 SLC25A1 LIMCH1 SULT1C2 LMO3 SMARCD3 CA11 ACYP2 GNAI1 OLFML2A PDGFD SLC22A18 NDRG4 TGFB1I1 PINK1 CYP39A1 AHNAK2 PDE9A SYNC CTSO RABAC1 DENND3 RCAN2 GSTM4 MT1E SLC25A23 RAB4B PPP1R3C PCYOX1 VIPR1 ACSL1 PMP22 AMT MALL TGFBR3 ABHD4 ST3GAL5 DDX60 PNRC1 GSTA4 HCFC1R1 ARMCX1 FHL1 TMEM140 INSIG1 HPGD GLYR1 …	0
drug:P2040:fluoxetine|sucrose|antidepressant|imipramine|L-proline residue-up	16984	464	424	72	MIF ATP6AP1 LY6E DDN ALG3 CTSB APOE ENO1 MAL2 SLC6A1 GABRA3 GMFB PSMD2 CRYM THY1 STMN1 SLC1A3 MAP2K1 CACNG3 HSPBP1 SPRN HSP90AB1 KCNK9 KCTD13 PERP TUBB3 DUSP7 GM2A PPT1 NUTF2 CD24 ACTR3B M6PR LRRN1 ATP6V1C1 ATP6AP2 FKBP1A CPLX1 GABBR1 NAA38 CD47 BLCAP ANKH LAPTM4B FADS2 GPI VKORC1L1 TCP1 PAFAH1B2 GAD1 PGK1 UBAC2 NALCN SLC6A11 YWHAZ SLC30A3 IL1RAP PSMB2 COPA CTNNB1 ZMIZ2 PIGU KCNG2 RAP1GDS1 CDK2AP…	1	202	PFN1 HPCAL4 DAD1 MTCH1 CD81 UCHL1 RABAC1 GSTM1 SHISA4 SST RND2 RAB1B GNG3 GABARAP FAIM2 NOP10 CSRP1 PEBP1 ITM2C ATP6V0C KCNIP3 TSPYL1 RTN1 GPR37L1 RPS20 NRN1 SYP SDHC HIGD2A TMEM47 SLC25A11 ALDOC COX8A CFL1 MT2A GRIA1 TSPAN7 GLYR1 UQCRB LYNX1 CLTB TRAPPC1 CDIPT RPL35A NPY TMEM50B UBL7 SLC22A17 AP2M1 HPCA GOT1 LGI1 ATP6V0E2 UQCR11 GSTM5 PCSK2 PGRMC1 GLRX SLC48A1 CCDC107 PTPRN VAMP2 GHITM RPL11 SLC…	0
drug:P2042:sucrose|antidepressant|imipramine|L-proline residue|fluoxetine-up	16984	384	356	57	MAL2 MIF SNRPD1 GMFB CTNNB1 SCD ALG3 DUSP7 FKBP1A SPRN PSMD2 CTSB ALYREF FADS2 LY6E BLCAP SLC6A1 RANBP1 NSF KCNK9 KHDRBS1 ATP6AP2 TUBA1B HSPBP1 PSMD1 THY1 DDN CANX SLC2A1 PGM2L1 AGT GDAP1 PSMB2 USP14 RAN RASGEF1A SPTAN1 SOD2 TRAM1 CPLX1 GM2A SEMA6B ATP6AP1 NALCN PRPF19 UNC5A NRAS KCTD13 FAM189B SNX5 M6PR TMEM33 PGK1 CACNG3 CLDN12 PFKP CACYBP	1	174	MT2A SHISA4 PFN1 GSTM1 RPLP2 HPCAL4 UQCRB RPS20 GLRX FAIM2 ATP6V0C GHITM TSPYL1 NRN1 MTCH1 GABARAP CSRP1 NDRG2 MT1A CD81 GNG3 SST UCHL1 TMX4 DBP RND2 EIF4A2 SDHC HIGD2A LYNX1 HPCA NOP10 COX8A RPL11 RAB1B GRIA1 GABARAPL2 GDA GPR37L1 CLTB SYP DAD1 TMEM47 PTPRN RABAC1 ATP1B2 FXYD1 TSPAN7 UBE2D2 PDK2 SLC50A1 MLLT11 CFL1 CCDC107 NDUFA4 CLDND1 LGI1 GLYR1 SLC22A17 MEGF9 SLC48A1 NCALD CYB5R3 AHCYL1 CDO1 …	0
drug:P2785:hormone-up	16984	356	286	47	MIOX ASS1 CDH16 NUDT19 FMO1 SLC22A6 CLDN2 SLC22A1 CYP7B1 SLC22A12 CYB5B DAO NCEH1 SFXN1 MIF ARL6IP1 DDAH1 LAMP2 PAH NOX4 SOD2 GRB7 HSPD1 GLDC SERPINF2 CYP24A1 MFSD1 HSPA9 GM2A PLSCR2 MACROD2 LLGL2 ENO1 GRINA PDIA3 SLC6A6 LRRC8D PROC NXT2 PLAU HOXB7 MOGAT1 IVNS1ABP SAMD9L TMEM33 ATP6V1A SQLE	1	151	PDZK1 ACY3 CYP4B1 ALDOB GLYAT DNASE1 INMT NDRG1 BDH2 AKR1A1 KHK GUCA2B CHPT1 TMBIM6 TMBIM4 COX8A FBP1 G6PC NAT8 COX6A1 ABHD14B OXCT1 SELENBP1 SLC25A5 LRPAP1 GPX3 AMN CDHR5 SOD1 ACADM MEP1A ERRFI1 HERPUD1 NDUFA4 ALDH6A1 COX7C TTC36 HINT2 CRYL1 GSTZ1 ABCD3 PRDX5 SLC12A1 HIGD2A UQCR10 GABARAPL1 CHCHD10 CIDEB COX4I1 BHMT2 GHR NDFIP1 NDUFA1 LDHD METTL7B UQCRH TCN2 NDUFB8 HINT1 S100A1 CSRP2 RETSAT COX6…	0
drug:P2677:metformin-up	16984	346	255	39	HAMP HP SEC61G APOE MIF APOF RBP4 ASS1 ASGR1 MORF4L2 ITIH2 PGM2 PCSK9 IGFBP1 ADK PSAT1 ARL6IP1 HSP90B1 ACLY AHSG FADS2 RPN2 CLDN1 CCT6A HSPA9 HSPD1 MRPL17 AGT COPB2 SERPINF2 DHCR7 SDS RGS16 FCER1G PDIA3 EIF4EBP1 UROC1 CPB2 POMP	1	133	PNLIPRP1 TTR APOA1 UQCR10 RPLP1 APOM UBA52 RPL9 UQCRH RPL36AL FBP1 COX6B1 HERPUD1 CELA2A ACADM CLPS COX4I1 FGA CHCHD10 ALDOB APOC3 SULT1A1 GRHPR HINT1 RPS9 KRTCAP2 TBCA ETFB CYB5A COX6A1 NDUFA4 SPCS1 ATOX1 UQCR11 APOB BHMT SSR4 MSMO1 EGR1 DBI NDUFA12 NDUFA2 RPL27 SSR2 UBL5 RPL10A ATP6V1E1 RPS6 COX5A RPL29 P4HB TMBIM4 RPL26 HIGD2A GSTZ1 POLR2L CST3 STARD10 CBR1 ETFA SEC13 NDUFA6 PSMB6 HMGCL NDUFA7…	0
drug:P5769:dimethyl sulfoxide|diisononyl phthalate-up	16984	368	295	34	APOC1 APOA2 FGL1 AGT LAMP2 ENO1 SHMT2 BST2 F2 CTSB IFITM3 CYP1A2 ASGR1 PLG ITIH2 CHUK TFRC RPN2 POMP MOSPD2 ABCB11 IGF1 SRP9 SERPINE1 TTPA LIPC C3 FER1L5 BRCC3 C9 SEC61G RBM39 SSR1 SERPINA10	1	165	ACOX1 DBI PCTP HACL1 PHYH ABCD3 ADTRP HSD17B4 CMBL IFI27 ECI2 HADHB FBP1 FABP1 DECR1 ETFB HSDL2 EPHX2 COX7B GPD1 CREB3L3 FGA C8G CHCHD2 FAU B2M NDUFA4 GPT TXNIP SERPINC1 UQCRB SLC25A20 SERP1 COX7A2 CHCHD10 HSD17B6 EHHADH PPCS SAR1B TMEM14C SLC22A18 UQCR10 GLRX5 NUDT7 SEC61B AASS RPL27A ACADM PEX11A ACADVL RETSAT NDUFC1 PDHB ETFDH CISD1 RPS13 LIPA UBA52 MOCS2 SPINK1 SSR4 BHMT AGMO BHMT2 PDK4 NDUFB…	0
drug:P3503:ethanol|5-amino-1-(5-phospho-D-ribosyl)imidazole|dopaminium(1+)-up	16984	313	253	30	PPP3CA CNP SYNPR THY1 FAM49B RPL22L1 YWHAZ TMEM88B PPP1R1B CRYM HMGB3 HEXB HTR2C HNRNPK ICAM5 RASGEF1A LRP11 LRRC58 COPG2 IVNS1ABP HNRNPD NALCN SERINC5 LAMP5 PNPO RPGR MED30 MAL2 ATP6AP1 RANBP1	1	134	B2M PLP1 RRAGA DBP PLLP SRSF5 PCP4L1 SCN4B PENK CIRBP FTH1 CSDE1 KXD1 PDLIM2 ITFG1 APLP1 QDPR MAL CALM2 EID1 TCEAL3 WASF1 LY6H EEF1A1 DAZAP2 CD81 PGRMC1 RHOB CCK CMTM5 HPCAL4 EFHD1 FRRS1L ATP6V0E2 RPL4 ITM2A ATP6V1G2 GLTP CLIC4 SLC4A10 AMPH STMN4 RPL23A FAU GAP43 CADM4 ASPA SOWAHA PPP2R2B PKIA CDC42 SCOC NEGR1 ZCCHC18 TPPP PJA2 CACNA2D3 CFL1 NPTN VDAC2 PPP1R14A CAMK2B RPLP2 DSTN AKR1A1 PIGP NDUFS…	0
drug:P3500:ethanol|5-amino-1-(5-phospho-D-ribosyl)imidazole|dopaminium(1+)-dn	16984	355	280	44	PPP1R1B HSP90B1 C4B GRINA IFITM3 HSPA5 HSP90AB1 GJB6 RAB15 DUSP14 HSPH1 DDN PHLDA1 SEC61G GAD1 ICAM5 SEZ6L2 FAM81A FUS LUC7L3 DCLK3 PPP3CA LRRC58 HNRNPM PLA2G7 IDE LMTK2 CTNNB1 ECEL1 TMEM132A ZC3H11A RASGEF1A RASA2 CHORDC1 FAM102B DNAJC7 MAP2K1 PDIA3 RRP1 EIF3B PDIA4 CANX ARGLU1 SH2D5	1	146	EGR1 SGK1 NR4A1 PTGDS WFS1 CKB GLUL RPL31 GSTM1 ALDOC GNG7 MANF NDRG2 FOS NDRG4 FAM107A PENK CHCHD2 CHCHD10 PSD ABHD4 SRSF5 RPL10 DUSP1 ARC FKBP2 SCN4B UQCRH RPL36AL NGEF DNAJB9 GSTM5 B2M GABARAPL1 CELF4 UNC13C WIPF3 CSRP1 SLC25A18 SNX17 IFI27 P4HB PER1 PFKM ALDH6A1 GPR37L1 CACNA2D3 NECAB2 SCG2 ISCA1 TMCC2 ADORA2A ITM2C TIPARP PRRT2 NDUFA5 EPHX1 CAMK2B NPTN TIMM8B NDUFA2 COX5A ATP6V0E2 COX6A1 PIN…	0
drug:P665:-up	16984	407	367	44	TUBA1B PLK2 IRF2BP2 YWHAZ GPNMB MARCKSL1 ENO1 PSAT1 SERPINE2 ATP6AP1 MORF4L2 BDNF DNM1 FOXG1 SLC20A1 YWHAB DNAJA1 GPR19 STMN1 HMGN1 TOMM20 BCAT1 HOMER1 GPI PELI1 HPRT1 CXCL1 NSF SEC61A2 GJB2 HSP90B1 NCL SQLE MEX3B EGR4 HSPH1 STAT3 MAPRE1 ATP6V1C1 HSPD1 GRINA CD24 MIF RBM14	1	185	EGR1 ARC RGS2 FOSB NR4A1 GADD45G NR4A3 PTGDS TIPARP ALDOC ERRFI1 NR4A2 COQ10B SGK1 BTG1 RHOB ARL4D ATF3 JUNB NDRG4 CFL1 ACTB CITED2 BTG2 SLC25A5 RGS4 NEFL CST3 ZFP36L1 RPLP1 IER2 S100B NFIL3 COX4I1 SCG2 RPL11 CKB SLC25A3 CALM1 INSIG1 MRFAP1 CPE SLC25A4 TSPYL4 NRN1 NAP1L5 GLUL ATF4 TSPAN7 ATP6V0C NPTX1 NEUROD1 ID2 NDRG2 NDUFA4 RPS9 RPS20 HPCA RASL11B FTH1 TTR GSTM5 MT3 DSTN MAP1LC3A HMOX1 NELL2 ND…	0
drug:P4272:water|6alpha-methylprednisolone-dn	16984	425	379	57	ALOX15 ASPN SLC19A3 CALCRL TMEM119 GJB6 DAO CLDN1 GPC3 LUM CDC25B AZIN1 TTPA PPP1R1B TLCD1 SLC15A2 FMO1 LFNG C1QTNF5 NMUR2 RTKN2 SLC22A6 TASP1 KCNG4 TOMM20 APLNR TMEM86A CALCA PIGM PROM1 SQLE PCOLCE MRPS17 PSMD14 YRDC MDK PADI2 IGF1 HSD17B7 SRD5A1 CCDC148 ALDH5A1 ADK RBP4 LEMD2 TMEM161A APLN NPRL3 RPL22L1 DHCR7 PKDCC CLNS1A ITGBL1 VHL LEPROTL1 RPE CES5A	1	183	ALAS2 SLC9A2 PI16 HBB CPXM2 SLC26A7 SULT1A1 MFAP4 DPP4 AHSP DUSP1 TSC22D3 MFAP5 SLC16A10 SLC4A1 MYOC PKHD1L1 ZBTB16 HEMGN KLF2 IFI27 DDC NPY SCOC PNLIP AGMO MRPS14 PAQR7 PMP2 TST PLCD4 HIF3A TCEAL1 SELENBP1 FCGRT CBR4 PAMR1 RNASE4 SLC27A6 NR4A1 SLC35G1 ABHD14B RLBP1 DHRS1 DBI UQCR11 RARRES2 FECH CCNDBP1 MCEE ABHD8 AKR1B10 GSTA4 ALDH3A1 SDHD TM7SF2 DUSP19 GDPD2 RABAC1 KLF9 CPQ DPT MVD OAT IGFBP6 P…	0
drug:P2615:4,4'-diaminodiphenylmethane|dimethyl sulfoxide|inhibitor|(2Z,3Z)-bis\{amino[(2-aminophenyl)sulfanyl]methylidene\}butanedinitrile-up	16984	317	296	43	ALPP OPN3 NKX2-1 FBN1 SLC38A4 PNMA2 GPNMB NTM MEGF6 CFHR1 LMCD1 DAB2 SLC5A3 GABRE SCD G6PD WNT5A TGFBI CD55 ABCA7 SREBF1 TNS3 AGTPBP1 PHTF1 ISG15 SPARC AMIGO2 PLXNA3 NEBL ARID5B CUL4B DPYSL2 S100A3 FZD2 NREP TSGA10 ASS1 KIAA0930 FADS2 EFNA1 IFIT3 CD24 GRN	1	152	CYP1A1 AKR1C3 AKR1C2 ID4 ABCG2 RGL1 RNASE4 LIMCH1 MT1E EDIL3 LMO3 LARP6 ABCA8 SELENBP1 GNAI1 NR3C1 ID3 SECTM1 CA11 SULT1C2 MVP ID1 SLC25A1 SLC22A18 ACYP2 OLFML2A SMARCD3 PINK1 PDE9A CYP39A1 LSS CTSO AMT GSTA4 PDGFD VIPR1 NDRG4 SOCS2 RABAC1 GSTM4 SLC25A23 DENND3 SYNC RCAN2 DDX60 PNRC1 HCFC1R1 ABHD4 TGFBR3 TIPARP ACSL1 AHNAK2 TMEM140 PCYOX1 FUCA1 LRRC23 RAB4B GABARAPL1 PPP1R3C HPGD TCEA2 ST3GAL5 FH…	0
drug:P3511:ethanol|5-amino-1-(5-phospho-D-ribosyl)imidazole|dopaminium(1+)-up	16984	397	324	42	PPP3CA C4B CNP DCLK3 DDN PPP1R1B CTNNB1 PLA2G7 PTGES3 ICAM5 LAMP5 FUS COPG2 HEXB ERMN MOBP GRINA TMEM88B IFITM3 SYNPR BCL11B MSL1 RASGEF1A HTR2C CHORDC1 PFDN2 LAMP3 HOPX YWHAZ BLCAP EMG1 PRMT1 DNAJC7 SLC39A10 IFIT3 SHROOM2 SET HSPH1 RNF44 APOE ANLN HNRNPA1	1	170	B2M SRSF5 PLP1 RRAGA EEF1A1 FTH1 PCP4L1 NDRG2 CKB ARL6IP5 HPCA MAL ATP6V0E2 CD81 FAU GABARAPL1 NGEF KXD1 RPS14 PFKM PENK STMN4 SCN4B RPL32 PPP1CA RTN1 CSRP1 CCK UCHL1 UQCRC1 CALM2 CAMK2B TCEAL3 FXYD1 PLLP IFI27 DCTN3 RPL4 ADORA2A RPL26 NDUFC1 PSD TMBIM6 ZCCHC18 ARL2BP RPL23A TRANK1 GOT1 CMTM5 GSTM1 ABHD4 MAP7D1 CLU COX4I1 ISCA1 CLIC4 APPL2 KCNAB1 AAMP GABARAP GLOD4 CAP1 FRRS1L CSDE1 RPL31 MAGEH1 …	0
drug:P3526:ethanol|5-amino-1-(5-phospho-D-ribosyl)imidazole|dopaminium(1+)-dn	16984	258	203	25	TUBA1B TUBA1A STMN1 CCP110 CRYM FABP7 APOE HOPX CDH11 SQLE ZIC1 ITGB8 NIPA1 FAT1 ERMN DEK CCT5 LAPTM4B DNAJA1 C1QBP BCAP31 NLK PCNA TMEM86A KLK6	1	111	CST3 CHCHD10 COX4I1 TUBA1A QDPR PLP1 COX6A1 NDUFA1 OSBPL1A COX5A CCK DBP UQCRB KXD1 NDUFB11 NDUFS5 RPL26 COX6B1 NDUFC1 OXT ASPA DENND5A CKB PLLP HPCA SYTL2 NDUFS3 RTN4 TPPP VDAC2 ITM2A VPS28 SDHB GNG11 NDUFB10 GHITM PSMB6 NDUFS8 IDI1 RHOQ DSTN UQCRC1 RPLP2 COQ7 KCNE2 PVALB NDUFA4 MICALL1 S100B NDUFB5 NDUFB6 VAT1L UQCR11 SPARCL1 CALM2 CMTM5 APPL2 RPLP1 ACADM FEZ1 HCFC1R1 NDUFB7 COX7A2 RAP1A GLTP H…	0
drug:P3536:ethanol|5-amino-1-(5-phospho-D-ribosyl)imidazole|dopaminium(1+)-dn	16984	450	364	56	CNP ERMN MOBP C4B DDN PSAT1 STMN1 PKP4 CRYM TMEM88B CCP110 SEZ6L2 PPP3CA SPTAN1 ANLN LAPTM4B TMEM63A FKBP9 TUBA1A BCAP31 SREBF1 APOE ARL6IP1 HSP90AB1 GAD1 GGH POLR2B STEAP1 KCNJ10 HOPX NTM FAM81A KRT18 CHST1 POMP FIBCD1 PSMD14 PGK1 SLC12A2 MOSPD1 PDPN RAB15 ANKRD34B FOXG1 CHORDC1 NIPA1 LAMP5 LAMP2 CDK19 PHACTR3 BCL11B KLK6 PCNA OTX2 RPL7 S1PR5	1	182	PENK B2M MAL PVALB IFI27 FEZ1 PLP1 QDPR DENND5A PCOLCE2 CKB ASPA SGK1 NDRG4 KXD1 COX6A1 CHCHD10 CMTM5 RPL26 SPARCL1 STMN4 NEFL HIGD2A ALDH1A1 OSBPL1A NDUFV3 ARL6IP5 CST3 SCG3 HPCA CLU NRN1 GSTM5 WIPF3 NDUFB7 FXYD1 SST EEF1A2 NDUFA1 PEBP1 TSPAN2 RPL4 COX4I1 ATP6V0E2 NPY MAP7D1 RPL3 RPS5 RAPGEF2 NDUFB10 SRSF5 SH3GL3 TPPP PPP1CC RHOQ NDUFV1 NEFM GRP WFS1 CSRP1 AKR1A1 TUBA1A PRICKLE2 VAMP8 S100B RPL1…	0
drug:P3549:ethanol|5-amino-1-(5-phospho-D-ribosyl)imidazole|dopaminium(1+)-up	16984	278	212	25	GJB6 PHACTR3 C4B MOBP SLC2A1 SEZ6L2 DDN ADAM9 HSPA5 HSP90B1 PFDN2 SRP9 LRRC58 AGT RPL22L1 MBOAT2 SFXN1 SLC24A3 SLC6A1 ANLN FAM102B LAMP5 IMPAD1 GLG1 TCP1	1	118	PTGDS SGK1 PGRMC1 PLIN4 FAM107A FTH1 MAL CDKN1A GABARAPL1 SRSF5 B2M HPCAL4 GSTM1 SULT1A1 ALDOC WFS1 MANF PKIA BAIAP3 LY6H GDA RPL10A PNCK ZCCHC12 RHOU INSIG1 DNAJB9 RESP18 UCHL1 NFKBIA RPL31 GLUL NBEA HINT1 RPL6 RASL11B TSC22D3 GSTM5 ZCCHC18 EPHX1 CSRP1 CIRBP CTXN2 RPL10 SH3GL3 SCG5 CELF4 RPS14 PRNP PDK4 PCNP SCG2 TIMP4 PDCD4 CYB5A HPCAL1 EIF3F GAP43 FAM214A P4HB EIF4A2 PINK1 ALDH1A1 PRICKLE2 NR2…	0
drug:P2795:hormone-dn	16984	463	381	64	TNNI2 S100A11 SPARC ATP2A1 ANXA2 BGN FCER1G GRINA TNNC1 HP TNNT1 RPL3L MIF PPP1R27 MMP9 CTSB ATP6AP1 DDIT4L ARL6IP1 CTSK ANKRD23 APOE NFE2 UACA GPC1 CSRP3 MRPL42 ARPC5 CD177 TCAP ATP2A2 TFRC POMP SOD2 CDK2AP1 COL1A1 PPP3R1 PYGO2 RPN2 SNRPG COL1A2 IGF2 HMGB2 HJURP KRT15 TUBA1B MAPRE1 PFDN2 C3 KRT14 KLF1 SNRPD1 APOA2 PLA2G15 IFITM3 PSMC4 PSMA4 CDCA7 FKBP4 KLF5 PDIA3 TLR2 PLOD3 ENO1	1	180	PVALB RPLP1 CKM UBB RPS14 TNNT3 HSPB6 FTH1 MYL2 UQCR10 COX5B COX7C CHCHD10 NDUFA4 AHSP FABP3 UQCRH ELANE RPL9 CRYAB COX4I1 NDUFB8 RPS20 FHL1 PFKM CST3 UQCR11 ASB2 COX7A1 CKMT2 ALDH2 RPL3 CD52 LTF RPS13 MYL6 LGALS3 PRR13 RPL5 RPS9 HDC NDUFV1 TMBIM6 RPL18 PFN1 RPL35A NDUFA3 COX6B1 RPL37A COX5A DCN NDUFA2 BTF3 UBL5 NDUFA6 CTSG PGLYRP1 RPL27 GPX3 PARK7 RPL36AL MYL3 EEF1A2 PDK4 FAU EIF3F COX17 RPS25 R…	0
drug:P2573:4,4'-diaminodiphenylmethane|inhibitor|(2Z,3Z)-bis\{amino[(2-aminophenyl)sulfanyl]methylidene\}butanedinitrile-up	16984	303	278	38	ALPP OPN3 NKX2-1 FBN1 SLC38A4 CFHR1 PNMA2 NTM MEGF6 GPNMB LMCD1 CDH11 GABRE SCD SLC5A3 FADS2 G6PD DAB2 DPYSL2 PHTF1 ISG15 ABCA7 TNFSF9 TRIB2 ARL4C IFITM3 GNE PLXNA3 CD55 SREBF1 DHCR7 ARID5B WNT5A LPCAT1 NREP TNS3 NEBL TSGA10	1	147	CYP1A1 AKR1C3 AKR1C2 ID4 RNASE4 ABCG2 RGL1 LARP6 EDIL3 SECTM1 LMO3 SELENBP1 ABCA8 LIMCH1 LSS MVP SLC25A1 SMARCD3 NR3C1 OLFML2A ID3 ACYP2 SULT1C2 GNAI1 CA11 AHNAK2 SLC22A18 NDRG4 ID1 PDE9A PINK1 SOCS2 SYNC CTSO CYP39A1 DENND3 PDGFD RABAC1 GSTA4 RCAN2 DDX60 SLC25A23 RAB4B GSTM4 AMT HCFC1R1 ACSL1 PPP1R3C PNRC1 PCYOX1 MALL VIPR1 HPGD ABHD4 TIPARP FHL1 TGFBR3 ST3GAL5 ARMCX1 LRRC23 TMEM140 TMEM53 FUCA1…	0
drug:P4422:pharmaceutical-dn	16984	362	292	39	ASS1 APOC1 KNG1 APOE APOA2 APOH RBP4 AHCY HP IFITM3 C9 AQP9 ASGR1 AMACR PAH IGFBP1 MAT1A GLS2 LIPC F2 FMO1 SDS BAAT ADK FABP7 SERPINA10 CCT6A PROC DNAJA1 KMO CTSB MMP14 CYP1A2 NPM1 GRINA DDAH1 ONECUT1 NUDT4 POMP	1	152	CDO1 FABP1 PCK1 FBP1 MT1A RNASE4 GSTA1 ALDOB CTH CLU G6PC METTL7B SULT1A1 TAT ACADM MT2A GNMT RPS3A PIGR CRIP2 ABHD14B HSD17B6 NDUFA4 SPINK1 ITM2B RPL9 RPL15 B2M COX4I1 SOD1 TSC22D1 CD81 ALDH2 SLC25A5 RPS9 ACADL FAU NDRG2 RPL4 FTH1 COX7B SLC37A4 RPL29 RPL36 RPL36AL RPS29 HADHB RPS23 OTC DECR1 RPL31 RPL11 RPS27L RPL6 SLC25A3 HPD RPS13 MARC2 BHMT SUCLG1 RPS8 AKR1A1 HAGH RPL18 RPL27A RPS27A GABARAP …	0
drug:P4424:pharmaceutical-dn	16984	347	276	40	ASS1 APOA2 PAH IFITM3 C9 APOC1 APOE CYP1A2 AHCY AQP9 AMACR C3 CRP MAT1A RBP4 BAAT IGFBP1 FMO1 APOH SRD5A1 GLS2 KMO IGF1 ENO1 GNS DPYS CTSB SDS TTPA MIF LIPC ONECUT1 DDAH1 MMP14 GNE GM2A HP GRN FABP7 ADK	1	141	PCK1 CDO1 HBB FBP1 METTL7B ALDOB BHMT HSD17B6 HBA2 CTH G6PC TAT ABHD14B GNMT ITM2B CRIP2 MGST3 B2M FAU SULT1A1 NDRG2 RNASE4 FGA CD81 APOM RPS14 GSTA1 RPL11 RPL9 PXMP2 RPL36AL APOC3 MT1A HPD TSC22D1 PHB2 MARC2 PIGR SOD1 OTC ALDH2 RPS3A PAPSS2 RPL18 MDH1 NDUFB4 ABCD3 ID2 NDUFB9 SLC37A4 F10 TMBIM6 ACY1 ATP6V0C GLUL SDC2 HSD17B2 KHK RPL36 GOT1 CPQ MPST ENPP2 ALAD OAZ1 RPS27L FABP1 TMEM59 TMEM47 MAOB …	0
drug:P2433:4,4'-diaminodiphenylmethane|inhibitor|(2Z,3Z)-bis\{amino[(2-aminophenyl)sulfanyl]methylidene\}butanedinitrile-up	16984	309	289	46	ALPP OPN3 NKX2-1 FBN1 PNMA2 CDH11 SLC38A4 GABRE CFHR1 NTM TRIB2 GPNMB MEGF6 LMCD1 SCD SLC5A3 WNT5A DPYSL2 FADS2 PHTF1 G6PD ISG15 DAB2 GNE S100A3 NRP1 ABCA7 DHCR7 SPARC FAT1 CD55 IFITM3 POLM PLXNA3 TNS3 LIPG ARID5B ZNF264 NREP APOC1 SAMD9 LPCAT1 SREBF1 LRRC37A2 ASS1 KIAA0355	1	146	CYP1A1 AKR1C3 AKR1C2 ID4 LARP6 RNASE4 ABCG2 RGL1 EDIL3 ID1 LSS ID3 NR3C1 SELENBP1 ABCA8 SECTM1 MVP SLC25A1 SMARCD3 ACYP2 SULT1C2 LMO3 AHNAK2 GNAI1 OLFML2A SLC22A18 LIMCH1 CA11 PDE9A PINK1 PDGFD NDRG4 SYNC TGFBR3 TGFB1I1 CTSO RABAC1 CYP39A1 DENND3 GSTM4 DDX60 RAB4B SLC25A23 PCYOX1 RCAN2 MT1E PPP1R3C PNRC1 VIPR1 ABHD4 PMP22 AMT ACSL1 ARMCX1 FHL1 ST3GAL5 HCFC1R1 MALL HPGD GSTA4 TMEM140 INSIG1 TMEM53…	0
drug:P2993:haloperidol|hydridoaluminium|risperidone|Xanthomatosis, Cerebrotendinous-up	16984	524	459	66	ARPC5 ZWINT FKBP1A CRYM SLC24A2 MOBP TUBA1B DDN FABP7 FOXG1 DNM1 YWHAB ATP6V1A GRINA YWHAZ PRKCG CPNE7 CNP BCL11B MAP2K1 USP14 MORF4L2 ATP6AP1 NSF OLA1 YWHAG MIF HMGN1 PTGES3 PSAT1 CLTC DOCK4 CTSB PSMB2 SPARC ATP6V1C1 ICAM5 GGH NEBL PPP3R1 RNF182 THY1 ATP6AP2 HSP90B1 RPL22L1 HNRNPK KCND2 SKIL SLC6A1 CHST1 HNRNPH1 HSPH1 OPALIN HSPA5 ENO1 LAMP2 SET PGM2L1 CANX SPTAN1 PSMA7 ACSL4 NRP1 HEY1 NALCN NRC…	1	224	HPCA ACTB PLP1 ITM2B CPE FTH1 NNAT TUBB2A DYNLL1 UBB SCG2 CPNE6 SPARCL1 NPTX1 FGF13 CAMK2B PRNP NDRG4 RNASEK TPT1 RHOB TTR OLFM1 CST3 HBA2 PPP1CC UCHL1 SNCA HBB MRFAP1 NELL2 S100B PEBP1 GABRA5 RPS23 WASF1 RTN4 NEFL GRIA2 CALY CD81 ITM2C SLC22A17 RPL27A RPL5 SKP1 SPON1 MT3 SLC25A5 PRDX2 MGST3 ARPC2 BTG1 QDPR ATP6V0C CDO1 PCDH19 VPS29 NDUFA4 RPS9 CHCHD10 DBI PFN1 UQCR11 BCAS1 NDRG2 COX5B RPS13 SLC2…	0
drug:P3561:N-nitrosodiethylamine-dn	16984	479	368	65	SRD5A1 CYP1A2 FGL1 C3 HP CRP APOA2 APOC1 FETUB AHSG C9 MAT1A C4BPA ASS1 APOH SERPINA6 PAH AMACR CFHR1 HRG TTPA ITIH1 SLC38A4 ADK F2 PLG RBP4 FN1 LAMP2 BST2 F12 BAAT C4B KMO ACSL4 SLC25A13 SERPINA10 CPB2 LIPC NIT2 AHCY NNMT HAL AQP9 FABP7 ITIH2 LYPLA1 ABCB11 AGT DHCR7 ASGR1 DPYS IGFBP1 PDIA4 TRIM24 F5 CLDN2 ONECUT1 IGF1 IFITM3 BBOX1 SLCO1A2 HAMP GLS2 CTSC	1	180	A1BG FABP1 APOC3 HPD RNASE4 BHMT MT2A SERPINC1 TTR OAT HSD17B6 CDO1 AASS PHYH PCK1 ALDOB HBB MSMO1 PIGR FGA UBB PODN ANG SULT1A1 CAT HBA2 RARRES2 IDI1 GSTA1 FTH1 GHR RPL26 NDRG2 TM7SF2 FBP1 HACL1 GNMT ALDH6A1 RPL9 IFI27 INSIG1 CHCHD2 CYB5A SOD1 BTG1 C8G RGN CD36 SULT1C3 OAZ1 RPS14 TPT1 DPT CHCHD10 DBI RPL10 CPA1 PGRMC1 BHMT2 PAPSS2 ERRFI1 SERINC1 COX4I1 RPS29 PXMP2 TMBIM6 COX7B NDUFA4 EHHADH SDC2…	0
drug:P3563:N-nitrosodiethylamine-dn	16984	487	376	73	CYP1A2 APOA2 SRD5A1 AMACR FGL1 ITIH1 FETUB APOC1 MAT1A C9 C4BPA HRG BAAT APOH PAH CRP C3 F2 AHSG CFHR1 HP PLG SERPINA6 SLC38A4 RBP4 TTPA LIPC F12 ASS1 ITIH2 CPB2 ABCB11 AHCY ADK AGT C4B DPYS SLCO1A2 FABP7 PROC NIT2 ACLY FN1 HAMP LAMP2 LYPLA1 SLC25A13 SERPINA10 AQP9 CTSC KMO MARC1 ASGR1 HAL BST2 SERPINF2 UBD DHCR7 FADS2 HES6 PYGL NNMT IGF1 GLS2 RCL1 PCSK9 CHDH ACSL4 SDS TGFBI RARRES1 BBOX1 SLC17A2	0.999999	180	FABP1 A1BG CDO1 RNASE4 HPD APOC3 SULT1C3 RGN ANG SERPINC1 BHMT HBB PCK1 PODN RARRES2 GNMT OAT PIGR HSD17B6 NDRG2 ALDOB HBA2 MSMO1 C8G TTR MT2A AASS FGA PHYH DBI BHMT2 FBP1 OTC SOD1 SULT1A1 CHCHD2 HACL1 IDI1 CAT HSD17B2 CYP7A1 GRHPR GSTZ1 UBB PXMP2 ERRFI1 CYB5A COX7B TM7SF2 TMBIM6 ACOX2 CTH ACADM CHCHD10 KLKB1 GHR ANGPTL3 IFI27 ALDH6A1 APOM SPINK1 SDC2 ETFB ACSM1 VKORC1 PECR F10 HAGH OAZ1 ADTRP UB…	0
drug:P818:-dn	16984	356	259	48	APOE APOA2 RBP4 APOC1 HP TTPA PLG HSD3B7 MAT1A CREG1 AHCY C4B APOF AQP9 DIO1 C3 SLC22A1 LAMP2 F2 HRG CFHR1 SERPINA11 F12 LIPC INO80 RNF149 HSPD1 SLC25A13 DNAJA1 GJB2 NIT2 BBOX1 COX6B2 HSP90AB1 AGT ELOVL3 PROC SERPINF2 FETUB PPA1 FGL1 SCO2 KRT18 ATP11C CYP17A1 FPGS CHDH INHBC	0.999989	139	FABP1 BHMT APOA4 RETSAT APOA1 TTR CYB5A ACADM EHHADH ALDH1A1 CHCHD10 APOC3 PHYH GNMT ALDOB CHCHD2 CAT EEF1A1 EPHX2 HPD SERPINC1 RNASE4 B2M PGRMC1 FBP1 ECI1 ERRFI1 PEBP1 HSD17B4 KXD1 EPHX1 STARD10 RPL26 CDO1 RPL10 RPLP1 CTSE ANGPTL3 VNN1 FGA ACAT1 CMBL ACOT2 COX6B1 FTH1 GRHPR RPL34 C8G ALDH3A2 ACOX2 PLIN2 RPL18A CD81 ETFB RPS14 RGN NDUFA1 CYP7A1 SCP2 APOB ECI2 COX4I1 GPX4 NR1I3 EIF4A2 REEP6 DHRS4 …	0
drug:P5539:inhibitor|protein polypeptide chain-up	16984	440	370	53	TUBA1A VSNL1 DNM1 HOPX SQLE ATP6V1A SLC39A10 STMN1 PGK1 HSP90AB1 TRIM32 SPTAN1 CAMK2N2 KCNAB2 HSPH1 RPL7 CRYM LAMP5 CACYBP HSP90B1 GRM5 THY1 TOMM20 ATP6V1C1 SRP9 SYT13 PSMA4 LRP11 CLSTN1 TMEM132A NAE1 RRP1 DZANK1 GAD1 KCNJ10 CTNNB1 PGM2L1 YWHAZ HSPA1B NIPA1 TCP1 CIAO1 FCF1 CSE1L KIF3A ZIC1 CYB5B HEXB DNAJA1 YWHAB PRPS1 PSMD12 NETO1	1	185	TUBA1A STMN2 SLC17A7 SERINC1 UCHL1 ITM2C EIF4A2 EGR1 PRNP NDRG4 VAMP2 ATP6V0E2 ATP6V1D NEFM NPTN RAPGEF2 FTH1 SGK1 DSTN RTN1 EEF1A2 GPM6A GDE1 CALM1 GOT1 PEBP1 ATL1 GNG3 NRSN1 TPPP CALM2 FBXW7 SRSF5 AMPH CHCHD2 COX6A1 RHOB ATP6V0C NNAT PGRMC1 SEC23A NACA NPTX1 ATP6V1G2 NAP1L5 SLC4A10 RIMS1 NDFIP1 RPL23A TSPYL4 AK5 PCBP1 HIGD2A CNR1 SCG5 WBP2 RABAC1 SH3GL2 CELF4 DYNLL2 NAP1L2 MRFAP1 TRAPPC2L HPCAL…	0
drug:P5537:inhibitor|protein polypeptide chain-up	16984	330	266	47	STMN1 LAMP5 SLC39A10 FAM81A PDP1 PPP1R1B NLK VSNL1 DUSP14 GAD1 TUBA1B PPME1 TUBA1A PGK1 CLSTN1 ATP6AP2 TMEM132A PFDN2 NTM DZANK1 DOC2A CACNG3 FAM49B TBR1 HS3ST2 LMTK2 BHLHE40 SYNPR ATP6V1C1 GABRA3 HSPH1 OSBPL8 LINGO1 EXPH5 IVNS1ABP DEK OLFM2 ATP6AP1 NUDT4 COCH TOMM20 HOMER1 PSMC4 PFKP POMP CCT2 PRPS1	0.999998	137	CALM2 PTGDS PENK SCG5 GPM6A NGEF OSBPL1A RGS4 ITPR1 NRSN1 NDFIP1 CKB CCK NPY VTI1B HPCAL4 EGR1 TAGLN3 CADM4 GLUL SERINC1 GNG3 VIP PDE1B CRIP2 SCN4B NDRG4 CALM1 NEGR1 CPNE5 GAP43 GABRA1 PPP1CA MAT2B CAMK2G GABARAPL1 ATP2B2 ATP6V1D CHCHD10 TUBA1A NPTN GDE1 SLC2A13 IGFBP6 STMN4 AP2M1 SYTL2 COX6A1 COX4I1 NAP1L5 STARD10 PVALB COX7A2 OAZ1 RCAN2 GLRB RPS14 BRK1 DNER BNIP3 COX6B1 PFKM NAP1L2 NRN1 RPL4 CH…	0
drug:P5536:inhibitor|protein polypeptide chain-up	16984	420	327	40	DDN APOE SERPINE2 PLA2G7 SYNPR RPL22L1 INO80 PRKCG RPL7 HNRNPA3 LRRC58 RASGEF1A ADCY1 HSP90B1 SNRPE FOXG1 GRM5 SHANK3 CAMK2N2 CRYM PGBD5 PLS3 UBA2 HSPA5 ITGB8 HSP90AB1 PKP4 PRPS1 SF3B1 SBK1 MBOAT2 PSMC4 ZBTB11 FAM49B IL18 TOMM20 TTYH3 DSP TRIM32 SNRPB	1	171	RPL31 SCG5 MT3 NNAT SST RPLP2 GPM6A CCK RPL13 WFS1 CST3 GLUL PSD RPS29 RPL4 WIPF3 SPARCL1 OLFM1 NPTN EGR1 RPLP1 RHOB QDPR RPL23A RPS14 RPS23 OAZ1 NDUFA1 ATP1A2 RPS27A UBE2E1 CHCHD2 ATP6V1D EID1 DENND5A FTH1 COX6A1 NR4A1 ITM2C JPH4 NEFL COX4I1 NDUFV1 RAPGEF2 CLU HPCA PTGDS RPL10A EEF1B2 NDRG2 NPTX1 AMPH KXD1 ARL3 RPL32 UBA52 CAMK2B NDUFB5 RPS5 SNCB RPL26 UBC GPX4 DNER CALM1 CAMTA2 NPY NBEA FRRS1L …	0
drug:P5652:N-methyl-D-aspartic acid|enzyme inhibitor|dimethyl sulfoxide|glutamate(2-)|solvent-dn	16984	588	507	92	MORF4L2 CDK2AP1 RPL7 ARL6IP1 APOE PDPN POMP GRINA F2R SERPINH1 CCT4 PSMD3 SPP1 GSPT1 FKBP9 NREP CDCA3 MAPRE1 SBK1 PSMC4 LLGL1 SNRPF HAT1 TNFAIP1 UBAP2 SNRPD1 TRIM28 GM2A SOX9 ATP6AP1 DDAH1 PSMA7 COPB2 SUDS3 EIF4A3 MCM5 MRPL17 MRPL42 MNS1 BST2 CCT3 RANBP1 PYGO2 PGM2 MMP14 HSPH1 PSMA1 TRAP1 GRN IFITM3 SRSF1 ARGLU1 DNTTIP1 TIMM17A SFXN1 CDK1 STIP1 FARSB FKBP1A TUBA1C PSMA4 CTSB MIF NT5DC2 PPME1 PLK1…	1	230	CST3 PRNP FTH1 RPL13 COX4I1 TMBIM6 RPS5 CD63 MYL6 EIF3F RPS29 B2M FAU IGFBP5 COX7C CALM3 ITM2C RPS11 RPS20 RPL11 GJA1 SLC25A5 MMD2 LGALS3 RPS15 NDN CRYAB ITM2B ZCCHC18 RPL34 RPL10A HINT1 EIF4H CD81 COX5B EDF1 MLLT11 HIGD2A NDUFA12 DHRS1 BTF3 RPS9 ATP6V1E1 PTN BAG1 COX6A1 CLU PARK7 PSMB6 PPP1R1A UQCR11 HSPA2 CTNNA1 DYNLRB2 PTTG1IP CHCHD10 GSTA4 CPE VPS28 RPS8 UQCRC1 UQCRC2 COX6B1 TBCA RAB11B PFN1 …	0
drug:P2517:4,4'-diaminodiphenylmethane|inhibitor|(2Z,3Z)-bis\{amino[(2-aminophenyl)sulfanyl]methylidene\}butanedinitrile-up	16984	330	308	44	OPN3 NKX2-1 ALPP FBN1 PNMA2 CDH11 SLC38A4 CFHR1 WNT5A GPNMB NTM LMCD1 MEGF6 SLC5A3 FADS2 SCD GABRE TRIB2 G6PD DPYSL2 PHTF1 FSCN1 BICC1 MCTP2 GNE ABCA7 IFITM3 TNS3 LPCAT1 SREBF1 DHCR7 NREP CD55 TNNT1 POLM KIAA0930 ARID5B IGFBP7 TGFBI FZD2 NRP1 CUL4B NOS3 LRRC37A2	1	161	CYP1A1 AKR1C3 AKR1C2 RNASE4 ID4 RGL1 LARP6 EDIL3 LMO3 ID3 ID1 ABCG2 NR3C1 MVP SMARCD3 SECTM1 LIMCH1 SLC25A1 SELENBP1 PMP22 SULT1C2 CA11 SLC22A18 GNAI1 AHNAK2 OLFML2A ABCA8 NDRG4 LSS GSTA4 SYNC DDX60 CYP39A1 ARMCX1 TGFBR3 PINK1 SLC25A23 RCAN2 RABAC1 PDE9A HCFC1R1 PDGFD ST3GAL5 DENND3 GSTM4 ACSL1 MALL PPP1R3C TGFB1I1 PCYOX1 CTSO AMT GLYR1 VIPR1 PNRC1 INSIG1 ALDOC FUCA1 NBEA HPGD RAB4B TCEA2 MRPS6 T…	0
drug:P5747:dimethyl sulfoxide|paracetamol-up	16984	272	221	28	AHCY C3 HAMP BCAP31 NIT2 SERPINE1 LAMP2 MAT1A SPTAN1 RDH16 ASS1 NAA38 LYPLA1 SLC38A4 TMEM123 POMP GRN ABCB11 HSPA5 CLTC CD47 SRP9 ATP6AP2 TNFRSF12A RBP4 YWHAG CTSB SLC25A22	1	122	ACOX1 ABCD3 PHYH BTG1 ADTRP ACADL SLC37A4 FBP1 PCTP TMEM14C HADHB HEXIM1 DECR1 OAZ1 P4HB POLR2L RNASE4 TXNIP GSTA5 RETSAT HACL1 PODN HSDL2 HSD17B4 QDPR GPD1 NUDT7 SAR1B GSTM1 ECI2 PECR EHHADH PEX11A DBI ETFB NDUFB10 SMPD1 FUCA1 UQCR10 PPCS CD59 ETFDH EPHX2 MRFAP1 SLC25A20 PARK7 LIPA MTTP ACO1 TMEM59 NDUFA6 CDO1 ACADVL ACOT12 B2M ACADM CAT ALDH3A2 TMBIM6 COX14 UQCRH SRSF5 GLRX5 SUCLG2 EPHX1 STARD1…	0
drug:P5355:organophosphorus compound|ethyl-dn	16984	450	383	51	NPPA TNNC1 TNNI3 MYH6 CSRP3 BAMBI BZW2 MIF VCAM1 LAPTM4B DSP COL5A2 ADD3 MRPL15 PTGES3 STARD7 AGT C4ORF46 RANBP6 NEBL CPVL SNRPG FASTKD1 RAI14 CD24 IARS2 EIF2S3 AZIN1 ZMAT3 TMEM41B XPR1 IFITM3 PNPT1 FAT1 CCZ1B MAPRE1 DAP3 BIRC6 DHX15 FAM220A RPL7L1 ANP32E SYNPR MRPL13 CORIN ANLN LBH XIRP1 FMR1 YAP1 C12ORF75	1	192	MYL2 MYH7 MYL3 CRYAB COX6B1 HSPB3 FHL2 UQCRQ FAU PKIG SRP14 MYBPC3 NDUFA1 FABP3 SRPX NDUFB9 SH3BGR ITGB1BP2 UNC45B GYG1 NDUFA3 NDUFAB1 NDUFA4 COX7C RPS29 OST4 APOBEC2 SEC31B COX8A RPS20 ETFA UQCRH GABARAPL2 CHCHD10 CISD1 RPL36 NDUFA12 SLC25A5 ACTN2 NDUFV2 CASQ2 SLC27A6 POPDC2 NDUFA8 GOT1 ARMCX6 ACTR10 SOD1 PFKM RPL32 MRFAP1 SLIRP PSME1 CSRP2 NDUFA6 COX7B PPP1CC RBPMS2 MOAP1 TCEAL4 GHITM RPL10 RRA…	0
drug:P5354:organophosphorus compound|ethyl-dn	16984	321	274	35	BAMBI TNNC1 NPPA IFITM3 CD24 TNNI3 COL5A2 MYH6 SRP9 CREG1 SPARC ADD3 LAPTM4B PSAT1 AGT COL4A1 CPVL BTBD1 MIF CSRP3 ASS1 NEBL LUM MARCKSL1 RAI14 LBH FKBP9 C4ORF46 PCNA RCN2 ZMAT3 DAG1 XPOT MANBA VCAM1	1	154	MYL2 MYH7 MYL4 SRPX MYL3 PLN ABLIM1 PKIG NDUFA1 SMPX CSRP2 DHRS9 SRP14 TP53I3 MYBPC3 GYG1 NDUFA4 SH3BGR COX6B1 UNC45B NDUFA3 FTH1 FHL2 UQCRQ FABP3 NDUFB9 COX14 NDUFA12 COX7C GABARAPL2 DCAF6 COX8A POPDC2 ITM2B SOD1 ETFA PSME1 NDUFS2 APOBEC2 PRDX5 YPEL5 SCP2 GABARAP LRRC49 DECR1 FGF13 RPL13A MLLT11 DYNLT1 CUTA ALDH2 NAP1L3 ATF4 UQCRH MYL9 SLC27A6 ARMCX2 NDUFB11 HADHB CASQ2 MOAP1 GLRX CISD1 NDUFA8 C…	0
drug:P5357:organophosphorus compound|ethyl-up	16984	247	215	29	MYH6 XIRP1 TNNC1 IFITM3 CSRP3 BZW2 GPI TIMP1 TNNI3 LBH NKX2-5 CTSB AGT TNFRSF12A RPN2 FZD2 S100A11 HOMER1 DUSP27 TXNDC12 DSP TCAP MAP2K1 ASS1 MLEC MRPL15 CPVL ECM1 ATP6AP1	1	118	FHL2 MYH7 MYL2 CRYAB MYL9 DCAF6 PFN1 CKM MYL3 GOT1 MYL4 SLC25A3 GABARAP UQCRC1 SH3BGR POPDC2 TGFB1I1 CNN1 PFKM RNASEK PLN TP53INP2 DENND5A CFL1 FLNC COX8A NEXN CAPNS1 BVES NCOA4 COL21A1 ACTN2 FABP3 MYOZ2 CD81 SMPX ATP6V0D1 KLHDC8B NDUFB11 PKIG RBPMS2 GJA1 MRFAP1 RCAN2 CRIP2 CHCHD10 HIGD2A EEF2 NDUFS2 FITM1 ITGB1BP2 SDHA NDUFV2 ILK AP2M1 DAD1 CD63 RPL32 PCBP1 CISD1 UNC45B PRDX5 BAG3 OXA1L ANXA6 SM…	0
drug:P5356:organophosphorus compound|ethyl-dn	16984	303	257	38	NPPA BAMBI MYH6 TNNI3 TNNC1 IFITM3 SPARC ADD3 TGFBI CD24 SH3KBP1 COL5A2 RAI14 MIF PSAT1 XPOT HSPA1B COL4A1 CREG1 RCN2 CPVL AGT GPX8 LYPLA1 SRP9 TUBA1A FASTKD1 LAPTM4B ASS1 RCN1 MRPL15 PCNA LUM MMP1 FAM220A VCAM1 MARCKSL1 NEBL	1	145	MYL2 MYH7 MYL4 SMPX TP53I3 SRPX MYL3 FABP3 CRYAB UNC45B CSRP2 NDUFB9 UQCRQ PKIG ARMCX2 DHRS9 NDUFA1 RPL13A GYG1 COX6B1 MYBPC3 NDUFA4 ISCU COX7A2 MLLT11 ABLIM1 SH3BGR SRP14 APOBEC2 GABARAP NDUFA3 DYNLT1 MYOCD COX8A SLC25A3 COX14 NDUFB5 NDUFA12 NDUFS2 ARMCX6 DCAF6 COX7C DECR1 POPDC2 ID2 CUTA PRDX5 HSPB3 CHCHD10 DYNLL1 UQCRH SERF2 ITM2B HADHB MYOZ2 GLRX ETFA NDUFA8 PSME1 CISD1 ARL6IP5 UQCR10 ALDH2 C…	0
drug:P5350:organophosphorus compound|ethyl-up	16984	255	211	35	BAMBI SPARC CD24 NPPA IFITM3 TUBA1A HSPA1B TGFBI SH3KBP1 CREG1 MARCKSL1 LAPTM4B TNNC1 TNNI3 BTBD1 SRP9 COL5A2 LYPLA1 RCN2 LUM ADD3 YWHAG RCN1 PCNA ASS1 COL4A1 ECM1 AGT MPLKIP CPVL PSAT1 MMP1 CDK2AP1 RLIM RAI14	0.999997	121	MYL2 MYL4 DCAF6 SMPX SRPX PLN MLLT11 DHRS9 TP53I3 MYH7 ABLIM1 MYL3 MSMO1 ARMCX2 GABARAP CSRP2 PKIG TUBA1A ITM2B MYOCD CCNG1 SLC25A3 MYBPC3 NDUFB9 COX7A2 GYG1 ISCU NDUFA4 FABP3 ARL6IP5 RPL13A UNC45B GLRX CDIPT COX14 SH3BGR SRP14 ARMCX6 ALDH2 FGF13 DECR1 UQCRQ TPT1 PRDX5 YPEL5 NDUFB5 CUTA AK3 CRYAB SERF2 NDUFA1 CPE OAT HADHB PSME1 PHYH HMOX1 POPDC2 SCP2 UBB ID2 C4ORF3 MYL9 COX8A NDUFS2 SCOC TCEAL8 …	0
drug:P5353:organophosphorus compound|ethyl-dn	16984	291	245	39	BAMBI TGFBI IFITM3 SPARC TNNI3 SH3KBP1 ADD3 NPPA CD24 COL4A1 MIF XPOT PSAT1 COL5A2 HSPA1B TNNC1 RAI14 CREG1 GPX8 RCN2 AGT MARCKSL1 PCNA RCN1 ASS1 FASTKD1 SERPINH1 CPVL RPN2 SRP9 LUM YWHAG MPLKIP MMP1 FKBP9 LAPTM4B FAM220A EIF4EBP1 ECM1	1	131	MYL2 MYL4 TP53I3 SRPX MYH7 MYL3 RPL13A DCAF6 SMPX CSRP2 CRYAB PKIG DHRS9 ARMCX2 UNC45B MLLT11 SH3BGR MYBPC3 NDUFB9 UQCRQ FABP3 ABLIM1 GABARAP NDUFA3 ATF4 NDUFA1 COX6B1 APOBEC2 ISCU GYG1 PRDX5 SRP14 COX14 ID2 RPL3 COX8A CUTA NDUFA4 DYNLT1 DECR1 GLRX ITM2B ALDH2 MYOCD NDUFS2 ARMCX6 OAZ1 PSME1 SERF2 SSR4 NDUFB5 CHCHD10 CCNG1 DYNLL1 SLC25A3 OST4 NDUFB10 CASQ2 ARG2 TIMP3 COL21A1 CDIPT POPDC2 NDUFA12 N…	0
drug:P5352:organophosphorus compound|ethyl-up	16984	295	254	29	TNNC1 TNNI3 IFITM3 BAMBI CSRP3 NPPA MYH6 SPARC LAPTM4B AGT GPI CPVL SH3KBP1 COL5A2 CD24 ASS1 CREG1 MARCKSL1 HSPA1B LYPLA1 BTBD1 LBH YWHAG CTSB MRPL15 ADD3 MIF ECM1 FKBP9	1	154	MYL2 MYH7 MYL4 MYL3 CRYAB FHL2 PLN SMPX DCAF6 SRPX FABP3 MLLT11 GABARAP NDUFB9 PKIG MYBPC3 MYL9 NDUFA4 SLC25A3 SH3BGR COX8A POPDC2 ABLIM1 UNC45B ARL6IP5 COX6B1 UQCRQ ARMCX2 SRP14 ISCU NDUFA3 CISD1 NDUFA1 COL21A1 APOBEC2 PRDX5 NDUFS2 TP53INP2 GYG1 COX14 CHCHD10 HSPB3 NDUFV2 CKM ACTN2 NDUFB5 DHRS9 UQCRH DECR1 RNASEK PFKM ARMCX6 CDIPT GOT1 HIGD2A NDUFB11 TP53I3 NDUFA12 SERF2 SCP2 PSME1 ITM2B HADHB N…	0
drug:P5749:bis(2-ethylhexyl) phthalate|dimethyl sulfoxide-up	16984	243	205	28	CRP ABCB11 LACTB2 PSAT1 FER1L5 DHCR7 SHMT2 S100A11 SERPINE1 MARC1 F2 SLC25A13 UBD MAL2 CHUK SPTAN1 BAAT PSMD2 SRD5A1 SERPINE2 MIOX VMP1 RAD21 MOSPD2 MAT1A TGM2 EBPL CLTC	1	119	EHHADH FABP1 ACOX1 GSTA5 ECI2 HSD17B4 HACL1 ALDH1A1 ABCD3 VNN1 HSDL2 DECR1 GSTA4 PCTP RETSAT ACADM EPHX2 HADHB ADTRP INSIG1 TXNIP CD36 OAT GPD1 ACO1 ACADL ALDH3A2 MTTP FBP1 CREB3L3 ACADVL AGMO CIDEA SUCLG2 PODN MSMO1 CPT2 SLC6A13 NUDT7 CMBL TMEM14C SAR1B ACO2 EPHX1 CHCHD10 LIPA ALAS1 ACOT12 SLC25A20 ETFDH ACOT2 ME1 CHPT1 SUCLG1 PDK4 MRPS18A LPCAT3 IDI1 BPHL PEX11A SLC22A18 EGLN3 ACADS ADI1 PDHB H…	0
drug:P4486:biotin|phosphoprotein phosphatase inhibitor-up	16984	377	322	45	SPP1 ASS1 GRINA PAH PLAU IGF2R LAMP2 IGFBP1 CCDC6 FMO1 HMGN1 ATP6V0A4 S100A10 HSP90B1 CTSB HSPA5 SFXN1 PTCD3 SLC22A1 CLDN2 PSAT1 HAVCR1 S100A11 ZWINT GRN DAB2 HNRNPK PARD6B C4B SLC34A3 SYNE2 LRRC8D HNF1B SERBP1 GGH MFN1 CCT4 UBD TOMM20 C1QBP PTGES3 NUAK2 MORF4L2 PERP SUGT1	1	164	HPD RPL5 HBA2 SULT1A1 OAT GSTA5 RPS20 HBB EHHADH SOD3 RPL27A NDRG1 ZFP36L1 RPL11 RPS15A RPS6 RPS8 RPL4 PHYH RPS3A RPS14 RPL10 MT2A CYB5A RPL23A SDHA RPS5 RPL9 RPL26 RPL15 FAU NCOA4 RPL34 EEF1B2 EPHX2 RPL18A SLC7A9 RESP18 GSTA4 RPL31 RPS27A RPS15 MRFAP1 ACTB NACA RPL18 GLYAT ERRFI1 RPS23 PCBP2 MARC2 RPS13 CHPT1 RPS29 TMBIM6 ABCG2 XDH TPT1 HMOX1 GLUL RPL27 UQCRC2 RPS9 CMBL FUCA1 BTG1 UBA52 SPINK1 A…	0
drug:P4487:biotin|phosphoprotein phosphatase inhibitor-dn	16984	366	298	51	MIOX CTSB LACTB2 PAH AMACR COL3A1 IGFBP7 DAO HSPD1 SPARC SLC22A6 SLC22A12 ASS1 CRYM LRP2 FAM111A HEXB HSPA5 PROM1 RPL22L1 OPLAH OSBPL8 COL4A1 DAB2 COL1A2 LYPLA1 AQP2 HSP90AB1 CLTC CALB1 MCCC2 GPI CCDC6 NCBP1 KMO SLC39A8 LAMP2 FN1 RARRES1 DDAH1 CXCL16 RDH16 TNFRSF11B SEC61G DHCR7 GNPDA1 COL1A1 NIT2 SLC25A13 HSP90B1 CDH16	1	163	ALDOB RGN FBP1 GPX3 RETSAT OXCT1 ACOX1 CNDP2 AGXT2 UQCR10 COX7A2 SPINK1 AKR7A3 PCK1 MGST3 ACADM CAT ACSM2A AKR1A1 FTH1 GRHPR CHCHD10 HAGH PDZK1 PECR COX6A1 NDUFB9 ANPEP NAT8B ALDH1A1 EPHX2 ACY3 FABP3 INMT GGT1 NAT8 DCXR CHCHD2 HADHB BHMT2 PEBP1 ACO2 APOM SUCLG2 ACADL SUCLG1 SLC25A5 BPHL COX4I1 EHHADH LRPAP1 CD81 SLC12A1 ALDH9A1 NDUFB5 AASS CD63 PEPD HGD UQCRB NDUFB2 ACY1 SLC25A3 UQCR11 FUCA1 UBB …	0
drug:P4009:17beta-estradiol|streptomycin|penicillin|puromycin|dextran-up	16984	377	335	57	COL3A1 CTSK FN1 LUM TIMP1 OSR2 SPARC MDK IFITM1 FAP IFITM3 CTSB COL6A3 IGFBP7 RPL7 THY1 COL4A2 TGFBI LAMB1 TSPAN6 CTTN MXRA8 RCN1 CLTC TRIP6 CTHRC1 SPTAN1 TUBA1C NFAT5 DKK1 TMEM200A CANX DVL3 SERPINH1 SOX4 PXDN ANXA2 SKIL CNOT2 CRABP2 LOX HTRA3 SPON2 SH3BP4 CALU BTG3 PTK7 FAM155A PLEC CTBP2 CDH13 CTSC LOXL2 PCOLCE NREP LTBP2 EXOC1	1	166	ZFP36L1 FHL2 CD63 EIF3L LGALS3 LRP10 ATP6V0E1 IGFBP6 CYB5R3 RPS24 CDKN1A DYNLL1 DDX5 MFAP4 RPL32 EEF1A1 DSTN TBX3 TMEM59 TMEM98 CD59 MAMDC2 RPL37A RPS11 GSN EEF2 FTH1 UBC ITM2B RPL13 MATN2 B2M TSC22D1 CALM2 RPL27A CD81 PCBP2 TWIST2 VEGFB NPTX1 MYL6 PAMR1 TPT1 RAMP1 ADI1 TCEAL2 RPLP1 COX7C SCG5 NSA2 DYNLT1 EDF1 PSMB6 ZBTB4 PEBP1 HCFC1R1 RPL34 F10 TOMM7 ARL6IP5 TAGLN CHP1 TMEM14C RPS9 EXOC7 PDLIM4 …	0
drug:P831:cobamide-up	16984	423	310	45	APOA2 APOE RBP4 C3 APOC1 PAH AHSG HP AHCY PLG HRG MAT1A HAMP F2 IFITM3 APOF KNG1 AGT INO80 SERPINA6 FASN HSD3B7 SDS C9 GLS2 CYP1A2 SLC38A4 ITIH2 GRN PPA1 BST2 IGFBP1 SERPINA11 KMO HAL CRP SREBF1 APOH KRT18 PGK1 FADS2 PROC SERPINF2 F12 COL18A1	1	160	APOA1 ALDOB TTR HPD KXD1 FBP1 FABP1 EEF1A1 FGA APOC3 GNMT B2M PHYH BHMT RPL10 SERPINC1 INMT RPS29 FTH1 CYB5A CHCHD10 UBA52 CHCHD2 SDHB RNASE4 TTC36 SULT1A1 OAT COX6B1 PGRMC1 RPL18A RPL13 RPLP1 COX4I1 RPL4 RPL27A CLU RPL26 ACSL5 TAT MARC2 COX6A1 RGN GOT1 AADAC STARD10 RPLP2 UQCR11 RPS5 PLIN2 HEBP1 RPS15 UQCRB C8G RPS11 CAT SLC37A4 IFI27 ETFA P4HB RPL3 HAAO FAU FXYD1 APOA4 NDUFV3 KHK SELENBP1 RPS14…	0
drug:P835:cobamide-dn	16984	416	289	43	APOE APOA2 RBP4 APOC1 C9 IFITM3 APOF F2 SERPINA11 HRG PLG SERPINA10 AHCY C3 HSPA1B HP AHSG KNG1 FMO1 LIPC MAT1A INO80 PROC HSD3B7 FASN CYP1A2 IGF1 HSP90B1 HAMP NREP C1QBP ELOVL2 SERPINF2 AMACR FETUB DNAJA1 HHEX CHDH TTC39C COL18A1 SUCNR1 MARC1 CSRP3	1	154	BHMT FABP1 APOA1 TTR FGA ALDOB RPS29 FBP1 KXD1 EEF1A1 B2M HPD APOC3 RPLP1 ALAD ALDH1A1 SERPINC1 CAT C8G ANGPTL3 APOA4 CHCHD10 FTH1 GNMT RPL10 CLU PM20D1 PGRMC1 SLC2A2 EPHX2 CTSE CHCHD2 RPL3 UBA52 COX4I1 LGALS9 RPL31 MSRB1 ACADM CYB5A REEP6 RPLP2 RPL13 DBI INMT HEBP1 RPL4 PNPLA7 NDUFA1 RPL18A GLRX5 NDUFV3 ACSL5 RPL36AL RPS11 RPL27A SAR1B COX6A1 COX6B1 UQCRB UQCR11 BCKDHB RPS15 NUDT7 RPL10A KLKB1 F…	0
drug:P837:cobamide-up	16984	434	328	51	APOA2 APOE PAH C3 APOC1 AHCY RBP4 AHSG PLG MAT1A HP HRG HAMP F2 IFITM3 APOF SERPINA6 AGT SLC38A4 GLS2 SDS FASN ITIH2 KNG1 SERPINF2 CYP1A2 IGFBP1 FETUB PROC COL18A1 GRN SREBF1 ASGR1 FADS2 HAL BST2 HSPD1 KRT18 INO80 APOH PPA1 ASS1 F5 MARC1 PYGL RNF149 ITIH1 PGK1 NNMT F12 SLC25A22	1	163	APOA1 HPD ALDOB FBP1 TTR FABP1 EEF1A1 FGA APOC3 KXD1 GNMT B2M FTH1 PHYH SERPINC1 OAT BHMT GOT1 CHCHD10 CHCHD2 SULT1A1 TAT RPL10 RNASE4 INMT RPS29 UBA52 MARC2 SELENBP1 STARD10 TTC36 ACSL5 CLU FAU SDHB COX6B1 RPL4 COX6A1 PGRMC1 CAT CYB5A RPL18A TMBIM6 P4HB RPLP2 SLC37A4 DBI RPL13 RPL27A RPL3 UQCR11 PLIN2 CTH RPLP1 PCYT2 AKR1A1 CDO1 SRSF5 METTL7B ACTB RPS5 OAF PIGR RPL11 UBC LGALS9 G6PC IFI27 HPN ET…	0
drug:P355:ethanol|dexamethasone-up	16984	473	434	83	MMP7 ANXA2 SERPINE1 COL1A2 TGFBI NNMT EIF2S3 DKK1 OPN3 HSPA5 ARPC5 LOXL1 LMCD1 DDAH1 TFB2M SERPINH1 MORF4L2 EPS8 CALU ENO1 PABPC3 RAP2B SNAI2 TNPO1 SPARC CNN2 TOMM20 ADAM9 SEC61G P4HA1 NBPF10 GOLPH3 ANXA1 KPNA2 AIDA UBE2S RLIM PABPC1 MXRA8 PCOLCE HIF1A CDH11 YWHAZ POLE3 WNT5A PXDN S100A10 TMEM123 CCNB2 YTHDF2 SLC39A6 PTGES3 DEK CANX PLS3 SLC25A32 TNS3 FADS3 YME1L1 FAIM DNAJA1 FXR1 RAP2A ASAP1 COP…	1	201	PTGDS TAGLN PTX3 DPT PLAC8 PTTG1IP TXNIP MYL9 PRSS23 GLUL ANGPT1 MME PFN1 MXRA7 CSRP1 GJA1 OLFML3 CAV1 CALM2 RPS15 BTG1 RPL10A SRP14 CD81 ACTB BNIP3 PALLD TSC22D3 PMP22 RPL23A RPS5 LEPROT PAPSS1 MT1E MTCH1 RTN4 DSTN FAM114A1 SSR2 RHOA NDUFA4 CCNG1 RPL13A PPP1CC LGALS3 TCEAL4 SERF2 JTB VAPA SLC25A6 UBC RPL4 PLIN3 RPL11 SEC31A RABAC1 FKBP5 TMEM59 P4HB RPS8 DCN OAZ1 ARL6IP5 DAD1 MKNK2 RPS25 RPL27 EE…	0
drug:P2531:4,4'-diaminodiphenylmethane|dimethyl sulfoxide|inhibitor|(2Z,3Z)-bis\{amino[(2-aminophenyl)sulfanyl]methylidene\}butanedinitrile-up	16984	315	294	45	ALPP OPN3 NKX2-1 FBN1 PNMA2 SLC38A4 CDH11 TRIB2 NTM CFHR1 WNT5A GPNMB MEGF6 LMCD1 SLC5A3 GABRE DAB2 SCD DPYSL2 NRP1 PHTF1 G6PD FADS2 SPARC FZD2 ISG15 GNE ABCA7 IFITM3 POLM TNNT1 TNS3 ARID5B CD55 NREP S100A3 FASTKD1 APOC1 SREBF1 CUL4B DHCR7 FAT1 ASS1 SAMD9 AGTPBP1	1	148	CYP1A1 AKR1C3 AKR1C2 ID4 RNASE4 LARP6 ABCG2 RGL1 LMO3 EDIL3 NR3C1 ID1 ID3 GNAI1 MVP SMARCD3 SECTM1 SELENBP1 LIMCH1 ABCA8 PMP22 LSS SLC25A1 SULT1C2 AHNAK2 SLC22A18 CA11 OLFML2A TGFBR3 ARMCX1 PINK1 ACYP2 PDGFD DDX60 NDRG4 CYP39A1 SYNC RABAC1 TGFB1I1 DENND3 CTSO SLC25A23 GSTM4 GSTA4 RCAN2 PNRC1 AMT PCYOX1 RAB4B PPP1R3C ACSL1 HCFC1R1 FHL1 PDE9A ST3GAL5 SOCS2 ABHD4 HPGD MALL VIPR1 TMEM140 FUCA1 TMEM53…	0
drug:P4933:trichostatin A|inhibitor|histone deacetylase inhibitor-up	16984	299	264	43	TM4SF1 SERPINB2 CCL20 LMCD1 HSPA1B OXTR HILPDA ANXA1 SNRPG XIRP1 VASN SBSN DPM1 SLC12A8 GNS MMP10 ZNF486 DNAJB11 EIF4A3 STRAP STK4 STAT1 IL18 TPR VCAM1 MAPRE1 SERPINE1 ATP6V1A ILF2 CCDC6 CD55 THY1 ALPP HSD17B7 PPA1 HSPA5 MYH9 PRG4 IGF2R TUFT1 SLFN11 CCT8 TXNDC12	1	136	FLNC CRYAB HSPB6 ACTA2 CSRP1 OAZ1 FOS NFKBIA RPL31 NDUFB3 DUSP1 SLIRP MYL9 EGR1 MFAP5 GLRX5 ZFP36 RGS2 SPARCL1 CRISPLD2 TPT1 CALM1 DCN CNN1 TIMP3 CST3 DUSP5 RPL11 HSPA2 NDUFA2 PJA2 IGFBP5 CALM2 RPL26 PLAT MDH1 UQCRQ EMP1 JUN RPL35A LPP ERRFI1 NOSIP COX7A2 RPS20 IGFBP6 COX6A1 CRADD RPL27 UQCRHL KLF2 GADD45B RPS15A CD81 RPS5 RPS6 MYH11 DAD1 DES LRRFIP1 SMOC2 CITED2 RPS24 PPP1R3C RPS25 RPL27A DUSP19…	0
drug:P2794:hormone-dn	16984	515	411	54	TNNI2 S100A11 TCAP RPL3L ATP2A1 FCER1G GRINA MIF MYH4 IFITM3 PPP1R27 DDIT4L ANXA2 TNNC1 GPC1 MRPL42 CTSB SOD2 BGN CSRP3 POMP TNNT1 KRT15 HP SNRPG SPARC CDK2AP1 IGF2 ANKRD23 PFDN2 PGM2 MYH9 TRIM72 TIMM17A NREP CD177 KRT14 HK2 ARL6IP1 RANGAP1 STAC3 CACNG1 NFE2 HJURP SMTNL2 ATP2A2 SNRPD1 APOA2 MMP9 C3 PRPF19 ARID3A ATP6AP1 PYGL	1	210	RPLP1 PVALB CKM RPS14 TNNT3 AHSP UQCR10 CHCHD10 COX5B RPS20 FTH1 NDUFA4 UQCR11 COX7C UBB COX7A1 COX4I1 NDUFB8 UQCRH NDUFA3 COX5A HSPB6 RPL9 RPL37A COX6B1 SLC4A1 NDUFA6 RPL35A CD52 RPL34 FABP3 NDUFS7 ALDH2 ELANE NDUFA2 RPS13 NDUFA1 FAU RPL36AL FHL1 PARK7 RPL27 RPS9 RPL18 COX17 RPL23A CRYAB HRC PGLYRP1 RPS27L UBL5 PRR13 ASB2 RPL10 RPS8 NDUFC1 RPL3 RPL5 LGALS3 GSTO1 MYL6 PPP1R3C NDUFV2 HIGD2A SERF2 …	0
drug:P5301:curcumin|messenger RNA-up	16984	397	366	54	TUBA1A ATP6V1A SCD DDN PPP3CA MAL2 NSF MTPN KCNAB2 PRKCG ATP6AP1 PGM2L1 YWHAG ENC1 ADCY1 SLC24A2 MIF GRIN2B KCTD13 FKBP1A THY1 NRCAM CTSB ATP6AP2 SEMA5A CACNG8 SPRN ENO1 GRINA MFAP3L LY6E DUSP7 NCEH1 DAGLA NRP1 SLC15A2 DNM1 CDC40 ACTR2 SERBP1 GABBR1 SNRPD1 SNX10 MORF4L2 SLC30A3 RPL7 LRRN1 PAFAH1B2 ATP6V1C1 CSNK2A1 PIP5K1A SLC24A3 SCN2A GPI	1	183	CAMK2A HPCA GRIA1 UBB TUBA1A SLC17A7 SYP CALM3 NELL2 GABRA5 ATP6V0C GRIA2 COX8A CALM1 ACTB CABP7 OLFM1 DAD1 MAP1B SERINC1 GRIN2A RNF14 EPHA7 UCHL1 TAGLN3 GPM6A WFS1 HPCAL4 NAPA OPCML LIX1 PTK2B UQCR11 SERPINI1 RPLP1 ARPC2 CST3 CDC42 LGI1 CAP1 PRKCE UBL7 CAMK2B WASF1 KCTD4 WDR1 RTN1 ATXN7L3B LRRTM1 CCK GABRA1 SLC25A11 NR3C2 SNCA CALM2 NCALD PLP1 SYT4 SNCB PJA2 GRIA3 RPL9 COX5A NDUFB2 TMEM50B CNKSR…	0
drug:P3544:ethanol|5-amino-1-(5-phospho-D-ribosyl)imidazole|dopaminium(1+)-dn	16984	345	272	33	C4B GJB6 PLA2G7 PMCH HSP90B1 ZIC1 TUBA1B THY1 ANLN SEC61G MOBP SEZ6L2 HSPA5 SLC24A3 CHORDC1 LAMP2 ANKRD34B IFITM3 CCP110 SFXN1 PDCD5 HSP90AB1 F2R SPARC CPLX1 FASN KCNJ10 PSMD14 ALDH5A1 LRRC58 PDIA4 CANX IFIT3	1	151	PTGDS SGK1 GLUL ALDOC GSTM5 ALDH1A1 MANF FAM107A ABHD4 GSTM1 SLC25A18 DNAJB9 COX4I1 B2M UQCRH ACTB CHCHD10 FTH1 GPX4 RABAC1 CSRP1 CYB5A RPL36AL GSTA4 FXYD1 PVALB TIMP4 NDRG2 NDUFC1 COX6A1 TTR COX6B1 GABARAP RPL34 CST3 RAMP3 RPL10 UCHL1 PHYH UNC13C MAOB HINT1 CNTN1 OSBPL1A RESP18 ISCU SDHB RPS15 NDUFA6 NEFM MARC2 CCK LYNX1 MRPS18A NDUFV3 ARL6IP5 ALDH6A1 GPLD1 ME1 PFKM IFI27 NDUFS3 EPHX1 RPL32 COX5…	0
drug:P4680:benzoate|17beta-estradiol|protein polypeptide chain|estrogen-dn	16984	534	482	81	ELN COL1A2 HSP90AB1 CTSB IGF1 SPARC PABPC1 ANXA1 NCL COL4A1 HMGN1 HSPA1B APOE UBA2 TGFB3 ALG8 TGM2 C4B HSPH1 CR1L ATP2A2 TINAGL1 CXCL9 AMIGO2 NREP COL1A1 LMCD1 GPI XPO7 STT3B COPB2 OLFML2B COL18A1 HSPA5 IGFBP7 CRABP2 CYP26B1 COL15A1 PDCD5 RBM39 CIAO1 LAS1L WDR33 SNRNP70 AEBP1 NID2 RTKN NACC1 EIF4G1 PSMC1 NOS3 USP14 APAF1 ADAMTS9 TTC27 MRPS35 TCP1 CCT6A MRPL30 PGK1 COL5A1 CCT3 PNPO IPO9 LRRC32 UBQ…	1	228	TAGLN PCK1 CIDEC TXNIP MYH11 MYL9 RPS6 CFD CST3 GLUL CNN1 RPL9 RPS9 TPT1 DYNLL1 MFAP4 TP53INP2 RPL6 TPM2 CPE RPL29 CRIP2 PNPLA2 RPL10 FHL1 KANK2 PDLIM3 CD151 SPARCL1 WFDC1 RPS29 FLNA LYVE1 MRVI1 RPL32 CLU ERRFI1 FXYD1 ACTN1 RPS15 SERF2 NNAT PRNP RBP7 CFP SORBS2 CCDC107 HEXIM1 ZEB1 AKR1A1 NEXN GKN1 GDA PNLIP SNCG HAX1 LRRFIP1 NDUFB10 NPDC1 DUSP3 HSPB6 RPL23A SOD3 UQCRC1 TMEM140 GNB1 CSRP2 SECISBP2…	0
drug:P4681:protein polypeptide chain|equilin|estrogen-dn	16984	531	470	91	IGF1 IGFBP7 SPARC COL1A2 NREP ELN ECM1 COL1A1 HMGN1 ATP2A2 PCOLCE TINAGL1 CTSB HSPA5 UBA2 CR1L PABPC1 FNDC1 COL5A2 GPX8 TGFB3 HNRNPK HSPA1B AMIGO2 HSPH1 OLFML2B COL4A1 SNRPE TCP1 CTPS1 DPYSL2 ARGLU1 SERPINE2 TGM2 COL15A1 ITGBL1 LOX SF3B1 NID2 CXCL9 LAPTM4B CNP TIMP1 TTC27 ALG8 AEBP1 PLCG1 COL18A1 HNRNPM NCL HSP90AB1 LRRC32 LOXL1 PDAP1 XPO7 PDCD5 PSMA4 YWHAB CPZ LUM SPTAN1 LMCD1 IFITM1 CNOT10 GPI …	1	212	NNAT TAGLN MYL9 MYH11 CPE CST3 CNN1 TPM2 SPARCL1 FHL1 TP53INP2 WFDC1 RPL32 MFAP4 PDLIM3 DCN DYNLL1 FLNA MRVI1 CLU KANK2 ITM2B GKN1 EEF1D CXCL12 RPS20 RPS6 CRIP2 RPL9 ZEB1 AKR1A1 RPS9 RPS8 RPS15 SORBS2 RPS3A RPS11 DUSP1 PPP1R14A SERF2 RPL29 CD81 TXNIP MRFAP1 NEXN SYNPO2 CD151 CLEC10A ITGA8 RPL37A PLAC9 CSRP2 PMP22 EIF3G ATF4 CALM1 TLN1 TSPAN2 SMPD1 EEF1B2 BAG3 RPL3 TBCA PRSS23 USE1 PRNP COX7A2L RP…	0
drug:P4811:ochratoxin A-up	16984	381	316	39	CDH16 ENO1 CTSB DAO GNS TUBA1B LRP2 GRN TUBA1C FMO1 AQP2 SLC22A6 PMEPA1 DAB2 DDAH1 ACP5 OPLAH IGF2R PLAU TUBA1A IGFBP1 GRINA ATP6AP1 ANXA2 CD24 MIF SPP1 SERPINH1 HNF1B LOXL1 ARPC1B S100A10 TOMM20 PSMA7 CDK4 EIF3B SPARC SNRPB BGN	1	158	GPX3 MT2A AKR1A1 ACY1 CD63 DNASE1 AKR7A3 UQCR11 CST3 SLC25A3 SLC3A1 ATP6V0C SLC25A5 ALDH1A1 RPLP2 AGXT2 COX8A MGST3 MDH1 COX7A2 NDUFB4 SLC6A8 HSD11B2 UBB MT1A PCK1 COX4I1 FABP3 AKR7A2 AMN PPP1R1A CKB RPL9 SLC25A4 RPS14 CSRP2 TCN2 ITM2B CRTAP NDUFB9 ALDOB NDUFB2 RPS27A GGT1 RPL11 MGLL GPX4 PTTG1IP CRYAB FBP1 SLC22A2 IDH3G FAU SOD3 GABARAP RPL6 RPL31 RPS5 FTH1 COX5B SDHA SLC37A4 MRFAP1 AP2M1 RPS11 …	0
drug:P4813:ochratoxin A-dn	16984	386	314	35	CDH16 ENO1 CTSB DAO SLC22A6 GNS PMEPA1 LRP2 PLAU TUBA1B FMO1 GRINA POMP GRN AQP2 DAB2 IGF2R MIF DDAH1 TUBA1A OPLAH PSME4 ACP5 TUBA1C CD24 CALB1 TOMM20 ATP6AP1 EIF3B GJB2 PSMA7 HNF1B DHFR SLC22A13 ANXA2	1	170	GPX3 AKR1A1 AKR7A3 ACY1 MT2A COX8A CD63 SLC3A1 FBP1 UQCR11 MDH1 COX7A2 UBB COX4I1 NDUFB2 AGXT2 DNASE1 MGST3 FAU ATP6V0C SLC25A3 NDUFB4 AKR7A2 HSD11B2 RPLP2 GGT1 FTH1 RPS29 ALDH1A1 SLC25A5 RPS27A RPL9 NDUFB9 RPL11 UBC RPS11 CRYAB NAT8B FABP3 COX5B NDUFA4 SLC22A2 CST3 RPL31 ALDOB MGLL PCK1 TCN2 RPS8 RPS9 RPL18 AMN SLC6A8 RPL29 RPL6 PPP1R1A RPL27 NDUFS7 NDUFV2 PRDX2 RPS14 MT1A PHB2 KHK RPL18A CRTAP …	0
drug:P4815:ochratoxin A-dn	16984	323	269	28	SLC22A6 DAO GRINA ASS1 CTSB FMO1 AHCY APOE IGF2R POMP SLC22A1 DIO1 PAH SLC22A13 PLAU MIF GJB2 DHFR PREP KMO AMACR PMEPA1 CPSF4 AGT PSMD2 IFITM3 CHDH F2	1	150	HBA2 GPX3 HBB AKR7A3 SPINK1 ACY1 PCK1 FBP1 AKR1A1 TTC36 MDH1 APOM NAT8B GSTA1 SLC3A1 HAAO AKR7A2 SLC37A4 NDUFB9 ALDOB SLC22A2 NDUFS7 GAMT KHK ABHD14B SOD1 TMBIM6 GSTO1 MGST3 TST ALAD GSTA5 NDUFA3 PDK2 GPX4 FAU NDUFA4 METTL7B NDUFC1 HAGH MPST SLC25A11 EPHX1 MEP1A MAP2K2 BLVRA GLUL LDHD ESPN SLC22A18 G6PC COX8A GGT1 RPL29 MARC2 PTGDS CTDSP1 SLC25A5 SLC6A8 RPL9 COX5B UBB RESP18 FUCA1 USE1 QDPR ALDH2…	0
drug:P4814:N(6)-(1-carboxyethyl)-L-lysine|ochratoxin A-dn	16984	214	175	21	SLC22A6 GRINA FMO1 DAO PLAU PSME4 AHCY SLC22A13 PREP POMP PAH PSMD2 KMO GJB2 DIO1 STMN1 HSPD1 SLC25A30 DHFR KCTD13 TUBA1A	1	107	SPINK1 SLC3A1 GPX3 TTC36 RPS29 AKR7A3 NAT8B ACY1 HAAO UBC MDH1 AGXT2 FBP1 SLC22A2 TPT1 NDUFS7 KHK SOD1 FAU GSTA1 MEP1A ALAD AKR7A2 RPL9 PCK1 NDUFB2 NDUFB9 RPL29 COX7A2 ALDH1A1 RPS3A RPS6 OAT GAMT APOM CRYAB GSTA5 GGT1 ESPN HBA2 BLVRA GSTA4 ACSM2A HBB LDHD NDUFA3 GLUL NDUFB10 RPS8 SLC4A4 NDUFV2 MT1A HAGH NDUFA4 FAM214B MAP2K2 FUCA1 CTH SLC2A5 PLLP RPL36AL PPP1CC NDUFB3 CTDSP1 ABAT SLC22A5 RPL4 SLC…	0
drug:P4817:ochratoxin A-dn	16984	349	283	29	ENO1 CDH16 CTSB DAO SLC22A6 TUBA1C TUBA1B GRN GRINA GNS LRP2 PLAU PMEPA1 MIF AQP2 DAB2 IGF2R TUBA1A OPLAH DDAH1 FMO1 ACP5 HNF1B POMP PSMA7 ATP6AP1 CD24 SLC22A13 KCTD13	1	157	GPX3 AKR1A1 ACY1 AKR7A3 COX8A CD63 HBB MT2A UQCR11 COX4I1 SLC3A1 MGST3 RPLP2 HBA2 MDH1 NDUFB2 DNASE1 FAU COX7A2 AKR7A2 SLC25A3 ATP6V0C HSD11B2 RPS14 GGT1 AGXT2 GPX4 RPL11 FTH1 CST3 UBA52 COX5B RPS11 RPL31 NDUFA4 CRYAB RPL18A NDUFB4 RPL18 RPS27A NDUFB9 FBP1 ALDH1A1 NAT8B OAZ1 TCN2 MGLL FABP3 SLC22A2 RPS5 SLC25A5 PEBP1 RPL29 UBB RPL36 RPL10A SLC6A8 RPS29 RPL9 RPS9 NDUFA3 PPP1R1A AMN APOM NDUFS7 RPL…	0
drug:P4816:ochratoxin A-dn	16984	367	300	35	CDH16 ENO1 CTSB SLC22A6 TUBA1C DAO GNS TUBA1B PMEPA1 GRN LRP2 PLAU DAB2 MIF AQP2 FMO1 IGF2R DDAH1 OPLAH POMP TUBA1A CD24 CALB1 TOMM20 ATP6AP1 ACP5 GJB2 GRINA PSME4 EIF3B STMN1 PSMA7 YWHAZ SPP1 ARPC1B	1	160	GPX3 AKR1A1 AKR7A3 ACY1 MT2A SLC3A1 CD63 UBB UQCR11 COX8A COX4I1 AGXT2 MDH1 RPLP2 DNASE1 AKR7A2 SLC25A3 SLC25A5 COX7A2 GGT1 RPS27A RPL11 HSD11B2 NDUFB2 ALDH1A1 RPL31 RPS14 RPL9 RPS11 FTH1 FBP1 FAU MGST3 UBA52 RPS8 ATP6V0C NDUFA4 UBC NAT8B TCN2 APOM FABP3 RPL29 COX5B CST3 CRYAB GPX4 SLC22A2 RPL18A MGLL RPL26 NDUFB9 HBB RPL6 RPL27 RPL36 NDUFB4 PPP1R1A RPS5 CRTAP AMN ACO1 AP2M1 RPS9 NDUFV2 RPS23 SLC…	0
drug:P4819:ochratoxin A-dn	16984	259	204	17	SLC22A6 GRINA ENO1 DAO PLAU SLC22A13 POMP PREP AHCY DIO1 CTSB IGF2R AGT MIF NEURL3 STMN1 CCT3	1	121	RPS29 GPX3 SPINK1 ACY1 HBB NAT8B TTC36 SLC3A1 COX8A SOD1 MDH1 HAAO ALDOB UBC HBA2 CRYAB NDUFA4 GSTA5 GSTA1 NDUFS7 FTH1 RPL27 AKR7A3 GAMT APOM UBB RPL29 NDUFC1 ESPN RPS25 KHK GGT1 GLUL PTTG1IP MEP1A RPL18A RPS11 CD63 TST HSD11B2 ECHS1 BLVRA SLC22A2 TXN2 NDUFB2 UQCR11 GSTO1 ALAD RPL18 FUCA1 PHB2 FBP1 HAGH NDUFB10 NDUFB9 FAU NDUFB4 LAMTOR1 SLC25A3 METTL7B IVD COX5A AKR7A2 MT1A NDUFB3 SLC23A3 SLC25A1…	0
drug:P4818:ochratoxin A-dn	16984	359	294	31	CDH16 ENO1 CTSB DAO SLC22A6 TUBA1B GNS GRN LRP2 PLAU PMEPA1 GRINA MIF AQP2 DAB2 TUBA1C IGF2R TUBA1A DDAH1 OPLAH FMO1 HNF1B ACP5 TOMM20 SLC22A13 ATP6AP1 CD24 KCTD13 SERPINH1 DIO1 POMP	1	158	GPX3 AKR1A1 ACY1 AKR7A3 MT2A CD63 COX8A HBB SLC3A1 UQCR11 MDH1 DNASE1 HBA2 RPLP2 SLC25A3 NDUFB2 HSD11B2 AGXT2 GGT1 COX7A2 MGST3 AKR7A2 FBP1 RPL31 SLC25A5 NDUFA4 ATP6V0C COX4I1 NDUFB9 RPS27A CST3 CRYAB RPL11 NDUFB4 RPS11 FTH1 COX5B MGLL NAT8B SLC22A2 FABP3 FAU UBB RPS14 SLC6A8 GPX4 RPL9 RPL29 PPP1R1A AMN ALDH1A1 PEBP1 TCN2 CRTAP RPS29 NDUFA3 RPL27 CSRP2 PTTG1IP PRDX2 AP2M1 NDUFV2 SCAMP2 IDH3G SLC2…	0
drug:P5224:-dn	16984	341	273	33	HRG AMACR FMO1 PDIA4 MIF RBP4 FETUB HPRT1 PAH DNAJA1 TCP1 SERPINA6 SERPINA10 HAMP HP SLC17A2 RARRES1 C4B HAL HHEX FGL1 PSMA1 POMP CHDH PTGES3 RDH16 PSMB2 HSPD1 KPNA2 CHORDC1 TMEM62 LBP NBN	1	139	HBA2 HBB HSD17B2 RETSAT HACL1 SULT1C3 NAT8 UBC CHCHD10 DECR1 HSD17B11 UBB ALDH1A1 CDO1 PHYH GLUL FMO5 NDRG2 PTGR1 XDH UGP2 HPD UGT2B15 EIF4EBP3 MT2A ALAD INMT HADHB TST SPINK1 ADH5 CYP7A1 RCAN1 HSD17B4 CYB5A ACSM2A APOM MSMO1 CHCHD2 GDE1 COX4I1 MGST2 VNN1 ADH4 GCNT2 RPS13 RPS5 SULT1A1 DNAJB9 CHPT1 FAU FECH MGST3 SELENBP1 SLC25A5 NDUFB9 COX7B MARC2 ACOT12 ECHDC2 EHHADH TAT CPT2 ABCG5 RPS3A SRP14 M…	0
drug:P2867:hormone-dn	16984	381	320	45	ANXA2 SPON2 TNFAIP1 LOXL1 GPRC5A PDPN AGRN POMP F2R IFITM3 SCARF2 NREP RPN2 HP CCND1 NRP1 S100A11 CYB5B ATP6AP1 DRAM1 DUSP7 SOD2 TUBA1B TGM2 CHST1 HMGN1 MIF COL4A1 MORF4L2 SRSF9 FMO1 C4B GPC3 SLC1A3 MRPL17 BLCAP PODXL MRPS17 ELN PRMT1 FBN1 GRB7 RDM1 EDN1 CDK2AP1	1	160	SFTPD INMT SFTPC RPLP1 GPX3 RPS14 CRIP2 COX4I1 RPL9 ERRFI1 FHL1 SELENBP1 CHCHD10 RPS20 CKB UQCR10 FAU CAV1 RABAC1 ISCU CSRP1 KLF2 BAG1 NDUFA4 SOD1 HERPUD1 MYADM PRNP NDUFB8 ALAS1 UQCR11 HIGD2A TMBIM6 SCNN1B NDUFA2 FTH1 UBB KLF9 MFAP4 ALDH2 NUPR1 NDUFA3 TSPAN7 PRELP ABHD14B HDC GSTK1 SFTPA1 PARK7 TMEM109 BAG3 GATA2 UQCRH VPS28 HINT2 PRMT2 OAT CTNNA1 RPL36AL MYL6 DYNLRB2 CD81 TXNIP DUSP1 ACTA2 RPL3…	0
drug:P5176:toxin-up	16984	290	246	24	TUBA1A ADD3 PABPC3 DSP RLIM C4ORF46 BIK MARCKSL1 PPA1 TNNT1 SOX9 MIF GRN SERINC5 DSG2 TOMM20 NOB1 IFI30 SLC12A2 EPS8 KTN1 ZNRF3 PLA2G2A ITGA6	1	136	ID1 S100P RPS8 AKR1C3 TXNIP AKR1B10 TUBA1A ID3 RPS11 CCNG1 GABARAP IFI27 RPL36 RPS25 OAT EEF2 AGR2 RPL13A PFDN5 LGALS4 ITM2B MT1E ALDH1A1 MT2A ARL6IP5 CD63 PRR15 DYNLT1 RPL32 FTH1 SRP14 HADHB RPL11 RPS5 TBCA NQO1 TSPAN1 RPL29 RPL3 SCP2 UBA52 CHMP2A RPL27 RPS29 RPL34 PRDX5 CAMLG MT1X OST4 MKNK2 TMEM14A CHMP5 ID2 RPL6 PEBP1 GABARAPL2 ARRDC4 RPL36AL CTSE CAPNS1 ALDH3A1 RPL4 TST ETFA RNASEK NCOA4 MT1…	0
drug:P4833:ochratoxin A-dn	16984	369	303	39	C4B TUBA1C FASN PLG ENO1 RBP4 DHCR7 APOA2 KRT18 HSD3B7 IFITM3 PROC GRINA SRD5A1 TUBA1B GRN ASGR1 POMP GM2A MIF HSP90AB1 TP53 SREBF1 ACLY HP EIF4EBP1 FN1 FKBP1A FKBP4 EFNA1 G6PD AGT RPN2 PSMB2 CYP1A2 LEMD2 TAP1 CTSB HGS	1	153	GSTM1 COX4I1 PLIN2 MGST3 UBA52 GNMT CLU HBA2 BHMT OAZ1 COX8A TST GAMT FAU RPLP2 RPL36 TTC36 CTH METTL7B PEBP1 HBB AKR1A1 NDUFS7 ALAD APOM ALDH2 APOC3 HAAO G6PC NDRG2 GCKR UBB RPS14 ALDH1L1 FTH1 SLC22A18 RPL18A GPX4 EPHX1 PCYT2 RPS5 TMBIM6 UQCR11 SLC25A1 COX5B CD81 DAD1 KHK RPS13 RPS29 CRIP2 LGALS9 RPL11 RPL10A PFN1 GPT MPST EEF2 GSTO1 QDPR NDUFB2 PHB2 TSC22D1 PDK2 AKR7A3 RABAC1 CYP27A1 RPL18 COX7…	0
drug:P4832:ochratoxin A-dn	16984	548	453	70	C3 PLG AGT C4B RBP4 CYP1A2 TUBA1C C4BPA APOH AHCY POMP HSP90AB1 AQP9 KNG1 PAH SRD5A1 PROC LIPC ASGR1 ENO1 DHCR7 RPN2 BAAT AMACR TUBA1B MAT1A GNE IFITM3 DPYS ABCB11 PSMB2 GM2A FMO1 PSMD11 PAICS F2 FN1 SERPINA10 CTSC COL3A1 ADK HSPD1 RRBP1 DHFR HSP90B1 PSMA7 DIO1 YWHAB PSMD2 TRAP1 FKBP4 AHSG GRINA UBQLN1 PYGL CMTM6 EIF3B TP53 LEMD2 PSMC4 MORF4L2 YWHAZ HNRNPF HUWE1 SLCO1A2 TAP1 FKBP1A NUDT4 IGF1 GJB2	1	214	CLU UBB PCK1 APOA1 FABP1 MT1A GNMT APOA4 GSTM1 UBC COX4I1 CDO1 EPHX1 ALAS1 ALDOB METTL7B NDRG2 MT2A AKR1A1 SULT1A1 MGST3 RPS14 GAMT RPL36 G6PC SLC25A5 RNASE4 TMBIM6 APOM NDUFB2 F10 PLIN2 UBA52 RPL18A SOD1 OAZ1 RPS9 ALAD PAPSS2 NDUFV2 ACADM FGA RPS29 ALDH1L1 AKR7A3 RPS15 NDUFB4 RPS23 MDH1 COX8A CYP27A1 HPD P4HB FAU PTTG1IP SLC25A3 MST1 CRIP2 FBP1 RPS8 EEF2 TAT NDUFB9 ACADL INSIG1 GCKR NDUFA8 B2M U…	0
drug:P4831:ochratoxin A-up	16984	332	273	31	CDH16 ENO1 SPP1 TUBA1C GNS TUBA1B LRP2 CTSB AQP2 GRN ANXA2 DAB2 DDAH1 PMEPA1 PLAU OPLAH IGFBP1 DAO CD24 TUBA1A IGF2R EIF3B SERPINH1 ATP6AP1 CALB1 S100A10 SLC22A6 ACP5 HNF1B KCTD13 MIF	1	140	GPX3 MT2A CD63 AKR1A1 ATP6V0C DNASE1 ACY1 UQCR11 FABP3 COX8A COX7A2 SLC25A3 RPLP2 CST3 AGXT2 ALDH1A1 RPS14 RPL31 NDUFB2 RPS27A HSD11B2 PPP1R1A SLC3A1 RPL18A RPS11 NDUFB4 CRYAB RPL18 RPL10A PTTG1IP TCN2 CKB FAU RPS8 RPL13A COX4I1 MGLL GGT1 AKR7A3 AMN NDUFA4 SOSTDC1 SLC25A4 UBC TSC22D1 RPL11 SLC25A5 CSRP2 RPL36 MGST3 TSPO PRDX2 ITM2B RPL9 DYNLL1 RPS29 SLC6A8 MDH1 CRTAP COX5B HIGD2A AP2M1 RPS9 NDUFB…	0
drug:P4830:N(6)-(1-carboxyethyl)-L-lysine|ochratoxin A-up	16984	370	302	30	CDH16 ENO1 CTSB DAO TUBA1B GNS GRN TUBA1C PMEPA1 AQP2 LRP2 SLC22A6 OPLAH IGF2R DDAH1 ATP6AP1 MIF PLAU DAB2 ACP5 ANXA2 LOXL1 TUBA1A CD24 SERPINH1 IGFBP1 SPP1 PSMA7 HNF1B ARPC1B	1	161	GPX3 MT2A AKR1A1 ACY1 CD63 DNASE1 UQCR11 COX8A ATP6V0C AKR7A3 CST3 SLC25A3 RPLP2 NDUFB4 RPS14 HSD11B2 FABP3 FBP1 RPL31 MDH1 NDUFA4 MGST3 SLC25A5 ALDH1A1 COX4I1 NDUFB2 HBB AGXT2 GABARAP RPS11 FAU RPS27A RPL18 AKR7A2 PTTG1IP PPP1R1A SLC6A8 SLC3A1 COX7A2 COX5B RPL10A RPL18A MGLL AMN TCN2 GGT1 ITM2B PEBP1 FTH1 RPL11 SLC25A4 CRTAP GPX4 HIGD2A CSRP2 CKB RPS9 PRDX2 RPL9 CRYAB RPL27 RPL13A MAP1LC3A RPL36…	0
drug:P4835:ochratoxin A-up	16984	367	305	34	CDH16 ENO1 DAO CTSB GNS TUBA1B GRN LRP2 TUBA1C PMEPA1 DAB2 AQP2 SLC22A6 DDAH1 IGF2R ACP5 OPLAH PLAU MIF TUBA1A FMO1 HNF1B ATP6AP1 ANXA2 CD24 GRINA SPP1 LOXL1 SERPINH1 IGFBP1 SNRPB PSMA7 KCTD13 S100A10	1	161	GPX3 MT2A AKR1A1 ACY1 CD63 DNASE1 AKR7A3 ATP6V0C CST3 RPLP2 COX8A SLC25A3 FBP1 UQCR11 SLC25A5 COX7A2 ALDH1A1 SLC3A1 MGST3 RPS14 NDUFB4 RPL31 MDH1 AGXT2 SLC6A8 NDUFB9 CRTAP GPX4 HSD11B2 FAU AMN TCN2 RPL11 AKR7A2 NDUFB2 COX4I1 MGLL CKB GABARAP RPS27A CSRP2 SLC25A4 GGT1 RPS9 PPP1R1A FABP3 COX5B RPL9 NDUFA3 CRYAB SLC22A2 SOD3 RPS11 NDUFA4 RPS13 ITM2B RPS5 IDH3G GLUL RPL6 PPP1CA PTGDS RPL18 RPL13A AP2…	0
drug:P5750:bis(2-ethylhexyl) phthalate|dimethyl sulfoxide-up	16984	393	312	33	APOA2 APOC1 AGT FGL1 MAL2 PSMA1 LACTB2 CYP1A2 SRP9 SERPINE1 ASGR1 BST2 PLG FER1L5 PSMB2 SEC61G MOSPD2 SHMT2 TGM2 TOMM20 RPL22L1 CHUK LIPC ADK VMP1 SSR1 PSMA4 IFITM3 PDE3B MARC1 SRD5A1 HSPA5 BCAP31	1	174	PCTP ECI2 HSDL2 ACOX1 TXNIP FABP1 EHHADH HACL1 ABCD3 DBI GSTA5 ADTRP HSD17B4 GPD1 PDK4 SAR1B HADHB MOCS2 NUDT7 SERP1 DECR1 OAT PHYH CMBL EPHX2 PPCS EEF1B2 TMEM14C CHCHD2 PEX11A SLC25A20 IFI27 ETFB ACOT2 ACO1 ACOT12 C8G PDHB GADD45A ACADVL FBP1 UQCR10 DAD1 ACADM CREB3L3 RETSAT CHCHD10 ETFA MTTP GLRX NDUFA4 SSR4 SPINK1 UQCRB AGMO SERPINC1 LIPA SERINC1 GLRX5 HIBCH SRP14 MRPS18A RPS15A CDK2AP2 CISD1 …	0
drug:P2796:hormone|N-benzyladenine-dn	16984	347	302	47	TNNI2 MYH4 ATP2A1 TCAP RPL3L DDIT4L TNNC1 TNNT1 HK2 PPP1R27 ATP2A2 ANKRD23 PGM2 CSRP3 SPTB UACA MRPL42 TFRC KRT15 MYH1 GPC1 HSPA9 SMTNL2 UBAP2 NREP SOD2 CACNG1 APOA2 FKBP4 MYBPC1 MIF KRT14 NUP210 BTBD1 USP13 TIMM17A TMEM65 PHTF2 STAC3 GRINA SMTNL1 EIF4G1 STT3B C3 HSPH1 RDM1 HTATSF1	1	160	PVALB CKM TNNT3 HSPB6 TTR FHL1 COX7A1 ASB2 CKMT2 CHCHD10 UQCR10 PDK4 UQCR11 ACTN2 FABP3 COX5A COX5B NDUFB8 KY COX7C UQCRC2 MYL2 NDUFS7 PPP1R3C HRC UBC PKIA NDUFA4 TPM2 PFKM GSTO1 NDUFA3 NDUFV1 ACO2 COX4I1 DES MYOM1 NDUFC1 ATP1A2 COX6B1 SCN4B AMPD1 NDUFS3 UQCRC1 CRYAB EEF1A2 PLIN4 UQCRH NDUFA6 CHAC1 PYGM MYL3 NDUFV2 AK1 UQCRB TXNIP SGK1 MGST3 PDLIM3 PNPLA2 COX17 NDUFA2 PARK7 HIGD2A NDUFA10 SYPL2 S…	0
drug:P2797:hormone-dn	16984	363	285	25	TNNI2 TNNC1 TNNT1 TCAP CSRP3 FCER1G ATP2A2 RPL3L MIF ANKRD23 ANKRD2 MRPL42 PPP1R27 KRT15 SOD2 S100A11 APOA2 TIMM17A KRT14 PFDN2 SMTNL1 SNRPG DDIT4L APOE MRPS30	1	167	TTR HSPB6 MYL2 PVALB CKM FABP3 RPLP1 PDK4 UQCR10 COX5B TNNT3 CHCHD10 FHL1 CRYAB COX7C COX7A1 MYL3 UQCR11 COX5A RPS14 CKMT2 RPS8 ASB2 GSTO1 COX6B1 FTH1 NDUFA6 RPL9 RPL18 RPS13 RPL27 NDUFA4 EIF3F ACTN2 UQCRH RPS27L NDUFB8 PARK7 NDUFA3 RPL34 UBB NDUFC1 UBL5 BTF3 PPP1R3C RPS6 CD52 RPL23A HIGD2A UQCRC1 NDUFV1 ELANE COX4I1 ENPP2 NDUFS7 HRC KLF9 NDUFA10 UQCRC2 TPM2 UBC MYOZ2 PNPLA2 MYL6 COX8A NDUFA2 OST…	0
drug:P99:1-methyl-4-phenyl-1,2,3,6-tetrahydropyridine-dn	16984	575	510	66	HSP90AA1 C4ORF46 PPA1 TUBA1A CNP YWHAB SLC1A3 ENC1 DPYSL2 CLSTN1 TUBA1B NSF SPP1 CDK2AP1 ADD3 NBPF10 SRP9 PPP3CA VSNL1 NUAK1 DDAH1 CCT4 POMP STRAP IFITM3 DNAJA1 ZNF365 ARL6IP1 TRIM37 HPRT1 TOMM20 PPT1 TUBA1C DOCK4 GTF3A ENOPH1 ADAR MAP2K1 HAUS2 RAN USP14 SET CCP110 ARPC5 STARD7 PTPRO BTBD1 MRPL3 CRYM PFKP CREG1 PSRC1 HOPX PSMC1 AP3M2 ITGAV PCDH17 SH3YL1 AGT IMPA1 KIAA0930 APBA2 LAMP5 KLK6 VPS26A …	1	280	SPARCL1 PLP1 MLLT11 TUBB2A SOD1 RPL9 RPS15 B2M QDPR RTN1 TSC22D1 MOAP1 PEBP1 PTGDS RTN4 TTR RPS23 GPM6B CRYAB MAL RPLP1 DYNLL1 TPT1 CLDND1 RPL10 ISCU MTCH1 TUBA1A GRIA2 SERPINI1 UQCR10 RPS15A GABARAP CST3 SERINC1 FAM107A TCEAL2 MXRA7 CCNI LMO3 C14ORF132 COX8A NDUFB4 NELL2 RPS24 COX7A2 PARK7 SCG5 NDUFAB1 FAU COX6A1 MORF4L1 RPS27A FTH1 PMP22 EIF1B HIGD1A MDH1 RPS29 SNX3 SEC31B RPL34 AK5 RCAN2 CCK C…	0
drug:P98:1-methyl-4-phenyl-1,2,3,6-tetrahydropyridine-dn	16984	585	511	73	TUBA1A HSP90AA1 C4ORF46 CNP TUBA1B SLC1A3 ENC1 NSF ADD3 DPYSL2 YWHAB CDK2AP1 VSNL1 PPA1 TUBA1C CLSTN1 NBPF10 SPP1 PPP3CA SRP9 DDAH1 NUAK1 IFITM3 POMP CCT4 ZNF365 STRAP STARD7 GTF3A HAUS2 TRIM37 ARL6IP1 HPRT1 TOMM20 DNAJA1 MAP2K1 ADAR PSRC1 MORF4L2 SET PPT1 AP3M2 TCFL5 MRPL3 LAMP5 DOCK4 CCP110 USP14 PTPRO CRYM MARCKSL1 PSMD14 MEST KLK6 SLBP ITGAV RAN PSMC1 BTBD1 BHLHE41 AGT ENOPH1 TAOK1 ARPC5 HOPX…	1	272	SPARCL1 PLP1 MLLT11 TUBB2A SOD1 RPL9 RPS15 TSC22D1 B2M RTN1 QDPR RTN4 TUBA1A PEBP1 DYNLL1 CALM2 MAL ISCU RPL10 GPM6B RPS23 PTGDS CLDND1 MTCH1 GABARAP MORF4L1 UQCR10 NDUFB4 CCNI GRIA2 FAM107A MOAP1 C14ORF132 UCHL1 NDUFAB1 TPT1 SERPINI1 CRYAB RPS24 MXRA7 LMO3 EFHD1 PARK7 CHCHD2 MDH1 RPS29 AK5 RPS15A SERINC1 TCEAL2 RPLP1 NDUFA4 COX7A2 EIF4A2 PMP22 FTH1 SCG5 DBI HIGD1A SNX3 ATP6V0E2 FAU COX6A1 COX8A …	0
drug:P97:1-methyl-4-phenyl-1,2,3,6-tetrahydropyridine-dn	16984	504	445	63	VSNL1 HSP90AA1 TUBA1C TUBA1B TUBA1A CNP YWHAB PPA1 CLSTN1 ZIC1 C4ORF46 NSF ADD3 CDK2AP1 NBPF10 SRP9 DDAH1 SPP1 DPYSL2 TRIM37 NUAK1 POMP STRAP ZNF365 IFITM3 ARL6IP1 STARD7 TOMM20 CCT4 DNAJA1 SLC1A3 HAUS2 GTF3A MRPL3 ENOPH1 ADAR CCP110 BTBD1 HPRT1 PTPRO USP14 PSRC1 PFKP MOBP SH3YL1 IMPA1 RAN AP3M2 KIAA0930 LAPTM4B PSMC1 CREG1 KLK6 MARCKSL1 APBA2 TCFL5 FBXW12 AGT ARPC5 MRPS35 ENC1 SET GGCT	1	240	PLP1 TUBB2A MLLT11 SOD1 SPARCL1 RPS15 QDPR RPL9 B2M PEBP1 TTR MOAP1 CST3 PTGDS RTN1 RPL10 SERPINI1 TUBA1A UQCR10 ISCU CLDND1 GPM6B MAL CCNI C14ORF132 TCEAL2 RTN4 FAM107A NDUFB4 SERINC1 GABARAP COX8A CRYAB NEFM NEFL PARK7 NDUFAB1 EFHD1 MORF4L1 RCAN2 PMP22 DYNLL1 HIGD1A ATP6V0E2 FTH1 AK5 PAQR6 NELL2 COX7A2 DBI SNX3 SEC31B OAT EIF1B NAP1L2 HBB NDUFC1 BAALC CCK UQCRQ NRN1 UCHL1 NDFIP1 EIF3L SCG5 EVI2…	0
drug:P96:1-methyl-4-phenyl-1,2,3,6-tetrahydropyridine|glycerophosphoinositol-dn	16984	578	508	67	VSNL1 HSP90AA1 TUBA1B NSF YWHAB ENC1 C4ORF46 PPA1 SLC1A3 CLSTN1 ZIC1 PPP3CA DPYSL2 ADD3 NBPF10 SRP9 DDAH1 CCT4 TRIM37 HPRT1 CDK2AP1 ZNF365 NUAK1 STRAP POMP CRYM SPP1 DNAJA1 TUBA1C ARL6IP1 GTF3A MAP2K1 IFITM3 TOMM20 PPT1 STARD7 ADAR DOCK4 PTPRO USP14 RAN ENOPH1 ARPC5 BTBD1 PFKP MRPL3 YWHAZ HAUS2 CCP110 HOPX HSPA5 SET HSPD1 NDRG3 PSRC1 AP3M2 TUBA1A CREG1 VPS26A PSMC1 CNP IMPA1 MIF SH3YL1 PTGES3 GGC…	1	281	TUBB2A MLLT11 PLP1 SOD1 RPS15 RTN1 RTN4 RPL9 B2M TSC22D1 MTCH1 SPARCL1 QDPR NPTN PEBP1 MOAP1 MDH1 TTR SNAP25 UCHL1 SERPINI1 NELL2 RPL10 ISCU NDRG4 CALM2 CLDND1 DYNLL1 PTGDS UQCR10 GRIA2 GABARAP GPM6B TCEAL2 SERINC1 SCG5 FAM107A C14ORF132 MAL NDUFB4 COX8A NDUFAB1 PARK7 MXRA7 CRYAB COX7A2 AK5 RCAN2 TSPYL4 SLC25A3 SNX3 RPS15A COX6A1 COX5A CCNI HIGD1A RPS23 UBB ATP6V0E2 EIF1B SEC31B CST3 LMO3 EIF4A2 …	0
drug:P95:1-methyl-4-phenyl-1,2,3,6-tetrahydropyridine|glycerophosphoinositol-dn	16984	597	524	66	TUBA1B VSNL1 HSP90AA1 C4ORF46 TUBA1A NSF PPA1 YWHAB ENC1 SLC1A3 ZIC1 DPYSL2 CLSTN1 PPP3CA ADD3 SRP9 TRIM37 DDAH1 CCT4 NBPF10 CDK2AP1 NUAK1 MIF TUBA1C HPRT1 MORF4L2 STRAP ZNF365 POMP CRYM PPT1 CNP STARD7 MAP2K1 DNAJA1 ARL6IP1 SET IFITM3 SPP1 GTF3A TOMM20 ADAR PTPRO PSMD14 HAUS2 USP14 DOCK4 YWHAZ PTGES3 SLC6A1 ENOPH1 HSPD1 PSRC1 OLA1 MARCKSL1 R3HDM2 PFKP PSMC1 RAN CCP110 MRPL3 AP3M2 RUSC1 TUBB3 VPS…	1	288	SPARCL1 TUBB2A PLP1 MLLT11 CALM2 SOD1 RPS15 RPL9 RTN1 TSC22D1 MDH1 UCHL1 MTCH1 RTN4 EIF4A2 QDPR NPTN DYNLL1 B2M SNAP25 MOAP1 PEBP1 TPT1 PTGDS MORF4L1 TTR RPL34 TUBA1A UQCR10 GABARAP ISCU GRIA2 RPL10 GPM6B CHCHD2 NELL2 CRYAB CCNI MXRA7 RPS23 SERPINI1 AK5 MAL RPS24 CST3 NDUFAB1 SCG5 PARK7 TCEAL2 COX7A2 COX6A1 LMO3 CLDND1 FAM107A SERINC1 SNX3 EFHD1 KIF5C NDUFB4 C14ORF132 NDRG4 NDUFA4 RPS15A NAP1L3 C…	0
drug:P94:1-methyl-4-phenyl-1,2,3,6-tetrahydropyridine-dn	16984	597	526	70	TUBA1A TUBA1B TUBA1C HSP90AA1 C4ORF46 DPYSL2 VSNL1 PPA1 SPP1 SLC1A3 YWHAB CNP NSF SRP9 CLSTN1 MARCKSL1 ADD3 CDK2AP1 DDAH1 TRIM37 NBPF10 HSP90AB1 STRAP CCT4 MORF4L2 PPP3CA POMP PPT1 HPRT1 ZIC1 HSPD1 ZNF365 CRYM SET ENC1 NUAK1 DNAJA1 ARL6IP1 MIF ADAR STARD7 PTGES3 IFITM3 HNRNPA2B1 BHLHE41 GTF3A DOCK4 TOMM20 PABPC1 PCDH17 SLC6A1 VPS26A YWHAZ HNRNPK HAUS2 PTPRO PSRC1 MRPL3 TNS3 HSPA5 MAP2K1 AGT PFKP …	1	289	PLP1 SPARCL1 TUBA1A TUBB2A RPL9 PTGDS RPS15 TPT1 MLLT11 SOD1 TTR CALM2 MORF4L1 RTN4 UCHL1 B2M CST3 CRYAB RPS23 QDPR MTCH1 RTN1 MDH1 TSC22D1 RPL23A EIF4A2 DYNLL1 PEBP1 RPL34 RPL3 EEF1A1 RPS13 SNAP25 RPS24 MOAP1 MXRA7 GPM6B GABARAP RPL10 CCNI ISCU COX6A1 MAL SERPINI1 SLC25A3 RPS29 RPLP1 CHCHD2 UQCR10 PARK7 SERINC1 RPL13A COX7A2 TCEAL2 RPL27 C14ORF132 CLDND1 SNX3 EFHD1 RPS15A NDUFAB1 SCG5 FAM107A AK…	0
drug:P93:1-methyl-4-phenyl-1,2,3,6-tetrahydropyridine-dn	16984	566	500	79	HSP90AA1 TUBA1A TUBA1C PPA1 ZIC1 YWHAB C4ORF46 SPP1 CNP CLSTN1 ADD3 NBPF10 SLC1A3 CDK2AP1 DPYSL2 SRP9 TUBA1B DDAH1 IFITM3 POMP CCT4 NSF SH3YL1 STRAP DNAJA1 HAUS2 VSNL1 TOMM20 ARL6IP1 PTPRO GTF3A ADAR ENOPH1 ARPC5 IMPA1 PPP3CA CRYM AGT HSPD1 HPRT1 TRIM37 MRPL3 USP14 RAN BHLHE41 STARD7 PCDH17 TCFL5 CCP110 VPS26A PSRC1 PSMC1 SET ATP6V1A PPT1 KLK6 ZNF365 ITGAV EIF1AX KIAA0930 CTSB HSPA5 SERINC5 BTBD1…	1	264	PLP1 TTR MLLT11 SOD1 RPS15 RPL9 QDPR B2M MOAP1 TUBA1A CRYAB PEBP1 CST3 SPARCL1 ISCU MAL RPL10 CLDND1 TUBB2A GPM6B UQCR10 SERINC1 RPLP1 RTN4 COX8A RPS23 TCEAL2 GABARAP EFHD1 TSC22D1 RTN1 NDUFB4 SERPINI1 PARK7 FAM107A NDUFAB1 MXRA7 RPS15A RPS29 PTGDS MTCH1 COX7A2 UQCRQ NEFL MORF4L1 C14ORF132 RPL34 RCAN2 FTH1 PMP22 SCG5 ATP6V0E2 NDRG4 SEC31B HIGD1A COX6A1 EIF3L FAU COX5A SNX3 DBI EIF1B BAALC OAT GHI…	0
drug:P2844:hormone-dn	16984	291	254	40	TCAP MYH6 PPA1 APOA2 TMEM65 TNNI3 SOD2 MORF4L2 RPL3L MRPS17 PGM2 MRPL30 TGM2 HTATSF1 PSMA4 NCEH1 TFRC ADK C3 STIP1 DAG1 MRPL50 DCAF7 STT3B SLC6A6 TRAP1 MOV10L1 YWHAG SH3KBP1 CCT8 LBH CTSB APOC1 MRPS35 DUSP7 QRSL1 SUGP2 CSRP3 EIF4EBP1 CDK2AP1	1	135	FABP3 HSPB6 FHL2 NDUFA6 SGK1 ACADVL OXCT1 CRYAB COX7C COX4I1 MYOZ2 OGDH RGCC ASB2 HERPUD1 PLIN4 NDUFA8 COX5A NDUFC1 PDK4 MYBPC3 BAG3 RPS25 PTGDS ECI1 NDUFB3 ECHS1 SLC8A1 KLF2 FAM162A MGST3 SLC25A3 NDUFS4 TMOD1 GSTO1 NDUFA1 TMEM126A NDUFB5 COX10 UQCRB ABCD3 OAZ1 HADHB EPHX2 RPS13 GMPR TIMM8B ACTN2 NDUFA7 REEP5 MRPL53 PRDX5 MRPL46 RPS14 SLC2A4 POPDC2 NRN1 COX6A1 ETFA IDH3G RPL3 INPP5A ITGB1BP2 CKM …	0
drug:P2845:hormone-dn	16984	356	307	43	TCAP RPL3L TNNC1 SOD2 TMEM65 CORIN FKBP4 LBH SLC6A6 HK2 ATP2A2 APOA2 MORF4L2 PSMA4 PPA1 MRPL30 NREP TFRC MOV10L1 MRPL50 HTATSF1 FMO1 NUDT4 PDP2 DUSP7 CDK2AP1 STT3B PGM2 TIMM17A TMEM201 HAT1 NSUN4 MRPS17 GLG1 TNNI3 NEDD1 SH3KBP1 HSPA9 FUS STRAP INTS1 ACLY MYBPHL	1	174	HSPB6 FABP3 MYL2 COX5A MYL3 NDUFB8 ACTC1 CRIP2 ETFB OXCT1 ACTN2 UQCR11 INPP5A COX7C COX17 UQCR10 CRYAB FHL2 NDUFA6 RAB11B DLST ACO2 ISCU DBP NDUFA8 NDUFS7 RPL9 SLC8A1 TMBIM6 KLF2 NDUFC1 HRC TMOD1 ACADVL NDUFA4 NDUFA12 MYBPC3 ASB2 COX6B1 CPT2 SSPN GJA1 PLIN4 NDUFA10 RGCC REEP5 GMPR ABCD3 POPDC2 RAB28 CALM3 CKMT2 COX4I1 HIGD2A NDUFA3 UQCRC1 RPL3 NDUFV2 UQCRC2 NDUFB3 SPOP COX14 VEGFB COQ9 OGDH JOSD2…	0
drug:P2846:hormone-dn	16984	271	231	33	TNNC1 ATP2A2 NPPA TCAP RPL3L GPC1 HK2 CSRP3 MYH6 SOD2 NCEH1 ANKRD1 LBH MRPL42 TIMM17A TMEM65 CORIN TRIM72 IVNS1ABP CDK2AP1 GLG1 COL4A1 UCP1 ANXA2 COL4A2 BGN CENPA BTBD1 TNNI3 TUBA1B MRPL30 UACA S100A11	1	131	MYL2 MYL3 FABP3 COX7A1 CKMT2 HSPB6 NDUFB8 ACTN2 UQCR10 COX4I1 CRIP2 OXCT1 COX7C HRC ACO2 ACTC1 UQCRC1 UQCRC2 UQCRH NDUFA4 MYBPC3 COX5A MYL4 COX6B1 NDUFV1 COX5B GJA1 BAG3 NDUFA3 S100A1 NDUFV2 FHL2 UQCR11 CFD NDUFS7 CRYAB CKM DES ASB2 NDUFA1 NDUFA10 EEF1A2 COX17 OGDH NDUFA2 PDK4 IDH3G CTNNA1 VEGFB NDUFC1 HADHB SSPN NDUFA12 NDUFA6 CST3 MYOZ2 PKIA PNPLA2 GPX3 INPP5A DLST POPDC2 CIDEA NDUFA8 PPP1R3C M…	0
drug:P2847:hormone-dn	16984	257	221	31	TNNC1 ATP2A2 NPPA TCAP RPL3L GPC1 HK2 CSRP3 MYH6 NCEH1 SOD2 ANKRD1 TIMM17A MRPL42 LBH TMEM65 CORIN CDK2AP1 TRIM72 GLG1 IVNS1ABP COL4A1 UCP1 ANXA2 COL4A2 CENPA BTBD1 BGN TNNI3 UACA MRPL30	1	126	MYL2 MYL3 FABP3 COX7A1 CKMT2 HSPB6 NDUFB8 ACTN2 CRIP2 UQCR10 OXCT1 COX4I1 HRC COX7C ACO2 ACTC1 UQCRC2 UQCRC1 UQCRH MYL4 COX5A NDUFV1 MYBPC3 COX5B COX6B1 BAG3 S100A1 NDUFA3 GJA1 UQCR11 FHL2 NDUFV2 NDUFS7 CRYAB CKM DES CFD NDUFA4 ASB2 NDUFA10 COX17 EEF1A2 OGDH CTNNA1 NDUFA2 NDUFA1 NDUFC1 IDH3G VEGFB SSPN PDK4 NDUFA12 NDUFA6 MYOZ2 HADHB PKIA CST3 PNPLA2 INPP5A GPX3 DLST POPDC2 PRNP NDUFA8 CIDEA MGST…	0
drug:P2840:hormone-dn	16984	415	356	49	TNNC1 ATP2A2 NPPA TCAP RPL3L GPC1 HK2 CSRP3 SOD2 MYH6 ANKRD1 CDK2AP1 MRPL42 ACLY LBH NCEH1 TRIM72 HSPA9 TUBA1B CORIN TIMM17A TMEM65 UCP1 ATP6AP1 ACACA CENPA BGN FKBP4 PRPF19 POMP TNNI3 ANXA2 MRPL30 PPA1 COL4A1 SPTB MIF IVNS1ABP GLG1 MYBPHL ANKRD23 PDRG1 COL4A2 MORF4L2 MRPS17 EIF4EBP1 C3 GSPT1 TGM2	1	195	MYL2 MYL3 FABP3 COX7A1 CKMT2 HSPB6 NDUFA4 NDUFB8 UQCR10 FTH1 RPLP1 COX4I1 COX5B UQCRH UQCRC2 COX7C COX6B1 UQCR11 CHCHD10 COX5A ACTN2 NDUFV1 CRIP2 UQCRC1 UBB HRC ACTC1 NDUFA3 ACO2 MYBPC3 NDUFA6 BAG3 NDUFV2 ETFB S100A1 NDUFS7 RPS20 NDUFA10 RPS14 MYL4 RPL9 GJA1 CFD NDUFA2 FHL2 NDUFA1 CKM COX17 DES ASB2 CRYAB OXCT1 EEF1A2 CTNNA1 CST3 PNPLA2 OGDH PDK4 NDUFC1 ACADVL HADHB SSPN PPP1R3C MYOZ2 NDUFA7 IDH3…	0
drug:P2841:hormone-dn	16984	380	326	45	TNNC1 ATP2A2 TCAP NPPA RPL3L GPC1 HK2 CSRP3 MYH6 SOD2 ANKRD1 CDK2AP1 MRPL42 ACLY LBH TRIM72 CORIN UCP1 TMEM65 TUBA1B HSPA9 TIMM17A NCEH1 ACACA CENPA ATP6AP1 PRPF19 FKBP4 TNNI3 PPA1 GLG1 POMP ANXA2 BGN MRPL30 IVNS1ABP SPTB COL4A1 PDRG1 C3 ANKRD23 MYBPHL EIF4EBP1 MRPS17 COL4A2	1	177	MYL2 MYL3 FABP3 COX7A1 CKMT2 HSPB6 NDUFB8 NDUFA4 UQCR10 COX4I1 FTH1 RPLP1 UQCRH COX5B UQCRC2 ACTN2 COX6B1 NDUFV1 COX7C CRIP2 UQCR11 UQCRC1 COX5A CHCHD10 HRC ACTC1 MYBPC3 ACO2 CFD NDUFA3 NDUFV2 BAG3 S100A1 ETFB GJA1 NDUFA10 NDUFA6 NDUFS7 MYL4 UBB FHL2 NDUFA2 RPS14 CKM RPL9 RPS20 DES ASB2 COX17 EEF1A2 CRYAB NDUFA1 PNPLA2 OXCT1 OGDH ACADVL CTNNA1 HADHB CST3 PDK4 CIDEA PPP1R3C SSPN MYOZ2 NDUFC1 VEGFB…	0
drug:P2842:hormone-dn	16984	410	349	47	TNNC1 ATP2A2 RPL3L TCAP GPC1 CSRP3 NCEH1 NPPA MYH6 HK2 SOD2 LBH CDK2AP1 IVNS1ABP MRPL42 TRIM72 FKBP4 MIF TIMM17A CORIN TMEM65 ANKRD1 ATP6AP1 HSPA9 PRPF19 GLG1 CENPA SPTB POMP ANKRD23 SUDS3 ADK TNNI3 GSPT1 UACA MRPL30 PDRG1 PKP2 MRPS17 RABGGTB QRSL1 PSMA7 NSUN4 MFN1 TMEM201 BZW2 UBAP2	1	192	MYL2 MYL3 FABP3 CKMT2 HSPB6 COX7A1 NDUFA4 NDUFB8 UQCR10 RPLP1 COX4I1 ACTN2 UQCRC2 COX7C CRIP2 NDUFV1 HRC FTH1 UQCRH MYBPC3 UQCRC1 COX5B UQCR11 OXCT1 S100A1 BAG3 FHL2 NDUFA3 COX6B1 COX5A ACTC1 CHCHD10 NDUFV2 CKM NDUFA6 NDUFA2 UBB NDUFA10 NDUFS7 ETFB DES ASB2 EEF1A2 CRYAB RPS14 RPL9 ACO2 RPS20 CTNNA1 GJA1 OGDH PARK7 PKIA COX17 MYOZ2 VEGFB NDUFA12 RAB11B MGST3 POPDC2 NDUFC1 SSPN NDUFA8 NDUFA1 HERPUD…	0
drug:P2843:hormone-dn	16984	315	279	43	TNNC1 ATP2A2 RPL3L TCAP GPC1 NPPA CSRP3 NCEH1 MYH6 LBH CORIN ANKRD1 TRIM72 IVNS1ABP FKBP4 MRPL42 CDK2AP1 TMEM65 PRPF19 GLG1 TNNI3 CENPA MIF SPTB ATP6AP1 TIMM17A HK2 ADK ANKRD23 PKP2 UACA SUDS3 POMP PDRG1 MRPS17 QRSL1 BZW2 HAT1 PSMA7 E2F6 TMEM201 NSUN4 MFN1	1	145	MYL2 MYL3 FABP3 CKMT2 HSPB6 ACTN2 CRIP2 HRC MYBPC3 COX7A1 ACTC1 FHL2 OXCT1 UQCRC2 CKM BAG3 CRYAB DES S100A1 NDUFV1 ASB2 UQCRC1 EEF1A2 COX7C NDUFB8 NDUFV2 MYOZ2 CTNNA1 NDUFA4 NDUFA3 MYL4 PKIA COX4I1 NDUFA10 POPDC2 RPLP1 SSPN MGST3 NDUFA2 CLIP4 INPP5A NDUFA6 PFKM UQCR10 NDUFS7 VEGFB PARK7 TMOD1 HSPB7 CLU GJA1 OGDH MYOM1 RAB11B KLHDC2 SLC8A1 COX10 HERPUD1 UQCRH PRNP SPOP PLN HSPB8 NDUFA12 MAF1 RNF10…	0
drug:P2848:hormone-dn	16984	352	300	38	TNNC1 ATP2A2 NPPA RPL3L TCAP GPC1 SOD2 CSRP3 HK2 MYH6 MRPL42 HSPA9 NCEH1 ANKRD1 TIMM17A IVNS1ABP CORIN TRIM72 ACLY UCP1 TMEM65 MRPL30 PPA1 CDK2AP1 LBH FKBP4 ADK TNNI3 ACACA GSPT1 CENPA SPTB PRPF19 ANKRD23 NUDT4 BTBD1 MRPL50 RABGGTB	1	175	MYL2 MYL3 FABP3 COX7A1 CKMT2 HSPB6 NDUFA4 NDUFB8 UQCR10 COX5B UQCRC2 COX7C UQCRH COX5A COX4I1 COX6B1 UQCR11 CHCHD10 NDUFV1 UQCRC1 ACTN2 NDUFA6 ACO2 S100A1 OXCT1 HRC NDUFV2 NDUFA10 MYBPC3 NDUFA3 ACTC1 ETFB NDUFS7 NDUFA1 FHL2 NDUFA2 FTH1 CKM GJA1 NDUFC1 BAG3 CRYAB NDUFA12 CFD ACADVL IDH3G HADHB ASB2 COX17 EEF1A2 ACADM NDUFA8 ETFA PDK4 DES UBB VEGFB OGDH DLST CRIP2 PNPLA2 SLC25A5 NDUFS3 ECI1 CIDEA M…	0
drug:P2849:hormone-dn	16984	363	307	39	TNNC1 ATP2A2 RPL3L TCAP NPPA GPC1 SOD2 CSRP3 HK2 MYH6 MRPL42 HSPA9 NCEH1 ANKRD1 TIMM17A CORIN IVNS1ABP TRIM72 UCP1 LBH TMEM65 ACLY PPA1 MRPL30 CDK2AP1 MIF TNNI3 CENPA FKBP4 PRPF19 ACACA SPTB ADK ANKRD23 BTBD1 RABGGTB MRPL50 SBK1 QRSL1	1	177	MYL2 MYL3 FABP3 COX7A1 CKMT2 HSPB6 NDUFB8 NDUFA4 UQCR10 COX4I1 COX5B COX7C UQCRC2 UQCRH COX5A UQCR11 COX6B1 CHCHD10 NDUFV1 UQCRC1 ACTN2 ACO2 NDUFA6 NDUFV2 HRC NDUFA3 NDUFA10 ETFB S100A1 OXCT1 MYBPC3 ACTC1 NDUFS7 NDUFA1 NDUFA2 FHL2 CKM GJA1 FTH1 NDUFC1 COX17 ACADVL BAG3 HADHB NDUFA12 ASB2 CRYAB IDH3G EEF1A2 NDUFA8 ACADM CRIP2 OGDH DES ETFA DLST PDK4 VEGFB CIDEA NDUFS3 ECI1 MYOZ2 CFD NDUFS8 PNPLA2 …	0
drug:P3723:cerium|antibiotic|antioxidant|cephalosporin|beta-lactam antibiotic|cerium|cefaloridine|indicator-dn	16984	278	235	37	MIOX PAH HSPA5 DAO FMO1 KRT7 IGFBP7 ABCA2 ASS1 SLC34A3 KDR DAB2 SLC22A6 SLC22A1 ACP5 ENO1 OPLAH LACTB GGCT DIO1 ADK SERPINF2 DDAH1 HSP90B1 AMACR MIPEP DPYS CLN6 MCCC2 UAP1L1 LPGAT1 RIN2 SHMT2 BGN ETS1 MTHFD1 AHCY	1	131	ACSM2A ERRFI1 PC ACY3 AGXT2 APOM PYROXD2 PRSS8 PDZK1 ECHS1 G6PC SLC7A9 SLC37A4 RGN SOD3 AMN NAT8 QDPR DPP4 ACADM SLC3A1 BPHL GRHPR ALDOB SUCLG1 AKR7A2 PEPD PINK1 AKR1A1 KHK SOD1 TMLHE PXMP2 TNFAIP8 ACMSD SULT1C2 NDUFB4 NIT1 FUCA1 SLC26A1 NDUFA6 SCP2 GBA3 ACY1 NDUFB2 PTH1R TINAG DCXR SDHB SUCLG2 HPD PCK1 ACAT1 ARHGAP24 GSTA1 MRO GGT1 MSRA SLC25A5 DBI KIF1C NDUFV3 SGK1 IVD NDUFA1 ROGDI MDH1 ABHD14A…	0
drug:P2828:hormone-dn	16984	468	398	52	UCP1 NPPA ACLY ENO1 SOD2 ACACA CTSB HP HSPA9 TNNC1 ATP2A2 FMO1 MYBPHL PYGL HK2 GRINA MYH6 TCAP HSPD1 ANKRD1 PPA1 CSRP3 SLC24A3 MRPL42 YWHAG SFXN1 GSPT1 ARL6IP1 TMEM65 BPIFA1 TIMM17A TUBA1B APOC1 CORIN SLC25A19 ATAD3A C3 MRPS30 YWHAB ATP6AP1 TNNI3 NNMT CHORDC1 CCT6A S100A11 KNG1 RABGGTB MLXIPL IVNS1ABP NUDT4 SBK1 TFRC	1	215	CFD MYL4 FTH1 NDUFA4 IFI27 CHCHD10 CIDEA UQCRH NDUFB8 UQCR10 RPLP1 COX7A1 COX4I1 COX5B COX6B1 ACADM UQCRC2 UQCR11 ACO2 PNPLA2 COX5A COX6A1 ETFB UBB COX8A HADHB ETFA ACTC1 NDUFA1 RPL9 SLC25A5 PDK4 RGCC NDUFA6 GPD1 NDUFV2 COX7C GPX3 ACADVL COX17 RPS14 NDUFV1 IDH3G LETMD1 CKMT2 UQCRC1 TMBIM6 CDO1 NDUFS7 RPS20 NDUFS3 CST3 FABP3 GMPR UQCRB ECI1 ACSL5 DLST NDUFA10 ALDH2 ALAS1 NDUFS8 HSD17B4 GJA1 RPL27 …	0
drug:P2829:hormone-up	16984	425	370	50	ACLY TNNI2 ATP2A1 BGN S100A11 ANXA2 ACACA SOD2 HK2 CTSB APOC1 ELN C3 TGM2 NPM1 IFITM3 CDK2AP1 MRPL30 SPARC MIF COL4A1 AEBP1 LOXL1 TNFRSF12A COL4A2 TIMM17A HSP90B1 TNNT1 UCP1 HSPH1 PPA1 TMEM79 PSMA4 POMP COL1A1 PLS3 ITGBL1 PFDN2 FKBP4 MRPL17 GRINA CYB5B MORF4L2 GNS MLXIPL MYH4 HMGN1 HILPDA STIP1 OLFML2B	1	198	FTH1 COX8A UQCR10 CIDEA COX6A1 COX5B NDUFA1 NDUFA4 NDUFB8 IFI27 COX7A1 COX6B1 RPS20 COX5A CHCHD10 RPLP1 UQCR11 UBB UQCRH COX4I1 PDK4 COX7C CST3 ACO2 NDUFA3 DUSP1 NDUFA2 COX17 CFD ACSL5 RPS14 CDO1 HIGD2A SOD1 ACTA2 PNPLA2 NDUFA6 UBC MYL6 RPL9 ETFB NDUFS7 RPS27L HADHB DBI PVALB ALDH2 UQCRB NDUFA7 GADD45G ETFA TOMM7 MYH11 TNNT3 HSPB6 MYL2 WBP2 NDUFA12 IDH3G CSRP2 AGPAT2 GABARAP BAG3 RPL37A ANAPC13 I…	0
drug:P2826:hormone-dn	16984	382	328	48	ACLY UCP1 ACACA ENO1 HK2 ATP2A2 SOD2 CTSB HP PYGL ANXA2 HSPA9 APOC1 NPPA PPA1 C3 SLC24A3 BGN S100A11 SNX10 YWHAG TNNC1 EIF4EBP1 BPIFA1 SPARC FMO1 TUBA1B MRAP TCAP MYBPHL COL4A1 SLC1A3 ANKRD1 FASN YWHAB MRPL42 SMOC1 GPX8 TMEM65 PGM2 MYH6 ELN LOXL1 NNMT SLC25A19 COL4A2 HSD3B7 CSRP3	1	178	CFD CIDEA IFI27 FTH1 COX7A1 PNPLA2 PDK4 CHCHD10 COX5B NDUFA4 HADHB NDUFB8 UQCRH UQCR10 COX6B1 ACO2 COX4I1 COX5A COX8A UQCRC2 UQCR11 COX6A1 MYL4 ACADVL ELOVL6 CAV1 ACSL5 RPLP1 UBB NDUFA1 CDO1 FABP3 GPD1 ETFB GJA1 PLIN4 ETFA CST3 IDH3G ACADM UQCRC1 COX17 ACTA2 NDUFV1 COX7C RGCC PRELP AGPAT2 LETMD1 CIDEC NDUFS7 NDUFA6 UQCRB ECI1 AOC3 NDUFV2 RPL9 RPS20 RPS14 NDUFA10 ACSL1 PPP1R3C NDUFS3 ECHS1 DLST AD…	0
drug:P2827:hormone-dn	16984	350	300	47	UCP1 ACLY ACACA ENO1 HK2 ATP2A2 HP SOD2 PYGL CTSB APOC1 PPA1 ANXA2 NPPA C3 SLC24A3 HSPA9 SNX10 BGN TNNC1 YWHAG EIF4EBP1 S100A11 SPARC MRAP TCAP MYBPHL SLC1A3 COL4A1 MRPL42 TUBA1B FMO1 ANKRD1 FASN GPX8 HSD3B7 SLC25A19 TMEM65 SMOC1 LOXL1 NNMT MYH6 ELN PGM2 BPIFA1 CSRP3 NRP1	1	156	CFD CIDEA IFI27 COX7A1 PNPLA2 PDK4 FTH1 CHCHD10 HADHB ACO2 COX6B1 NDUFB8 COX5B UQCRH MYL4 NDUFA4 UQCR10 COX4I1 COX5A ACADVL CAV1 UQCR11 UQCRC2 COX6A1 ELOVL6 CDO1 FABP3 COX8A ACSL5 GPD1 ETFB GJA1 PLIN4 NDUFA1 IDH3G NDUFV1 UQCRC1 COX17 RGCC CST3 ETFA LETMD1 CIDEC RPLP1 PRELP ECI1 AGPAT2 ACADM AOC3 ACTA2 NDUFS7 NDUFV2 COX7C NDUFA10 NDUFA6 ECHS1 UBB ADIPOR2 PPP1R3C DLST ACSL1 NDUFS3 UQCRB ATP1A2 RPL9…	0
drug:P2824:hormone|N-benzyladenine-dn	16984	374	312	44	ACLY UCP1 ACACA ENO1 SOD2 ATP2A2 HSPA9 FMO1 APOC1 PYGL PPA1 NPPA CTSB HK2 HP SLC24A3 BPIFA1 CYB5B HSPD1 SFXN1 YWHAG C3 COL4A1 MLXIPL MYBPHL MRAP NRP1 MRPL42 TNNC1 MRPL50 FASN SLC25A19 NUDT4 TIMM17A YWHAB EIF4EBP1 MYH6 COL4A2 MRPL30 SNX10 TMEM79 TGM2 ANKRD1 ELN	1	174	CFD CIDEA IFI27 CHCHD10 COX7A1 NDUFB8 PNPLA2 COX6A1 HADHB COX8A COX6B1 NDUFA4 ACO2 COX5B UQCRH UQCRC2 PDK4 UQCR10 COX5A UQCR11 ACADVL COX4I1 ACADM CDO1 NDUFA1 ELOVL6 ETFA ETFB ACSL5 GPD1 MYL4 CAV1 COX7C IDH3G COX17 UQCRC1 FABP3 NDUFV1 FTH1 LETMD1 ECI1 ECHS1 DLST NDUFA6 AGPAT2 NDUFA10 UQCRB NDUFV2 CIDEC ACTA2 ACSL1 CHPT1 NDUFS7 NDUFS3 SLC25A5 ME1 ABCD3 AOC3 PLIN4 CPT2 RGCC S100A1 PRELP NDUFC1 NDUF…	0
drug:P2825:hormone-dn	16984	382	319	42	UCP1 ACLY ACACA SOD2 ENO1 ATP2A2 FMO1 HSPA9 APOC1 PPA1 NPPA PYGL HP CTSB BPIFA1 SLC24A3 HK2 SFXN1 CYB5B HSPD1 MRPL42 MRAP YWHAG MLXIPL MYBPHL COL4A1 TNNC1 TIMM17A MRPL50 EIF4EBP1 SNX10 NRP1 SLC25A19 FASN MRPL30 ANKRD1 SLC1A3 TGM2 COL4A2 YWHAB MYH6 COX19	1	177	CFD CIDEA IFI27 CHCHD10 COX7A1 COX6A1 COX8A COX6B1 NDUFB8 NDUFA4 PNPLA2 UQCRH COX5B HADHB UQCR10 ACO2 UQCRC2 COX5A PDK4 UQCR11 COX4I1 CDO1 NDUFA1 ACADVL ACADM ETFA ETFB ELOVL6 COX7C GPD1 IDH3G FTH1 MYL4 CAV1 FABP3 ACSL5 COX17 UQCRC1 NDUFA6 NDUFV1 ECI1 LETMD1 ECHS1 NDUFV2 NDUFA10 UQCRB AGPAT2 ACTA2 NDUFS3 DLST SLC25A5 CIDEC NDUFS7 CHPT1 S100A1 RGCC ACSL1 NDUFC1 CPT2 AOC3 ME1 SOD1 NDUFS8 ABCD3 CSRP…	0
drug:P2822:hormone-dn	16984	419	348	46	ACLY UCP1 ACACA SOD2 ENO1 ATP2A2 HSPA9 FMO1 CTSB PYGL APOC1 HP PPA1 NPPA HK2 SLC24A3 S100A11 HSPD1 CYB5B SFXN1 BPIFA1 YWHAG C3 MRPL42 MLXIPL MRAP MYBPHL COL4A1 TNNC1 TIMM17A EIF4EBP1 MRPL50 SLC25A19 FASN YWHAB TGM2 ANXA2 SNX10 NRP1 MRPL30 ANKRD1 MYH6 NUDT4 TMEM79 COX19 PSMA4	1	191	CFD CIDEA IFI27 CHCHD10 NDUFB8 NDUFA4 COX7A1 COX6A1 COX8A UQCRH UQCR10 COX5B COX6B1 COX4I1 PNPLA2 UQCR11 HADHB COX5A FTH1 ACO2 NDUFA1 UQCRC2 PDK4 ACADVL ACADM CDO1 COX7C ETFB ELOVL6 ETFA ACSL5 GPD1 MYL4 COX17 NDUFA6 IDH3G FABP3 CAV1 UQCRC1 NDUFV1 NDUFV2 UQCRB LETMD1 ECI1 SLC25A5 NDUFS7 AGPAT2 NDUFA10 ECHS1 ACTA2 DLST RPLP1 NDUFS3 NDUFA3 CHPT1 S100A1 SOD1 CIDEC ME1 ACSL1 RGCC NDUFC1 NDUFA2 PLIN4 A…	0
drug:P2823:hormone-dn	16984	396	335	45	ACLY UCP1 ACACA ENO1 SOD2 ATP2A2 HSPA9 FMO1 CTSB APOC1 HP PYGL PPA1 NPPA HK2 SLC24A3 HSPD1 BPIFA1 CYB5B SFXN1 YWHAG C3 MLXIPL MYBPHL MRAP SNX10 MRPL50 COL4A1 MRPL42 SLC25A19 S100A11 FASN YWHAB TGM2 ANXA2 NRP1 EIF4EBP1 TIMM17A TNNC1 NUDT4 ANKRD1 SLC1A3 MYH6 MRPL30 TMEM79	1	187	CFD CIDEA IFI27 CHCHD10 COX6A1 NDUFB8 COX8A NDUFA4 COX7A1 UQCRH COX6B1 PNPLA2 HADHB COX5B UQCR10 ACO2 COX4I1 UQCRC2 FTH1 PDK4 ACADM CDO1 COX5A ACADVL UQCR11 NDUFA1 ELOVL6 ETFA ETFB ACSL5 GPD1 MYL4 IDH3G COX7C CAV1 COX17 FABP3 NDUFV1 UQCRC1 LETMD1 NDUFA6 ACTA2 ECI1 AGPAT2 SLC25A5 ECHS1 NDUFV2 NDUFA10 UQCRB DLST CHPT1 CIDEC NDUFS3 ACSL1 S100A1 ME1 AOC3 ABCD3 NDUFS7 RGCC CPT2 PRELP CSRP2 SOD1 AHCYL1…	0
drug:P4875:aflatoxin B1|mycotoxin|dimethyl sulfoxide-dn	16984	382	347	50	SAA1 MAT1A ASGR1 APOC1 NNMT RPL22L1 AGT APOE SPON2 CPB2 TUBA1B BAAT C3 S100A2 F12 GRN AHSG AQP9 BAMBI C4BPA UGT2B4 DHCR7 FGL1 AMOTL2 C4B GLDC CLDN14 GPI REPS1 F2 GGH RDH16 CLTC CFHR1 EBPL ANKK1 RFTN1 MIF PRG4 COL18A1 MRPL15 EFNA1 PPP1R35 KPNA2 REPIN1 CP PLS3 HNRNPF LACTB2 USP9X	1	187	FABP1 APOC3 ALDOB TM4SF4 LEAP2 APOA1 ADH1C HSD17B6 CYB5A ALDH1A1 ACTB GSN RPLP2 RPS15 CYP3A4 ETFB ANG DBI VAMP8 COX5B MPST RPS6 UBB ACSL1 AKR1C3 HERPUD1 NUPR1 RPL37A MAOA RPS14 FAU UBC REEP6 RPL13 FGA PEPD COX14 GSTA2 GSTO1 FTH1 RPL27 GLYATL1 SAT2 NDUFA4 ECI1 ACSM2A RARRES2 RPL18 DCXR KLF9 RABAC1 PHB2 GBA3 ADH4 RPS11 MRPL41 SPINK1 ECHS1 ZNHIT1 POLD4 TMEM59 PSMB6 RPL10A YIF1A PNRC1 ACAA1 VPS28 NFK…	0
drug:P4878:aflatoxin B1|mycotoxin|dimethyl sulfoxide-dn	16984	438	375	53	S100A2 MAT1A NNMT RPL22L1 GRN GPI AGT TM4SF1 CD70 ASGR1 CPB2 ANKK1 CLTC BAMBI DHCR7 LAMB1 PDIA4 C1QBP C4B ACTL8 FN1 PPP1R35 BAAT NCOR2 BST2 GLDC IGFBP7 AQP9 KPNA2 IFITM5 RDH16 AMOTL2 COL18A1 ALPP TIMP1 ILF2 CHI3L1 USP9X RFTN1 PLS3 HNRNPF BIRC5 EFNA1 VCX MRPL15 TUBA1B SLC39A8 PTTG1 REPS1 ABLIM2 IL13RA2 HMGB2 CD24	1	189	ACTB GSN AKR1B10 RPL27 RPS15 ALDH1A1 AKR1C3 APOA1 HSD17B6 GSTA2 APOC3 RPS6 RPL10A ADH1C COX5B RPL13 RPL3 RPL18 FGA ETFB NDUFA4 FABP1 MAOA GSTA5 RPL37A ALDOB FTH1 COX7C CYB5A POLD4 RPLP2 PRDX6 TTR TOMM7 RPL29 CAV1 COX8A ACSL1 VAMP8 PGM1 RPLP1 DBI SDF4 SPINK1 MRPL41 PALLD ZNHIT1 ADH4 GSTO1 COX14 YIF1A GSTA1 RARRES2 ACY1 RPL36 NUPR1 RPS11 RPS25 LEAP2 EDF1 GBA3 TMEM59 ECI1 NDUFA1 UBL5 KLF9 SOD3 FAU M…	0
drug:P2319:corticotropin|dexamethasone-up	16984	438	356	45	FASN APOE CALB1 AQP2 IGFBP1 CDH16 ENO1 PLAU TUBA1B ASS1 FMO1 ACP5 GNS DAO ACLY SPP1 TRAP1 MIF AGT RBP4 UCP1 G6PD DHCR7 C1QBP C4B TUBA1C AHCY CTSB ANXA2 TUBA1A GRINA HSPA1B OPLAH SREBF1 EIF3B ATP6AP1 YWHAG PAH RNASEH2A TMEM79 GRN EIF4EBP1 RPN2 AIMP2 CLPB	1	195	DNASE1 GPX3 HBA2 TSPO COX4I1 SULT1A1 SLC25A1 EEF2 SOD3 UBA52 PCK1 FABP4 ALDOB COX5B NDUFS7 CKB ATP6V0C COX8A HBB CRYAB GPD1 PEBP1 RPLP2 GPX4 DBI COX7A2 RPS29 IDH3G GAMT HSD11B2 NDUFB2 UQCR11 SLC25A3 CKMT1B MAP1LC3A FTH1 SDHA S100A1 UBC FABP3 FAU GSTM1 GABARAP CAPNS1 NDRG2 HADHB OAZ1 CIDEA TXN2 CRIP2 NDUFB9 UBB GSTA5 PRDX2 TMBIM6 HPN RPL18 SUCLG1 BCKDHA CPT2 G6PC CLCNKA NDUFB4 BCKDHB DGAT1 PDK2 CO…	0
drug:P4449:oxygen atom|2-butoxyethanol-dn	16984	455	334	47	PYGL SERPINA6 HSD3B7 CYP1A2 ABCB11 HAL FASN SREBF1 PROC NIT2 GLS2 ELOVL2 KNG1 COL18A1 PHLDA1 LIPC MLXIPL IFITM3 LACTB2 ASGR1 TUBA1B RPL22L1 APOC1 C1QBP KRT18 PAICS SERPINF2 MREG HSP90AB1 SCO2 CYB5B RGS16 CRP F12 APOF HSPA1B SLC38A4 PLS3 PGK1 LAMP2 CREG1 F5 CHDH HSPD1 UROC1 RPL7 BHLHE40	1	193	INMT SLC2A2 PIGR NRN1 RPL31 QDPR GSTA3 STARD10 HERPUD1 RPL27A ACSL5 GABARAPL1 TTC36 RGN C8G REEP6 MARC2 RPS11 SEC14L2 TLCD2 UBA52 KLKB1 HAAO RPL23A SDHB ANGPTL3 ABHD14B RPL3 LGALS9 KHK EIF4A2 RNF125 SELENBP1 COX4I1 PCYT2 RPS27A TMPRSS6 NDUFA4 RPL4 ACTB RPS15 FTH1 PGRMC1 CISD1 GSTM1 RPL10 HEBP1 UQCRB OSGIN1 ALAD COX6B1 RPL36 APOC3 KXD1 PDCD4 FBP1 DBI RPS8 VKORC1 NDUFA1 RPL13 CYB5A UGP2 UQCRC1 AADA…	0
drug:P655:zinc oxide|nanoparticle-dn	16984	527	386	71	APOE APOA2 APOC1 RBP4 AHSG AHCY APOH PAH C3 SLC38A4 HAMP HSPA5 C9 MAT1A HAL FMO1 GLS2 IFITM3 HSP90B1 ABCB11 S100A10 MARC1 MIF HSP90AB1 POMT2 PGK1 LRRC61 ELOVL2 LIPC HSP90AA1 CYP1A2 HSPD1 F12 ITIH2 LAMP2 FPGS PDIA3 SLC22A1 PYGL IGF1 SERPINF2 PROC AQP9 HSPA9 FN1 CYB5B TRAM1 DPYS NUDT4 POMP BAAT DDAH1 SOD2 EBPL TRAP1 CPN1 APOF CANX SREBF1 ARL6IP1 GLDC CYP7B1 CAPRIN1 PGM2 MTHFD1 CFHR1 ACLY CLDN1 SLC2…	1	198	TTR EEF1A1 GNMT APOC3 APOA1 HPD ALDH1A1 CAT PHYH GSTM1 INMT GSTA3 ALDOB BHMT2 ALDH2 FABP1 HACL1 NDRG2 ACOX1 NDUFA4 RPL10 CROT CYB5A PIGR B2M MDH1 ACSL1 GSTK1 PGRMC1 ALDH1L1 CHCHD2 SCP2 G6PC EPHX1 RGN TTC36 HGD APOB TPT1 ADIPOR2 SOD1 FBP1 INSIG1 OAT UBA52 KHK GSTA4 ACADM METTL7B GCDH SLC2A2 REEP6 RNF125 C8G CYP27A1 ABCD3 ETFDH GOT1 HADH HSD17B6 CNBP HAAO CTH COX5B PECR CIDEB UGT2A3 AASS ACAT1 AKR1…	0
drug:P5786:dimethyl sulfoxide-up	16984	303	255	29	MIOX LAMP2 LACTB2 HSPD1 SERPINE2 ASGR1 MOSPD2 MARC1 SHMT2 CHUK TGM2 FER1L5 SNRPG PSMA1 G6PD DHCR7 ENO1 SLC25A13 DNAJA1 BCAP31 MOSPD1 SLC16A6 GLRX3 M6PR PLOD1 NBN PSMA4 TXNDC12 F2	1	146	FABP1 ACOX1 EHHADH PCTP ECI2 RETSAT HADHB ADTRP ALDH1A1 NUDT7 HACL1 DECR1 ACADM ACOT2 CIDEA EPHX2 HSD17B4 HSDL2 CAT MRPS18A CREB3L3 AQP7 FBP1 CD36 ABCD3 ACADL ETFB SLC25A20 TMEM14C TXNIP FABP3 ACADVL DBI VNN1 MTTP HMOX1 AGMO ACAT1 CPT2 CHCHD2 GDE1 OAT PODN CMBL CHCHD10 PPCS SAR1B GSTA4 CRAT PDK4 MOCS2 SLC25A4 ACADS ACO1 MSMO1 LPCAT3 ETFDH ME1 SUCLG1 RAB30 SUCLG2 MLYCD HIBCH PNPLA2 GPD1 ETFA INSIG…	0
drug:P5787:dimethyl sulfoxide-up	16984	270	227	25	MIOX LACTB2 HSPD1 PSMA1 MOSPD2 SERPINE2 MARC1 ABCB11 ASGR1 G6PD DNAJA1 PSMA4 SNRPG CHUK BCAP31 PSMA7 SRP9 PSMB2 NBN TGM2 PSAT1 LAMP2 M6PR GJB2 TMEM33	1	129	FABP1 ACOX1 EHHADH PCTP ECI2 RETSAT ACOT2 HADHB ADTRP ALDH1A1 HSDL2 ACADM DECR1 HACL1 NUDT7 EPHX2 CIDEA VNN1 CD36 TXNIP FBP1 GDE1 CREB3L3 ABCD3 CAT TMEM14C HSD17B4 SLC25A20 PPCS CPT2 ACADL SAR1B MOCS2 SLC25A4 ETFB ACO1 ACADVL PDK4 MRPS18A GSTA4 CMBL FABP3 ACAT1 OAT CRAT GLRX GSTA5 PEX11A HIBCH CHCHD2 LPCAT3 DBI GPD1 AQP7 SUCLG1 GSTA3 CHPT1 MTTP CHCHD10 ACOT12 HMOX1 PNPLA2 MLYCD ETFA ETFDH PODN RA…	0
drug:P5784:dimethyl sulfoxide-up	16984	348	279	33	APOA2 APOC1 AGT MOSPD2 MARC1 LACTB2 PSMA1 ASGR1 CHUK FGL1 SHMT2 MIOX ENO1 SRP9 LAMP2 ABCB11 TGM2 HSPD1 ISG15 HSPA5 POMP SERPINA6 FER1L5 SERPINE2 LIPC PSMA4 DNAJA1 BCAP31 PGK1 SNRPG GJB2 SLC25A13 TYSND1	1	153	ACOX1 FABP1 PCTP ECI2 EHHADH HACL1 TXNIP HADHB ADTRP NUDT7 RETSAT HSD17B4 FBP1 DECR1 EPHX2 HSDL2 ETFB CREB3L3 ACOT2 CAT ABCD3 ACADM CIDEA ALDH1A1 PPCS TMEM14C SLC25A20 SAR1B MTTP DBI MOCS2 GPD1 ACAT1 ACADVL CHCHD2 HSD17B6 CPT2 PHYH GDE1 CISD3 CHCHD10 CISD1 PDK4 CMBL EEF1B2 ACADL MRPS18A GLRX5 AGMO PODN PLIN2 ACO1 HIBCH LIPA GSTK1 PNPLA2 MLYCD PEX11A GALE TMEM120A SPINK1 GLRX ETFDH UQCRB DAD1 CRAT…	0
drug:P5785:dimethyl sulfoxide-up	16984	332	267	38	APOA2 APOC1 HSPA5 MOSPD2 AGT PSMA1 MARC1 ABCB11 LACTB2 CHUK ASGR1 FGL1 SRP9 HSPD1 LAMP2 DNAJA1 SERPINA6 MIOX LIPC PSMA7 PSMB2 MAGOH GJB2 POMP EIF1AD PSMA4 TGM2 ISG15 AASDHPPT RPL22L1 TXNDC12 SERPINE2 BST2 C9 SNRPG BCAP31 CHORDC1 NBN	1	139	ACOX1 ECI2 PCTP FABP1 TXNIP HADHB EHHADH HACL1 ADTRP RETSAT HSDL2 FBP1 DECR1 NUDT7 ACOT2 ABCD3 GDE1 PPCS ACADM EPHX2 SAR1B HSD17B4 MOCS2 ETFB CAT PDK4 CREB3L3 ALDH1A1 SLC25A20 TMEM14C DBI CHCHD2 CPT2 CIDEA GPD1 ACAT1 CHCHD10 ACO1 ACADVL PEX11A GLRX NDUFA4 CMBL GSTK1 PLIN2 CISD1 SPINK1 HIBCH PNPLA2 ACOT12 MTTP EEF1B2 PDHB VNN1 HSD17B6 NOP10 MLYCD ETFDH PHYH OCIAD1 GLRX5 GALE UQCRH COX14 CRAT LIPA …	0
drug:P5770:dimethyl sulfoxide|diisononyl phthalate-up	16984	441	343	24	F2 SHMT2 APOA2 MIF AGT RBP4 LAMP2 ENO1 ASGR1 POMP MARC1 PSMA1 SEC61G HP SERPINE1 LACTB2 GJB2 APOH BCAP31 MIOX PLG SLC25A13 AHCY CTSB	1	222	ACOX1 DECR1 ALDH1A1 DBI EPHX1 FABP1 CHCHD10 GSTA5 FBP1 STARD10 HACL1 ADTRP RETSAT ABCD3 HADHB CHPT1 EPHX2 CMBL MGST3 CREB3L3 FAU COX7A2 PHYH PCTP HSD17B4 UQCR10 ETFB CIDEA AKR7A3 RARRES2 UBA52 COX7B EHHADH ECI2 CAT TMEM14C GSTA4 CHCHD2 HSD17B11 BHMT NDUFC1 UQCRQ GPD1 HSDL2 SLC25A20 IFI27 GDE1 HPD UQCRB ACSM1 NDUFB9 SAR1B GLRX5 SLC22A18 PODN NDUFB11 ACO2 GPT NUDT7 AGMO ACADM CISD3 NDUFA4 NDUFA3 P4…	0
drug:P5783:dimethyl sulfoxide-up	16984	209	182	18	S100A11 UBD HSPD1 MIOX LACTB2 SERPINE2 MARC1 MOSPD2 PSMA1 DNAJA1 SNRPG PSAT1 PSMA4 TGM2 G6PD ABCB11 GJB2 EBPL	1	104	FABP1 ACOX1 EHHADH ECI2 RETSAT PCTP ALDH1A1 HADHB ADTRP ACOT2 DECR1 HSDL2 CD36 ACADM VNN1 SLC25A4 CIDEA NUDT7 HACL1 EPHX2 ACADL TXNIP CREB3L3 GDE1 ABCD3 FBP1 GSTA4 CAT HSD17B4 CPT2 TMEM14C SLC25A20 GSTA3 MRPS18A CMBL GLRX ACO1 PDK4 FABP3 MOCS2 HMOX1 ALDH3A2 ACADVL CRAT PPCS ACAT1 LPCAT3 EPHX1 ETFB CHCHD10 OAT HIBCH PEX11A AQP7 RAB30 SUCLG1 SAR1B GPD1 ACOT12 PNPLA2 PCYOX1 INSIG1 ETFDH GSTA5 CHPT1 …	0
drug:P5780:dimethyl sulfoxide-up	16984	302	251	23	LACTB2 HSPD1 MARC1 MOSPD2 MIOX PSMA1 TGM2 ASGR1 CHUK SERPINE2 SNRPG GLRX3 DNAJA1 LAMP2 SRP9 TXNDC12 GJB2 MOSPD1 PSMA4 NBN ENO1 IGF1 ABCB11	1	140	ACOX1 FABP1 ECI2 PCTP EHHADH HACL1 TXNIP ADTRP HADHB RETSAT NUDT7 DECR1 HSD17B4 FBP1 ALDH1A1 CREB3L3 EPHX2 HSDL2 CIDEA CAT ACADM ABCD3 ACOT2 ACADL ETFB SLC25A20 TMEM14C CHCHD10 GPD1 ALDH3A2 MOCS2 PPCS ACAT1 CPT2 GDE1 ACADVL CMBL MTTP MRPS18A PDK4 SAR1B GLRX CHCHD2 AGMO HSD17B6 CISD3 TPRG1L GLRX5 EPHX1 GALE CISD1 CD36 HIBCH ETFDH TMEM120A PNPLA2 PODN LIPA PEX11A CRAT ACO1 PLIN2 VNN1 MLYCD PHYH UQC…	0
drug:P5781:dimethyl sulfoxide-up	16984	280	238	27	HSPD1 LACTB2 MOSPD2 PSMA1 MARC1 HSPA5 MIOX DNAJA1 ABCB11 TXNDC12 TGM2 CHUK SNRPG SERPINE2 GJB2 ASGR1 PSMB2 GLRX3 PSMA4 RAN MAGOH SRP9 EIF1AD NBN LAMP2 TOMM20 PSAT1	1	126	ACOX1 ECI2 PCTP FABP1 TXNIP EHHADH HADHB ADTRP RETSAT DECR1 HACL1 HSDL2 NUDT7 FBP1 GDE1 ACOT2 ACADM EPHX2 ABCD3 ALDH1A1 HSD17B4 CREB3L3 CIDEA MOCS2 PPCS PDK4 CAT CHCHD10 ACADL ETFB SLC25A20 SAR1B CPT2 GLRX ALDH3A2 VNN1 GPD1 TMEM14C ACAT1 CHCHD2 CD36 CMBL ACO1 PEX11A ACADVL ACOT12 PNPLA2 HIBCH PLIN2 SLC25A4 UQCR10 EPHX1 ETFDH LPCAT3 GALE CISD1 CRAT MLYCD RAB30 MTTP COX7A2 ACO2 OCIAD1 GK MRPS18A GL…	0
drug:P2800:hormone-up	16984	295	248	33	ACLY UCP1 ACACA NPPA BPIFA1 ENO1 ATP2A2 SOD2 APOC1 PPA1 FMO1 MYBPHL SLC24A3 CYB5B HSPA9 PYGL NRP1 MRAP HP HSPD1 SFXN1 COL4A1 TGM2 MYH6 ELN C3 COL4A2 FASN EIF4EBP1 ANKRD1 TMEM79 MLXIPL GPX8	1	141	CIDEA CFD IFI27 MYL4 ELOVL6 CDO1 COX6A1 PNPLA2 COX8A HADHB ACADVL ACTA2 COX6B1 AGPAT2 NDUFA1 ACO2 ACADM COX7A1 CHPT1 CAV1 LETMD1 GPD1 ETFA CIDEC ACSL5 ETFB DLST ECHS1 ECI1 UQCRH S100A1 ACSL1 UQCRC2 SOD1 CPT2 AOC3 PDK4 MYH11 ABCD3 FABP3 CSRP2 IDH3G ME1 NDUFB8 COX17 MYLK UQCRC1 NDUFA10 AHCYL1 SLC25A5 BPIFB1 ALDH6A1 COX5A ACTC1 NDUFA12 NDUFA4 GSTO1 UQCR11 PLIN4 BCKDHA COX4I1 NDUFA6 NDUFV2 PRELP HSD1…	0
drug:P2801:hormone-up	16984	378	320	37	ACLY UCP1 ACACA SOD2 ENO1 APOC1 PPA1 CTSB FMO1 HSPA9 C3 PYGL HK2 HP SLC24A3 COL4A1 TGM2 ELN CYB5B SFXN1 COL4A2 YWHAG MRAP HSPD1 EIF4EBP1 MRPL30 NRP1 SLC25A19 SNX10 YWHAB TMEM79 PLS3 MLXIPL HSP90B1 TIMM17A PSMA4 ANXA2	1	183	CIDEA CFD IFI27 COX8A COX6A1 COX6B1 NDUFB8 NDUFA4 COX5B COX7A1 UQCR10 PNPLA2 FTH1 NDUFA1 ACO2 CHCHD10 UQCRH COX4I1 HADHB CDO1 PDK4 UQCR11 COX5A ETFB ETFA ACADM ACADVL COX7C CAV1 COX17 ACTA2 IDH3G NDUFA6 ELOVL6 UQCRC2 GPD1 NDUFV1 UQCRB SOD1 ECI1 UQCRC1 ACSL5 CSRP2 AOC3 CIDEC ECHS1 CHPT1 NDUFA10 RGCC S100A1 DBI NDUFA3 NDUFS7 AGPAT2 NDUFA2 UBC PLIN4 NDUFV2 SLC25A5 DLST NDUFB3 LETMD1 MYH11 HIGD2A GAD…	0
drug:P2802:hormone-up	16984	397	337	43	TNNC1 NPPA ATP2A2 SOD2 GPC1 MYH6 ACLY CSRP3 RPL3L ANKRD1 HK2 NCEH1 MYBPHL TCAP HSPA9 MRPL42 CORIN FKBP4 LBH TIMM17A TRIM72 IVNS1ABP UCP1 TGM2 ACACA GLG1 COL4A1 CDK2AP1 PRPF19 MRPL30 COL4A2 TNNI3 POMP GSPT1 TMEM65 ADK MIF NRP1 PDRG1 F2R NSUN4 PKP2 TNFAIP1	1	196	MYL2 MYL3 FABP3 COX7A1 CKMT2 MYL4 NDUFA4 NDUFB8 UQCR10 UQCRH UQCRC2 COX5B COX4I1 CRIP2 COX6B1 UQCR11 CHCHD10 COX7C ACTC1 UQCRC1 NDUFV1 COX5A ETFB NDUFA10 S100A1 MYBPC3 RPLP1 FTH1 NDUFV2 OXCT1 NDUFA3 HSPB6 NDUFA6 ACO2 HRC ACTN2 NDUFA2 BAG3 NDUFS7 FHL2 NDUFA1 CTNNA1 COX17 CLU CFD GJA1 NDUFC1 NDUFA12 SSPN VEGFB DLST ACADVL EEF1A2 OGDH IDH3G ETFA ACADM CIDEA HADHB INPP5A HIGD2A NDUFS8 PNPLA2 POPDC2 D…	0
drug:P2803:hormone-up	16984	387	328	42	TNNC1 ATP2A2 SOD2 MYH6 NPPA NCEH1 CSRP3 RPL3L HK2 GPC1 ANKRD1 HSPA9 LBH TIMM17A MRPL42 IVNS1ABP CORIN TCAP FKBP4 TGM2 PRPF19 TRIM72 CDK2AP1 MRPL30 GLG1 ADK TNNI3 COL4A2 POMP PKP2 PDRG1 COL4A1 TMEM65 MRPS17 GSPT1 QRSL1 RABGGTB NSUN4 MOV10L1 MIF TNFAIP1 NRP1	1	186	MYL3 MYL2 FABP3 CKMT2 COX7A1 NDUFB8 UQCR10 COX4I1 NDUFA4 UQCRH UQCRC2 CRIP2 S100A1 ACTC1 UQCRC1 UQCR11 COX7C MYBPC3 COX6B1 NDUFV1 COX5B FHL2 ETFB COX5A CHCHD10 OXCT1 NDUFA6 NDUFA10 NDUFV2 BAG3 NDUFA2 NDUFA3 NDUFA1 HSPB6 HRC ACO2 FTH1 CTNNA1 ACTN2 NDUFS7 ACADVL GJA1 COX17 NDUFC1 OGDH HADHB RPLP1 NDUFA12 MYOZ2 ETFA POPDC2 SSPN VEGFB EEF1A2 CLU ACADM DLST NDUFA7 DES NDUFS8 SLC25A5 HSPB7 CD81 COX10 N…	0
drug:P2808:hormone-dn	16984	334	263	39	MIOX ASS1 CDH16 SLC22A6 SLC22A1 CLDN2 CYP7B1 NUDT19 FMO1 SLC22A12 DAO DDAH1 NCEH1 GRB7 NOX4 SFXN1 CYB5B MIF SOD2 CYP24A1 SERPINF2 ARL6IP1 PAH GLDC LAMP2 MACROD2 PROC MFSD1 LLGL2 HSPD1 PLAU NXT2 PLSCR2 HOXB7 SLC6A6 LRRC8D ENO1 SUCNR1 MOGAT1	1	141	CYP4B1 ACY3 PDZK1 DNASE1 ALDOB INMT GLYAT BDH2 KHK GUCA2B G6PC NAT8 COX6A1 FBP1 CHPT1 NDRG1 SELENBP1 COX8A CDHR5 AMN TMBIM4 ABHD14B TTC36 OXCT1 COX7C LRPAP1 AKR1A1 NDUFA1 HINT2 SOD1 PRDX5 CRYL1 MEP1A S100A1 UQCR11 BHMT2 ACADM NR1H4 GSTZ1 COX6B1 CIDEB NDUFA4 NDUFB8 HIGD2A UQCR10 UQCRH GABARAPL1 LDHD GRHPR RPS27L ALDH6A1 NDUFA12 F13B HINT1 SLC12A1 ABCD3 ISCU PRSS8 TMPRSS2 TIMM8B CCS TCN2 SLC9A3R1 S…	0
drug:P5767:dimethyl sulfoxide|diisononyl phthalate-up	16984	454	367	30	S100A11 F2 MIF SHMT2 UBD ENO1 CRP RBP4 PSMA1 VMP1 NIT2 MARC1 AHCY DHCR7 HSPD1 POMP LACTB2 NDUFA4L2 C1QBP GLRX3 GJB2 MIOX ASGR1 HSD3B7 KRT18 PSMB2 SEC61G NEURL3 SERPINE2 RAN	1	231	EPHX1 CHCHD10 ACOX1 ALDH1A1 DECR1 GSTA5 AKR7A3 MGST3 CIDEA FBP1 ADTRP CHPT1 FABP1 HSD17B11 STARD10 GDE1 SELENBP1 RETSAT HADHB TMEM14C EPHX2 HACL1 CREB3L3 GSTA4 CMBL ABCD3 CAT RARRES2 ECI2 COX7A2 HSD17B4 ACADL EHHADH NDUFB11 HPD RPS29 CHCHD2 DBI FAU SLC25A4 ATP6V0C AKR1A1 PCTP GLRX5 NDUFB9 PIGR ETFB PGRMC1 GPD1 CYB5A ACO2 COX7B UQCRB ACSM1 HSDL2 UQCRQ RPS5 CST3 NDUFC1 SLC25A20 PECR COX6A1 HMOX1 VN…	0
drug:P4334:conjugated linoleic acid-dn	16984	496	427	60	MUCL1 YWHAG SH3KBP1 PIP IFITM3 DPYSL2 KRT14 EPS8 SPARC PPA1 IFITM1 COL4A1 PMEPA1 PTGES3 BCAP31 PLS3 FAT1 UBA2 NNMT HSP90AA1 MIF PODXL HSP90B1 EGFL6 HNRNPK BTBD1 CCND1 DPM1 BLCAP GOLPH3 ANXA2 VCAM1 ARL6IP1 MRPL3 PSMA4 CTHRC1 SERINC5 CCT3 C3 NID2 FBL TUBB3 TUBA1A MARC1 RPL7L1 DAP3 PCOLCE SRRM1 RBP4 IGFBP3 RBM14 POMP SRSF2 PPL CCT2 TSPAN6 C6ORF62 C1QBP GPI SNRPB	1	223	HBA2 CFD LEP PLIN4 RPL23A TXNIP CHRDL1 DCAF6 ACTB UBC RPS20 RPL9 CAV1 CRYAB ACSL1 RARRES2 RPS11 RPL13A RPL34 FTH1 TUBB2A CD81 RPS29 TPT1 SPARCL1 FAU DYNLL1 AOC3 RPS13 RPL32 SLC25A6 ALDH2 CLEC3B AKR1C3 IRF2BPL PRDX6 SRPX TIMP4 CD63 PPP1R14A ZBTB16 RPL3 CLDN5 FABP4 DBI GPX3 GPX4 FIS1 MRFAP1 PLIN1 SOD1 EEF1B2 ID1 SLC25A3 MT1X MGLL SSR4 CIDEA NQO1 CDIPT COX8A CD151 NPTN RPL11 ISCU SLC25A5 SPCS1 HERPU…	0
drug:P4335:conjugated linoleic acid|mixture-up	16984	365	318	44	LUM TUBA1A COL6A3 CTHRC1 ARL6IP1 PLA2G2A PSMA7 CTSK SRP9 DAP3 RAN UBA2 TOMM20 SRSF9 HSP90AB1 CKS1B FBN1 FNDC1 TGFBI DEK DPYSL2 PPT1 SNRPG PTGES3 YWHAZ TRAM1 LRP11 SFRP2 TSPAN6 NID2 C4ORF46 GPNMB TMX1 CDK2AP1 SCD SMNDC1 SLC19A3 NONO MUCL1 ASPN HEXB EIF2S3 TXNDC12 SNAI2	1	164	RPS25 RPL4 RPL34 RPL6 RPS8 TMEM14C EEF1B2 PCK1 PARK7 RPL9 PFDN5 FHL1 SRP14 GNG11 RPL13A ALDH2 RPL36AL RPL11 PCOLCE2 RPL29 SRPX TUBA1A ALDH1A1 CIDEA MFAP5 PRDX6 OST4 ITM2A RPL27 NDUFA4 ID1 ETFA TBCA GPX3 RPL26 RPL36 ITM2B HADH RNF11 COX7C GLUL SERINC1 DBI OAZ1 CCNG1 TMBIM6 RPL3 MORF4L1 ENPP2 MRFAP1 TMEM100 VAMP3 SNX3 RNASE4 RPL32 SOD1 AMZ2 RPS20 RSL24D1 RPS23 RPS5 ARL6IP5 EID1 GHITM PIGP VDAC2 NDU…	0
drug:P2789:hormone-up	16984	429	363	45	TNNC1 ATP2A2 TCAP SOD2 RPL3L MYH6 GPC1 CSRP3 NCEH1 HK2 HSPA9 NPPA MRPL42 TIMM17A ANKRD1 LBH IVNS1ABP CORIN CDK2AP1 FKBP4 TGM2 MIF TRIM72 PRPF19 POMP GLG1 TMEM65 ADK MRPL30 TNNI3 ATP6AP1 GSPT1 COL4A2 PKP2 MRPS17 PDRG1 COL4A1 RABGGTB QRSL1 TNFAIP1 SUDS3 TUBA1B MOV10L1 PSMA4 MRPL3	1	206	MYL3 MYL2 FABP3 CKMT2 COX7A1 NDUFB8 UQCR10 COX4I1 NDUFA4 HSPB6 UQCRH UQCRC2 FTH1 UQCR11 COX7C COX5B RPLP1 CRIP2 S100A1 COX6B1 UQCRC1 NDUFV1 CHCHD10 ACTC1 COX5A MYBPC3 ETFB NDUFA6 OXCT1 FHL2 NDUFA3 NDUFA2 NDUFV2 NDUFA10 ACTN2 BAG3 ACO2 HRC NDUFS7 NDUFA1 CTNNA1 RPL9 RPS14 UBB ACADVL RPS20 NDUFC1 GJA1 COX17 OGDH DES NDUFA12 HADHB EEF1A2 ACADM ASB2 SSPN ETFA MYOZ2 CD81 NDUFA7 HIGD2A SLC25A5 CLU POPDC…	0
drug:P2788:hormone-up	16984	445	381	48	TNNC1 NPPA ATP2A2 TCAP GPC1 SOD2 RPL3L HK2 CSRP3 MYH6 ACLY NCEH1 ANKRD1 HSPA9 MYBPHL MRPL42 CORIN FKBP4 TIMM17A LBH CDK2AP1 TRIM72 MIF BGN TUBA1B IVNS1ABP GLG1 TGM2 UCP1 POMP ATP6AP1 ACACA TMEM65 COL4A1 GSPT1 PRPF19 MRPL30 TNNI3 COL4A2 ADK SUDS3 F2R RPN2 TNFAIP1 PDRG1 RABGGTB PKP2 NRP1	1	218	MYL2 MYL3 FABP3 COX7A1 CKMT2 NDUFA4 NDUFB8 UQCR10 MYL4 HSPB6 RPLP1 UQCRH COX5B FTH1 COX4I1 CHCHD10 UQCRC2 COX6B1 UQCR11 COX7C NDUFV1 COX5A CRIP2 UQCRC1 ACTC1 ETFB NDUFA10 UBB S100A1 NDUFA6 NDUFA3 NDUFV2 ACTN2 ACO2 OXCT1 NDUFA2 MYBPC3 HRC NDUFS7 RPL9 BAG3 RPS20 CFD RPS14 NDUFA1 FHL2 COX17 CTNNA1 CLU GJA1 NDUFC1 NDUFA12 DES IDH3G HIGD2A EEF1A2 CST3 SSPN PNPLA2 PARK7 ACADVL CD81 ACADM VEGFB DLST OGD…	0
drug:P1875:exendin-4|carbohydrate-up	16984	295	231	27	PATE4 AHCY GLS2 NPM1 HSP90AB1 KRT18 TCP1 EIF3A CCT2 LARP1 FGF21 HNRNPF PRPF19 QSOX2 CCT5 HMGB3 CDC123 LMTK2 RNF8 BCCIP CLSTN1 RABGGTB GRN SERPINE2 ESRP1 NUP210 PAICS	1	123	RNASE4 ANG DUSP26 NUPR1 HERPUD1 NACA PNLIPRP2 ETFA EEF1A1 RPLP2 PTF1A ETFB GNMT RPL36 SOSTDC1 RPL4 ACADVL UBXN1 SYCN RPL36AL COX7A2L CPA2 RPS23 FAU PDCD4 RPL18A RPL23A PINK1 KXD1 EIF3F EIF4A2 EIF3G OS9 HADHA EIF4B CHGA ALDH9A1 EIF3K BHLHA15 CLPS CDO1 GGT1 RPL10 CHCHD10 RABAC1 B2M GCG RPL27 SCG2 EDF1 EEF1B2 VDAC2 KLF15 CCKAR SMPDL3A CNBP NDUFB10 CCPG1 TMBIM6 HADH G6PC2 RPS13 LIFR ARHGEF26 GABARAPL…	0
drug:P2545:4,4'-diaminodiphenylmethane|inhibitor|(2Z,3Z)-bis\{amino[(2-aminophenyl)sulfanyl]methylidene\}butanedinitrile-up	16984	311	290	46	OPN3 ALPP NKX2-1 FBN1 PNMA2 SLC38A4 CFHR1 NTM CDH11 GPNMB LMCD1 MEGF6 GABRE SLC5A3 SCD FADS2 G6PD DPYSL2 FAT1 ISG15 PHTF1 WNT5A ABCA7 PLXNA3 SPARC FCHO1 POLM SREBF1 TNFSF9 NRP1 TSGA10 NREP LIPG KIAA0930 GNE CD55 LPCAT1 DHCR7 FSCN1 LRRC37A2 TRIB2 TNS3 S100A3 SRD5A1 AGTPBP1 NEBL	1	148	CYP1A1 AKR1C3 ID4 AKR1C2 RNASE4 ABCG2 LARP6 RGL1 EDIL3 SMARCD3 LMO3 LIMCH1 ABCA8 SELENBP1 LSS ID3 SECTM1 AHNAK2 NR3C1 SULT1C2 MVP SLC25A1 ACYP2 CA11 SLC22A18 OLFML2A DDX60 CYP39A1 PINK1 ID1 NDRG4 GNAI1 SYNC TGFB1I1 ARMCX1 PDGFD PCYOX1 CTSO GSTA4 GSTM4 RABAC1 DENND3 SLC25A23 RCAN2 MALL RAB4B TGFBR3 ACSL1 PPP1R3C HCFC1R1 AMT PDE9A PNRC1 PMP22 GLYR1 ST3GAL5 HPGD SOCS2 VIPR1 FHL1 TCEA2 TMEM53 NBEA IN…	0
drug:P3489:ethanol|5-amino-1-(5-phospho-D-ribosyl)imidazole|dopaminium(1+)-up	16984	306	236	34	CHST1 THY1 HSP90B1 ARL6IP1 C4B HSPA5 TUBA1B RAB15 CRYM PSMD14 GJB6 LAPTM4B DDN SLC2A1 TUBA1A SEZ6L2 MOBP ENC1 NAA38 RPL7 IFIT3 PHACTR3 CIAO1 LRRC58 TMEM132A HSPA1B FOXG1 ACTR3B GRM5 IFITM3 EPHX4 ZMIZ2 ABHD11 SRP9	1	127	PTGDS SGK1 B2M PENK SCN4B NDRG4 HIGD2A YPEL3 MANF RAPGEF2 SYTL2 RPL10 RPS14 NAP1L5 STMN4 RAB33A INSIG1 HLF SCG5 ALDOC IFI27 RPL10A SNPH FTH1 RABAC1 GSTM5 NRSN1 NUPR1 ARL6IP5 SCG2 PRNP RESP18 MAL DENND5A VIP NDUFA4 TMCC2 NDUFV3 DNAJB9 RPL31 RTN1 NDUFC1 NDUFA6 ACTB DBP BNIP3 RPL32 JTB GPM6A GPX4 CALY ATP6V0C JUN EIF4A2 MAPK3 ITPKA OSTM1 PEBP1 DUSP1 GDE1 RHOB YPEL5 FAM107A NOP10 TMEM50B SDF2 SLC30A4…	0
drug:P3487:ethanol|5-amino-1-(5-phospho-D-ribosyl)imidazole|dopaminium(1+)-dn	16984	332	280	56	TUBA1B RAB15 HSP90AB1 ARL6IP1 HSP90B1 SLC39A10 DZANK1 ATP6V1A HSPA5 CLSTN1 CCT5 DNAJB11 CHORDC1 GRINA DNAJC7 LUC7L3 TMEM132A DUSP14 CRYM LMTK2 VPS26A PRPS1 HSPH1 TCP1 PDIA4 PLA2G7 HSPA1B APOE TIMM17A KCTD1 RASGEF1A TRIM32 MAP2K1 EPHX4 PGM2L1 ATP6V1C1 PSMD12 RALBP1 PFDN6 SLC25A14 GJB6 ZMAT3 RRP1 CCT2 TNK2 SPTAN1 RP9 SLC30A3 HEY1 APBA2 SRSF9 PHACTR3 FAM81A RNF145 NLK ENC1	0.999933	145	PTGDS EGR1 SPARCL1 RPL26 UCHL1 RPL10 DUSP1 ARC SRSF5 GABARAPL1 FBXW7 ATP6V0E2 PRNP RPL3 FOS COX4I1 NRN1 NR4A1 RPS23 MANF RPL11 RPL27A NGEF SCG3 SH3GL2 FKBP2 EEF1A2 PAIP2 ZCCHC18 ALDOC DCTN3 DSTN HPCAL4 SDF2 RTN1 CDIPT GPX4 TTR ATP6V0D1 ITM2C WDR7 RPL4 PSMC3 PEBP1 PRRT2 NPTX1 NDRG2 RESP18 COX6A1 CD81 GSTM5 NDUFS2 CAMK2G LYNX1 VIP FAM3C CCPG1 YPEL3 NDUFV3 FLYWCH1 ST3GAL5 JTB PPM1K AMPH OAZ1 GLRX5 N…	0
drug:P2684:metformin-dn	16984	301	257	38	COL4A1 S100A11 COL1A1 GRINA TNNI2 COL4A2 COL5A1 SFXN1 CYB5B NNMT BGN EIF4EBP1 SPARC YWHAB SLC1A3 DRAM1 ATP2A1 COL15A1 ANXA2 TNNC1 FKBP9 SOD2 SERPINH1 UCP1 THBS2 CCT4 TNNT1 MRAP UACA TIMM17A BLCAP TUBA1B NRP1 MRPL30 RPN2 ARGLU1 ATAD3A GM2A	1	134	CFD PLIN4 PNPLA2 IFI27 CAV1 RPS14 EMP1 COX4I1 BAG1 COX6B1 RPS8 RPL9 NDUFA4 TXNIP CIDEC RPL32 RPS29 NDUFA3 MYL6 MYL2 RPL34 UQCR11 CDO1 TMEM120A RPL3 PRNP UQCR10 MKNK2 UQCRH NDN RPLP1 COX7A1 MAGED2 RPL10A ACADM ETFB NDUFA2 RGCC RPS9 PPP1R1A NDUFV1 NDUFS7 NDUFV2 FCGRT EIF3F NDUFA1 DPT RPS25 NUPR1 RPS11 RPS5 NDUFA7 NDUFA10 NDUFA6 LEP MRPL33 TSPO CLDN5 CTNNA1 PRELP IDH3G MYADM EIF4H RABAC1 MFN2 COX14 …	0
drug:P4880:aflatoxin B1|mycotoxin|dimethyl sulfoxide-dn	16984	282	242	23	S100A2 RPL22L1 MAT1A MIF GRN ASGR1 TK1 NNMT DHCR7 APOE CPB2 ALPP SAA1 BIRC5 BAAT MRPL15 CDCA8 KPNA2 AMOTL2 TGFBI COL18A1 TIMM17A CXCL1	1	141	RPL27 RPL37A TM4SF4 RPS15 RPL13 RPS29 GSTO1 RPS6 ETFB COX5B RPL18 SDF2L1 NDUFA4 ECI1 GSN RPL10A FAU YIF1A MANF COX14 RPS14 SPINK1 HERPUD1 PHB2 NDUFB1 EEF1B2 RPS11 COX7C MRPL41 RPL36 VAMP8 RPL3 TOMM7 EDF1 COX7A2 COX8A CYB5A AKR1C3 MAOA UBL5 UQCRH ADH1C NDUFA1 RPLP2 APOC3 SAT2 RPS20 RPL29 PSMB6 RARRES2 DBI SEC61B LEAP2 ALDOB COMTD1 COX17 RPS27L NDUFA11 UROD ZNHIT1 ALDH1A1 RPS5 NDUFB9 NUPR1 ADH4 TCE…	0
drug:P702:dimethyl sulfoxide|pharmaceutical-up	16984	310	273	40	AGT TSPAN6 UGT2B4 CPB2 ASS1 KRT18 IFI30 ITGAV UBD AHSG CD24 BAAT SPON2 APOA2 ITIH2 HEXB NBPF10 CFHR1 CYP4A22 TIMP1 CREG1 CTSB SERPINA6 ACP5 CDK2AP1 TMEM123 GLDC PROC RPN2 MAT1A TUBA1A DSP DPYS BAMBI COL4A1 IL18 GRN STAU1 RDH16 LAMP2	1	144	ALDH1A1 AKR1B10 TM4SF4 HPD ACADVL ETFA LEAP2 AADAC ECHS1 ACSL1 PEBP1 HADHB CES2 LGALS4 UQCRQ ACAA1 TST SLC25A3 DBI EPHX1 FABP1 GPX4 HSD17B6 GSTO1 PTGR1 HADHA ALDH9A1 APOB PIPOX CIDEB FBP1 AK3 SULT2A1 REEP6 NUPR1 DECR1 ABHD14A SOD1 HIGD1A INSIG1 ACADM DCAF6 TSKU NDUFV2 CD81 ITM2B ADI1 ETFB SCP2 CAPNS1 NDUFS2 CD99 COX6B1 ARL6IP5 P4HB NDUFA1 VNN1 RNASEK PGM1 CHCHD10 GABARAP NDUFA4 AKR1C2 RPL10 UQCRC…	0
drug:P4919:-dn	16984	344	290	36	COL1A2 APOE PLA2G2A COL1A1 COL3A1 LUM TGFBI SPARC TCAP IGFBP3 SFRP2 TNNI2 CTSB UPK3A PPT1 UPK1A FAM25A BHLHE41 GPNMB COL5A2 HOPX HMGN1 GPX8 FNDC1 C4B SPRR1A FCER1G UBD COL5A1 LAPTM4B IGFBP7 HSPA1B IFITM1 FUS PCOLCE UPK2	1	152	CYP1A1 HBB DCN HBA2 MFAP5 RPL9 GSN RPS23 RPL26 TPT1 RPL31 IGFBP6 RPL34 RPS14 RPL5 NACA RPL27A RPS15A RPS8 CST3 PRNP RPL10 RPS20 CD63 RPS15 RPLP1 RPS6 CKM KLF9 FAU RPL4 COX4I1 RPS5 RPS3A RPS11 RPL3 FTH1 RPS13 GDA COX7A2L SCARA5 MYL9 RPS27A DPT RPL18A B2M RPL11 TPM2 RPL13A UPK1B UBA52 SPARCL1 CD81 ITM2B EIF3F MRVI1 VKORC1 UBB RPS29 EEF1B2 TNNT3 DBP JUND RPL27 FLNA UQCRH RPL23A TAGLN MAP1LC3A ACTG2 …	0
drug:P5297:curcumin|messenger RNA-up	16984	335	306	53	TUBA1A SCD CTSB CNP MTPN ATP6V1A MIF ATP6AP1 ENO1 RPL7 SERBP1 FKBP1A KCTD13 MAL2 GM2A BCAT1 DDN APOE DUSP7 GMFB GRIN2B NSF LAMP2 MFAP3L SPRN PAFAH1B2 ATP6AP2 NTM CSNK2A1 PCMTD2 PSAT1 SLC30A3 SSBP4 BZW1 PPP3CA GABBR1 GRINA DPYSL2 PIP5K1A TMEM185B PLK2 SNRPD1 FKBP9 LAPTM4B LY6E LEPROTL1 CYB5B ANP32E BHLHE40 M6PR CHI3L1 PPT1 AGPS	1	157	TUBA1A PLP1 UBB COX8A RPLP1 HPCA ACTB CALM1 CAMK2A ATP6V0C DAD1 CST3 RPS29 CDC42 CCDC107 HPCAL4 SYP UQCR11 FTH1 RPL9 NAPA NDUFB2 COX5A SERINC1 UBL7 ALDOC GRIA2 SYT4 GPM6B CCK COX6A1 RPL10 ATXN7L3B OST4 UBC SLC25A11 CAP1 TMX4 MAT2A DYNLRB1 TMEM47 RPS20 CD81 GRIA3 CLDND1 RNF14 AQP4 MT2A LIX1 PPP1CC DBP ITM2C OCIAD1 APLP1 UCHL1 EEF1A1 IFI27 GJA1 ATP6V0E2 NDUFV1 WFS1 EPHA7 CAMK2B PEPD RABAC1 MT3 CDIP…	0
drug:P4433:oxygen atom|2-butoxyethanol-up	16984	461	359	45	SDS IGFBP1 FASN PYGL PAH CXCL1 IFITM3 SREBF1 HSPD1 SERPINA6 CYP1A2 NIT2 SLC38A4 TUBA1B ABCB11 C1QBP LIPC RPL22L1 ASGR1 DHCR7 CRP LACTB2 PAICS GLS2 AHCY RNF149 PGK1 KRT18 COL18A1 SEC61G BHLHE40 F12 HSD3B7 ASS1 UROC1 BST2 SQLE CYB5B HES6 NNMT CCT5 SMOC1 PDE3B RGS16 HAL	1	198	TAT INMT SLC2A2 RPL31 ACSL5 SULT1A1 GOT1 HERPUD1 NRN1 GSTA3 ALDOB STARD10 RPL3 MARC2 ACTB RPL23A QDPR KHK RPS11 UBA52 SDHB C8G COX4I1 KLF15 FMO5 HAAO ANGPTL3 PCYT2 ME1 NDUFA4 AASS TTC36 LGALS9 RPL4 RPL27A RPL36 RGN RPL10 COX6B1 PIGR FAU RPS15 REEP6 CTH RPLP2 RPS8 UQCRC1 SLC9A3R1 G6PC ALAD APOC3 SEC14L2 DMGDH KXD1 RPS23 TLCD2 NDUFS2 TM7SF2 ABHD14B GSTM1 UQCR11 RPS27A BHMT DBI RPL34 SLC37A4 HEBP1 T…	0
drug:P3574:-up	16984	553	435	61	TUBA1B TUBA1A STMN1 LAMP5 ATP6AP2 PGM2L1 MORF4L2 ATP6V1A ATP6V1C1 VSNL1 PGK1 SLC39A10 PLS3 THY1 SPTAN1 DNAJA1 NLK CCT6A NTM DDN PGBD5 ARL6IP1 LAPTM4B BHLHE40 SLC24A3 PSMD14 MAL2 LRP11 POMP ENC1 TCP1 FAM81A HSPD1 ATP6AP1 HNRNPA3 MAP2K1 CHST1 CCT2 DUSP14 PTGES3 C1QBP RPL22L1 DZANK1 HNRNPK PDP1 PPME1 TNNC1 DHX15 TRIM32 HOPX LRRC58 NAE1 PRPS1 SLC2A1 NDRG3 ATXN7L3 RP9 MCF2L LUC7L3 NANP GRINA	1	216	CCK TUBA1A NDFIP1 OSBPL1A GPM6A SPARCL1 OLFM1 SLC4A10 NAP1L5 NEFL NRN1 SCG3 CALM1 PRNP NRSN1 EGR1 HPCAL4 PEBP1 FBXW7 UNC80 FRRS1L STMN2 B2M ATP6V1D FOS COX7A2 TPPP DSTN OAZ1 GRIA3 NDUFA4 CHCHD2 GABRA1 CALM2 UBE2E1 PTGDS HINT1 SERINC1 SCG5 ATP6V0D1 COX4I1 VIP IGIP COX5A BNIP3 DUSP1 SYT4 NDUFB6 NR4A1 RPS14 RESP18 NAP1L2 PGRMC1 NPTN VDAC2 NDRG2 TSPYL4 COX6B1 WDR7 WASF1 AMPH PRICKLE2 GPX4 IDH3G NEGR1…	0
drug:P3722:cerium|antibiotic|antioxidant|cephalosporin|beta-lactam antibiotic|cerium|cefaloridine|indicator-up	16984	365	309	41	AMACR SPP1 SLC22A1 ACP5 PLAU UAP1L1 CLN6 F2 CCL3 GRN SLC22A6 MCCC2 CXCL1 RPL7 HNRNPM PSMD2 ABCA2 GJB2 DDAH1 ZWINT CHPF RPN2 DPYS ADK ZC3H15 RHCG RTKN SCAMP3 SLC34A3 FASTKD2 G6PD LRBA SLC22A12 VCAM1 RNF114 POMP MIF ATP6V0D2 SLC5A6 PAH PSMA1	1	160	UGT2B15 AKR7A3 GSTA3 GSTA1 ALAS1 NR4A1 FTH1 CRYL1 HSD11B2 SOD1 CHCHD10 GSTM1 CDKL2 EGR1 GADD45G ALDH1L1 ACADM CYB5A EPHX1 RPS6 BTG2 GABARAP JUN DNASE1 ABCD3 ALDOB AP2M1 UGT2B7 UQCRH PPP1CC ACADL CEBPD CNDP2 RPS3A MTCH1 RPS15A CHCHD2 UGT2B17 DPP4 DLST RPL27A NAT8B SLC37A4 CAT AKR1A1 SLC26A4 SOSTDC1 GLOD5 EEF2 NDUFB3 MT2A NIT1 LAMTOR1 ALDH1A1 BTG1 JUNB QDPR ZFP36L1 DUSP5 SGK1 TMBIM6 THNSL2 DUSP1 SA…	0
drug:P2063:pyrrolidine-dn	16984	315	268	38	MIOX ASS1 SPP1 AMACR CTSB IGFBP1 CALB1 DIO1 HSPA9 PGK1 PAH SDS NIT2 APOE CYP24A1 MIF DAO SLC5A3 KMO CXCL1 PSMC4 AHCY MTHFD1 NCBP1 IGFBP3 HRG PSPH FETUB PTCD3 OPLAH CHDH ADK LAD1 TOMM20 EXOSC5 ICAM1 UBD LRPPRC	1	146	DNASE1 OAT SPINK1 COX6A1 PCK1 HPD MDH1 GPX3 SLC3A1 ACY3 CYB5A B2M PEBP1 CSRP2 COX4I1 GPX4 COX7B UQCRC1 PRDX5 SULT1C2 ALDOB GOT1 CISD1 ATP6V0C OSGIN1 NDUFA1 TEX264 NIT1 AK4 ECHS1 NDRG1 BNIP3 TXNIP CAT NDUFS5 GHITM NDUFA5 GSTO1 HGD NFKBIA GABARAP RPL32 ERRFI1 OGDH IAH1 TMEM50B ABHD14B ACOX1 UBB GNMT APOM RPL36AL MT1A HAGH RPL10 CLU SLC26A4 CTH UQCRB COX5B HPN NDUFB9 HERPUD1 ZFP36 RPL35A CST3 JUNB N…	0
drug:P5764:dimethyl sulfoxide|diisononyl phthalate-up	16984	448	360	29	F2 SHMT2 ENO1 MIF RBP4 APOC1 AGT PSMA1 ASGR1 POMP RPL22L1 CTSB MARC1 GJB2 LACTB2 ABCB11 GLRX3 HP APOA2 HSPD1 CHUK SLC22A1 PSMB2 TGM2 SEC61G SNRPG MIOX RAN SERPINE1	1	227	ACOX1 PCTP CHCHD10 HACL1 ADTRP EPHX1 DECR1 ABCD3 CHCHD2 FBP1 HADHB HSD17B4 ECI2 CMBL FABP1 DBI ALDH1A1 STARD10 ETFB CAT EPHX2 GPD1 CREB3L3 CIDEA GDE1 TMEM14C PHYH HSDL2 EHHADH SLC25A20 CHPT1 SAR1B GLRX5 MGST3 RETSAT NUDT7 TXNIP COX7A2 FAU CISD1 RARRES2 UQCRB PPCS RPL15 RPL26 PEX11A UQCRQ NDUFB9 HSD17B11 NDUFA4 BHMT CISD3 IFI27 HPD EEF1B2 NDUFC1 ACO2 ACADM TBCA COX5B ACADVL ACADL UQCR10 RPL27A RPS…	0
drug:P5765:dimethyl sulfoxide|diisononyl phthalate-up	16984	437	352	23	F2 ENO1 SHMT2 MIF VMP1 PSMA1 ASGR1 SEC61G POMP RPL22L1 GJB2 MARC1 LACTB2 GLRX3 S100A11 RAN PSMA7 SNRPG HSPD1 MIOX PSMB2 UBD TGM2	1	227	ACOX1 CHCHD10 EPHX1 ADTRP DECR1 FBP1 HACL1 ABCD3 PCTP HADHB CMBL HSD17B4 ECI2 ALDH1A1 GDE1 DBI GPD1 FABP1 ETFB EPHX2 FAU CHCHD2 CREB3L3 HSDL2 TMEM14C CIDEA MGST3 STARD10 CHPT1 GLRX5 COX7A2 SLC25A20 PHYH EHHADH NUDT7 RETSAT COX7B CISD1 SAR1B RARRES2 TXNIP IFI27 UQCRB NDUFB9 PPCS PEX11A NDUFC1 TBCA HSD17B11 ACADL RPL26 CISD3 CAT RPL15 ACADM NDUFA4 RPL18 SLC22A18 ACADVL UQCRQ AGMO RPS15A HPD PDK4 RP…	0
drug:P5766:dimethyl sulfoxide|diisononyl phthalate-up	16984	422	335	28	MIF F2 S100A11 SHMT2 UBD PSMA1 CRP RBP4 VMP1 MARC1 ENO1 SEC61G NIT2 AHCY DHCR7 ASGR1 POMP LACTB2 MIOX GJB2 GLRX3 NDUFA4L2 CREG1 RPL22L1 SLC22A1 SERPINE2 RAN HP	1	215	EPHX1 CHCHD10 ACOX1 ALDH1A1 DECR1 GSTA5 AKR7A3 FBP1 STARD10 MGST3 FABP1 CIDEA HSD17B11 CHPT1 ADTRP RETSAT SELENBP1 HACL1 GDE1 HADHB FAU GSTA4 COX7A2 TMEM14C EPHX2 HPD RARRES2 CREB3L3 CMBL ABCD3 EHHADH UQCR10 PIGR ETFB HSD17B4 NDUFB11 UQCRQ ECI2 CHCHD2 UBA52 CYB5A GPD1 NDUFB9 PCTP COX7B NDUFC1 CAT HSDL2 SLC25A4 CISD3 GLRX5 CST3 SLC25A20 COX6A1 ACO2 ACSM1 GLRX AKR1A1 PECR TPRG1L ALAS1 PODN ACADL NU…	0
drug:P4492:nitric oxide|propan-2-ol|apocynin|angiotensin|losartan|phenobarbital-dn	16984	285	246	32	COL3A1 COL1A1 ELN COL1A2 C4B SPARC CXCL1 VCAM1 LUM DNAJA1 GRN POMP BGN ICAM1 GNS NUDT4 SNRNP70 AGT HSD3B7 GJA4 PCOLCE UBR5 PLEC SLC25A17 HP HSP90AB1 ASPN AEBP1 PEX1 DOCK9 GNAI3 SYT3	1	132	MYL9 SPARCL1 UBB AHNAK CLU NR4A1 CPE UBC FTH1 ZFP36L1 BTG2 CST3 MAP1LC3A KLF4 DCN EGR1 CD59 FABP4 ATF3 CSRP2 RHOB COX8A SULT1A1 CRISPLD2 CFD RPS14 MDH1 RPS29 ITM2B KLF6 XDH KLF9 DUSP1 SLC25A5 NDRG2 COL4A5 ERRFI1 CDO1 TPT1 ARC JUN TPM2 NFKBIA COX7A2 FOS KANK2 NDUFB2 ALDH2 CSPG4 HIGD1A UQCR11 TSPO GPX4 TOM1L2 CD81 OAZ1 SNCG DYNLRB1 VEZF1 NEK7 SUCLG1 RPL31 NR4A3 NDUFB4 COX5B AUH LGALS3 NDUFA4 ZFP36 …	0
drug:P2643:4,4'-diaminodiphenylmethane|dimethyl sulfoxide|inhibitor|(2Z,3Z)-bis\{amino[(2-aminophenyl)sulfanyl]methylidene\}butanedinitrile-up	16984	320	296	39	ALPP OPN3 NKX2-1 FBN1 SLC38A4 GABRE GPNMB MEGF6 CFHR1 NTM PNMA2 LMCD1 SLC5A3 TGFBI ISG15 IFIT3 DAB2 G6PD SCD TSGA10 ABCA7 SREBF1 CD55 IFITM3 PLXNA3 ARL4C RABL2B NEBL SAMD9 TNFSF9 EFNA1 NOS3 CUL4B TNS3 FASTKD1 CD24 NREP ARID5B LRRC37A2	1	157	CYP1A1 AKR1C3 AKR1C2 ABCG2 ID4 LIMCH1 RGL1 RNASE4 NR3C1 ABCA8 GNAI1 LMO3 SECTM1 ID3 SELENBP1 SOCS2 CA11 CTSO OLFML2A TXNIP SMARCD3 SULT1C2 EDIL3 LARP6 SLC22A18 ACYP2 PDGFD PDE9A ID1 GSTA4 PPP1R3C SLC25A1 MVP VIPR1 ABHD4 DDX60 TIPARP SYNC PMP22 NDRG4 DENND3 MT1E TGFB1I1 PINK1 CYP39A1 RCAN2 GSTM4 AHNAK2 AMT LSS ACSL1 SLC25A23 PNRC1 TMEM140 TCEA2 RABAC1 HCFC1R1 ID2 ME1 MRPS6 RAB26 LRRC23 SMAD7 RAB4B…	0
drug:P2587:4,4'-diaminodiphenylmethane|dimethyl sulfoxide|inhibitor|(2Z,3Z)-bis\{amino[(2-aminophenyl)sulfanyl]methylidene\}butanedinitrile-up	16984	306	284	44	ALPP OPN3 NKX2-1 FBN1 PNMA2 SLC38A4 CFHR1 NTM GPNMB MEGF6 LMCD1 GABRE SLC5A3 SCD G6PD DAB2 DPYSL2 FAT1 PHTF1 FADS2 CDH11 SPARC CD55 ISG15 ABCA7 WNT5A IFITM3 TNS3 TGFBI GNE ARL4C TRIB2 NREP FZD2 ARID5B IFIT3 SREBF1 CUL4B TNNT1 NEBL ASS1 KIAA0930 DHCR7 AGTPBP1	1	143	CYP1A1 AKR1C3 AKR1C2 ID4 RNASE4 ABCG2 EDIL3 RGL1 LMO3 LARP6 LIMCH1 ABCA8 SECTM1 NR3C1 SELENBP1 ID3 SMARCD3 MVP CA11 SLC25A1 OLFML2A LSS GNAI1 AHNAK2 ID1 SLC22A18 SULT1C2 PINK1 GSTA4 DENND3 ACYP2 CYP39A1 NDRG4 RCAN2 SYNC RABAC1 DDX60 AMT CTSO PDE9A SLC25A23 TGFBR3 HCFC1R1 RAB4B PCYOX1 VIPR1 PNRC1 PDGFD FHL1 GSTM4 ACSL1 PMP22 MALL ABHD4 SOCS2 PPP1R3C TMEM140 TIPARP FUCA1 LRRC23 TMEM53 TCEA2 ALDOC H…	0
drug:P3451:ethanol|glucocorticoid|dexamethasone|solvent-dn	16984	303	273	41	THEM6 FASN CCT2 CDK2AP1 IL18 STEAP1 STEAP2 KLK4 PIK3R2 MAFB ISG15 IFI6 ATP6AP1 GSPT1 POLD2 POMP PTRH2 PRPF19 AHR AIMP2 GNL2 TOMM34 DNAJA1 URI1 NAA38 SSB ACTR2 TSPAN17 TFRC NOP56 NUDT5 CDK19 ARPC5 WWP1 IRAK1 SLC39A8 CDC123 TUBA1B MYH9 ATP6V1A TUBA3E	1	139	TXNIP S100P SGK1 DHRS7 MYL6 MAOA UGT2B7 REXO2 DBI NFKBIA TMBIM6 RPS27L PARK7 COX8A RPL11 PACSIN2 DDX5 CNDP2 NUPR1 JMJD8 SERPINB6 VAMP8 ERRFI1 RPL36AL NDUFA8 PFDN5 MRFAP1 FKBP5 EEF1A2 NCOA4 RPL13A RPS6 GLRX5 DECR1 HACL1 NDUFB2 ARL6IP5 B2M DNAJC28 SPATA20 IMP3 DYNLL1 MRPL41 PDHB LIMCH1 OAZ1 SEC11C UGT2B17 ATP6V1E1 HIGD2A RPLP2 RHOC MXD4 CD81 NDUFS7 ACAT1 COX4I1 RPL6 RPS11 ATP6V0E2 RPL27 GHITM GPX4 …	0
drug:P5775:dimethyl sulfoxide|clofibrate-up	16984	336	276	27	UBD MARC1 F2 HSPD1 MIOX LACTB2 CHUK LAMP2 SHMT2 BAAT DHCR7 MOSPD1 SLC25A13 ASGR1 TGM2 SERPINE2 GJB2 BBOX1 ADK MOSPD2 PYGL VMP1 BCAP31 PSMA1 CYP17A1 NIT2 ABCB11	1	174	EHHADH FABP1 ACOX1 ECI2 RETSAT HACL1 DECR1 ALDH1A1 ADTRP HADHB ACADM ABCD3 PCTP HSD17B4 EPHX2 ACADL CIDEA CAT ACOT2 HSDL2 FBP1 NUDT7 VNN1 CD36 AGMO GSTA5 SLC25A20 OAT ALDH3A2 GSTA4 GPD1 CREB3L3 CHPT1 TXNIP CHCHD10 SULT1B1 ETFB CMBL PODN MGST3 MTTP TMEM14C CHCHD2 PHYH ACADVL AQP7 ETFDH HSD17B11 CRAT CPT2 ACAT1 EPHX1 UQCRB PDK4 SAR1B GLRX5 STARD10 GSTA3 ACO2 PEX11A LPCAT3 HSD17B6 PECR HIBCH MOCS2 A…	0
drug:P4951:donor|dimethyl sulfoxide|agonist|rosiglitazone|insulin-sensitizing drug-dn	16984	600	528	100	HP RBP4 APOH APOC1 AHSG APOE C3 SAA1 FGL1 AGT PKN2 SPON2 HRG F2 LBX1 VHL ASGR1 CASKIN1 C4BPA F12 PRR7 IFITM5 ITIH1 CPB2 LPA NNMT TMEM123 MAT1A SERPINA6 IFITM3 SLC12A7 IFI30 PLG TRAM1 UGT2B10 PRG4 FADS2 UGT2B4 C9 GRIN2D PHRF1 KPNB1 SULF2 NAA38 CFHR1 BAAT KLK3 SHMT2 USP9X HMGN1 KNG1 DSP KRT18 COL18A1 ATP13A3 MEX3D FN1 IRF2BP2 IER5 MZT2B GGH LIPC C6ORF62 CRYM BAMBI ALPK1 CXCL1 UCN2 DPM1 EBPL KIAA201…	1	234	TTR DRD4 PRNP RPLP1 TM4SF4 CRTC1 SERPINC1 RPS14 RPS20 B2M TMBIM6 UBB APOA1 TPT1 CDC42EP5 RPL13A RPL10A APOC3 DBI MYL6 TPSG1 RPS11 HINT1 OAZ1 SOD1 FAU P4HB METTL7A SRP14 CYP2C9 COX6A1 HERPUD1 ANG NFE2L1 UGT2B7 CHCHD2 ETFB ALDH2 SDF2L1 CYB5R3 NDUFB2 COX7C MPST HEBP1 TUBB2A LEAP2 PGRMC2 ECHS1 NPAS3 SPPL2B MANF ALDOB SELENBP1 SIK1 FABP1 UGT2B11 A1BG SEC61B PRDX6 VKORC1 ACTB BHMT NDUFV2 DSTN NFKBIA RP…	0
drug:P743:calcium atom|hydride|L-dopa|antioxidant-up	16984	528	466	74	ATP6AP1 TNK2 GRIN2C HSPA5 GANAB ARHGAP39 TUBB3 ABCA2 PADI2 FABP7 SPTBN2 PDCD5 HNRNPM FBL SPTAN1 FOXG1 ACLY PRMT1 AKAP8 RTKN ZWINT HES7 PFDN6 APLN POMP ENO1 DDN STMN1 PARP1 AGT CACNB3 SNRNP200 KCNQ3 MOBP PRR3 MAP2K1 DNM1 ATP2A2 PLEKHG5 SEZ6L2 CST6 PSMB2 LHX2 GRIN1 SHANK3 RBM8A ENOPH1 CTTN FKBP1A GRM1 CHPF EGR4 ABCF1 GIT1 REPS1 APOC1 NOP16 SLC2A1 HTATSF1 TARS2 KLK8 ZC3H15 UCKL1 SERINC5 TSPAN17 FASN…	1	220	PLP1 UBB COX6A1 APBB1 PIN1 HPCA MTCH1 SERP2 UQCR11 UBA52 SNRPN OLFM1 ITPKA UBC NDRG4 CALM3 NPDC1 PMM1 RTN1 SPARCL1 MT3 CRYAB SYP EIF4H SCG5 MYL6 RNF167 AP2M1 ARL3 SNN RPL13 FRRS1L EEF1A2 CHCHD2 DDX5 SUCLG1 ROGDI MPDZ ABCD3 DYNLL1 PRKCB KCNB1 CLU NDUFB8 SECISBP2L FTH1 ACSBG1 MPV17L2 NR4A1 IST1 NDUFA1 NDUFB2 NEFM SERINC1 NDUFB3 ACTB SF3B5 RPS6 AGPAT1 APLP1 NDUFA12 RPS11 ARHGEF25 VAMP3 NDUFA6 HAPLN2…	0
drug:P3512:ethanol|5-amino-1-(5-phospho-D-ribosyl)imidazole|dopaminium(1+)-dn	16984	309	249	33	THY1 FAM81A PPP1R1B DDN GRINA CRYM INO80 ACTR3B SEZ6L2 CNP ICAM5 U2AF2 DHX15 FOXG1 CPLX1 SLC2A1 SLC35D3 PSAT1 HSPA5 CHST1 SSBP4 RPL22L1 KCTD1 LAPTM4B LRRC58 TMEM88B SLC12A2 KLF16 PGBD5 RRP1 PARG OSBPL8 PHLDA1	1	138	PENK SGK1 CHCHD2 PTGDS WFS1 RPL31 CST3 CHCHD10 PSD PINK1 GNG7 CKB DBP COX5A NGEF CADM4 SIRT2 PPP1CA GPM6A ATP6V0E2 NPY CIRBP PDE1B RPLP2 SCN4B METTL9 ARHGDIA FAT3 USP2 SST ALDOC NDUFA1 CAMK2B NDRG4 UQCRB FBXL5 RABAC1 KCNA5 WIPF3 NDUFA6 UQCRH NDUFB6 CNBP EGR1 SLC22A17 NDUFA5 PER1 ASPHD2 ATP6V1D ITPKA TMCC2 COX6B1 NDUFA2 SDHB NDUFS5 ID4 WBP2 OAZ1 RPL27 NEFM SECISBP2L PRRT2 NEFL CHST15 PFKM TTR SYT1…	0
drug:P2447:4,4'-diaminodiphenylmethane|dimethyl sulfoxide|inhibitor|(2Z,3Z)-bis\{amino[(2-aminophenyl)sulfanyl]methylidene\}butanedinitrile-up	16984	320	296	40	OPN3 ALPP PNMA2 NKX2-1 FBN1 SLC38A4 CDH11 MEGF6 GPNMB GABRE LMCD1 TRIB2 SCD NTM CFHR1 WNT5A SLC5A3 FADS2 PHTF1 DPYSL2 G6PD GNE DAB2 LIPG DHCR7 SREBF1 TNS3 POLM NREP CD55 CUL4B LPCAT1 ABCA7 TSGA10 ARID5B KIAA0930 AGTPBP1 APOC1 SRD5A1 ZNF322	1	155	CYP1A1 AKR1C3 ID4 AKR1C2 RNASE4 RGL1 EDIL3 ABCG2 ID3 LARP6 ID1 NR3C1 LIMCH1 SECTM1 MVP LSS LMO3 SLC25A1 GNAI1 CA11 SELENBP1 PMP22 ABCA8 PDE9A SULT1C2 SMARCD3 PDGFD OLFML2A NDRG4 SLC22A18 GSTA4 TGFB1I1 SYNC CYP39A1 PINK1 RCAN2 AHNAK2 CTSO DENND3 ACSL1 VIPR1 GSTM4 TGFBR3 RABAC1 SLC25A23 PCYOX1 DDX60 ARMCX1 INSIG1 ACYP2 PNRC1 PPP1R3C ST3GAL5 HPGD RAB4B MALL HCFC1R1 MRPS6 ALDOC TMEM53 FUCA1 ME1 NBEA …	0
drug:P764:psychotropic drug-dn	16984	311	257	26	TUBA1B APOE SLC2A1 CAMK2N2 PFDN2 PSAT1 TUBA1A PDAP1 GJB6 MIF PPP1R1B CLSTN1 YWHAB RNF169 STRAP DDN PSMA7 BHLHE40 RNFT2 STK32C MOBP VSNL1 CARHSP1 CDK5R1 GRN PGBD5	1	137	DBP SGK1 RASD2 UBA52 COX4I1 RPS14 UQCRH NDRG2 FAM107A KLF9 RPLP1 PTGDS RASL11B RPS9 FTH1 WIPF3 CPE RPS25 RPL3 RPS15 RPL34 COX6B1 CST3 NDUFA1 EIF3F RPL18A IFI27 PDE1B MT3 TRNP1 GABARAPL1 SERP2 NDUFA11 VAMP2 GPR37L1 PPP1R1A RPL32 EIF1B RHOB TUBA1A CALM3 WASF1 RAB6B LDB1 EIF4H PHPT1 NDUFB3 RAMP1 COX14 ITPKA FIS1 ALDH2 SPOP ATP1A2 UBXN1 NDN MTCH1 SUN2 RAB3A APLP1 STMN4 JOSD1 DCLK1 C1QTNF4 RPL10A FABP…	0
drug:P765:psychotropic drug|imipramine-dn	16984	298	232	24	TUBA1B PPP1R1B TUBA1A FBXO41 AKAP5 MIF PDAP1 OPALIN PPME1 SLC2A1 INTS1 NREP RIN1 IDO1 TFRC PSAT1 DDN GM2A SNRPF ENO1 RASGEF1A BCL11B PLK2 CDK5R1	1	128	DBP CPE RASD2 PDE1B RPL18A NDN KLF9 HPCA COX4I1 RASL11B RPLP1 RPS29 C2CD2L ACTB PPP3CB PPP1R1A LDB1 VAMP2 RPL10A GABARAPL1 RPL32 FKBP8 SPOP RPL3 RPS15 EIF3F TRNP1 PLP1 TUBA1A ATP6V1E1 CHCHD10 PRKCB CST3 C1QTNF4 RPL34 SERP2 WIPF3 ARPC2 SST CRIP2 PRNP RGS9 CYGB TSPAN7 OAT WASF1 PCP4L1 NUDT16L1 GPR37L1 HIGD2A RPS25 NDUFA10 FAM131A COX14 SCG3 MMD2 FIS1 ITPKA CIRBP SMPD3 UBE4B RNPEPL1 PTTG1IP DCLK1 SU…	0
drug:P766:psychotropic drug-dn	16984	308	253	28	TUBA1B OPALIN TUBA1A SLC1A3 APOE PSAT1 IDO1 NREP DDN PPP1R1B MIF ENO1 CNP PGM2 CRYM RNFT2 STRAP PFDN2 IGF2 TFRC GM2A PDAP1 ZIC1 ASS1 IFITM3 SPARC CDK5R1 ELP3	1	138	DBP CPE PDE1B RPLP1 CST3 SGK1 TSPAN7 RPL3 PPP1R1A HPCA RASL11B RPL10A COX6B1 GABARAPL1 RHOB ITPR1 NDN TUBA1A RPS29 RPS9 C2CD2L ATP1B2 APLP1 COX14 RABAC1 TCEAL5 CD81 UBA52 CIRBP PTGDS PKIA SRSF5 NDRG2 RASD2 FIS1 NDUFA11 GPR37L1 RPS15 UQCRH TRNP1 CORO1C C1QTNF4 QDPR MTCH1 RAMP1 RPS6 PHPT1 LDB1 WFS1 EIF3F CMTM5 NDUFA1 EEF1A1 PFDN5 ITPKA SERP2 SUN2 RPL18A LMO2 ALDH2 FTH1 ACTB WSCD1 SSR4 WIPF3 FAM107A…	0
drug:P760:psychotropic drug-dn	16984	310	256	34	SLC1A3 ACLY CRYM SPTBN2 BTBD1 CHST1 FKBP1A SFXN1 CD47 PFDN2 CNP OPALIN IDO1 FBXO41 PPP3CA TMEM158 MOBP LRP11 MRPL42 MIF SEC61G MRPS17 HSP90AB1 PSMC1 GM2A CARHSP1 DCLK3 APOE HNRNPM SPRED1 PPP1R9B SPARC SLC24A3 RNF145	1	132	TTR UBB RPL9 PRKACB ITPR1 CST3 RPL18A COX6A1 RGS4 COX5A PDE1B HPCA KLF9 GAP43 UQCRH RPS11 RPL27 NDUFS8 CSRP1 WFS1 RPLP1 MT3 PTGDS COX7A2L NDN NDRG4 MFN2 CD81 BRK1 AKR1A1 UQCRC2 RASD2 PTTG1IP CALM3 RPL36AL CRIP2 RPS9 SPOCK3 WASF1 ATP6V1D FTH1 ARHGEF4 TSPAN7 GABARAP NDUFS3 COX14 JOSD2 SRP14 ISCU TCEAL5 EIF4H CMTM5 NDUFA7 FAM110B PENK C2CD2L NDUFA11 UBL5 ARPC2 AP2M1 SMPD3 UQCR10 TRAPPC2L HAGH PRKCB …	0
drug:P2057:pyrrolidine-dn	16984	360	307	45	IGFBP7 DAO DIO1 COL1A2 PMEPA1 APOE ALOX15 SPARC DAB2 IVNS1ABP SLC22A6 CTSB SPP1 CDH16 ATP6AP2 FMO1 ASS1 HSPD1 S100A11 NREP UCP1 NUAK2 SFRP2 DDAH1 OPLAH IRF3 PAH KRT7 ACTR2 MTHFD1 SLC34A3 GREM1 PLAU ANXA1 ERMP1 COL15A1 MMP9 ALX1 PLSCR2 HPRT1 CLDN16 UAP1L1 LAMP2 LY6E CHDH	1	172	GPX3 HBB HBA1 PCK1 SLC3A1 ALDOB ITM2B FTH1 UBB B2M DBI SULT1C2 SOD1 COX6A1 PTTG1IP ACY3 FBP1 PEBP1 ATP6V0C AGXT2 DNASE1 GRHPR DCN SGK1 SMOC2 CCNI ALDH1A1 TEX264 OAZ1 DPT GSTO1 ATP6V0E1 G6PC MDH1 TXNIP ECI1 CYB5A CRYAB SKP1 SDHC BPHL SOSTDC1 COX8A SOD3 SLC22A5 ACADM TMBIM6 MAL PYROXD2 GSTA2 HADH KLF9 RPL32 CPQ ABHD14B SLC37A4 PTH1R EFHD1 COX7B ARHGAP24 MAP2K2 HGD COX4I1 RETSAT NAT8 ACSM2A PC ACADL…	0
drug:P4331:conjugated linoleic acid|mixture-up	16984	409	352	50	LUM MUCL1 IFITM3 PLS3 IFITM1 DPYSL2 YWHAG NID2 SFRP2 PLA2G2A LRP11 UBA2 CTHRC1 C6ORF62 ASS1 SRSF9 DAP3 SRP9 NNMT MEST TSPAN6 FNDC1 KDR SH3KBP1 COL15A1 PIP APLNR CTSC SNAI2 YWHAZ MIF TOMM20 TUBA1A HCAR3 HILPDA TRAM1 PCOLCE MARCKSL1 HEY1 FBL SLC19A3 BST2 NONO COL4A1 EIF2S3 VCAM1 IGFBP7 SCD TIMP1 FBN1	1	206	PCK1 ALDH2 RPS25 RPL4 RPS8 FHL1 SPARCL1 SRPX ALDH1A1 RPS5 TIMP4 AOC3 CIDEA UBC GPX3 ENPP2 RPL11 ID1 GNG11 RPL6 ITM2B GLUL RPS13 RPL36 RNF11 ITM2A EEF2 HADH PRDX6 EEF1B2 CSRP2 CFD SERINC1 OAZ1 ID3 TMBIM6 PARK7 ACSL1 TMEM14C RBP7 CD99 TBCA OST4 VAMP3 RPL29 GYPC ISCU PHYH RPS23 MFAP5 SLC25A3 SPCS1 UBB RNASE4 RETSAT RPL13A ETFA AQP7 COX8A CLDN5 SLC25A6 CD81 PGM1 MAOA CHCHD2 CYSTM1 RPL9 MYOC NDUFA3 PK…	0
drug:P4333:conjugated linoleic acid-dn	16984	262	212	30	SH3KBP1 HILPDA C4ORF46 PMEPA1 MUCL1 PIP BCAP31 BLCAP AMOTL2 KRT14 YWHAG HOXC6 CCND1 HSP90B1 MARC1 COL1A2 NBPF10 SERINC5 IFITM3 MXRA5 CPNE3 SF3B1 IQGAP1 FAT1 RAD23B RBP4 MZT2B EIF4G1 LPGAT1 NFAT5	1	117	HBA2 CFD DCAF6 RPL23A RARRES2 RPS11 PLIN4 CD81 CD63 GPX4 LEP RPS29 PPP1R14A TIMP4 TXNIP CRYAB ACTB CLEC3B UBC COX7A1 RTN4 ACSL1 RPS8 OAZ1 PLIN1 TUBB2A RPS5 FAU SLC25A6 MGLL NNAT CDIPT NFKBIA MT1X RNASEK SSR4 CLDN5 FIS1 COX8A ZBTB16 PGM1 TPT1 FAM107B SLC25A1 RPL13A UQCRH C12ORF57 RPS13 AQP7 IRF2BPL FERMT2 CD151 RDH5 HOOK2 PRDX5 TSPO UGP2 PJA2 AGPAT2 TMEM100 EMP1 CD36 AOC3 ARHGEF6 SF3B5 CNRIP1 ATP6…	0
drug:P4454:oxygen atom|2-butoxyethanol-dn	16984	539	394	56	HAMP RBP4 PLG AHCY APOC1 PAH MAT1A APOE PYGL TTPA APOA2 PROC SERPINA6 CYP1A2 HRG ELOVL2 KNG1 CREG1 ITIH2 AHSG HAL GLS2 SLC38A4 LIPC HSD3B7 ABCB11 ASGR1 PHLDA1 APOF INO80 C3 F2 HSP90AB1 MLXIPL NIT2 F12 LAMP2 LACTB2 HSPD1 COL18A1 F5 RPL7 MARC1 SERPINF2 PAICS BCAP31 SLC25A13 FASN ITIH1 RNF149 CXCL1 PERP SREBF1 C1QBP POMP SLC17A2	1	220	KXD1 HPD INMT APOC3 CDO1 SERPINC1 FTH1 GNMT ALDOB PIGR CYB5A FABP1 RGN PHYH EEF1A1 OAZ1 RPL31 APOA1 TTC36 CHCHD10 SLC2A2 GABARAPL1 UBA52 QDPR APOB STARD10 RPS29 ACSL5 COX4I1 C8G AADAC ACADM NRN1 MARC2 NDRG2 TTR KLKB1 RPL4 RPL27A EPHX2 UQCRB SDHB RPS23 TMBIM6 FBP1 PGRMC1 RPL23A COX6A1 ALDH1A1 SEC14L2 RNASE4 COX6B1 REEP6 RPS15 FAU RPS27A EIF4A2 RPL10 RPL10A RPL11 RPL26 UQCRC1 EPHX1 RPL32 ABHD14B DB…	0
drug:P5757:hydrogen chloride|dimethyl sulfoxide|chlorpromazine-dn	16984	330	262	46	HRG PAH PLG FETUB F2 ADK ACLY C3 RBP4 APOA2 BBOX1 HP HSP90B1 APOC1 GPI FGL1 LOX APOH BST2 PROC RCL1 SHMT2 FABP7 SERPINF2 C4BPA MIF ABCB11 IGF1 ITIH2 PYGL F12 ASGR1 MAT1A PSMA7 HSPA5 DCAF13 TTPA SRD5A1 RDH16 RPN2 MTHFD1 CFHR1 AGT SLC25A13 CRP DAO	0.999998	136	BHMT SULT1B1 SULT1A1 SLC37A4 PHYH ALDOB BHMT2 ACSM1 PECR PIGR EIF4EBP3 CITED2 GNMT TSPO GAMT MGST3 P4HB GPT FBP1 DECR1 RARRES2 SERPINC1 CTH CYP27A1 MGST2 FGA QDPR TM4SF4 F10 CHPT1 ADTRP CMBL C8G PDHB ETFB CDO1 STARD10 ECHS1 PXMP2 ATOX1 COX7A2 TSPAN12 ANGPTL3 KHK SEC61B RNASE4 FABP1 UGP2 GSTM3 NDUFB9 ALDH2 UQCRB ALDH3A2 HSD17B4 GSTZ1 TSPAN7 ALDH9A1 BTG1 IFI27 VKORC1 CIDEB COX8A HSD17B11 NDRG2 HPD …	0
drug:P2601:4,4'-diaminodiphenylmethane|inhibitor|(2Z,3Z)-bis\{amino[(2-aminophenyl)sulfanyl]methylidene\}butanedinitrile-up	16984	292	269	34	OPN3 ALPP NKX2-1 FBN1 SLC38A4 MEGF6 GPNMB NTM CFHR1 LMCD1 PNMA2 GABRE SLC5A3 G6PD DAB2 TGFBI SCD ABCA7 SPARC ISG15 SREBF1 NRP1 NREP ARL4C FADS2 NEBL PHTF1 AGTPBP1 TRIB2 TNS3 CD55 CD24 PLXNA3 EFNA1	1	145	CYP1A1 AKR1C3 AKR1C2 ID4 ABCG2 RNASE4 RGL1 LARP6 LIMCH1 ABCA8 SECTM1 SELENBP1 MT1E LMO3 NR3C1 ID3 CA11 OLFML2A SOCS2 SLC25A1 SULT1C2 SLC22A18 EDIL3 GNAI1 PDE9A SMARCD3 MVP NDRG4 ID1 ACYP2 GSTA4 RCAN2 SYNC PINK1 DDX60 VIPR1 ABHD4 LSS CYP39A1 AMT PDGFD CTSO DENND3 PNRC1 RABAC1 AHNAK2 GSTM4 SLC25A23 HCFC1R1 TIPARP RAB4B TXNIP LRRC23 TMEM140 ACSL1 PCYOX1 FUCA1 GABARAPL1 TCEA2 PRKAR2B TLR3 ME1 RAB26 N…	0
drug:P2035:fluoxetine|sucrose|antidepressant|imipramine|L-proline residue-up	16984	471	432	72	LRRN1 TUBA1A NRCAM GABRA3 SLC24A2 DNAJA1 RAD23B THY1 CD47 MAP2K1 GAD1 YWHAB PDIA3 SCN2A KCNK9 FAM49B CLTC SLC1A3 DNM1L HSP90AA1 STMN1 YWHAG SULF2 KCNV1 NETO1 SEC61G SPARC HSP90B1 SLC6A1 ACTR2 PLXDC2 YWHAZ ENC1 HSPA5 CALB1 ZMYM2 PRPS1 NAA38 RAB3B PSMA1 KPNA3 BZW1 ATP6V1C1 GABBR1 PDCD5 ANKH ADD3 ACSL4 CASK LAMP2 COPA CRYM SERPINE2 YME1L1 KIF5B ENO1 NAA10 ATP6AP1 CERS5 XPO7 IL1RAP SRSF2 LSM12 PERP P…	1	210	KCNIP3 MT2A SST CCDC107 SPCS1 DSTN MAPK10 GNAO1 CFL1 PCSK2 TUBA1A PGRMC1 FAM107A RPS29 UQCRH SLC17A7 DAD1 GSTO1 RRAGB NDUFV2 CALM1 GPM6B RPL31 ATP6V0D1 PPP3CB PFN1 RPS15 COX6A1 SGK1 EEF1A1 TMEM50B NDUFS4 UQCR11 GPR22 CLIP3 ARPC2 ACO2 DLG2 B2M MAP1B NDUFB11 TRAPPC1 RNF14 PTGDS GNG3 LRRTM3 ID2 EPHA7 COX7B DCTN6 RAB6B GABRA5 PRKCE PRKCA DYNLRB1 PDE1A PRDX6 RBFOX3 SLITRK3 RPL18A GABRA1 VAMP2 CD59 GST…	0
drug:P2038:sucrose|antidepressant|imipramine|L-proline residue|fluoxetine-up	16984	416	386	60	MAL2 CTNNB1 PSMD2 GMFB CCT5 SPTAN1 DPYSL2 SPARC PGK1 ATP6AP1 MIF LY6E PPT1 CTSB PFKP PRPF19 FKBP1A SCD PGM2L1 HSP90AB1 SPRN ENO1 APOE BLCAP KCTD13 TTYH3 SOD2 AGT CRYM SLC2A1 CPLX1 CD24 ALG3 M6PR HSPA5 FADS2 CANX SPTBN2 PAFAH1B2 GNL3L CDK2AP1 TMEM132A GABRA3 RAN LAPTM4B NUTF2 ARL6IP1 CSE1L PSMB2 VKORC1L1 NALCN RABGGTB PSMC4 PFDN2 NRAS GDAP1 SLC15A2 TRAM1 STX6 YWHAZ	1	188	TTR HPCAL4 PTGDS MTCH1 RPS20 NDRG2 HPCA CSRP1 SHISA4 UCHL1 RAB1B CD81 RABAC1 SDHC TSPYL1 RPL11 RPLP2 PFN1 ITM2C UQCRB RND2 GNG3 KCNIP3 SYP GSTM1 GHITM NRN1 NOP10 HIGD2A CLTB DAD1 ALDOC GLRX CALM3 SLC1A1 GOT1 AP2M1 EIF4A2 FAIM2 GLYR1 TMX4 PITPNA CAPZB PFKM CCDC107 RPL35A TMEM47 MMD2 CLDND1 WSB2 AHCYL1 HINT1 GPR37L1 DYNLL1 LYNX1 ANXA6 SLC48A1 PTPRN MLLT11 NCALD CDIPT GRIA1 EEF2 ATP6V1G2 GSTM5 VKORC…	0
drug:P4479:biotin|cyclosporin A|phosphoprotein phosphatase inhibitor-up	16984	367	309	43	IGFBP1 PAH ENO1 LACTB2 GGH IGFBP3 FMO1 PGK1 CLDN2 PLAU ASS1 LRRC8D CCDC6 HSPD1 AHCY IVNS1ABP ATP6V0A4 NIT2 PTCD3 CTSB CTNNB1 TOMM20 IRF2BP2 HEXB AQP2 GJB2 PTGES3 OPLAH DHFR CHUK DDAH1 LAMP2 PARG CRYM ATP6AP2 OSBPL8 POLR2D NCL PLSCR2 MTHFD1 SLC34A3 HSPA1B ATP6V1A	1	169	HBA2 G6PC NDRG1 HBB HPD GSTA5 ERRFI1 SGK1 MT2A GSTO1 EPHX2 GSTA4 NCOA4 ACSM2A ALDH1A1 SKP1 AGXT2 COX7A2 NDUFA1 EHHADH RPL10 CMBL ALDOB COX4I1 GSTA1 PCK1 IAH1 OXCT1 COX7B RPS14 SUCLG2 OAT TPT1 SLC3A1 NAT8 TMBIM6 RPL5 NDUFA4 MGST3 GRHPR RPL27 CITED2 TMLHE FAU PXMP4 CAT ACSS2 RPS23 TMEM59 ATF4 RPL9 ACOX1 DECR1 CPEB4 UQCRB RPS20 GADD45A PIGR GPX3 BNIP3 TXNIP ACO2 TMEM140 SPINK1 FUCA1 UBB GLUL HERPUD1…	0
drug:P4478:biotin|phosphoprotein phosphatase inhibitor-dn	16984	370	289	48	CTSB FAM111A ASS1 AMACR CRYM LRP2 DAO HEXB PAH LYPLA1 RARRES1 ENO1 CDH16 HSPD1 IGF2R PROM1 IGFBP7 CCDC6 KMO COL3A1 SLC22A6 TNFRSF11B CXCL16 SPARC PSAT1 FCER1G LAMP2 HSPA5 MCCC2 NIT2 ATP6V1A RPL22L1 FN1 SLC39A8 GPI MFSD1 NCBP1 COL1A2 OSBPL8 SLC34A3 GNPDA1 LRRC58 GNS DHCR7 RENBP AQP2 DDAH1 SLC25A13	1	154	HBA2 HBB INMT GPX3 APOM NDRG1 ACY3 AKR1A1 OAT MGST3 OXCT1 FABP3 ACOX1 SGK1 RGN PDZK1 PCK1 SLC12A1 CHCHD10 COX6A1 FBP1 SPINK1 SLC25A5 ALDOB PGPEP1 TST ITM2B GSTA1 ACO2 PIGR SUCLG1 AASS UBC AKR7A3 EHHADH MEP1A AGXT2 TSC22D3 IFI27 RETSAT PEPD HPD TCN2 G6PC COX5B HGD FUCA1 CAT GRHPR SLC3A1 KCNJ16 COX7A2 CISD1 B2M CD81 NDUFB9 UGT2B15 CHCHD2 NDUFA11 UQCR10 CMBL ACMSD COX4I1 DCXR CD63 SLC16A7 ECI2 GSTO1…	0
drug:P4473:vincristine-dn	16984	396	339	44	DDAH1 HSP90B1 TNNC1 HSPA5 YWHAG TRIM72 PDP1 TNNI3 HOPX RPL3L ADK HNRNPH1 SMYD2 NKX2-5 SHANK3 CDH5 PNPO OLA1 RPL22L1 SLC25A22 SEC61G GPI FKBP1A CALU GRN SH3KBP1 VOPP1 VEGFA TUBA1B MCCC2 INHA PLCG1 MRPS35 PSMA7 PPA1 AMOTL2 SNRPG BST2 NPPA NFAT5 COL4A2 NRP1 TCP1 BZW2	1	197	FABP3 FTH1 RPS29 MYL3 MYL2 COX5B NDUFA10 SNX3 TXNIP ACADM VDAC2 RPL10 UQCRQ TPT1 EGR1 RPLP1 ID1 UBB NDRG4 DDX5 DMPK PINK1 MYBPC3 DYNLL1 UQCRC1 SGCB RPS11 DLST HSPB7 PHYH FHL2 DUSP1 FABP4 HSPB6 CIDEA SPARCL1 RPL23A ACADL COX8A GLRX5 ANO10 BCKDHB PODN ETFDH CST3 MGST3 COX7B HADHB HERPUD1 ATP1A2 ACAT1 DCAF11 BTG2 MYADM ACSF2 CHCHD10 RPS27A TSC22D3 CAV1 AQP7 CTNNA1 MRPS36 NDUFV1 COX4I1 PDHB LAMB2 ACT…	0
drug:P4472:vincaleukoblastine-up	16984	353	303	36	TCAP CSRP3 MYH6 DSP LRRC10 RAB3B IVNS1ABP IFITM3 TRIM72 GPC1 SH3KBP1 YWHAG LMCD1 HSPD1 RAPGEF5 S100A11 MIF SPTAN1 TNFRSF12A LRRC39 IRF2BP2 MRPL42 GPI IFITM1 TINAGL1 MFN1 OLA1 ADK PLEC DAB2 FLAD1 PSME4 GRB14 PAICS GLRX3 STAT3	1	174	UBC TXNIP PPP2R3A NDUFA3 MYOZ2 RCAN1 ACADL ACTB GSN PDK4 MYH7 EGLN3 CPT2 NDUFB3 ETFA NDUFS1 PRNP NDUFA8 XDH CRIP2 NDUFB11 NDUFS7 CRAT SLMAP NDUFB7 ALDH2 UQCRC1 NDUFA12 CCNG1 DECR1 FLNA OXCT1 SORBS2 FTH1 MYPN MYBPC3 DLST UQCR11 HSPB8 SGCG RCAN2 SMPX COX7B LAMB2 TMEM140 VEGFB ACO2 TSC22D3 JPH2 ACADVL UBA52 YJEFN3 COX7C RYR2 HERPUD1 RHOB ACTN2 UBB COX5A MYOM2 NDRG2 DHRS7C NFKBIA NDUFA2 SH3BGR TCTA M…	0
drug:P4475:biotin|cyclosporin A|phosphoprotein phosphatase inhibitor-up	16984	412	349	43	IGFBP1 CALB1 HMGN1 GGH AHCY TOMM20 HSP90B1 IGFBP3 ATP6V0A4 SPP1 HNRNPK MTHFD1 SEC61G CHDH RPN2 HES6 HNF1B CHUK EIF1AX SFXN1 CCDC6 M6PR SERBP1 COL4A2 CRYM HSPA5 ENO1 LRRC8D RPL22L1 PGK1 S100A10 XPOT HDAC2 COL4A1 ACSL4 RAD21 GNPNAT1 CLDN8 LAMP2 PREP IFI30 DHCR7 FCF1	1	192	HBA2 HBB MRFAP1 PHYH HSD17B4 AKR7A3 PECR UQCRC2 SKP1 COX7B SULT1A1 MSRB1 ACADM TPT1 ACO1 ERRFI1 NAT8 OAT EHHADH DPP4 RPL23A TMEM59 DNASE1 DBI SLC25A4 RPL34 SLC22A5 RPL10 CMBL SELENBP1 ACADL NDUFA4 IAH1 FAU RPL27 RPL27A UQCRH MEP1A OXCT1 RPS3A RPS20 ALDH1A1 SLC37A4 ARHGAP24 NCOA4 NDUFA3 SDHA MGST3 EEF1B2 CD59 RPS8 DECR1 DHRS7 ETFB RPS6 RPL18 SERPINC1 GSTO1 BTG1 NDUFC1 P4HB COL4A5 AGXT2 CRYL1 HADHB…	0
drug:P4474:(S)-colchicine-up	16984	408	357	52	CSRP3 TCAP DSP XIRP1 TNNI3 MYH6 LMCD1 NEBL YWHAG BZW2 RAB3B DUSP14 HPRT1 TFRC TNFRSF12A DSG2 IVNS1ABP VOPP1 TINAGL1 TOMM20 DNAJA4 DUSP27 LYPLA1 SOD2 PTGES3 POMP PSMD2 HSP90AB1 LRRC39 TMEM182 HNRNPK RPL22L1 SRP9 GRB14 ADK IFITM3 LRRC58 PHTF2 NCL ANKRD50 HSPD1 PLA2G2A PRPF19 CCT2 DYRK2 CCT4 PPAT TASP1 LAMP2 PSMD12 EIF1AX RAPGEF5	1	192	UBC TXNIP CALM2 MYOM2 MYL12A UQCRB APOBEC2 NDUFS1 ART3 ACADL NDUFB11 MYH7 SDHA PRNP TPT1 NDUFA3 DECR1 CNBP HSPB8 MDH1 VAPA SLMAP YJEFN3 PDK4 TPPP OXCT1 ETFA PPP2R3A NDUFA1 NDUFA4 NDUFB3 ETFB MT2A VEGFB NDUFS7 ACADVL RPS9 CPE HSPB6 RCAN1 RHOB SLC25A4 IDH3G RCAN2 BTG1 MGST3 PODN HSDL2 UQCRC2 BCKDHB NDUFV2 ALDH6A1 SLC25A3 NDUFB5 OAZ1 CD36 FLNC SDHD OCIAD1 SDHC RPS23 SDHB CPT2 CD59 SERINC1 MYBPC3 ACT…	0
drug:P265:5-amino-1-(5-phospho-D-ribosyl)imidazole-dn	16984	306	256	34	OSR2 CYB5B TMEM86A PLAU GRB14 IFITM3 NREP LUM BGN SPARC PCOLCE GPC1 INHA TGM2 CDK16 SFRP4 S100A10 SAMD9L ZBTB8B GPX8 LAMP2 MORF4L2 RPP25 VCAM1 HSD3B7 GRINA ITGB5 ADCK5 PDIA4 ARPC1B NPM1 SNX10 BPIFB4 COL4A1	1	143	NUPR1 EPHX1 FABP3 IFI27 ACSBG1 ME1 CSRP1 TULP2 SMARCA1 CKB EFHD1 COX14 ECHS1 CAV1 AOC3 LHCGR RPS25 TMEM100 MMD2 NDFIP1 DAD1 FAM214A WBP1L MYLK COX7C TIMM8B TST FAU ABHD4 ST5 RPS15 EIF3F ANAPC13 NDUFA3 AARD PDLIM4 NDUFA1 CD52 OLFML3 LEPROT UBL3 NSMCE1 PDGFRA ATP6V1E1 NDUFA6 RAB5C UQCRB TCF21 RERG GSTK1 ELOVL6 TSPO ACADSB PSME1 NDUFA12 TMBIM4 ETFB RNF10 SERF2 PLAC8 COX6B1 CAPNS1 VPS28 RGCC COX17 FC…	0
drug:P5308:curcumin|messenger RNA-dn	16984	327	291	41	TUBA1A SCD ENO1 BCAT1 MIF ATP6V1A CTSB PAFAH1B2 MTPN ATP6AP2 ATP6AP1 LAMP2 CNP YWHAG NSF HTR2C MFAP3L HSPA5 SLC2A1 SERBP1 SNX10 GMFB CCT2 HSP90AA1 CSNK2A1 GPI PSAT1 SRSF2 SSBP4 CCNT2 BZW1 TMEM185B RAN SNRPD1 ANP32E LEPROTL1 KPNA1 YME1L1 PRPS1 PPT1 SOD2	1	152	TUBA1A HBA2 UBB PLP1 COX8A DAD1 CALM1 RPLP1 NRSN1 CCK HPCAL4 RNF14 ATP6V0C CDC42 SYP SERPINI1 HPCA DYNLRB1 ACTB CST3 UQCR11 RPL9 EEF1A1 RPL10 ALDOC UBC MAT2A CCDC107 COX6A1 SYT4 OST4 ATXN7L3B ITM2C NDUFB2 DYNLL2 SNAP25 COX5A TMX4 TMEM47 GPM6B RABAC1 CD81 NDRG4 OCIAD1 RPS29 GPM6A CDIPT SLC25A11 CLDND1 SNCB NDUFB6 UCHL1 DUSP1 CFL2 PPP1CC ATP6V0D1 GNAI1 NDUFA3 NAPA RPS20 ABHD8 LYNX1 LDB2 GNG7 SGK1 A…	0
drug:P5303:curcumin|messenger RNA-dn	16984	372	338	51	TUBA1A ENO1 SCD MIF BCAT1 ATP6V1A ATP6AP1 CTSB YWHAG CNP NSF GMFB MTPN ATP6AP2 HTR2C LAMP2 RPL7 HSPA5 SLC6A1 CCT2 LY6E DPYSL2 SLC6A11 GPI KCTD13 CCT8 AGT SSBP4 NOP56 LAPTM4B PSAT1 CYB5B FADS2 THY1 RAN SNX10 ENTPD6 CPNE7 BLCAP CSNK2A1 SFXN1 SPRN TMEM185B SNRPD1 SLC25A22 GNL3L NCEH1 PFKP NRAS ITGBL1 NDRG3	1	174	TUBA1A UBB DAD1 COX8A RNF14 SYP RPLP1 ITM2C ATP6V0C HPCA UQCR11 ACTB ALDOC RPS29 CDC42 PLP1 GABRA5 UCHL1 CCK HBA2 SNAP25 COX6A1 SYT4 NDUFB2 IFI27 AP2M1 ATXN7L3B LIX1 CALM1 NEFL COX5A GHITM LRRTM1 DYNLRB1 NNAT TMX4 HPCAL4 ATP6V0D1 LYNX1 UBC CD81 CST3 OST4 RABAC1 MAT2A RPL10 OPCML OCIAD1 CLDND1 RPL9 COX4I1 SLC25A11 DYNLL2 NDRG4 GNAI1 ATP6V0E2 ABHD8 TAGLN3 NDUFV1 GNG3 NRSN1 CDIPT PRDX6 GPM6B NDUFB6 …	0
drug:P2629:4,4'-diaminodiphenylmethane|inhibitor|(2Z,3Z)-bis\{amino[(2-aminophenyl)sulfanyl]methylidene\}butanedinitrile-up	16984	320	298	39	OPN3 ALPP FBN1 NKX2-1 SLC38A4 GPNMB MEGF6 NTM GABRE PNMA2 LMCD1 TGFBI CFHR1 ISG15 SLC5A3 G6PD DAB2 SCD IFI16 SREBF1 IFIT3 IFITM3 ABCA7 TSGA10 NEBL NREP ARL4C CUL4B EFNA1 FASTKD1 PLXNA3 SPARC CD24 AGTPBP1 CD55 ARID5B FCHO1 LRRC37A2 SOX12	1	159	CYP1A1 AKR1C3 AKR1C2 ABCG2 ID4 LIMCH1 RNASE4 RGL1 SOCS2 SECTM1 NR3C1 ABCA8 SELENBP1 LARP6 PDE9A ID3 GNAI1 MT1E CA11 OLFML2A TXNIP LMO3 SULT1C2 CTSO EDIL3 GSTA4 DDX60 ACYP2 SMARCD3 SLC22A18 MVP TIPARP GSTM4 VIPR1 SLC25A1 AMT DENND3 PINK1 RCAN2 PDGFD NDRG4 ABHD4 SYNC ID1 PNRC1 TMEM140 LRRC23 PPP1R3C CYP39A1 ID2 ME1 SLC25A23 RAB4B SMAD7 RAB26 ACSL1 HCFC1R1 FUCA1 LSS F8 TCEA2 CLIP4 RABAC1 PCYOX1 RUND…	0
drug:P2489:4,4'-diaminodiphenylmethane|inhibitor|(2Z,3Z)-bis\{amino[(2-aminophenyl)sulfanyl]methylidene\}butanedinitrile-up	16984	305	282	43	ALPP OPN3 NKX2-1 PNMA2 FBN1 SLC38A4 CFHR1 CDH11 GABRE GPNMB NTM LMCD1 TRIB2 MEGF6 SCD SLC5A3 FADS2 DPYSL2 DAB2 G6PD PHTF1 WNT5A SPARC ISG15 NRP1 GNE DHCR7 FAT1 NREP S100A3 ABCA7 ARID5B POLM IFITM3 TNNT1 LPCAT1 TNS3 LIPG ASS1 SREBF1 CD55 TSGA10 PLXNA3	1	143	CYP1A1 AKR1C3 AKR1C2 ID4 RNASE4 RGL1 ABCG2 LARP6 ID1 EDIL3 ID3 SELENBP1 LSS SECTM1 SULT1C2 ABCA8 SLC25A1 LIMCH1 MVP NR3C1 SMARCD3 LMO3 CA11 OLFML2A GNAI1 PDE9A SLC22A18 AHNAK2 ACYP2 NDRG4 PINK1 CTSO SYNC PDGFD DENND3 RABAC1 GSTM4 VIPR1 RCAN2 ST3GAL5 SLC25A23 PCYOX1 PNRC1 TGFBR3 ACSL1 TGFB1I1 FHL1 DDX60 RAB4B GSTA4 CYP39A1 HCFC1R1 AMT MT1E ABHD4 PMP22 PPP1R3C HPGD MALL INSIG1 TIPARP ALDOC FUCA1 GL…	0
drug:P241:lignan|fatty acid-up	16984	263	205	27	FADS2 FABP7 HSPD1 LACTB2 SLCO1A2 FASN RBP4 UBD ACLY UGT2B10 MIOX APOC1 MIF PSMB2 KRT18 DDAH1 CTSB ZWINT RAN GLRX3 ACSL4 SLC38A4 SEC61G CRP PSMA1 TUBA1B CHUK	1	128	EHHADH ACOX1 DECR1 ACOT2 RETSAT CHCHD10 HADHB ME1 ALDH1A1 ALDH3A2 ADTRP FABP1 VNN1 EPHX2 CHCHD2 CPT2 PHYH ACADM ACADL HSDL2 HSD17B4 DBI AGMO HSD17B11 ETFB CAT EPHX1 ECI2 CREB3L3 CRAT GPD1 METTL7B SLC25A20 MGST3 GDE1 UBC NDUFA3 ACO1 LPCAT3 TM4SF4 ACAT1 NUDT7 COX4I1 TMEM14C SUCLG1 NDUFB9 ACADVL CMBL PDK4 RPL15 SAR1B NDUFC1 CD36 UBB PGRMC2 COX8A HMGCL SULT1C3 INMT HSD17B6 NUCB2 SMPDL3A HACL1 AKR7A2 …	0
drug:P240:lignan|fatty acid-up	16984	215	178	23	FABP7 FADS2 SLCO1A2 LACTB2 HSPD1 DDAH1 MIOX BST2 NIT2 KRT18 ACSL4 PSMA1 ACLY PTGES3 TFRC ZWINT MIPEP CYP17A1 PSMB2 GLRX3 CHUK SREBF1 PSMD2	1	107	EHHADH ACOX1 DECR1 ACOT2 RETSAT HADHB ALDH1A1 PHYH CHCHD10 ALDH3A2 ME1 ACADM VNN1 CPT2 ADTRP HSDL2 HSD17B4 FABP1 CREB3L3 ACADL GDE1 CRAT AGMO NDUFA3 MGST3 CHCHD2 GPD1 ECI2 HSD17B11 TMEM14C ETFB SUCLG1 LPCAT3 CMBL PDK4 SLC25A20 BCKDHB ACADVL ACO1 HMGCL PEX11A ACAT1 METTL7B NUDT7 DBI HDC HACL1 PGRMC2 EPHX2 NUCB2 EPHX1 PECR SAR1B CAT NDUFB9 HAGH GNMT CROT CYB5A TM4SF4 UBC TUBB2A GSTK1 CD36 NDUFC1 MT…	0
drug:P656:zinc oxide|nanoparticle-up	16984	510	375	62	APOE HP AHCY APOA2 C3 RBP4 MAT1A APOC1 AHSG SLC38A4 HAMP APOH PAH KNG1 FN1 CYP1A2 IGFBP1 SERPINF2 GLS2 PLG AGT C9 RGS16 LRRC61 HMGA1 F12 ABCB11 MARC1 IFITM3 AQP9 MIF PGK1 HAL DDAH1 SDS FETUB SLC22A1 HRG NUDT4 COL18A1 PROC POMT2 DPYS HSP90AB1 PGM2 BAAT UROC1 MTHFD1 ITIH2 PYGL SREBF1 NPC1 LIPC GNE SLC25A13 CFHR1 FGL1 RSC1A1 EBPL ADK LYPLA1 CYB5B	1	187	TTR GNMT PCK1 APOA1 GSTM1 TAT GOT1 PHYH HPD APOC3 ALDOB EEF1A1 CYB5A CDO1 ACOX1 ALDH1A1 ALDH1L1 PIGR GSTA3 G6PC NDRG2 CAT NDUFA4 ERRFI1 CTH TTC36 INMT APOB TPT1 ALDH2 BHMT2 INSIG1 RNASE4 FMO5 CHCHD2 PGRMC1 SLC2A2 STARD10 EPHX1 GSTK1 OAT REEP6 MDH1 KHK UBA52 AASS SCP2 HERPUD1 ANGPTL3 GSTM3 ACADM SOD1 CHCHD10 CROT CYP27A1 UBC SLC37A4 GSTA4 GPLD1 JUN GLUL COX5B B2M RPL10 ZFP36 PRDX6 ABCC2 SLC6A13 TM…	0
drug:P657:zinc oxide|nanoparticle-up	16984	536	395	68	HP APOE RBP4 AHCY MAT1A APOA2 C3 SLC38A4 AHSG HAMP PAH APOC1 APOH KNG1 FN1 C9 FETUB HRG AGT CYP1A2 SERPINF2 AQP9 MARC1 PLG IFITM3 GLS2 ABCB11 PGK1 POMT2 LAMP2 LRRC61 F12 BBOX1 FMO1 SLC22A1 MIF BAAT SLC25A13 DPYS DDAH1 PGM2 SDS CFHR1 PROC ITIH2 HAL HMGA1 ENO1 HSP90AA1 SOD2 HSD17B7 CPB2 CYB5B NUDT4 GNE CPN1 ARL6IP1 LYPLA1 PYGL ADK KMO FASN MTHFD1 NPC1 POMP HSP90AB1 FPGS NNMT	1	194	TTR APOA1 GNMT PCK1 HPD APOC3 INMT ALDOB PHYH EEF1A1 GSTM1 GOT1 GSTA3 MSMO1 CYB5A ACOX1 ALDH1A1 NDRG2 TAT CHCHD2 NDUFA4 CAT ANGPTL3 PIGR APOB KHK SCP2 SLC2A2 B2M AASS ALDH1L1 CDO1 RNASE4 TTC36 EPHX1 PGRMC1 GSTK1 REEP6 MDH1 ACADM SLC37A4 CTH ERRFI1 RPL10 ALDH2 HERPUD1 OAT FMO5 ALAS1 GFRA1 FBP1 CHCHD10 STARD10 SLC6A13 INSIG1 CYP27A1 GPLD1 MFSD2A METTL7B CLU UBA52 CROT SAR1B TPT1 HSD17B6 GSTA4 HSD17…	0
drug:P658:zinc oxide|nanoparticle-up	16984	521	374	64	APOE RBP4 AHCY HP APOA2 AHSG MAT1A SLC38A4 C3 PAH APOC1 APOH HAMP KNG1 AGT CYP1A2 FETUB FN1 C9 AQP9 SERPINF2 HRG GLS2 ABCB11 PGK1 POMT2 MARC1 LAMP2 F12 BBOX1 LRRC61 ITIH2 HMGA1 PLG SLC25A13 IFITM3 DDAH1 CFHR1 SLC22A1 DPYS SDS MIF BAAT PROC GNE SOD2 NPC1 NUDT4 HSD17B7 PGM2 ATP11C MAFB LYPLA1 ENO1 MTHFD1 FMO1 COL18A1 CPB2 ARL6IP1 PYGL CYB5B HAL HSP90AB1 ADK	1	188	TTR APOA1 GNMT PCK1 PHYH HPD INMT MSMO1 APOC3 TAT EEF1A1 GSTM1 CYB5A CDO1 ALDOB GSTA3 GOT1 ALDH1A1 ALAS1 ACOX1 NDUFA4 NDRG2 CAT B2M PIGR SCP2 APOB HERPUD1 ERRFI1 CYP7A1 CHCHD2 RNASE4 EPHX1 AASS ALDH1L1 FMO5 ACADM ANGPTL3 G6PC KHK SLC37A4 SLC2A2 TTC36 GSTK1 OAT GFRA1 PGRMC1 MDH1 TPT1 MFSD2A HSD17B6 REEP6 STARD10 GPLD1 RPL10 CROT ALDH2 CYP27A1 IDI1 ABCC2 CTH CHCHD10 UBE2D3 NDUFS3 SLC6A13 HINT1 GSTA…	0
drug:P4207:water|6alpha-methylprednisolone-up	16984	473	422	84	IL1A OLR1 CXCL1 EFTUD2 CCL3 ICAM1 BHLHE40 ANXA1 NXPH4 CCL7 ESM1 LIF PVR RPL22L1 HMGB3 ARL5B RNF43 GAD1 CACYBP MAP3K8 GPR4 PDRG1 LRRC61 MAGOH ANKRD13D PTGES RBP4 PHLDA1 PLAUR IER5 P2RX7 CHSY1 UBE2D1 PRPF40A ITGB8 CXCL16 TIPIN VEGFA GGH BCL6B HIVEP3 LGALS8 VASN FABP7 RAB15 SNRPF CD86 SBNO2 GUF1 RAD18 MRPL30 NFKBIE CD55 SYNPR C3AR1 S100A10 SNRPB2 DUSP14 TMEM119 LACTB2 CP PIGW CBX4 EEF1E1 GPRC5A TYW5…	0.999999	203	NR4A1 NR4A2 CCL2 NR4A3 CSRNP1 ATF3 COQ10B NFKBIA EGR1 EMP1 CARTPT KDM6B GADD45B BEX4 ERRFI1 ZFP36 PIM1 COX7B BTG2 ADAMTS1 KLF4 SST GMPR ENPP6 CBR1 COX7A2 DUSP5 SERTAD4 PER1 PBX3 PNRC1 SOCS3 ARID5A SIK1 COX7C TIMM8B PPP1R15A GSTM5 EHHADH ARC NECAB1 KCNE4 RPL26 TAC1 EID3 HSCB COX7A2L ZFP36L1 MRPS18C EGR3 GADD45A ACSF2 CREM AARD JUN TIMP3 SAR1B NDUFB11 DPT NDUFA2 PNOC ASPA CFL2 KCNIP4 MED31 NDUFA4 N…	0
drug:P2787:hormone-up	16984	424	357	43	ACLY UCP1 ACACA SOD2 ENO1 CTSB APOC1 PPA1 HSPA9 FMO1 HK2 HP PYGL ANXA2 S100A11 C3 BGN SLC24A3 CYB5B COL4A1 TGM2 YWHAG ELN SFXN1 MRAP ATP2A2 MRPL42 HSPD1 COL4A2 MRPL30 TIMM17A MLXIPL SLC25A19 SNX10 EIF4EBP1 TMEM79 GRINA NPPA NRP1 MRPL50 YWHAB PSMA4 FASN	1	201	CIDEA CFD IFI27 FTH1 COX8A UQCR10 COX6A1 NDUFA4 NDUFB8 COX5B COX6B1 CHCHD10 COX7A1 UQCRH COX4I1 ACO2 PNPLA2 COX5A NDUFA1 UQCR11 HADHB PDK4 CDO1 COX7C RPLP1 ETFB ETFA UBB ACADM COX17 UQCRC2 NDUFA6 ACADVL IDH3G NDUFV1 ELOVL6 CAV1 ACSL5 UQCRC1 GPD1 ACTA2 UQCRB NDUFS7 NDUFA3 SOD1 CST3 RPS20 NDUFA10 NDUFV2 RPS14 NDUFA2 ECI1 SLC25A5 RPL9 FABP3 AGPAT2 S100A1 CIDEC ECHS1 UBC CHPT1 DBI HIGD2A AOC3 ALDH2 C…	0
drug:P2786:hormone-up	16984	331	280	37	UCP1 ACLY ACACA NPPA ENO1 BPIFA1 SOD2 APOC1 FMO1 PPA1 ATP2A2 SLC24A3 HSPA9 CYB5B HP MYBPHL NRP1 PYGL MRAP HSPD1 COL4A1 TGM2 GPX8 MRPL42 SFXN1 MLXIPL FASN ELN COL4A2 MYH6 EIF4EBP1 SLC25A19 C3 PDP2 HK2 TMEM79 MRPL50	1	166	CIDEA CFD ELOVL6 IFI27 CDO1 COX6A1 PNPLA2 COX7A1 COX6B1 ACADVL AGPAT2 ACO2 MYL4 ACTA2 COX8A ACADM GPD1 CHPT1 LETMD1 UQCRH HADHB NDUFA1 UQCRC2 FABP3 S100A1 CIDEC ETFB ETFA CAV1 DLST ECI1 ECHS1 COX7C SOD1 ACSL1 IDH3G ABCD3 NDUFB8 UQCRC1 ACSL5 PDK4 CHCHD10 NDUFA4 AOC3 NDUFA6 COX4I1 CPT2 COX17 NDUFA12 MYH11 COX5A NDUFV1 UQCR11 CSRP2 ME1 NDUFV2 COX5B GSTO1 AHCYL1 NDUFA10 PLIN4 MYLK NDUFC1 NDUFS3 SLC25…	0
drug:P5347:organophosphorus compound|ethyl-up	16984	301	261	39	TNNI3 IFITM3 TNNC1 TGFBI BAMBI SPARC COL5A2 RAI14 AMIGO2 COL4A1 AGT CD24 GPI RCN1 ADD3 TUBA1A ASS1 XPOT PSAT1 MARCKSL1 LAPTM4B MIF CPVL ECM1 CREG1 SH3KBP1 LYPLA1 FZD2 EIF4EBP1 ITGAV GPX8 FKBP9 RPN2 FN1 YWHAG COL4A2 LUM DDR1 MPLKIP	1	147	MYL2 MYL4 CRYAB MYL3 MLLT11 TP53I3 PLN MYH7 DCAF6 SRPX FHL2 SMPX FABP3 MYL9 HSPB3 PKIG ABLIM1 MYOZ2 SH3BGR MYBPC3 ARL6IP5 LRRC49 CSRP2 GABARAP NDUFB9 COL21A1 PRDX5 TIMP3 DHRS9 SLC25A3 CKM RPL13A CHCHD10 UNC45B APOBEC2 ARMCX2 ATF4 UQCR10 SRP14 CNN1 NDUFA3 UQCRQ POPDC2 ALDH2 NDUFA4 FITM1 COX14 CD81 NDUFS2 PSME1 HIGD2A GLRX SLC27A6 MSMO1 GYG1 DECR1 ISCU COX7B BVES SERF2 ITM2B NDUFB11 CDIPT CUTA COX8…	0
drug:P3578:dimethyl sulfoxide|glycine betaine|inhibitor-up	16984	313	235	21	PTPRE CTSB GRINA ARL6IP1 DCAF7 METTL3 SQLE HSP90AB1 RABGGTB GRN CTNNB1 SOD2 GLG1 TRAP1 COX19 NOP56 DNTTIP1 POLR1C TMEM185B OGFR ATP6AP1	1	132	UBC RPS9 COX6A1 UBB FAU RPL37A RPS5 RPL10 RPS8 EIF3F MCL1 HIGD2A COX4I1 UQCR11 COX7A2L RPL23A SOD1 WBP2 SNN UQCRH CD81 RPL3 RPL35A RPL18 MSMO1 EEF1B2 NDUFA7 COX7C RPL34 MYL6 ALDH2 SSR4 RPL5 ATF4 RPS6 RPS15 EGR1 RPL13A NDUFA6 COX14 ATP6V1E1 RPS20 RPL31 FAM214A NDFIP1 NDUFV1 TBCA EEF2 SRSF5 STARD4 TMBIM6 ENSA UBXN1 PTTG1IP EIF3K MRPL33 TXNIP HBP1 SRP14 HINT2 NDUFA2 MRPL52 NDUFA12 MPND NDUFA1 SERINC…	0
drug:P2996:risperidone|haloperidol-up	16984	519	454	55	ZWINT YWHAG DNM1 VSNL1 TUBA1B ATP6V1A ARPC5 STMN1 CLSTN1 CRYM MIF DPYSL2 DDN YWHAZ SPTAN1 PGM2L1 CTSB THY1 ENO1 YWHAB ATP6AP1 BCAT1 NSF MORF4L2 USP14 LY6E ATP6V1C1 SLC30A3 CLTC OLA1 GRINA RPL22L1 PRKCG PTGES3 FABP7 RAN GPI ATP6AP2 CPNE7 NRCAM SLC6A1 HPRT1 SLC25A22 ACSL4 MARCKSL1 DNAJA1 CANX RCN2 KIFC2 RAPGEF5 GNL3L HNRNPK PGBD5 HSP90B1 SET	1	233	OLFM1 SPARCL1 TUBB2A NPTX1 ITM2B CCK CPE PRNP ATP6V0C RNF14 ACTB FGF13 NNAT RTN1 UCHL1 TAGLN3 FTH1 NRN1 CST3 GABRA1 CALM3 STMN2 SYP MT3 AP2M1 ATP1A2 UBB CPNE6 PEBP1 NELL2 GNG3 RNASEK SLC25A4 MGST3 ATP6V0D1 SERPINI1 DYNLL1 S100B CFL1 MRFAP1 SNCA NCALD ATP6V1E1 GABRA5 SCG2 COX4I1 NEFL MLLT11 NDFIP1 SLC17A7 CALM2 SNAP25 GPM6A RPL27A NDRG2 SNCB VAPA OPCML WASF1 SKP1 SERINC1 TPPP CDO1 CALM1 TSPAN7 LY6…	0
drug:P2994:risperidone|haloperidol|Xanthomatosis, Cerebrotendinous-up	16984	538	467	66	ZWINT ARPC5 TUBA1B CRYM FKBP1A MOBP FABP7 DDN YWHAB DNM1 ATP6V1A GRINA YWHAZ FOXG1 BCAT1 CNP PRKCG ATP6AP1 CPNE7 PSAT1 NSF SLC24A2 BCL11B ENO1 MIF THY1 MAP2K1 CTSB YWHAG MORF4L2 OLA1 PTGES3 CLTC HMGN1 PSMB2 HSP90B1 USP14 ATP6AP2 HSPA5 DOCK4 SPARC ICAM5 GGH ATP6V1C1 PSMA7 RAN CANX GPI OPALIN NEBL LAMP2 SKIL HNRNPK NCL RPL22L1 PPP3R1 MARCKSL1 KCND2 COPA RNF182 HSPH1 SLC6A1 BHLHE41 SPTAN1 HSPD1 DNAJ…	1	232	ACTB PLP1 HPCA NNAT TTR ITM2B FTH1 CPE UBB DYNLL1 SCG2 TUBB2A CPNE6 CST3 NDRG4 PRNP NPTX1 SPARCL1 CAMK2B RNASEK FGF13 RPS23 UCHL1 S100B NDRG2 PEBP1 RHOB MRFAP1 TPT1 OLFM1 ATP6V0C RPL27A ENPP2 CALY QDPR PPP1CC ITM2C MT3 ATP1A2 PRDX2 SNCA NELL2 GABRA5 DBI CHCHD10 SLC25A4 SLC25A5 RPS11 NDUFA4 RTN4 RPL5 WASF1 MGST3 CD81 RPS9 GRIA2 FAU SPON1 RTN1 CFL1 COX5B SLC22A17 ARPC2 COX8A COX4I1 NDUFA1 APLP1 UQC…	0
drug:P2995:haloperidol|hydridoaluminium|risperidone-up	16984	512	446	59	ZWINT YWHAG DNM1 VSNL1 TUBA1B ARPC5 ATP6V1A CLSTN1 DDN CRYM MIF DPYSL2 PGM2L1 SPTAN1 YWHAZ STMN1 USP14 YWHAB CTSB THY1 MORF4L2 SLC30A3 ATP6AP1 ATP6V1C1 LY6E NSF OLA1 CLTC SLC24A2 PRKCG RPL22L1 GRINA PTGES3 ENO1 NRCAM CPNE7 ATP6AP2 SLC6A1 FABP7 RAN ACSL4 SLC25A22 HPRT1 GPI KIFC2 DNAJA1 CHST1 RAPGEF5 ILDR2 FOXG1 CANX FKBP1A GNL3L MARCKSL1 HNRNPK PGBD5 MAL2 SET ICAM5	1	227	OLFM1 SPARCL1 NPTX1 TUBB2A CPE ITM2B CCK PRNP FGF13 FTH1 RNF14 ACTB ATP6V0C UCHL1 TAGLN3 NRN1 STMN2 GABRA1 NNAT CPNE6 RTN1 NELL2 SYP MT3 UBB CALM3 AP2M1 RNASEK CST3 DYNLL1 SERPINI1 PEBP1 SNAP25 MGST3 HBA2 HBB NEFL SNCA ATP6V0D1 GNG3 GABRA5 ATP1A2 SLC25A4 CFL1 MRFAP1 ATP6V1E1 SCG2 NDFIP1 GPM6A NCALD SLC17A7 CALM2 WASF1 MLLT11 OPCML S100B SKP1 TPPP MAP1B GRIA2 CALM1 SERINC1 COX4I1 NRXN1 VAPA CDO1 S…	0
drug:P26:dimethyl sulfoxide|Insulin-up	16984	425	369	66	ACLY FABP7 FASN DHCR7 RBP4 FADS2 APOC1 HMGA1 ABCA1 SPARC ASS1 G6PD HSPA5 SREBF1 SCD IFI6 GPNMB ASAH1 SQLE ANXA2 POLD2 COL4A1 CANX STARD7 NID2 ACACA PSAT1 C3 GOLPH3 HSPA9 SERPINH1 HSPA1B LUM TUBB EXOSC8 CYB5B POLR2B SPTAN1 TCP1 TMEM123 UBQLN1 ITIH1 KLHL11 CLMN GSK3B KIF5B OLFM2 TNPO1 TSPAN14 MPZL1 LACTB2 EIF4G1 RCN1 IARS2 SLFN5 CLCA2 MAP6D1 P4HA1 FAM189B BHLHE40 CHD4 ACTR2 SUGP2 YWHAG XPOT AZIN1	1	176	LPCAT3 CCR10 ME1 ELOVL6 ACSS2 ACSL5 SLC2A5 RHOA MVD RETSAT ACSL1 MSMO1 INSIG1 UBC SLC25A1 IDI1 PLIN2 PDK4 GPX4 ACADVL FAM49A TMEM38A HADHA CFD FABP3 TXNIP PPP1CC FABP4 LSS CHP1 MME CHL1 CD63 LIPA HADH NR1H3 EPHX1 PEPD CYB5A MKNK2 ACO1 MID1IP1 SELENBP1 TSKU PMP22 PEBP1 HADHB TMBIM1 GPD1 TMBIM6 METTL7A PDK1 ADA TST ACOT2 MYL9 RAB1A ARL6IP5 AOC3 AHNAK CNBP FXYD1 MAP1B PRDX5 PCYOX1 RNASE1 AQP7 ACADM …	0
drug:P2503:4,4'-diaminodiphenylmethane|dimethyl sulfoxide|inhibitor|(2Z,3Z)-bis\{amino[(2-aminophenyl)sulfanyl]methylidene\}butanedinitrile-up	16984	290	268	41	ALPP OPN3 NKX2-1 FBN1 PNMA2 SLC38A4 CFHR1 MEGF6 GPNMB GABRE CDH11 LMCD1 NTM TRIB2 SCD FADS2 SLC5A3 DAB2 G6PD PHTF1 DPYSL2 WNT5A NRP1 SPARC FAT1 GNE DHCR7 ISG15 ABCA7 POLM ARID5B NREP SREBF1 TNNT1 APOC1 ZNF264 LPCAT1 ASS1 TNS3 TSGA10 LIPG	1	138	CYP1A1 AKR1C3 AKR1C2 ID4 RNASE4 ABCG2 RGL1 LARP6 ID1 EDIL3 ID3 LSS SECTM1 SELENBP1 SULT1C2 SLC25A1 NR3C1 LIMCH1 MVP OLFML2A LMO3 SMARCD3 ABCA8 CA11 SLC22A18 AHNAK2 ACYP2 NDRG4 GNAI1 PINK1 CTSO DENND3 SYNC RABAC1 PDGFD RCAN2 PNRC1 PDE9A AMT SLC25A23 ABHD4 GSTM4 VIPR1 RAB4B ACSL1 PCYOX1 CYP39A1 FHL1 TGFB1I1 GSTA4 HCFC1R1 PPP1R3C TGFBR3 DDX60 ST3GAL5 HPGD INSIG1 MT1E TMEM140 MALL ALDOC TIPARP FUCA1 …	0
drug:P282:genistein|daidzein|dimethyl sulfoxide-up	16984	307	268	34	TIMP1 HOXC8 SCD MSX1 SERPINE2 GREM1 SEC61G TFRC HMGN1 TRMT5 IFITM3 CARHSP1 NNMT HSP90B1 DRAM1 SPARC GTF3A TUBA1C SNAI2 PSAT1 THY1 DPM1 RFTN1 PIK3R2 LUM PPA1 COL1A1 PDGFRB MAFB TMEM119 ACTR2 CDK4 GNPDA1 TUBB3	1	145	RPS20 MT2A ID3 TOMM7 RPS3A TPT1 RPS25 RPS27L MYL12A RPS6 RPS11 RPS29 RPL15 ACTB TXNIP SLC25A5 RPL27 RPS5 ID2 GPX4 RPS9 OST4 UQCRQ COX8A RPL13A RPL3 HMOX1 RPL31 COMMD6 JUND ACTA2 HINT1 SLIRP MYL6 EEF2 NDUFA4 RPL36AL FTH1 TXNDC17 RPS27A CCNG1 WBP2 RPS13 NDUFB2 RHOA STMN2 AKR1C3 B2M RPS15A ATP6V1G1 GTF2H5 GLRX5 RPL10A NDUFB3 RPL35A PFDN5 SEC61B COX5B UQCRHL EEF1A1 PSMB6 TWIST2 LSM3 RPL18 SERF2 SSU72…	0
drug:P289:daidzein|genistein|dimethyl sulfoxide-up	16984	285	243	29	S100A10 THY1 SCD GNPDA1 DRAM1 TMEM119 IL18 MSX1 ZMAT3 MAFB CDAN1 PDGFRB LMCD1 HOXC8 LRRC32 ARID5B STAT1 PABPC1 NNMT LY6E ANXA2 PPA1 CPNE3 ZNF486 TNFRSF19 SNAI2 HSD17B7 SRSF6 C21ORF58	1	133	TXNIP EEF1A1 GPX4 RPS8 RPS25 ZFP36 RPL13A RPS11 JUND TOMM7 RPL15 HMOX1 RPL31 RPS29 TPT1 RPS3A CDKN2AIPNL COMMD6 OST4 RPS13 RPL18A RPL11 WBP2 CCNG1 FTH1 PMP22 RHOQ ID2 OAZ1 RPL4 RPL3 SLC16A12 RPS20 RPL26 COX7C RPL35A RPS9 EEF2 RPS6 CIRBP UQCRQ STMN2 AKR1C3 ID3 NCOA4 GLRX FOS BTG1 CCNI GTF2H5 RPL5 TWIST2 RPS27A PDE4C AVPI1 RPS14 REEP5 EIF3L EIF4B SERF2 RING1 HCFC1R1 PEPD TMEM47 HIGD2A MXD4 AKR7A2 G…	0
drug:P4036:retinoic acid-dn	16984	569	518	116	SERPINE2 IGFBP7 TUBA1B COL1A2 TGFBI TIMP1 COL1A1 TUBA1A THBS2 GREM1 COL5A1 TUBA1C S100A10 SEC61G SPARC COL4A1 COL6A3 BGN TUBB DAB2 DPYSL2 PGK1 PLOD1 IFITM3 COL5A2 TNFRSF11B ITGA11 LOX LUM SERPINH1 MYH9 DKK1 STC2 COL3A1 MIF ENO1 MORF4L2 ARID5B IGFBP3 NNMT SRSF9 CTHRC1 PABPC1 CALU C5ORF46 FNDC3B PPP1R14B NUAK1 THY1 STRAP SERPINE1 VASN PCOLCE NREP CCT2 TPD52L2 NOX4 DNAJB11 NAA38 MAPRE1 RAI14 CDH11 F…	0.999951	227	EEF1A1 ACTA2 TPT1 RPS25 RPS29 ACTB OAZ1 RPL27 RPS27A TUBA1A CD81 RPS15A RPS20 RPS11 IGFBP5 RPL11 MYL6 RPS6 RGS4 UBA52 RPS14 RPS24 SERF2 RPL31 RPL36AL COX4I1 RPS13 DCN NDUFA1 PTX3 FLNC RPLP2 BNIP3 RABAC1 HSPB6 TXNIP SOD1 COX7A2 ADAMTS1 RPS5 PPP1R3C CFL1 TOMM7 CCNI CSRP2 MYL12A UBC RPL35A CAP1 DNAJC28 UBB RPS9 B2M MFAP4 EMP3 FAU RHOA DAD1 PALLD CALM3 CSRP1 COX5B NME4 KLF2 NDUFA4 TMEM59 P4HB UCHL1 S…	1.11022e-16
drug:P2055:pyrrolidine-up	16984	335	289	51	IGFBP7 COL1A2 DIO1 DAB2 PMEPA1 DAO CTSB HSPD1 UCP1 ACTR2 APOE DDAH1 IVNS1ABP MIOX PAH SLC22A6 ALOX15 S100A11 ATP6AP2 NUAK2 SPARC SPP1 FMO1 GPI NREP PLAU LAMP2 NIT2 PSMA7 CDH16 PLSCR2 CD24 SFRP2 KRT7 MTDH MTHFD1 IGF2R HSPA5 ALX1 MMP9 GREM1 SLC34A3 MMP14 FKBP9 OPLAH COL4A1 COL15A1 CPD PSMD11 SLC5A3 ANXA1	0.999999	144	GPX3 ALDOB FTH1 SLC3A1 HBB PCK1 ITM2B HBA1 DBI SOD1 ATP6V0C PTTG1IP G6PC FBP1 SLC25A5 SULT1C2 B2M AGXT2 COX8A GRHPR TEX264 DPT GSTO1 UQCRH SDHC CDC42 ATP6V0E1 GSTA2 SMOC2 COX6A1 ECI1 SOSTDC1 DCN KLF9 SKP1 ACADL MAL MDH1 ACSM2A CISD1 AKR1A1 SGK1 CPQ HADH HPD MEP1A EFHD1 CRYAB BPHL TMBIM6 ALDH1A1 SLC22A5 CYB5A PEPD DNASE1 ARHGAP24 ACSL1 CTNNA1 ACADM OAZ1 PC NDUFB9 RTN4 HSD17B4 CCNI SLC1A1 CMBL CD81…	1.11022e-16
drug:P2850:hormone-dn	16984	475	370	70	APOA2 APOC1 APOE MAT1A HP AHSG ASS1 CYP1A2 C3 ITIH1 HSD3B7 ASGR1 CYB5B MIF CYP7B1 AQP9 IFITM3 APOF CRP SLC22A1 ADK SERPINA10 C4B HAMP F2 SERPINF2 PROC UROC1 FETUB HAL POMP GLS2 DDAH1 RPN2 KNG1 GRB7 RGS16 GLDC PPA1 ARL6IP1 IGF1 SDS CP HSPA9 ACLY SOD2 GRINA AGT PLG NNMT F12 SLC17A2 LAMP2 ITIH2 ABCB11 HSD17B7 GSPT1 FMO1 CPB2 SFXN1 SERPINA6 RCL1 APOH PSMA4 GM2A PDIA3 CPN1 PROZ EBPL PYGL	0.999999	174	APOA1 APOC3 TTR FGA ALDH2 CLU ERRFI1 FTH1 TMBIM6 GNMT RPLP1 CHCHD10 G6PC OAT C8G GSTZ1 P4HB INMT NDUFA4 RARRES2 SOD1 UBB ANG RNASE4 ABHD14B RPL36AL UQCR10 RETSAT ACSL5 HERPUD1 HAAO ABCD3 HPD CYP27A1 GLYAT ETFB COX5B EPHX1 CCS ALDOB RPS27L CDO1 HSD17B4 UQCR11 COX6A1 F10 RPS20 TTC36 KHK GRHPR UQCRH SLC25A5 PARK7 RPL9 PTTG1IP COX8A COX6B1 COX7C ALAS1 SLC6A13 NRN1 NDUFA6 WBP2 COX4I1 GSTK1 SELENBP1 FB…	1.11022e-16
drug:P3668:thioredoxin|protein polypeptide chain|glutathione|serine|metabolite|epoxide|inhibitor|protein|cytochrome P450|cytochrome|hapten-up	16984	348	288	44	STAC3 HRG ASS1 PLG RBP4 FETUB SLC38A4 MAT1A GLS2 APOC1 PAH AHCY AMACR HSPD1 RAN NNMT SDS FAM111A PPA1 CTSB FKBP4 SERPINA6 HAL ACLY KMO SERBP1 NCL NIT2 TRAM1 MIF TTPA GNPNAT1 TUBA1B BBOX1 HMGN1 DHCR7 HSP90AB1 RCL1 MORF4L2 AGT CPB2 MIOX SHMT2 MCCC2	1	144	GSTA5 HPD BHMT NDRG2 PHYH RETSAT GNMT INSIG1 QDPR SULT1A1 RPL18 ALDH1L1 HSD17B6 ANGPTL3 RPS3A RPL4 CYB5A ALDH3A2 MOCS2 PEBP1 CHCHD10 AADAC MID1IP1 NDUFB5 NDUFA1 TSPAN31 RPL6 RPL31 ACSM1 GSTZ1 TST HSD17B11 HEBP1 SLC25A3 GSTM1 SLC25A25 TAT G6PC RPS23 HGD COX7A2 PECR EPHX1 RPS11 PODN GHITM GPT CHPT1 CDO1 ETFB PMVK GSTA1 RPS8 ALDOB UQCRB RCAN1 BHMT2 ERRFI1 ETFDH GSTO1 AKR1A1 SOD1 PGRMC1 GRHPR NDUFB9 …	1.11022e-16
drug:P2344:ethanol-up	16984	249	221	33	CP GJB2 IGFBP7 HSPD1 SFXN1 PPA1 PDIA3 GSPT1 RCL1 GLS2 GLDC PSME4 EBPL PTPRE TRAM1 GM2A DPAGT1 PDP2 TMEM38B COPB2 MTDH PSMB2 GNS PTBP1 ELAVL1 CHUK CLDN12 NOP58 TBRG4 ITGB5 TTC39C FPGS GTF2F2	1	118	GSTM1 CHCHD10 ALDH2 ERRFI1 TMBIM6 STARD10 GSTZ1 RNASE4 EPHX1 SCP2 RPS27L BLVRB C8G ETFB SLC25A5 ABHD14B RPL36AL DBI ETFA VKORC1 PTTG1IP GPT RETSAT NDUFA4 CCS CHP1 STBD1 SLC6A13 TMEM14C GRHPR SLC25A15 EPHX2 XBP1 GSTK1 ECHS1 ACADVL GSTO1 ALDH1L1 ENTPD5 UQCR10 RPL37A HINT1 HADHB IQGAP2 ALAD SUCLG2 HBP1 ADH5 ALDH6A1 HMGCL CSRP2 HSPB8 ACSS2 CCDC107 PSME1 ACTB EEF1B2 TMEM120A EEF1D SURF4 BTG1 RPS9 EDF1…	1.11022e-16
drug:P2683:metformin-dn	16984	295	252	38	COL4A1 S100A11 COL1A1 GRINA COL5A1 COL4A2 TNNI2 SFXN1 NNMT BGN CYB5B SPARC EIF4EBP1 YWHAB SLC1A3 DRAM1 COL15A1 ANXA2 SOD2 FKBP9 ATP2A1 SERPINH1 MRAP THBS2 RPN2 TNNC1 TIMM17A UACA BLCAP CCT4 MRPL30 NRP1 TNNT1 UCP1 GM2A ARGLU1 ATXN2 PCOLCE	1	130	CFD PLIN4 PNPLA2 IFI27 CAV1 RPS14 COX4I1 RPS8 BAG1 EMP1 COX6B1 CIDEC NDUFA4 RPL9 NDUFA3 RPS29 TXNIP MYL6 CDO1 UQCR11 RPL32 RPL34 TMEM120A PRNP ACADM UQCRH MKNK2 RPS11 RPL10A NDN NDUFA2 RPL3 UQCR10 MYL2 MAGED2 NDUFA1 RGCC NDUFV1 FCGRT NDUFV2 ETFB COX7A1 PPP1R1A NDUFS7 EIF3F DPT NDUFA10 RPS25 RPS9 NUPR1 NDUFA7 UQCRC2 RPLP1 COX14 MRPL33 TSPO RPS5 CTNNA1 NDUFA6 CLDN5 S100A1 PRELP RABAC1 NDUFB3 MFN2 I…	1.11022e-16
drug:P5179:toxin-dn	16984	311	270	33	ASS1 MIF PABPC3 C4ORF46 ADD3 PSAT1 RLIM EBPL HEXB AMOTL2 CCNB1IP1 RPN2 TOMM20 TNNT1 XPOT CREG1 TNNC1 PLK2 TRIB3 PODXL CLDN7 ENC1 TSPAN6 IFI6 SHMT2 C19ORF48 FBL NOB1 CDK7 NIT2 SRSF9 TATDN1 IFITM3	1	137	S100P ID1 RPS8 ID2 RPL13A RPL4 RPL3 EEF1B2 ATF4 RPL36 MT2A MSMO1 RPL29 ITM2B TXNIP RPL32 EEF2 MT1X RPL11 RPS25 GPX4 RPS29 SLC25A6 CCNG1 RPS20 MT1E PCK2 IFI27 MT1F RSL24D1 DBI TMEM14C TBCA PRDX5 COX8A NQO1 PFDN5 RPS5 GABARAP UBA52 CHMP2A RPL9 ARRDC4 AKR1C3 HADHB RPL27 PSME1 TST UBL5 OST4 ALDOC HINT2 COX7C CAMLG COX7A2L CHMP5 UQCRH COX6B1 EDF1 CUTA KLF10 UQCRQ ARL6IP5 NDUFB11 C12ORF57 ETFB C4ORF3 P…	1.11022e-16
drug:P5550:inhibitor-up	16984	313	254	38	GAD1 SLC39A10 CPLX1 COCH THY1 LAMP5 PTTG1 DDIT4L MAP2K1 TCP1 PCNA PPP1R1B CBLN4 HSPH1 FABP7 SHANK3 RNF44 MBOAT2 ENC1 RNF145 S100A5 PPP3CA PPME1 LRP11 ARL6IP1 KCNJ10 HNRNPA3 PSMA4 NLK KCNAB3 HOMER1 C1QBP FAT1 CACYBP TBCE CAMK2N2 SHROOM2 SYNDIG1	1	131	NEFM RTN1 PENK GOT1 ITPR1 RHOB CKB NEFL RGS4 OSBPL1A PPP1CC ATP6V1D RPL23A LMO3 COX6A1 B2M CHCHD10 NRN1 EIF4A2 GNG3 RPS14 AP4S1 UQCRC2 SDHB PDE1B PAIP2 DCTN3 GABRA1 SCN4B VTI1B COX4I1 GHITM CAP2 SCG2 TMCC2 NEGR1 FBXW7 VDAC2 NDUFA6 RASL11B UBL3 CSDE1 SCG5 SNX3 AURKAIP1 FRRS1L NGEF SYNE1 ATP2B2 COX6B1 AHCYL1 SRSF5 UQCRH NACA NDUFA1 ITFG1 CACNA2D3 RPS13 SLC2A13 ATL1 NDUFC1 PRNP HIGD2A PVALB VPS28 HP…	1.11022e-16
drug:P4805:ochratoxin A-dn	16984	314	249	40	FASN DHCR7 KNG1 POMP APOH GRINA AHCY APOE ENO1 IGFBP1 GRN HSD3B7 RPN2 HP ASGR1 AHSG DPP3 SLCO1A2 PAICS KCTD13 MMP14 SREBF1 PDAP1 DAO PSMD11 YWHAB TUBA1B TRAP1 SLC12A7 FKBP1A SLC6A6 ABCB11 LEMD2 MTHFD1 G6PD SRD5A1 FGFR4 CALU SLC22A1 FKBP4	1	128	PLIN2 UBC EPHX1 FBP1 APOM KHK FAU SLC25A1 CRIP2 G6PC RPS9 PXMP2 CTH GSTM1 ATP6V0C COX8A METTL7B RPLP2 NDUFA3 NDUFB4 AKR7A3 COX4I1 NUCB1 NDRG2 ALDH1L1 CLU NDUFB9 MST1 HPD APOC3 COX7A2 F10 RPS14 TAT SLC22A7 OAZ1 GSTA1 NDUFB2 UBA52 ABCD3 CYB5A CST3 CITED2 HBA2 GAMT TTC36 RPL27A DYNLRB1 MARC2 CAPNS1 RPL18A RPL11 GALM GSTK1 UBE2J2 NDUFS7 DCAF11 ALDH1A1 SOD1 TPST2 LGALS9 PC RPL10A NDUFS5 NDUFA6 P4HB GS…	2.22045e-16
drug:P4867:aflatoxin B1|mycotoxin|dimethyl sulfoxide-up	16984	540	462	76	S100A2 RBP4 HP TUBA1B AGT NNMT FDXR APOH GDF15 SULF2 GPI HES7 CD70 IFITM5 EBNA1BP2 IFITM3 TM4SF1 FGL1 DDB2 GPC1 CPB2 PDIA4 ANKK1 RPL22L1 TYMS DAP3 MCM7 ACTL8 IGFBP7 TUBA1C CCT4 C1QBP SPP1 PPP1R35 TK1 BAMBI GRN GALR3 TIMP1 CCT2 CLTC OR5AP2 FN1 TRIP6 UGT2B4 SSRP1 NCOR2 NUP62 FBL LAMB1 GGCT S100A10 CCZ1B IL13RA2 PLOD3 IER5 NOP16 PCNA C6ORF62 CCT3 GABRE BST2 SEC61G BCAP31 USP9X HNRNPA2B1 SLC39A8 HMGN…	1	206	FABP1 AKR1B10 APOC3 RPL37A OAZ1 RPL3 GSN GSTA2 RPS20 TTR RPS23 UBB RPLP1 AKR1C3 FTH1 RPLP2 ETFB HSD17B6 COX7C PARK7 SLC25A3 RPL11 UBC RPS11 TOMM7 ACADVL RPL10A APOA1 ALDH1A1 GSTA5 RPS8 PTGR1 DBI RPS27L SRP14 RPS25 PRDX6 ISCU RPL32 P4HB IER2 CD63 EEF2 RPS14 RPL35A TPT1 FGA NDUFA4 MYL12A RPL13 GSTA1 POLD4 RPL27 ANG COX5B RPL18 HINT1 UQCRH NDUFA8 NDUFS5 MANF RPS15 CHCHD2 RPL36AL COX8A NDUFB9 SDF2L1 …	2.22045e-16
drug:P843:cobamide|Congenital pure red cell aplasia-up	16984	349	261	41	APOA2 PAH C3 APOE AHCY MAT1A HRG HAMP APOC1 AHSG APOF IFITM3 RBP4 SERPINA6 SLC38A4 HP FASN F2 AGT PLG KNG1 SDS GLS2 ITIH2 GRN COL18A1 PYGL F5 FADS2 SREBF1 IGFBP1 PGK1 PROC MARC1 RGS16 BST2 APOH C1QBP SFXN1 GRINA ATAD3A	1	133	FBP1 ALDOB HPD EEF1A1 B2M APOA1 KXD1 TTR GNMT FGA OAT GOT1 FTH1 SERPINC1 APOC3 FABP1 PHYH CHCHD10 RPL10 ACSL5 CHCHD2 RPS29 TAT SLC2A2 COX6B1 CAT CLU SULT1A1 DBI SLC37A4 UBA52 INMT MARC2 LGALS9 RNASE4 QDPR RPL3 ME1 ABHD14B COX6A1 PCYT2 AKR1A1 UBC G6PC KHK RPL18A PM20D1 REEP6 SRSF5 METTL7B UQCRB OAZ1 SDHB NDUFV3 PNP RPL10A RPL13 FXYD1 NDUFV1 UGP2 BCKDHB ETFA RPLP2 MST1 HPN RPS11 DBP GSTM1 GCKR SLC2…	2.22045e-16
drug:P844:Congenital pure red cell aplasia-up	16984	315	228	29	PAH APOA2 MAT1A HAMP IGFBP1 SDS RPL22L1 NNMT GLS2 RBP4 SEC61G AHCY INO80 APOC1 IFITM3 SERPINA6 C3 KNG1 ASS1 CREG1 MARC1 FADS2 PGK1 NAA38 TUBA1B DHCR7 FASN PYGL PSMA7	1	120	APOA1 FBP1 TTR KXD1 FABP1 CHCHD2 QDPR RPS27A EEF1A1 FGA ALDOB COX6B1 RPL26 RPL3 RNASE4 GOT1 GNMT RPLP2 SDHB RPS11 ACSL5 TAT UBA52 AADAC UQCRB RPS29 RPL31 HINT1 RPL10 INMT DBI RPS5 RGN COX4I1 OAT COX5A RPL13 RPL34 RPLP1 G6PC COX7A2 RPL36 OAZ1 SAR1B HPD AKR1A1 RPS23 RPL10A RPL23A RPL27A RPS14 KHK NRN1 RPS27L P4HB RPL36AL HEBP1 RPL11 EEF1B2 NDUFB11 MFSD2A RPL4 AASS NDUFA6 ERRFI1 SLC37A4 SULT1A1 NDUF…	2.22045e-16
drug:P4421:pharmaceutical-dn	16984	326	264	44	ASS1 KNG1 APOE APOA2 APOH HP APOC1 AHCY C9 PAH IFITM3 AMACR RBP4 ASGR1 TTPA AQP9 BAAT LIPC IGFBP1 MAT1A ADK CYP1A2 SERPINA10 FABP7 GLS2 FMO1 GRINA SDS MMP14 CCT6A CRP GNE DNAJA1 GM2A PSMA4 ONECUT1 NUDT4 KMO ACSL4 SRD5A1 NPM1 PSMB2 SNRPB CTSB	1	134	FABP1 MT1A CDO1 FBP1 GSTA1 RNASE4 MT2A RPL9 CTH PCK1 SULT1A1 METTL7B TAT ACADM CRIP2 CLU G6PC GNMT ITM2B RPS3A RPL36AL SPINK1 PXMP2 HSD17B6 NDUFA4 B2M FAU ACADL SLC25A5 HADHB ALDOB OTC ABHD14B RPL4 CD81 FGA RPL15 PIGR COX7B RPL36 RPS13 TSC22D1 HPD RPL11 DECR1 RPS27L RPS9 COX4I1 RPS15A RPS23 RPS8 ALDH2 RPL26 NDUFC1 SLC37A4 GABARAP NACA ZFP36L1 PHB2 F10 EIF4A2 CD59 RPS6 DUSP1 NDUFB4 SLC25A3 BTG1 GS…	2.22045e-16
drug:P4484:biotin|cyclosporin A|phosphoprotein phosphatase inhibitor-up	16984	358	295	40	CCDC6 AMACR GGH PAH ATP6V0A4 SLC22A12 HSPD1 SYNE2 RBP4 SLC22A6 GRINA PNPO GJB2 HMGN1 DAB2 TOMM20 MTHFD1 IGF2R HNF1B SERBP1 PTGES3 ASS1 CHUK GLRX3 PARD6B SCAMP3 S100A10 NUAK2 HES6 LACTB2 TMEM185B EIF3A HSPA5 SDS RHPN1 KRAS COCH TGM2 ATP6V1C2 SFXN1	1	146	GSTA5 UGT2B15 EHHADH HPD ENTPD5 OAT TMEM59 PHYH SLC22A5 GSTA4 ACADL HGD ISCU CYB5A DBI P4HB ALDH2 RPL23A UGP2 SERPINC1 NCOA4 TPT1 SELENBP1 ALDH1A1 GRHPR ACSM2A SLC23A1 PFN1 CHPT1 ACADM CRYL1 ACO1 ECI2 DECR1 GSTO1 ANPEP CMBL ID2 GSTA1 CD59 HADHB RPL27A NDUFC1 MT1A GLYAT XDH RPS3A OXCT1 NDUFA10 NDFIP1 BNIP3 SAR1B SLC26A4 RPL13A GAMT HSDL2 RPS20 MPST MEP1A IAH1 SLC37A4 NDRG1 RPS27A CGNL1 NDUFA3 OSGI…	2.22045e-16
drug:P2060:pyrrolidine-up	16984	318	267	43	SPP1 IGFBP1 ASS1 CTSB AMACR MIOX CALB1 UBD SLC5A3 APOE HSPA9 PSMC4 CXCL1 SDS FETUB FCER1G PGK1 ADK NIT2 IGFBP3 PSPH CXCL11 VMP1 C4B CYP24A1 MIF HRG MTHFD1 KMO PAH CHDH IVNS1ABP TOMM20 TIMM17A CCL20 NCBP1 TNFRSF12A PTCD3 FCGR3A AHCY EXOSC5 LRPPRC LAD1	1	135	DNASE1 OAT SPINK1 COX6A1 B2M GPX3 MT1A RPL10 PRDX5 HPD TXNIP SGK1 CLU ATP6V0C RPL32 COX7B GPX4 SLC3A1 ACY3 GOT1 CSRP2 RPL26 NDUFS5 CYB5A GABARAP CST3 RPL35A UQCRC1 NFKBIA ECHS1 NDUFA1 CISD1 COX4I1 NDUFA5 HCFC1R1 PCK1 TPT1 NIT1 ERRFI1 OSGIN1 GHITM RPL36AL COX5B MDH1 TMEM50B NDRG1 UQCRB TSPO COQ10B CNBP TEX264 PGRMC1 DYNLRB1 OGDH CHMP5 SLC26A4 TSC22D3 FKBP5 ZFAND6 MRPL52 BNIP3 AK4 NDUFA6 PSME1 RPL2…	2.22045e-16
drug:P50:dimethyl sulfoxide|Insulin-dn	16984	381	336	50	ACLY ARL6IP1 RBP4 FAR2 ASS1 COL4A1 NAA50 IMPAD1 HK2 LACTB2 ASAH1 PDE3B HILPDA ERV3-1 PDP2 TXLNG YWHAG ACER3 SPARC LIMS1 ACSL4 UHMK1 MARC1 DHCR7 EIF5AL1 BCAP31 ZNF117 LRBA HSPA9 KIF5B SPTBN1 COL4A2 HSPD1 BZW1 ADAM12 IARS2 MPLKIP PYGL BLCAP MTHFD1 PDXK FAM199X LRPPRC PSMA4 STARD7 CYB5B MOSPD2 MZT2B ADAMTS12 OLFM2	1	161	PCK1 GPD1 FABP4 ACSL1 ACACB PLIN4 PLIN1 ACSS2 ACSF2 ACSL5 CIDEC CHP1 MEGF9 CD36 AGPAT2 ACOT2 ACADVL DECR1 PGRMC1 RETSAT HADHA EIF4EBP2 GPX4 PNPLA2 ACADM PRKAR2B AOC3 PDK4 UQCRC2 ECHS1 AQP7 HADH PGM1 HADHB ME1 INSIG1 DBI SLC16A7 MME RPL9 ETFDH LPCAT3 MVD FHL1 ITM2B MSMO1 ACO1 CAV1 NCOA4 PDE1B MDH1 RPL5 HSDL2 ANO6 MGST3 TM7SF2 ARL6IP5 SUCLA2 BHMT2 IDI1 AKR1C2 CAT EEF2 CHRDL1 ABCD2 PM20D1 ATP2B4 ACO…	2.22045e-16
drug:P4463:oxygen atom|2-butoxyethanol-dn	16984	360	259	35	HAMP PHLDA1 APOE SERPINF2 PLG ABCB11 HSD3B7 HHEX HRG GRB7 HAL SLC22A1 SERPINA6 CPN1 PROC CKS2 DIO1 MLXIPL COL18A1 C9 FETUB LIPC AMACR ITIH1 ASGR1 CYP1A2 KNG1 CRP C4B AQP9 F12 HSP90AB1 INHBE ZFC3H1 ELOVL2	1	132	OSGIN1 SEC14L2 KXD1 STARD10 KLKB1 APOC3 TTC36 REEP6 CHCHD10 PLIN2 VKORC1 HAAO FABP1 HPD PHYH GABARAPL1 C8G NDRG2 ABHD14B FXYD1 GNMT RPLP1 RPS15 NDUFV3 SERPINC1 MSRB1 METTL7B RPL26 PEBP1 COX4I1 TLCD2 RPL10 RPL18A RPLP2 UQCR11 RPL13 UBA52 P4HB PXMP2 PPM1K RPS29 TMPRSS6 OAF PPARA RPL34 ACSM1 RPS14 CISD1 RPS11 NDUFB11 APOM RPL23A SELENBP1 FAU CLU RPL36 INMT NDUFA6 ETFB MARC2 NACA HINT1 DCXR GSTZ1 ECI…	2.22045e-16
drug:P3529:ethanol|5-amino-1-(5-phospho-D-ribosyl)imidazole|dopaminium(1+)-up	16984	363	278	42	GAD1 PHACTR3 C4B SERPINE2 SPP1 HSPA5 DZANK1 PSMD12 THY1 FAM49B ANKRD34B GJB6 MOBP RPL22L1 C1QBP KRT18 SLC2A1 STEAP1 CNP PSMA7 HMGB3 PKP4 PSMA4 PSMD14 PFDN2 NPM1 SEZ6L2 PSMB2 ARGLU1 AGT TNK2 ADAM9 CPLX1 ZIC1 MOSPD1 PSAT1 PPP3CA TMPRSS11A RASGEF1A VSNL1 ECEL1 ARL6IP1	1	139	PTGDS SGK1 B2M SRSF5 PENK NAP1L5 SCG2 CKB MANF KCNJ13 GAP43 CIRBP IFI27 PLIN4 UQCRC1 RESP18 GABRA1 NDRG4 CLIC6 DNAJB9 ZCCHC12 PRNP GABARAPL1 GOT1 RPS27A RPL3 NDRG2 PVALB MAL SPARCL1 DBP CALM2 ALDOC RPS29 DNER RPS23 SULT1A1 RPLP1 ISCU SLC2A13 SERINC1 RPL10A NAP1L2 PINK1 RTN1 NEFM NEGR1 COX7A2L RHOU PFKM CDKN1A MAP7D2 RPL32 ZCCHC18 RPL18A RRAGA CTXN2 RPL11 SCG3 ELMOD1 VSTM2A NDUFA4 WFS1 RPS14 SDHB …	2.22045e-16
drug:P817:-dn	16984	430	310	53	APOA2 APOE RBP4 APOC1 PLG AHCY HP MAT1A C3 F2 APOF AHSG HAMP HSD3B7 HRG TTPA CREG1 PAH C9 SERPINF2 GJB2 PROC CYP1A2 FETUB AGT SERPINA11 SLC22A1 SCO2 LIPC C4B AQP9 INO80 HSP90AB1 SLC25A13 COX6B2 ASGR1 SERPINA10 FMO1 HSPD1 KRT18 FPGS MARC1 COL18A1 CHDH FGL1 PPA1 TCP1 INHBC KNG1 ITIH1 PLBD1 ELOVL3 APOH	1	151	FABP1 BHMT APOA1 TTR APOA4 ALDOB APOC3 RETSAT HPD GNMT FGA EEF1A1 FBP1 CHCHD10 KXD1 ACADM SERPINC1 RNASE4 ALDH1A1 B2M CYB5A EHHADH FTH1 PGRMC1 CHCHD2 CAT EPHX2 PHYH STARD10 CDO1 PEBP1 RPLP1 RPS29 PLIN2 C8G ECI1 COX4I1 ANGPTL3 HSD17B4 RPL10 COX6B1 CTSE CLU MSRB1 ALAD REEP6 GRHPR EPHX1 ACOX2 RPL26 APOB RPL34 ACAT1 ETFB UBA52 ACOT2 RPS23 SCP2 HEBP1 LGALS9 RPL18A RPS14 CD81 CMBL RPLP2 RPL3 VNN1 FAU H…	2.22045e-16
drug:P4948:donor|dimethyl sulfoxide|agonist|insulin-sensitizing drug|troglitazone-dn	16984	600	525	110	HP RBP4 APOH APOC1 AHSG APOE C3 SAA1 FGL1 AGT PKN2 SPON2 HRG LBX1 VHL ASGR1 F2 RPL7 C4BPA F12 TGFBI PRR7 CPB2 LPA NNMT TRIB3 C4B MAT1A KLC3 SERPINA6 SLC12A7 PLG TRAM1 UGT2B10 PRG4 FADS2 IER5 UGT2B4 OGFR C9 GRIN2D TMEM123 UHMK1 SULF2 EN2 CFHR1 DHCR7 BAAT AQP9 CDH24 KLK3 USP9X MRPS35 KNG1 DSP COL18A1 ATP13A3 MEX3D ZSCAN10 GGH LIPC C6ORF62 BAMBI ALPK1 UCN2 KIAA2012 F5 SQLE ILDR1 SHMT2 REPS1 ELFN1 SP…	0.999999	228	TTR DRD4 ACTB CRTC1 SERPINC1 RPS20 B2M TPT1 UBC UBB APOA1 RPS27A CDC42EP5 RPL13A UQCRQ APOC3 SLC25A3 DBI MYL6 TPSG1 SOD1 MT1M P4HB METTL7A BAALC MYL12A ANG UGT2B7 ALDH2 CYB5R3 NUPR1 COX7C HEBP1 TUBB2A LEAP2 ARL6IP4 PGRMC2 ECHS1 PPP2CB ALDOB SELENBP1 SIK1 FBXL17 UGT2B11 A1BG SEC61B PRDX6 VKORC1 BHMT NDUFV2 DSTN NFKBIA RPL6 FCGRT GLYATL1 CRYL1 ECI2 TP53INP1 RPL34 ZFP36L1 POLR2L ACAA1 OPTN CBX7 RPS1…	2.22045e-16
drug:P5637:lipid|D-glucopyranose|dihydrochalcone|phlorizin|streptozocin-up	16984	281	220	33	MAT1A SERPINA6 NNMT SDS HAMP GLS2 IGFBP1 AHCY TTPA FGL1 IFITM3 HRG PAH FMO1 CYP17A1 CREG1 SLC38A4 SLC25A22 PPA1 C3 SLC25A13 LY6E GRN FETUB KNG1 HAL KMO PDE3B ITIH2 NSUN2 RBP4 F5 OPLAH	1	117	OAT SULT1A1 GOT1 EPHX1 TAT RNASE4 CTH GSTA2 BNIP3 DBP PHYH HINT1 FMO5 TTC36 IFI27 RPS27L SLC37A4 GSTK1 DCXR SLC2A2 METTL7B ECI2 MFSD2A AASS GNMT MARC2 KLF15 REEP6 FAU UGP2 CBR1 G6PC NDRG2 HPD MAOB FBP1 ALDH3A2 GPX4 COQ10B HERPUD1 SLC25A15 ST3GAL5 ETFB CMBL ACO2 HADH SDHB GPLD1 ABCG5 APOM CCNG1 COX7A2 CHCHD10 ALAS1 CYP7A1 LHPP ACADM ANGPTL3 GDE1 NDUFA4 VDAC2 ENDOG USP2 EHHADH NDUFV1 ERRFI1 BCKDHB …	2.22045e-16
drug:P5182:toxin-up	16984	282	245	28	SH3KBP1 TUBA1A ADD3 PABPC3 YWHAZ DSP RLIM PPA1 BIK SOX9 MARCKSL1 YWHAB SLC12A2 IFI30 ITGA6 SERINC5 GRN DSG2 TNNT1 S100A11 C4ORF46 PLA2G2A TMEM123 ZNRF3 HSP90AB1 TOMM20 NAA20 KTN1	1	127	RPS11 AKR1B10 S100P TFF1 AKR1C3 ID1 DCAF6 RPS8 ID3 TUBA1A AGR2 OAT FTH1 CD63 PRR15 TXNIP ALDH1A1 RPL23A GABARAP RPL36 LGALS4 ALDH3A1 MKNK2 ARL6IP5 RPL36AL IFI27 TSPAN1 CCNG1 PFDN5 RPL34 DYNLT1 SRP14 PEBP1 RPL27 RPS5 EEF2 CTSE CAP1 CAPNS1 NQO1 TPT1 RPS13 RPL32 HADHB TUBB2A SCP2 NCOA4 EEF1A2 TMEM14A OST4 TBCA CD81 SSR4 RNASEK UBA52 CHMP2A RPL26 COX5B VAMP8 RPL6 MVP TSPO IFT20 NOP10 RPS29 GABARAPL2 …	2.22045e-16
drug:P166:cholesterol-up	16984	408	335	61	SLC38A4 BAAT SDS HRG CPB2 GJB2 CRP RARRES1 TTPA GLS2 AHCY FAM111A ADK CREG1 C3 C4BPA HSPD1 RBP4 CTSC F5 RPL22L1 CFHR1 AMACR NIT2 HSP90AA1 MAFB ONECUT1 HSPA1B LRRC58 HHEX ASS1 VMP1 SLCO1A2 FAM120A STAC3 LYPLA1 INHBE ABCB11 HNRNPK BBOX1 GNPNAT1 SLC25A13 LIPC C4B VAMP7 HSD3B7 SERPINA6 HSP90AB1 CCT2 HAL IGFBP3 M6PR MCCC2 BST2 NPM1 ACSL4 CACYBP IREB2 HSP90B1 LACTB2 IGF1	1	161	HSD17B2 ERRFI1 HBB EIF4EBP3 EHHADH CYB5A RARRES2 BHMT OTC RNASE4 ANGPTL3 ALAS1 MFSD2A FBP1 SULT1A1 HADHB HACL1 SULT1B1 RPS13 INSIG1 GOT1 SUCLG2 TMEM59 ITM2B SLC25A5 RPL15 ALDH6A1 EPHX1 ANG ECHS1 MGST3 ENPP2 GSTK1 SMPDL3A MT2A CD81 P4HB ALDH3A2 ETFDH AGMO TSC22D3 AGXT2 CHCHD2 COX6A1 SKP1 SLC2A2 CREB3L3 CHPT1 GPT TMEM14C HSD17B4 RPL10A HBA2 AASS HERPUD1 VKORC1 MAOB B2M RPL6 TTR GAMT SLC25A3 SLC37A4…	2.22045e-16
drug:P4810:ochratoxin A-dn	16984	378	307	46	KNG1 FASN DHCR7 RBP4 POMP C4B HSD3B7 GRN CTSB KRT18 AQP9 C4BPA MIF ASGR1 PSMB2 GNS GM2A PSMD2 PSMD11 DHFR CALU CMTM6 PAICS ACLY TAP1 PEX5 DAO TRAP1 FMO1 SLCO1A2 PDIA4 G6PD ENO1 IFITM3 IGF1 FKBP1A TP53 TUBA1B MORF4L2 CTSC ABCB11 GJB2 EFNA1 PGK1 SLC12A7 KCTD13	1	150	HBA2 HBB BHMT EPHX1 PLIN2 DBI CTH G6PC ALDH1L1 GSTM1 FAU GSTA5 COX8A SLC25A1 NDUFA3 UBC NDUFB4 RPL31 RPLP2 ALDH2 GSTA1 TPT1 APOA1 F10 COX5B RPS27L FABP1 P4HB MDH1 NDUFB9 UBA52 CD81 PCK1 SULT1A1 B2M NDUFC1 GCKR PIGR PFN1 KHK SEC61B LGALS9 AKR7A3 FBP1 RPL11 PEBP1 RPS9 COX7A2 RPS11 CRIP2 FGA DYNLRB1 TXN2 METTL7B MGST3 APOM PKLR TSC22D1 ITM2B NDUFA4 TMBIM6 SLC28A2 RPS25 GSTK1 SOD1 RPL10 RPL9 UGT2B17 …	2.22045e-16
drug:P1782:-up	16984	300	215	28	HAMP MIF PAH APOA2 AQP9 SERPINA6 CYP1A2 CYP7B1 SLC38A4 RBP4 SLC22A1 SRD5A1 IGFBP7 APOC1 DIO1 CREG1 LRRC61 RGS16 SLC25A30 ERBB3 GNE SLC25A13 INO80 AHCY ELOVL3 CDK2AP1 SUDS3 CYP26A1	1	115	PCK1 RNASE4 GABARAPL1 FABP1 EEF1A1 HPD HSD17B6 LHPP PHYH CHCHD10 TPT1 GSTK1 PLIN2 ALDH3A2 B2M HGD RPS15 RPL18A CMBL NDUFB9 ID2 DAD1 OST4 NDRG2 CROT ABCC2 TTR AKR1A1 TOMM40L CYB5A METTL7B GSTA3 NDUFB11 UBA52 CHP1 ECI2 RPS5 SOD1 MSRB1 CDO1 CISD1 C8G RPL18 TSPAN31 HIGD2A ABCG5 RPS6 GABARAPL2 OAF GOT1 COX5B FABP2 RPL36 NRN1 DYNLRB1 RGN TXNDC17 DHRS1 CST3 RPL29 NDUFB4 RABAC1 IMP3 UQCRQ RPL31 UBL5 ACOT…	2.22045e-16
drug:P2352:ethanol-up	16984	274	240	36	CP GJB2 PPA1 SFXN1 IGFBP7 HSPD1 PDIA3 GSPT1 GLS2 RCL1 GLDC EBPL PSME4 PTPRE TRAM1 COPB2 GM2A DPAGT1 SQLE PDP2 TMEM38B GNS PSMB2 PTBP1 MTDH NOP58 ELAVL1 ITGB5 CHUK GTF2F2 TBRG4 FPGS TTC39C CCT8 FAS ZDHHC9	1	125	GSTM1 CHCHD10 ERRFI1 ALDH2 TMBIM6 GSTZ1 RNASE4 EPHX1 STARD10 SCP2 ETFB RPS27L BLVRB C8G RPL36AL DBI ABHD14B ETFA SLC25A5 VKORC1 GPT NDUFA4 RETSAT CCS CHP1 PTTG1IP STBD1 HINT1 SLC6A13 GRHPR SLC25A15 UQCR10 EPHX2 TMEM14C XBP1 GSTK1 GSTO1 ECHS1 ACADVL RPL37A ALDH1L1 ENTPD5 HADHB ALAD IQGAP2 SUCLG2 CSRP2 CCDC107 ACSS2 PSME1 EDF1 ADH5 HBP1 ALDH6A1 HSPB8 HMGCL EEF1D EEF1B2 ACTB TMEM120A SURF4 BTF3 GPX4…	2.22045e-16
drug:P5746:dimethyl sulfoxide|paracetamol-dn	16984	416	347	48	S100A11 S100A10 FKBP1A HPRT1 SEC61G KRT18 ADK AHSG PSMB2 BST2 PSMA1 GNAI3 IFI30 NPM1 POMP NIT2 FETUB ZWINT TOMM20 CACYBP GPNMB UBD UGGT1 SRP9 PPA1 RPL22L1 MORF4L2 IPO7 FCF1 PTGES3 EIF4EBP1 TIMM17A GLRX3 NDUFA4L2 PFDN6 BBOX1 CPB2 EIF2S2 POLR2D RAN MRPS17 C1QBP CREG1 PDCD5 MTPN EEF1E1 PERP MAL2	1	165	GSTM3 RCAN1 UGP2 MT2A RPS25 CDK2AP2 SEC61B RPS13 BNIP3 DSTN RPS27A MSMO1 MYL12A ARL6IP5 RPL10A RPL18 RPL13A CALM2 ARPC2 ATP6V0E1 GSTA5 MOCS2 SULT1B1 HSPB8 SERINC1 RPS3A CST3 PTGR1 LGALS3 COX7A2 BHMT IDI1 UQCR10 PFN1 RARRES2 RPL15 SKP1 NDUFS5 TBCA SERP1 EPHX1 PRDX6 RPS20 OAZ1 UBL3 DPT VAMP8 PECR NDUFB1 C8G SPCS1 RHOA COX4I1 RPL27 SDHD SNX3 TMEM59 PRDX2 RPS14 ATP6V1D PRDX5 SELENBP1 PFDN5 RPS6 AKR1A…	2.22045e-16
drug:P3575:-dn	16984	544	441	77	DDN PPP3CA TUBA1A FAM81A LAMP5 SYNPR PGM2L1 TUBA1B SLC39A10 MORF4L2 ATP6AP2 MAP2K1 CHST1 STMN1 FOXG1 NLK ENC1 SPTAN1 ATP6V1A PGBD5 CRYM ATP6V1C1 PSMD14 NTM DNAJA1 DUSP14 LRP11 PGK1 YWHAZ PLS3 CCT6A BHLHE40 DEK GAD1 MAL2 TCP1 ATP6AP1 PHACTR3 HNRNPA3 EPHX4 CDH11 HSP90AB1 DHX15 PPME1 OSBPL8 RAB15 RASGEF1A MCF2L RNF44 HEXB TOMM20 FAM49B BCL11B ATXN7L3 HNRNPK RTN4RL2 PCNA UBA2 POMP KCNV1 LUC7L3 ARL6IP…	1	199	EGR1 GPM6A HPCAL4 CALM2 CCK TUBA1A CALM1 OLFM1 KXD1 SLC4A10 WASF1 RTN1 ITPR1 NDRG4 OSBPL1A GRIA3 CKB FBXW7 NRSN1 GRIA2 PEBP1 OAZ1 NRN1 ATP6V1D NDFIP1 EEF1A1 RAPGEF2 GDA COX4I1 NPTN SCG3 FOS COX6A1 CELF4 ITM2C FRRS1L NBEA CHCHD2 MAT2B PRICKLE2 NR4A1 RPL31 RPS14 ATP6V0C RPLP1 NGEF VIP COX7A2 ATP6V0D1 DUSP1 SRSF5 SERINC1 NEGR1 ITPKA NDUFA4 RASL11B PGRMC1 RGS4 SNX3 UNC80 DSTN ELMOD1 SYT16 BNIP3 PPP2R…	2.22045e-16
drug:P2051:fingolimod hydrochloride|sphingosine|sphingosine 1-phosphate|adjuvant|fingolimod|Neuraxis-dn	16984	297	238	33	ZIC1 LAMP5 STMN1 RPL22L1 INO80 MOBP HEXB CNP KCNJ10 HNRNPA2B1 R3HDM1 KCND2 RPL7 NLK GRB14 PSAT1 SYNPR PPP3CA LRRC58 LUC7L3 PHLDA1 CDK2AP1 ARAP2 HNRNPH1 PSMC4 DEK SLC12A2 HNRNPD PAICS VSNL1 NREP HMGB3 GABRD	1	124	EGR1 PLP1 TAC1 TTR QDPR CKB SNAP25 PENK CST3 SPARCL1 FTH1 RPL4 RPS29 FAU DENND5A MAL RPL26 RPLP2 RPLP1 RPS15 PTN CALM1 RPS27A RPS14 NGEF ARPP21 EEF2 FOS RPS15A RPL34 OLFM1 RPL36 RPL31 UBA52 RPL23A CNBP DBI ACSL6 SEC11C RPS23 CAMK2B PDE1B ACO2 SCG2 RPS8 DBNDD2 EVI2A RPL27 SYTL2 RTN4 CCNI FEZ1 UQCRB EPHA7 CHCHD10 NPY CHCHD2 PKIG ASPA RPL36AL OSBPL1A COX7A2L RPS5 GLRB CYFIP2 NPTN RGS10 GDE1 FA2H RPS…	2.22045e-16
drug:P5726:bleomycin A2-dn	16984	289	233	44	HSPA1B BPIFA1 FMO1 TNNC1 TNNI3 CSRP3 TCAP BCL6B HSPH1 SLC43A3 IGFBP3 MCF2L NPPA NT5DC2 ATP6V1C2 TIE1 PTTG1 MXRA8 MAPK12 SLC36A2 C3 ENG KDR AMOTL2 IVNS1ABP RAPGEF5 USPL1 TINAGL1 BAMBI HOPX RAPH1 PLXDC2 AFAP1L1 MYH6 GBP7 CHST1 NRARP TM4SF1 EXPH5 SCEL PRRC2B UPK3B PPP4R2 SSH2	0.999952	122	NR4A1 INMT KLF2 DUSP1 CYP4B1 IGFBP6 CFD SELENBP1 PCOLCE2 PER1 DBP GPR155 PXDC1 ERRFI1 CDO1 MYL6 NRN1 SEMA3G CLDN5 BMP6 EGR1 CSRNP1 LYVE1 GPX3 TSPAN7 JUN USP2 HERPUD1 ACTC1 XDH GSTA4 ITPKB CRY2 KLF15 PINK1 FXYD1 GPIHBP1 NDRG2 PDK4 BTG2 GABARAPL1 ATF4 TNS1 KLF6 PRDX6 NFKBIA DPEP1 ICAM2 SULT1A1 MYL9 TMTC1 PRICKLE2 SERTAD1 ACER2 RABAC1 RASGEF1B GSTA3 PGM5 UNC45B TMCC2 ATF3 GSN ADAMTS1 MAMDC2 PAF1 CNS…	2.22045e-16
drug:P4956:donor|dimethyl sulfoxide|agonist|insulin-sensitizing drug-dn	16984	600	525	100	HP RBP4 APOH APOC1 AHSG C3 APOE SAA1 FGL1 AGT SPON2 HRG MIF VHL ASGR1 F2 UBD TUBA1B RPL7 C4BPA F12 ITIH1 CPB2 LPA NNMT TMEM123 C4B MAT1A GRN KLC3 SERPINA6 IFITM3 IFI30 SLC35E4 CP PLG TRAM1 UGT2B10 GPI PRG4 FADS2 UGT2B4 C9 SULF2 NAA38 RAX2 CFHR1 DHCR7 BAAT AQP9 CLTC HNRNPM USP9X MRPS35 KNG1 KRT18 COL18A1 CLDN1 FN1 GTF3A MRPL19 MZT2B GGH LIPC C6ORF62 CRYM PGK1 CXCL1 EBPL MYO1B FDXR SCD F5 SQLE ILDR…	1	228	TTR ACTB TM4SF4 SERPINC1 RPS14 CD63 RPS20 B2M TMBIM6 APOA1 TPT1 TUBB2A AKR1C3 APOC3 SLC25A3 DBI CYB5A SOD1 CHP1 FAU MYL6 P4HB MVD METTL7A SRP14 CYP2C9 COX6A1 ANG UGT2B7 ETFB MDH1 ALDH2 SDF2L1 HINT1 ALDH1A1 NDUFS5 NDUFB2 PARK7 COX7C GSN PGRMC2 ECHS1 NDUFB9 OAZ1 MANF ECI1 ALDOB SELENBP1 PTGR1 RPS27L FABP1 UGT2B11 A1BG SEC61B CALD1 PRDX6 VAMP8 VKORC1 BHMT NDUFV2 DSTN NDUFA4 RPL6 FCGRT GLYATL1 MORF4L…	2.22045e-16
drug:P2036:imipramine|sucrose|antidepressant|L-proline residue|fluoxetine-dn	16984	269	231	30	RSL1D1 APOE ADCY1 DDN DPYSL2 SLC30A3 BCAT1 KCNG1 RPL7 LAPTM4B KLF16 KCTD13 ATP6AP1 CTSB LIN7C MIF HSP90AB1 CACNB3 SLC6A11 SLC6A1 CACNG8 AGAP2 PSME4 R3HDM4 PSAT1 DNM1 NUAK1 UNC13A FCER1G BCAP31	1	121	RABAC1 COX7C SLC8A2 DYNLL1 SHISA4 MTCH1 NAPA CDS2 RETSAT DAD1 PTGDS FIS1 RPS20 COX4I1 NPY SLC22A17 PLP1 EEF1A2 FTH1 USE1 UCHL1 FAIM2 CD81 SLC25A11 EEF2 CXCL12 NOP10 PARK7 RPL13A NIT1 GSTM5 FRZB RPL11 DLG4 AP2M1 RTN1 TPPP HIGD2A RPS6 CKB TSPAN7 RPL35A CD48 MPPED2 SLC25A3 ITPR1 RPS23 GABARAP JAGN1 NDUFA4 SCG5 SYP HINT1 TAGLN3 CST3 DEXI DYNLRB1 MT3 VKORC1 SNCB S100B NDUFV1 UROD CLPP ACTL6B SST CKMT1…	2.22045e-16
drug:P5346:organophosphorus compound|ethyl-dn	16984	346	282	37	MYH6 NPPA CSRP3 FASTKD1 IMPA1 TNNC1 MRPL15 ANKRD1 SH3KBP1 STARD7 CTR9 SMNDC1 LBH TNNI3 INTS8 RABGGTB C4ORF46 MIF DROSHA DNAJA1 HSPA1B RPL7L1 MTIF2 DNAJB6 HEXB CPVL NEBL POLB HOMER1 SUGT1 HSP90AA1 RANBP6 MRPL13 BIRC6 ADD3 NUP37 MAP2K1	1	141	MYH7 ID1 NDUFA12 GOT1 DYNLT1 DYNLL1 NDUFA4 SLC25A5 COX6B1 SMPX CISD1 COX8A UNC45B NDUFA1 NDUFAB1 ISCU UQCRH NDUFB9 NDUFA8 UQCRQ NDUFB5 SLC25A3 ID2 RPS29 ACTR10 GABARAPL2 NDUFA6 NEXN RPS20 MRFAP1 COX7C ID3 MRPS36 APOBEC2 POPDC2 ACTN2 COX7A2 RPL10 ITGB1BP2 TDP2 VDAC2 IRF2BPL NDUFA3 GYG1 FABP3 ARMCX1 TP53INP2 MYL2 PFKM TERF2IP UBA52 NCOA4 NDUFS2 RPS13 MRPS6 NDUFS3 PPP1CC HADHB FTH1 TBCA NOP10 RPL32 …	2.22045e-16
drug:P280:genistein|daidzein|dimethyl sulfoxide-up	16984	283	245	29	LAIR1 SCD COL1A1 MSX1 GREM1 SNAI2 NNMT SEC61G HOXC8 PSAT1 COL3A1 HMGN1 TNS3 RFTN1 TRMT5 PDGFRB PIK3R2 POMP XPNPEP3 MAFB GTF3A GNPDA1 DRAM1 SFRP2 THY1 PSMA4 CYB5B LMCD1 NREP	1	127	ID3 RPS8 RPS27L HMOX1 TOMM7 TXNIP OST4 ID2 RPS11 RPS29 AKR1C2 STMN2 GPX4 RPL15 RPS13 RPL11 RPS9 BTG1 TPT1 UQCRQ FTH1 AKR1C3 RPL31 RPS5 COMMD6 RPL18A JUND OAZ1 ACTA2 RPS25 MTCH1 RPL13A RPS3A RHOQ RPL3 CRYAB RPS6 COX7C CCNG1 RSL24D1 GLRX WBP2 NDUFB5 RGCC PSMB6 CCNI COX5B CHCHD2 CIRBP RPS27A PPP1R3C NDUFB2 EEF1A1 RPL26 PMP22 ATP6V1G1 NDUFS4 PCBP1 FOS CRISPLD2 EEF2 COX6B1 GTF2H5 DAZAP2 NOP10 RPLP1 RI…	2.22045e-16
drug:P756:psychotropic drug-dn	16984	342	281	43	GJB6 SFXN1 EGR4 FKBP1A CAMK2N2 APOE FKBP4 STK32C SLC2A1 MIF HSP90AB1 FARSB HNRNPM PRR7 ACLY SPRED1 MOBP SOD2 SNRPD1 ENO1 MORF4L2 BTAF1 CHORDC1 PPP1R9B ENC1 ILDR2 HSPH1 BHLHE40 PFDN2 AHSA1 MAPRE1 PSMC1 YWHAB AKAP5 CCDC6 SLC24A3 NIPA1 S100A5 ZIC1 CCT6A CRYM PPP1R1B AGRN	1	140	TTR EGR1 UBB COX4I1 SGK1 PTGDS RPL9 UQCRH CALM3 NDUFA4 EIF4H MT3 KLF9 MFN2 UQCR10 RPS11 WASF1 NDN UQCR11 RASD2 RPL36AL MYL6 RPS9 COX5A COX6B1 SST RPS25 SLC25A5 CST3 NDUFA11 FTH1 NDUFA7 XBP1 KRTCAP2 UBL5 NDUFB3 RESP18 FAM107A NDUFS8 ISCU RPL18A AP2M1 NDUFA2 NDUFS3 RPL34 EIF1B HINT1 WIPF3 EIF3F AKR1A1 RPL3 NDUFA1 TCEAL5 CD81 RPS15 PVALB CLIC6 RPS8 NDRG2 EDF1 DYNLL1 POLR2L WFS1 AP4S1 ALDH2 RPL26 RAB…	3.33067e-16
drug:P3974:-dn	16984	295	247	26	APOE SPARC COL4A2 COL1A1 RBP4 HILPDA APOC1 SREBF1 S100A10 THY1 GPC1 SCD LOXL1 MEST DHCR7 ACLY PSAT1 FDXR EFNB1 NOP16 MTHFD1 IFITM5 PYGL PABPC1 GABRE FBN1	1	127	NR1H3 DBI PTX3 NUPR1 CFD PLIN4 AOC3 MGST3 CIDEC CYB5A RPS20 TUBB2A ETFB RPLP2 RPS6 MVD ACSS2 CAV1 RPL11 PRDX6 GPD1 ACSL1 CLEC3B PGM1 ECHS1 RPL3 AKR1C3 NDUFS5 RPL32 COX7C UQCRH RPL13 BLVRA RPS8 PTGDS COX14 MPST GPX4 ADH1C SOD3 UBC CKB RPS14 PPP1R1A RPS11 ACADVL EEF2 IDI1 ECI1 ZNHIT1 HADH TIMM8B PC RPS25 SOD1 ETFDH HADHB RPL37A COX7A2 DECR1 SLC25A1 RPS13 ACO2 TOMM7 MRPL41 ACOT2 COX8A PIR RPL27 LGAL…	3.33067e-16
drug:P4820:ochratoxin A-up	16984	548	466	81	APOE CTSB ASS1 GNS HSP90AB1 GRINA FMO1 TUBA1C DAB2 PAICS LRP2 DAO PAH SPP1 PMEPA1 IFITM3 TUBA1B ACP5 DDAH1 HNRNPK EIF3B SERPINH1 GRN PSMD2 TOMM20 ARPC1B YWHAZ AQP2 RPN2 HNRNPF OPLAH ADK CD24 YWHAB PLAU IGF2R SPARC SNRPB PSMD11 C1QBP IGFBP3 ATP6AP1 NUDT4 BGN YWHAG MMP14 ENO1 UBQLN1 AIMP2 LEMD2 PSMC4 HSPD1 SLC12A7 PIGL SLC22A1 ZC3H4 MORF4L2 ANXA2 VHL CPSF4 PAX8 PREP CHDH PSMB2 RABGGTB CELSR2 TIMM17…	1	207	MT2A ITM2B TPT1 ALDOB SLC25A3 RPS9 TMBIM6 RPL18 FBP1 SLC37A4 AKR1A1 SLC6A8 RPS8 RPS13 RPS15A GABARAP GSTA1 MDH1 COX7A2 GLUL NDUFA4 CD63 NDUFB9 TCN2 RPL13A RPS29 RPL9 SPINK1 AK4 RPL11 ATP6V0C TSC22D1 SLC25A5 UBC RPS27A ALDH1A1 RPS23 RPS11 RPL6 CRTAP B2M RPL26 SOD1 NDUFV2 AMN SLC25A4 OAZ1 NDUFB4 EEF2 G6PC NACA CAPNS1 NDUFB3 HBB PDZK1 SLC26A1 AP2M1 GALM TXN2 RPS14 PHB2 DBI PPP1CC RPS3A SLC25A1 AGXT2…	4.44089e-16
drug:P2059:pyrrolidine-dn	16984	333	282	40	CALB1 DAO IGFBP7 DIO1 HSPA5 CDH16 ATP6AP2 OPLAH CCND1 ASS1 ALOX15 APOE PMEPA1 TUBA1A SPP1 MIF CCT4 HSPA9 IRF3 HNRNPA2B1 SFRP2 AMACR PSPH MRPL13 SERBP1 EIF2S2 ANXA1 KRT7 DAB2 BLOC1S2 DAPL1 TCP1 SLC22A6 LYPLA1 NCBP1 RPL7L1 USP14 CCT3 FMO1 OLFML2B	1	140	UBB TPT1 PEBP1 RPL3 RPL32 SGK1 ACY3 MDH1 RPS27A RPS14 COX4I1 DCN HBA1 SULT1C2 RPL9 CCNI SMOC2 SLC25A4 ALDH1A1 DNASE1 PRDX5 TXNIP COX6A1 COX7B B2M RHOA HBB UQCRB MAP2K2 SLC22A5 BTF3 SKP1 ABCD3 ACADM RPLP1 ECHS1 OAZ1 DBI SUCLG1 IAH1 GRHPR MEP1A TMBIM4 BPHL HGD NDUFB5 TUBA1A NDUFB2 SLC25A25 NDUFS3 HPGD KHK CRYAB ERRFI1 ECI1 PRDX2 ATP6V0E1 FABP3 CDIPT SLC26A4 AGXT2 BLOC1S1 NDUFAB1 ABHD14B SOD3 PYROXD…	4.44089e-16
drug:P2571:4,4'-diaminodiphenylmethane|inhibitor|(2Z,3Z)-bis\{amino[(2-aminophenyl)sulfanyl]methylidene\}butanedinitrile-up	16984	291	268	41	ALPP OPN3 NKX2-1 FBN1 SLC38A4 PNMA2 SCD LMCD1 FADS2 SLC5A3 DAB2 TNFSF9 ARL4C POLM GPNMB DHCR7 CFHR1 GNE MEGF6 SOX12 GABRE PHTF1 RGS20 G6PD FSCN1 LPCAT1 DPYSL2 NTM NREP GABBR1 FZD2 TNS3 KIAA0930 CUL4B FCHO1 AGTPBP1 RABL2B MID1 TUBA1A ARID5B FASN	1	135	CYP1A1 AKR1C3 ID4 GNAI1 SECTM1 SYNC NR3C1 AKR1C2 ARMCX1 SOCS2 RNASE4 LSS ABCG2 RGL1 ID3 GSTA4 SMARCD3 NDRG4 LMO3 PMP22 PDGFD AHNAK2 EDIL3 PDE9A GLYR1 TGFB1I1 INSIG1 ME1 ID1 SELENBP1 GSTM4 PPP1R3C ACSL1 SLC25A1 ACYP2 MRPS6 PINK1 OLFML2A LIMCH1 TLN1 HCFC1R1 RCBTB2 NBEA ELOVL6 GPM6A VIPR1 PIR DDX60 EPHX1 HMOX1 RAB4B JUND CTSO RABAC1 MVP HPGD DENND3 CSRP2 PCYT2 SULT1C2 TIPARP SLC25A23 FUCA1 RCAN2 WDR…	4.44089e-16
drug:P5535:inhibitor|protein polypeptide chain-up	16984	426	338	54	CAMK2N2 DDN HOPX SYNPR RPL22L1 SLC39A10 KIFC2 RPL7 GRM5 PRKCG PLA2G7 STMN1 SHANK3 TRIM32 RASGEF1A KCTD13 PGK1 PPP3CA INO80 PLS3 GPC1 PRPS1 LINGO1 PDP1 PGBD5 TOMM20 CACYBP HNRNPA3 PSMA7 CCT2 HNRNPU YWHAB LRRC58 YWHAZ PMEPA1 HSP90AB1 PPP1R1B UBA2 ATP6V1A FAM49B RNF149 DAGLA NTM ATXN7L3 SNRPE HSP90B1 PSMC4 ZBTB11 SPTAN1 KCNJ10 SRP9 LAPTM4B SLC12A2 LAMP5	1	161	SCG5 ITM2C GPM6A RPL31 NPTN WFS1 PTGDS CALM1 CHCHD2 CCK RPL23A RHOB OLFM1 RPL4 NPTX1 DENND5A APLP1 UBC TUBB4A HPCAL4 NRSN1 QDPR RPLP2 ATP6V1D GDE1 RAPGEF2 FTH1 DNER AMPH RPS5 NBEA RPS14 TPPP NDFIP1 CELF4 COX6A1 PSD NNAT MAP1LC3A EID1 UCHL1 CSDE1 VAMP2 TMEM59L EIF1B SPARCL1 WBP2 RPL13 NEFL RPS29 SGK1 HIGD2A PRDX2 COX5A HPCAL1 SEC23A OAZ1 CALM2 UBE2E1 ATP6V0E2 RASL11B PRKACA NELL2 PJA2 TRAPPC2L CPN…	4.44089e-16
drug:P2860:hormone-up	16984	319	255	49	APOA2 ASS1 CYP7B1 HSD3B7 AHSG APOC1 ACLY MAT1A HAMP APOF HSD17B7 GDF15 IFITM3 TUBA1B ADK TTC39C HAL ENO1 NNMT PFDN2 BGN EFNA1 CYB5B HMGN1 HSPD1 F2 ELOVL3 SQLE PCSK9 PYGL MRAP RBP4 SOD2 SDS LRRC8D NREP GLS2 FPGS TGM2 MCM10 RANGAP1 GRN CLDN2 GTPBP4 NRP1 MRPL42 HNRNPM DHCR7 EBPL	0.999961	130	ZFP36 G6PC EGR1 RPLP1 UBC GNMT ALDH2 NFIL3 OAT SOD1 JUNB APOC3 ACSL5 TST RPL3 DUSP1 MSMO1 SLC25A25 TMBIM6 SLC25A5 FBP1 KHK GPT BHMT2 DDC CD81 NUDT7 FGA ALAD WBP2 NDUFA6 AGPAT2 XBP1 VPS28 GLYAT RPS20 BAG3 CSRNP1 ST5 ALDH1A1 ETFA FOS CDO1 UBXN1 COX4I1 TTR SLC25A15 GLRX5 GADD45G PPP1CA PARK7 TMEM14C NAT8 UQCR11 HEBP1 ISCU ALDH1L1 LGALS9 GAMT ADIPOR2 RPL23A RAB11B NDUFA10 SCP2 NDUFV1 TXNIP CCS SYVN1 …	4.44089e-16
drug:P4916:-dn	16984	375	232	35	POU2F3 INO80 SEC61G PUS1 NAA38 HCN3 PDPN PFDN6 FMO1 PDCD5 LRRC15 OSBPL8 SPEM1 NDUFA4L2 FOXP3 RPL22L1 ARRDC1 TCF23 ALG8 PYCR2 PFDN4 HESX1 COX6B2 ITGBL1 MAGOH DAG1 KBTBD2 SNRPG RALBP1 ZC3HAV1L SF3B4 NOB1 PWP2 MYSM1 NXT1	1	121	TIMM8B NDUFC1 NDUFA6 NOP10 NDUFS5 AURKAIP1 NDUFB3 TRIOBP CDKN2B OXT RPS14 NDUFA7 TMPRSS6 RPL37A COX7A2 CBR1 PLA2G10 UQCR11 RPL27 LMOD1 NPY HIGD2A TRAPPC2L RPL36AL NDUFB11 SLIRP SST CHCHD10 NDUFA4 RPL36 GLTP NDUFA5 RPL23A EPN3 UQCR10 COX6B1 CCDC142 TUBB2A RGS10 LSM10 COX6A1 MT3 NDUFV3 CYB5A VPS28 UQCRH MRPL43 NME3 RPS27L ALKBH7 PIM2 KCNH1 CMYA5 SDHB INO80B PTRHD1 FAU TMEM14C MRPL23 ME3 SERF2 GKN2 …	4.44089e-16
drug:P4416:pharmaceutical-dn	16984	382	303	40	ASS1 APOC1 KNG1 F2 APOH AHCY RBP4 LIPC C9 C4BPA PAH AQP9 BAAT DPYS CTSC GLS2 IFITM3 CYP1A2 AHSG FMO1 ASGR1 MAT1A KMO ENO1 ADK IGF1 AMACR RRBP1 DIO1 SRD5A1 PROC CTSB INHBE APOE ONECUT1 CMTM6 PYGL GM2A POMP SREBF1	1	148	BHMT ALDOB CDO1 RPS29 SULT1A1 RNASE4 FGA FBP1 RPL31 PIGR HSD17B6 PCK1 NDRG2 CTH CD81 APOC3 GNMT TSC22D1 RPL29 G6PC SLC25A5 CLU TTR COX4I1 TPT1 MGST3 RPS23 RPS3A COX7B TST B2M ACADM GSTA1 METTL7B FABP1 PAPSS2 RPL26 TAT NDUFA4 SLC37A4 SOD1 SEC61B OTC FTH1 RPS27A ITM2B KHK GAMT APOM PTTG1IP ALDH2 RPS27L HAGH KLKB1 NDUFA8 RPL15 RPL36 SULT1C3 ECHS1 HAAO LGALS9 RPS13 ACOX2 GABARAP CRIP2 RPL9 MDH1 RPL10…	4.44089e-16
drug:P4954:donor|dimethyl sulfoxide|agonist|insulin-sensitizing drug-dn	16984	600	536	112	HP RBP4 APOH APOC1 AHSG C3 FGL1 AGT HRG F2 ASGR1 COL18A1 UBD C4BPA F12 ITIH1 CPB2 LPA NNMT C4B MAT1A IFITM3 SLC12A7 SREBF1 CP PLG TRAM1 UGT2B10 PRG4 HSP90AA1 UGT2B4 C9 TMEM123 NBPF15 PTPN11 KPNB1 SULF2 CFHR1 DHCR7 AQP9 USP9X KNG1 DSP CLDN1 ATP13A3 FN1 GTF3A F5 GGH CXCL1 DPM1 EBPL MYO1B TAPBP SQLE PTDSS1 SHMT2 ANXA2 RELB MYH9 POTEE SMYD2 AMOTL2 HNRNPA3 NCOR2 PPP1R14B DAO SLC22A1 TTPAL PLK2 TNFAIP2…	0.999999	231	TTR UBC MT2A SERPINC1 UBB CD63 B2M TPT1 APOA1 RPS14 CHCHD2 MT1B RPL13A MT1A UQCRQ P4HB MT1H SOD1 SLC25A3 MT1X MYL6 RPS11 HINT1 MT1M MT1G MYL12A UGT2B7 RPL10 PCK2 ALDH2 SDF2L1 ALDH1A1 NDUFB2 COX7C TUBB2A POLR2L ARL6IP4 PSME1 ECHS1 MANF ALDOB SELENBP1 UGT2B11 A1BG SEC61B EEF1A1 VKORC1 BHMT NDUFV2 DSTN NFKBIA RPL6 GSTO1 GLYATL1 ECI2 TP53INP1 ZFP36L1 TUBB6 ACSM2A RPS13 CD99 BNIP3 PEPD DAZAP2 TMEM59 F…	4.44089e-16
drug:P5340:estrogen-up	16984	364	327	62	LY6E TACSTD2 TIMP1 ENO1 TNFRSF11B KRT80 TUBB3 SLC5A6 CD24 SRSF9 MYH9 TEX19 TFRC CYP26B1 GNS SHISA2 CDK2AP1 MAL2 ATP6AP1 HENMT1 MUCL1 THEM6 PIEZO1 ATIC IFI6 ISG15 SLC39A1 ANXA2 ANXA1 TGFB3 TMEM132A PAWR ELF1 BST2 SH3BP4 KIFC2 TUBA1A TFAP2C UPK2 HSPH1 DBNDD1 SRRT INHBB TUBA1C S100A10 CLDN7 ARID5B TMEM79 CDK7 NRCAM TUFT1 LAGE3 CELSR2 RANGAP1 DHCR7 PERP CLDN1 ERMP1 PPA1 KTN1 LYPD3 MYO1B	0.999998	157	MYL12A NUCB2 COX4I1 TMBIM6 COX7C OST4 TPT1 RHOB NDUFB2 CSRP1 SSR4 COX6B1 OAZ1 MYL6 UQCRQ IFI27 S1PR3 EEF1A2 FBP1 PEBP1 SOD1 GSTK1 TMBIM4 ADIPOR2 TST CD81 ISOC1 RHOC RPS11 SLC44A2 ATP6V0E2 COX6A1 CALM2 GYG1 ECHS1 GUK1 COX7A2 CKMT1A STARD10 CYB5R1 MGST3 PPP1R3C DAZAP2 PALLD GHITM P4HB AVPI1 ACTB ZNHIT1 COX5B REEP5 ATOX1 BAG3 ETFA BCAS1 MRFAP1 SUSD2 CPE KLF6 ATP6V1G1 CAB39 RPL36AL TM7SF2 RAB5B NDUFA…	4.44089e-16
drug:P3540:ethanol|5-amino-1-(5-phospho-D-ribosyl)imidazole|dopaminium(1+)-dn	16984	363	285	45	DDN CNP CCP110 ERMN APOE PKP4 FKBP9 PSAT1 MOBP LAPTM4B ANLN CPLX1 THY1 SEZ6L2 STEAP1 TMEM63A OTX2 CRYM HOPX RAB15 PPP3CA LLGL1 TMEM88B NIPA1 BCAP31 SERPINE2 POMP KCNJ10 SPP1 PGK1 ADAMTS20 RNF44 STMN1 C1QBP LAMP2 PHACTR3 DEK CCT5 TMEM86A PGBD5 NREP LRP11 PLA2G7 GGH FAIM	1	141	TTR MAL PLP1 QDPR KCNJ13 DENND5A COX6A1 PVALB SGK1 ASPA CST3 CLIC6 NEFL FEZ1 PCOLCE2 TMCC2 GSTM5 CHCHD10 CMTM5 S100B NDUFA1 DSTN PTGDS CKB NEFM STMN4 HPCA SPARCL1 FTH1 UQCR11 WIPF3 AMPH RPS14 RAPGEF2 NRN1 LYNX1 ALDOC RPL26 PDLIM2 NDRG4 OSBPL1A PLLP PPP1CC ALDH1A1 NDUFS5 CAMK2B CSRP1 NPY NDUFC1 MAP7D1 JTB DYNC1LI2 PIGP PRICKLE2 COX4I1 GPM6B RHOQ NDUFS3 PRDX5 COX6B1 OLFM1 RPL4 GNG11 TMBIM1 CADM4 RA…	5.55112e-16
drug:P2364:ethanol-dn	16984	268	233	39	CP PPA1 PDIA3 GJB2 SFXN1 IGFBP7 GSPT1 HSPD1 GLS2 EBPL TRAM1 PSME4 GM2A SQLE GLDC RCL1 PTPRE DPAGT1 COPB2 PDP2 PSMB2 TMEM38B ITGB5 GNS COPA CLDN12 CHUK TTC39C ELAVL1 CCT8 FPGS ZDHHC9 VAMP7 FAS TTC13 GTF2F2 CMTM6 CALU PTBP1	0.999999	121	GSTM1 DBI ALDH2 CHCHD10 TMBIM6 ERRFI1 C8G GSTZ1 SCP2 EPHX1 STARD10 RPS27L RPL36AL BLVRB RNASE4 ETFB ABHD14B SLC25A5 NDUFA4 VKORC1 ETFA ACSS2 TMEM14C GPT CCS SLC6A13 GRHPR PTTG1IP ALAD RETSAT GSTK1 ALDH1L1 CHP1 UQCR10 EPHX2 SLC25A15 ECHS1 GSTO1 ACADVL HINT1 EDF1 SEMA4A XBP1 ADH5 ME1 IQGAP2 HADHB ENTPD5 HAGH PSME1 RPL37A ALDH6A1 SUCLG2 STBD1 CCDC107 TXNDC15 ZFYVE21 HMGCL SSR2 EEF1D SEL1L SURF4 GABA…	6.66134e-16
drug:P3562:N-nitrosodiethylamine-dn	16984	457	350	69	CYP1A2 SRD5A1 APOA2 FGL1 AMACR ITIH1 MAT1A FETUB C9 SERPINA6 C4BPA APOC1 PAH CRP BAAT APOH HRG AHSG F2 CFHR1 C3 TTPA SLC38A4 F12 HP ITIH2 LIPC C4B FN1 ASS1 PLG AHCY ABCB11 CPB2 RBP4 FABP7 AGT LAMP2 DPYS ADK SLCO1A2 NIT2 PROC HAL AQP9 SLC25A13 KMO LYPLA1 PDIA4 NNMT SERPINF2 ASGR1 IGF1 RCL1 MARC1 SERPINA10 ACLY GLS2 PCSK9 PYGL BST2 CTSC TGFBI HSPA5 SERPINA11 BBOX1 UBD SLC17A2 HES6	0.999994	165	FABP1 A1BG CDO1 HBB HSD17B6 HBA2 HPD RNASE4 PCK1 SULT1C3 BHMT APOC3 ANG PHYH RARRES2 OAT GNMT SERPINC1 PODN RGN FGA AASS NDRG2 FBP1 C8G MSMO1 PIGR ALDOB BHMT2 HACL1 IDI1 APOM CHCHD2 BTG1 ERRFI1 MT2A SULT1A1 ACOX2 PXMP2 TTR TM7SF2 CTH CYP7A1 COX7B GRHPR CHCHD10 INSIG1 F10 DBI ETFB UBB GSTZ1 GHR KLKB1 VKORC1 SOD1 OTC SDC2 ANGPTL3 ADTRP ACADM CPA1 G6PC OAZ1 ALDH6A1 HSD17B4 ACSM1 FMO5 TMBIM6 HAGH C5 …	6.66134e-16
drug:P4275:water|6alpha-methylprednisolone-dn	16984	474	414	77	ASPN TMEM119 GPC3 CLDN1 CDC25B DAO CALCRL ANP32E GJB6 SLC19A3 SLC22A6 ITGBL1 RTKN2 LUM NMUR2 AZIN1 LEPROTL1 TOMM20 IGF2 SLC15A2 CDK4 FMO1 PADI2 PIGA TNNT2 PANK2 COL1A1 SRD5A1 CPZ ALDH5A1 SLC13A4 TASP1 MOB1A COL12A1 SQLE CCDC43 RENBP TMEM86A HNRNPA2B1 HOXB9 PIGM MXRA8 SFT2D2 PPP1R1B ENOPH1 COL1A2 PSMD14 TMEM161A YRDC APLNR GM2A CSPP1 DHX35 ZNHIT6 RBP4 ARL13B GTF2E1 HSD17B7 RBM46 FKBP9 RNF149 TGFBI…	1	188	ALAS2 SLC9A2 CPXM2 PI16 SLC26A7 MFAP4 SULT1A1 DPP4 HBB MFAP5 MYOC DUSP1 AHSP TSC22D3 PKHD1L1 KCNJ13 SLC16A10 KLF2 PMP2 MRPS14 CCDC107 DDC PAMR1 HEMGN DUSP19 SELENBP1 PDE5A ZBTB16 OAT IVD MARC2 ABHD14B ACADM RABAC1 S100A1 DDR2 NPY PTGDS MVD PAQR7 SLC6A13 DPT DCN GCDH EID1 MPZ DHRS1 GSTK1 TST FOS SCOC RNASE4 IFT27 IFI27 NUPR1 RND2 IGFBP6 CPQ OTUD1 SMOC2 ALDH3A1 GSTM5 TCEAL8 IGFBP5 NR4A1 SFRP5 SDHC …	6.66134e-16
drug:P4436:oxygen atom|2-butoxyethanol-dn	16984	452	323	63	HAMP HP MAT1A C3 APOA2 RBP4 PLG AHSG APOE FGL1 HRG APOC1 SAA1 AHCY F2 KNG1 TTPA ELOVL2 INO80 C4B PROC ITIH2 APOF FETUB SERPINA10 GJB2 CXCL1 GRN LAMP2 PAH NNMT SERPINF2 RPL7 HAL CREG1 HHEX SLC17A2 INHBE HSP90B1 SLC38A4 FN1 ASGR1 HSPD1 BCAP31 ITIH1 CPN1 F5 IGF1 HNRNPU OPLAH SLC25A13 CFHR1 MLXIPL PHLDA1 F12 KPNA2 MRPL30 AQP9 NRP1 USP10 POMP PSMA7 PNPO	0.999992	155	FABP1 PLIN2 FGA APOA1 HPD EEF1A1 SERPINC1 TTR CLU RNASE4 B2M CHCHD2 CAT FTH1 ALDOB KXD1 ACADM CDO1 FBP1 APOC3 OAT SCP2 EPHX2 CHCHD10 PHYH OAZ1 CYB5A EHHADH RGN RPS5 NDRG2 GNMT RPS29 HACL1 APOB RPL10A ALDH1A1 HSD17B4 F13B RPL4 RPL26 GABARAPL1 CREB3L3 RETSAT TTC36 RPL18A RPL11 ACOX1 ALDH6A1 PGRMC1 PIGR CMBL MSRB1 ACADVL OSGIN1 HINT1 SLC25A20 GRHPR ETFB BHMT RPL10 GLUL RPS27L AADAC SGK2 UQCRB RPS23 …	6.66134e-16
drug:P5724:bleomycin A2-dn	16984	244	210	36	BPIFA1 HSPA1B TNNI3 GPRC5A TNNC1 TCAP CSRP3 BCL6B USPL1 IVNS1ABP FMO1 MXRA8 MCF2L BAMBI ATP6V1C2 GPC3 MAPK12 DNAH6 HMCN1 KRT7 GRINA PLAUR MYH6 TNFAIP1 KRT18 UPK3B PHLDA1 TNNT2 RAPH1 SLC36A2 CHDH LTBP2 SCEL RTKN2 CLN6 EXPH5	0.999992	112	NR4A1 EGR1 PER1 KLF2 DBP ACTC1 MYL6 ADAMTS1 GPR155 FOS CCDC153 PDK4 HERPUD1 USP2 ATF4 CIRBP GSTA4 ATF3 NCKAP5 SERTAD1 APPL2 ERRFI1 CRY2 ETFB ALAS1 CSRNP1 FLNA DUSP1 MCAM CCPG1 LTF DYNLRB2 PMVK BTG2 BPIFB1 CFD MYOZ2 BAG3 MYL9 PFDN5 NACA PCBP2 PCP4L1 RGCC SLC25A4 ACO2 JUN ECI2 ZFP36 PINK1 PRDX6 IGFBP6 ABHD14B MAP1LC3A PAMR1 NME5 EIF3F TSTD2 TNS1 ITPKB RASGEF1B COQ10B CYTL1 CLU RASL11B NRN1 CEBPD SE…	6.66134e-16
drug:P5304:curcumin|messenger RNA-dn	16984	365	337	63	TUBA1A SCD ATP6V1A HTR2C ENO1 BCAT1 YWHAG MIF CPNE7 NSF CTSB CNP PRKCG ATP6AP1 NETO1 KCNAB2 GMFB ATP6AP2 HSPA5 LAMP2 ITGBL1 MOBP ADD3 SNRPD1 LAPTM4B FKBP1A MTPN SLC6A1 SNX10 FADS2 APOE CCT2 PAFAH1B2 KCTD13 AGT SLC24A2 NOP56 GRINA NCEH1 NRP1 PSAT1 BLCAP SLC6A11 CCT8 HSP90AA1 SULF2 CACNG8 WNT7B MFAP3L LRRN1 SLC25A22 PGM2L1 DOCK9 RPL7 ENTPD6 SPARC KCNG1 CYB5B CSNK2A1 SFXN1 LY6E MAL2 SLC24A3	0.999999	160	PLP1 HPCA TUBA1A GABRA5 GRIA1 UBB ACTB DAD1 SYP RNF14 COX8A ATP6V0C CABP7 LIX1 ITM2C HBA2 DGKG CDC42 NNAT LRRTM1 UQCR11 EEF1A1 WDR1 NEFL CST3 OPCML CD81 TMEM50B GRIA2 PRKCA UCHL1 SGK1 GHITM COX5A ATXN7L3B RPLP1 SLC17A7 ITM2B MAP1B RSPO2 RRAGB SCG2 KIT NDUFB2 COX6A1 GJA1 SLC9A4 NAPA OCIAD1 AQP4 SLC25A11 SNCA UBC GSTM1 PPP1CC PTK2B DYNLRB1 TRPC4 KCTD4 NR3C2 CNR1 GNAI1 CALM3 TMX4 RPL10 NDUFA5 RABAC1…	6.66134e-16
drug:P819:cobamide-up	16984	374	273	43	PAH APOA2 IFITM3 AHSG C3 APOE HRG AHCY SERPINA6 FASN APOC1 KNG1 GLS2 SLC38A4 AMACR RBP4 SDS HP HAMP MAT1A APOF SREBF1 F2 ITIH2 BST2 FADS2 PYGL AGT PLG GRN PGK1 CRP KMO COL18A1 SEC61G RPL22L1 ELOVL2 C9 C1QBP SFXN1 CYP1A2 DHCR7 INO80	1	136	FBP1 ALDOB HPD KXD1 INMT FGA EEF1A1 B2M APOA1 TTR GOT1 RPS29 PHYH RPL10 SULT1A1 ACSL5 SELENBP1 UBA52 FTH1 SDHB SLC2A2 OAT CLU RPL4 SLC37A4 MARC2 UBC RPL3 QDPR IFI27 CHCHD2 APOC3 RPL13 KHK GNMT DBI AADAC COX6A1 TTC36 RPLP2 TAT RPL27A UQCR11 COX7A2 SERPINC1 PCYT2 AKR1A1 ABHD14B COX6B1 RPL18A PM20D1 UGP2 ME1 SLC9A3R1 ETFA FAU RPS8 RPS11 ACTB HAAO NDUFV3 G6PC RPL6 BCKDHB RPL10A FABP1 NDUFV1 LGALS9 RP…	8.88178e-16
drug:P703:dimethyl sulfoxide|pharmaceutical-dn	16984	323	289	52	AHSG KRT18 SH3KBP1 CPB2 TMEM123 BAAT ITIH2 MIF YWHAZ GLDC TSPAN6 CLDN1 UGT2B4 CD24 TRAM1 SRP9 APOH ARL6IP1 HP HNRNPK IFI6 FAT1 PLS3 CREG1 HEXB LAMP2 PROC BLOC1S2 HRG DPYSL2 EIF2S3 ANXA2 DSP FN1 HSP90AB1 C6ORF62 TUBB SLC22A1 IL18 GGH BBOX1 RBP4 POLB TMX1 EPS8 SCD CXCL10 PLK2 BZW1 TUBB3 CFHR1 SPON2	0.999999	142	ALDH1A1 TM4SF4 HPD TTR APOB SLC25A3 ADI1 LGALS4 GSTO1 UBC UQCRQ ECHS1 DCXR SOD1 ETFA MSMO1 SCP2 TUBB2A DCAF6 PIPOX GPX4 ABHD14A NDUFA4 ARL6IP5 DBI NDUFA1 OAZ1 SLC2A2 HIGD1A ITM2B DECR1 TST INSIG1 TDP2 ACTB HSD17B11 LEAP2 SRP14 RPL10 CORO1C PARK7 PEBP1 MORF4L1 RAB8A CES2 PGRMC1 AKR7A3 BCHE NUPR1 HSD17B2 UQCRC1 GRHPR ACAA1 PRDX6 PHYH CA2 NCOA4 RBP5 CYSTM1 AKR1B10 RPS8 RPL34 ADH5 RNASEK C8G SEC31B C…	8.88178e-16
drug:P2793:hormone-up	16984	409	357	61	GPRC5A F2R TUBA1B ANXA2 AGRN TGM2 BGN HP FMO1 S100A11 RPN2 SCARF2 DRAM1 COL4A1 ARAP3 PDPN ICAM1 COL4A2 IFITM3 TNFAIP1 CYB5B NRP1 NPPA ATP6AP1 LOXL1 ARL6IP1 STT3B GPC3 MORF4L2 CCND1 HEY1 DUSP7 ACLY HMGN1 ENG SLC6A6 GLG1 PTK2 CDH5 NCEH1 LAMB3 FKBP1A GJA4 POMP RNF19A PDIA3 KRT7 RAPGEF5 CD47 C4B EDN1 SPON2 IQGAP1 BPIFA1 LLGL2 TACSTD2 ATP6V1C2 FKBP4 PRRC2B GRB7 ATP2A2	1	167	INMT SFTPD RPLP1 SFTPC UBB FTH1 ALDH2 RPL9 RPS20 RPS14 SELENBP1 CTNNA1 ERRFI1 CRIP2 TMBIM6 PRELP TMEM100 PTTG1IP CSRP1 FHL1 GPX3 TSPAN7 ALAS1 MYL4 EIF4H CAV1 SFTPA1 KLF9 PRNP RABAC1 CD81 MFAP4 RPL3 VPS28 SLCO2A1 RGCC CLDN18 SGK1 TXNIP UBC BAG1 FAU ACER2 MYL6 DUSP1 MYLK RPL10 GATA2 SOD1 WBP2 FERMT2 RNPEPL1 EPHX1 SCNN1B ICAM2 RPS8 P4HB HERPUD1 CST3 XBP1 ST5 MYADM LGI3 ZFYVE21 CYP4B1 EMP1 ZFP36 BPIF…	8.88178e-16
drug:P2372:ethanol-dn	16984	268	234	37	IGFBP7 CP GJB2 GLS2 RCL1 PPA1 HSPD1 SFXN1 GSPT1 EBPL PDIA3 TTC39C PSME4 GM2A PDP2 DDAH1 TRAM1 GLDC SRD5A1 GNS COPB2 PTPRE CHUK DPAGT1 TMEM38B CMTM6 NRP1 CLDN12 FADS2 SQLE ZDHHC9 ARL6IP1 PTBP1 FPGS HERC4 ELAVL1 PSMB2	1	121	ALDH2 SCP2 TMBIM6 DBI CHCHD10 ERRFI1 C8G RNASE4 GSTZ1 STARD10 ETFA ABHD14B RPS27L ETFB NDUFA4 SLC25A5 CCS VKORC1 RPL36AL GSTK1 XBP1 GSTM1 GPT PTTG1IP EPHX1 GRHPR ALAD EPHX2 ACSS2 ECHS1 ALDH1L1 CHP1 TMEM14C UQCR10 RETSAT SLC6A13 BLVRB HADHB ACADVL GSTO1 ALDH6A1 SLC25A15 ADH5 SUCLG2 HAGH S100A1 ACTB HMGCL IQGAP2 EDF1 STBD1 CCDC107 MSRB1 ECHDC2 TXNDC15 HBP1 ZFYVE21 CSRP2 SDHB HYI EEF1D HINT1 TMEM120…	9.99201e-16
drug:P3493:ethanol|5-amino-1-(5-phospho-D-ribosyl)imidazole|dopaminium(1+)-up	16984	311	242	35	THY1 CHST1 HSP90B1 C4B TUBA1B ARL6IP1 LRRC58 FOXG1 TMEM132A LAPTM4B IFIT3 IFITM3 HSPA5 GJB6 RNF145 GRINA SLC24A3 SLC2A1 NAA38 CRYM CPT1C DNAJA1 NLK EPHX4 MOBP RPL7 TNNC1 SEZ6L2 RAB15 SYNPR DHX15 ZMIZ2 ATP6AP1 CAMK2N2 GBP7	1	124	PTGDS B2M SGK1 FTH1 RPS27A RAPGEF2 RPS14 IFI27 RTN1 GSTM5 NAP1L5 SYTL2 RPL26 RPL32 RPL31 GABARAPL1 RPL10 ALDOC RPL10A RESP18 NDUFC1 NDRG2 SNPH STMN4 EIF4A2 MAL BNIP3 NDUFV3 MANF NRSN1 SERINC1 RABAC1 INSIG1 CD81 DNAJB9 NDRG4 PENK NUPR1 YPEL3 LY6H FAM107A HLF DBP DENND5A SCG5 NDUFA6 JPH4 HIGD2A ATP6V0C FKBP2 TMCC2 NBEA PINK1 LGALSL FAU JUN ARL6IP5 WASF1 COX4I1 TMEM50B GHITM CDIPT GLYR1 SRSF5 NDUFB3…	1.11022e-15
drug:P5753:dimethyl sulfoxide-dn	16984	355	284	43	PAH APOC1 HAMP HP APOA2 PLG F2 C3 FGL1 ADK ABCB11 ASS1 KRT18 RBP4 ACLY FN1 SLC38A4 TFRC AGT RCL1 IVNS1ABP APOH CRP ASGR1 SERPINA10 RDH16 PROC VMP1 IGF1 FABP7 F12 ITIH2 CFHR1 LIPC DCAF13 DSG2 POLG2 HRG ISG15 IFITM3 AHSG SERPINF2 CLDN1	1	140	SULT1A1 ALDOB BHMT BHMT2 SULT1B1 FGA APOA4 PIGR EIF4EBP3 SLC37A4 DBI GPC4 CDO1 PHYH SLC2A2 ACSM1 CYP27A1 SERPINC1 HPD ERRFI1 C8G TAT IFI27 FBP1 SKP1 MGST2 PDHB RPL13A GNMT CHPT1 GSTM1 SEC61B MGST3 TTR GSTM3 ETFB TUBB2A ATP6V0C UGT2B17 TM4SF4 STRADB RARRES2 COX7B PECR APOA1 COX4I1 GPT LGALS9 APOC3 IL1R2 TSPO ECHS1 MTTP RNF103 HSD17B6 F10 ANG TMEM37 GAMT COX8A CIDEB NDUFC1 SORBS2 TST DPT RPS15A POD…	1.11022e-15
drug:P2559:4,4'-diaminodiphenylmethane|dimethyl sulfoxide|inhibitor|(2Z,3Z)-bis\{amino[(2-aminophenyl)sulfanyl]methylidene\}butanedinitrile-up	16984	290	271	43	OPN3 ALPP NKX2-1 FBN1 PNMA2 SLC38A4 CDH11 CFHR1 NTM MEGF6 GPNMB TRIB2 LMCD1 GABRE SLC5A3 WNT5A SCD DPYSL2 PHTF1 G6PD FADS2 GNE FAT1 PLXNA3 TNS3 CD55 IFITM3 NREP ABCA7 FZD2 S100A3 SPARC ISG15 DAB2 TSGA10 POLM CUL4B SREBF1 DHCR7 FASTKD1 LPCAT1 NRP1 LRRC37A2	1	135	CYP1A1 AKR1C3 ID4 AKR1C2 RNASE4 LARP6 ABCG2 RGL1 EDIL3 LMO3 LIMCH1 ID3 NR3C1 ID1 SECTM1 SMARCD3 SELENBP1 PMP22 LSS MVP AHNAK2 SLC25A1 SULT1C2 GNAI1 CA11 ABCA8 ACYP2 OLFML2A CYP39A1 PINK1 SLC22A18 TGFBR3 SYNC NDRG4 RABAC1 DENND3 GSTA4 TGFB1I1 CTSO GSTM4 SLC25A23 PCYOX1 RAB4B DDX60 RCAN2 ARMCX1 AMT HCFC1R1 PNRC1 ACSL1 ST3GAL5 FHL1 MALL VIPR1 HPGD PPP1R3C PDGFD NBEA FUCA1 TMEM140 MRPS6 PDE9A LRRC23 …	1.11022e-15
drug:P4448:oxygen atom|2-butoxyethanol-dn	16984	479	352	69	APOA2 APOE PLG APOC1 RBP4 HAMP AHSG C3 F2 PAH APOF HRG TTPA C9 KNG1 AHCY MAT1A HSD3B7 SERPINF2 PROC ITIH2 CYP1A2 HP C4B SAA1 FETUB ELOVL3 SLC38A4 CRP AGT ASGR1 ITIH1 SERPINA6 ELOVL2 FGL1 ABCB11 GLS2 SERPINA10 HAL F12 COL18A1 IGF1 GJB2 LAMP2 SLC22A1 LIPC RCL1 NIT2 MREG MARC1 CFHR1 SCO2 F5 HSPA1B SERPINA11 KRT18 SLC17A2 MLXIPL GLDC AMACR ASS1 LACTB2 SLC25A13 PERP DIO1 APOH AQP9 PPA1 PROZ	0.999996	165	APOA1 TTR APOC3 FABP1 BHMT FGA HPD SERPINC1 ALDOB CDO1 GNMT FBP1 PGRMC1 APOB RGN PHYH ALDH1A1 PIGR CLU C8G CTH CHCHD10 RNASE4 TTC36 STARD10 HERPUD1 RNF125 NDRG2 PLIN2 ANGPTL3 GABARAPL1 QDPR AADAC EPHX2 ERRFI1 NRN1 CAT DBI APOM HACL1 INMT KLKB1 GSTZ1 REEP6 SLC2A2 CYB5A GSTA3 METTL7B ANG DMGDH HAAO FXYD1 ALDH6A1 MARC2 ACADM VKORC1 MAOB TMPRSS6 P4HB EPHX1 ACSM1 F13B NDUFA4 NDUFA1 SAR1B SELENBP1 GHR …	1.11022e-15
drug:P3543:ethanol|5-amino-1-(5-phospho-D-ribosyl)imidazole|dopaminium(1+)-dn	16984	343	276	37	PMCH HSP90B1 HSP90AB1 GJB6 C4B PLA2G7 MOBP SEZ6L2 SLC12A2 PKP4 ANLN HSPA5 ANKRD34B CCP110 LAMP2 SLC2A1 ERMN SERPINE2 ADAM9 CTNNB1 PSAT1 ARL6IP1 POMP FASN HEXB CANX LUC7L3 NDRG3 PFDN2 KCNJ10 SEC61G CNP ZC3H11A PDIA4 PSMD14 LHFPL3 PPP1R1B	1	137	SGK1 PTGDS MAL GLUL ACTB CSRP1 GABRA1 MANF ALDOC UNC13C PLP1 GSTM1 CST3 GSTM5 UQCRH ABHD4 DNAJB9 FKBP2 RPS14 COX4I1 VTI1B CNTN1 CHCHD10 DYNLL2 RTN4 ISCU GSTA4 RHOQ CYB5A PPP1CC TIMP4 ALDH1A1 MID1IP1 GABARAP SERINC1 OSBPL1A RPL10 GJA1 FTH1 GPR37L1 FAM107A RPL36AL NDUFA2 MARC2 DBI P4HB RABAC1 KCNMB4 GNAI1 COX6A1 SCN4B ME1 RHOU NDUFA6 SIRT2 FOS TMX4 SDF2L1 GOT1 DYNC1LI2 SULT1A1 DENND5A PHYH CERK SLC…	1.11022e-15
drug:P3358:-up	16984	423	366	67	APOE VCX IFITM3 APOC1 FSCN1 LY6E SEC61G EIF4A3 CTSK MAGEA4 MLANA TBC1D16 PSMC1 GTF3A SCD GPNMB TUBA1B PPT1 TOP2A SPARC KDM1A ATP6V1A TUBA1A SET CYB5R2 CDC25B HES6 RENBP PSMA4 CLCN7 TUBB3 RAI14 TNS3 CHAMP1 SLC45A2 TYMS ATP6AP2 CREG1 AMOT GM2A F2R ENOSF1 ENO1 GNPDA1 ATP6AP1 SMS SNRPG PSMB2 IFI6 SNAI2 FAM167B HNRNPD GNS PDE12 ARGLU1 ACTR2 SERPINE2 ACP5 RRM1 IGFBP3 YTHDF2 PTPRG XXYLT1 RAN PSMD14 PASD…	1	170	PDHB CHCHD2 CD81 TNFRSF14 NBL1 TPT1 EMP1 ARL6IP5 FTH1 COX7A2 CNDP2 UBB NDRG1 DBI DCT COX7C HINT1 CYP27A1 COX5B EEF2 NDUFA1 CIRBP OAZ1 RPS8 RPL15 TMEM59 B2M GPX4 NDUFB3 RPL27 NDUFS5 ALKBH5 CALM2 NDUFA4 RPL4 RPS13 P4HB RPS14 RPL13A COX6B1 MYL6 PTTG1IP RHOA QDPR CHCHD10 RPS20 SOD1 RPL3 COX4I1 PARK7 COX7B COX8A RPLP1 HEBP1 RPL26 EIF4A2 SLC25A6 COX17 EIF3F DNAJC8 RPS3A AP1S2 MYL12A RPL35A SUCLG2 ARHGD…	1.22125e-15
drug:P2717:-dn	16984	250	219	31	C4ORF46 ADD3 GPR137B CRISPLD1 PPT1 ARL6IP1 SEMA5A FAT1 PABPC3 LAMP2 BBOX1 NPM1 SYNPR LHX2 THBS2 IFIT3 SERINC5 AEBP1 GABBR1 AGT FJX1 SPARC ADAR TP53BP2 SOX9 VGLL4 EXOC1 ITGAV AP2B1 DPYSL2 CLSTN1	1	115	ATP1A2 RPL3 FTH1 HEPACAM GABARAPL2 SPARCL1 MXI1 MT3 RTN1 SCG2 SERINC1 OAT VAT1L PTGDS RPS20 PMP2 GABARAP ARHGEF6 RPL23A MSMO1 SLC9A6 FAM107A C3ORF70 LRRC3B TCEAL2 CA14 WIF1 CD99 CDIPT HADHB UBA52 CPE RPL36AL GPM6B SLC25A3 ISCU TPT1 CNRIP1 SOD1 PEBP1 LMO2 TUBB2A PTTG1IP TMEM14A SGCE GPM6A NCOA4 ITM2B HSPA2 DCAF6 SYT4 EEF2 IRF2BPL CHMP2A CAMLG TERF2IP TSHZ1 SETBP1 MEIS2 PCDH9 RPS11 RPL4 CD81 PFKM P…	1.22125e-15
drug:P2976:cadmium atom|chromium atom-up	16984	422	344	61	HAMP FABP7 LAMP2 HSPD1 SERPINA6 APOA2 MORF4L2 BAAT HES6 AHSG IGFBP1 SERBP1 CTSB NCL HSP90B1 CCT4 SLC38A4 PTGES3 CFHR1 GLS2 POMP RBP4 GNL3 PCSK9 DHCR7 PSMA7 NNMT SLC22A1 PSMA1 RAN SERPINA10 INHBE NPM1 FAM120A ITIH2 TCP1 ELOVL2 MIF AHCY PSMA4 TGFBI LTBR GPNMB FETUB ZWINT TUBA1B UGT2B10 IFI30 IVNS1ABP TMEM33 NUDT19 PDCD5 CLTC CAND1 HMGN1 C1QBP M6PR TGIF1 BST2 PPA1 LGALS8	1	162	CTH PHYH AKR7A3 OSGIN1 RPS20 ALDH1A1 RPS23 RPL4 RPL5 RPL26 COX5B GSTA1 MSMO1 SULT1B1 RPL31 RPL15 RPS6 FAU RPS9 APOA1 RPS3A PECR NFE2L2 HPD EPHX1 DECR1 RPS29 ACADL RPL6 MT2A RETSAT ACADM RPL11 CNBP RPS15A RPL13A MGST2 RPL18 RPL27A RPS27A RPL34 IDI1 RPS8 VDAC2 CMBL UGP2 SMPDL3A RPL10 EEF1B2 RPS5 RPS15 GSTA5 BTF3 RPL23A RPL9 FMO5 ACOX2 FBXO3 ALDH9A1 RPS14 GHITM ATF4 PTGR1 NDUFS2 RPL18A ADH5 CREB3L3 …	1.22125e-15
drug:P2371:ethanol-dn	16984	235	209	33	CP IGFBP7 GJB2 GLS2 RCL1 SFXN1 HSPD1 GSPT1 EBPL PDIA3 TTC39C PPA1 PSME4 GM2A PDP2 TRAM1 GLDC SRD5A1 PTPRE CHUK DPAGT1 TMEM38B GNS CLDN12 CMTM6 NRP1 COPB2 FADS2 ZDHHC9 CARHSP1 PTBP1 ELAVL1 FPGS	0.999999	111	ALDH2 CHCHD10 SCP2 DBI TMBIM6 ERRFI1 C8G RNASE4 GSTZ1 STARD10 ETFA ABHD14B RPS27L ETFB SLC25A5 NDUFA4 CCS GSTM1 VKORC1 PTTG1IP XBP1 GSTK1 RPL36AL GPT EPHX1 GRHPR ALAD EPHX2 ECHS1 TMEM14C ALDH1L1 ACSS2 RETSAT SLC6A13 UQCR10 CHP1 BLVRB ACADVL HADHB ALDH6A1 SLC25A15 GSTO1 ADH5 HAGH S100A1 SUCLG2 ACTB HMGCL IQGAP2 ZFYVE21 MSRB1 STBD1 HBP1 CCDC107 ECHDC2 HYI CSRP2 DCXR PPM1K ENTPD5 SDHB TMEM120A SLC25…	1.33227e-15
drug:P2678:metformin-up	16984	356	277	43	AHSG HP APOE HAMP APOF ASS1 APOA2 MAT1A PPA1 ASGR1 APOH SEC61G SERPINF2 MORF4L2 HSP90B1 RBP4 FCER1G CPB2 RPN2 IFITM3 ITIH2 MIF PCSK9 F2 ADK EBPL ACLY POMP KNG1 BHLHE40 CYB5B PGM2 KRT18 IGFBP1 FETUB ITIH1 ABCB11 SOD2 HSPA9 CCND1 UROC1 PROC SERPINA10	1	137	APOA1 TTR FGA APOM FBP1 RNASE4 UQCRH UQCR10 ACADM COX5A RPS11 GSTZ1 RPL36AL RPL9 SULT1A1 G6PC APOC3 P4HB CHCHD10 COX4I1 ALDOB ERRFI1 COX6B1 INMT TBCA CYB5A RPLP1 UQCR11 UQCRC2 RPS27L ETFA NDUFA4 VKORC1 TMBIM6 NRN1 RPL27 ALDH2 SEC13 SLC25A5 DBI TMBIM4 HINT1 HIGD2A POLR2L UBL5 NDUFA2 SPCS1 BHMT SSR4 NDUFA7 ETFB HERPUD1 NDUFA6 APOB NDUFA1 KRTCAP2 EGR1 RPL10A SSR2 SGK1 RPS9 GRHPR F10 COX6A1 RPL29 FCG…	1.55431e-15
drug:P2790:hormone-up	16984	462	364	65	APOA2 APOC1 APOE MAT1A AHSG HP ASS1 CYP1A2 C3 HSD3B7 CYP7B1 CYB5B ITIH1 ASGR1 APOF AQP9 MIF SLC22A1 HAMP IFITM3 CRP ADK F2 SERPINA10 SERPINF2 PROC HAL C4B UROC1 GLS2 POMP FETUB RPN2 DDAH1 KNG1 GRB7 ARL6IP1 GLDC HSPA9 SDS ACLY IGF1 CP PPA1 NNMT HSD17B7 FMO1 GDF15 SOD2 AGT F12 LAMP2 GRINA GSPT1 PLG ITIH2 RGS16 CPB2 RCL1 ABCB11 APOH SLC17A2 GM2A CPN1 EBPL	1	169	APOC3 APOA1 TTR FGA ALDH2 GNMT ERRFI1 RPLP1 TMBIM6 OAT FTH1 CLU G6PC CHCHD10 P4HB INMT C8G GSTZ1 SOD1 UBB RARRES2 NDUFA4 ANG RNASE4 ACSL5 HERPUD1 RETSAT ABCD3 GLYAT HPD ABHD14B EPHX1 HAAO CDO1 RPL36AL PTTG1IP CCS CYP27A1 ALDOB SLC25A5 ETFB KHK COX6A1 TTC36 RPS27L UQCR10 WBP2 RPS20 HSD17B4 RPL9 PARK7 COX5B F10 GRHPR UBC FBP1 COX8A UQCR11 RPS14 SELENBP1 BHMT2 NDUFA6 SLC6A13 GSTK1 EGR1 COX6B1 COX4I1…	1.55431e-15
drug:P100:1-methyl-4-phenyl-1,2,3,6-tetrahydropyridine-dn	16984	339	288	52	IFITM3 CNP CLSTN1 SH3YL1 ENC1 PCDH17 NBPF10 YWHAB GGCT SLC1A3 ZIC1 MZT2B C4ORF46 ORC3 BTBD1 CREG1 ORC6 HSPA5 MRPL3 NUAK1 PTPRO STRAP CCNB1IP1 KIAA0319 TRIM37 CCP110 HAUS2 ADD3 HOMER1 CST5 PRC1 PTDSS1 NDRG3 COL16A1 OSGEPL1 PPA1 GALNS AP3M2 RCN2 CLK2 LAPTM4B BHLHE41 ZNF365 LRRK1 TOMM20 TDG ARGLU1 SCN2A ITGAV CCT6A TTF2 ENTPD6	0.999999	141	TUBB2A NDUFC1 RASA4 RPS15 MLLT11 VPS35 NAP1L3 C14ORF132 SPARCL1 CCK RTN1 CBX7 PLP1 SOD1 CHL1 GRIA2 UQCRB EIF1B RPS29 B2M DYNLL1 GALNT6 QDPR NDUFB4 LMO3 CYB5R3 MXRA7 SERPINI1 TSPYL4 FAU MT1M HIGD1A MZT2B CCNI SATB1 PEBP1 SNX3 MOAP1 MUL1 SCG5 RCAN2 EIF3L ATP1A2 B3GAT1 PNMA1 DNAJC24 MT1E MICAL1 COX7A2 GHITM RPL10 MAL PPP1CC CHMP5 WASF1 NAP1L2 OAT PTPRZ1 PARK7 NEFL TSPYL1 RPL37A CCDC92 AK5 MORF4L1 UQ…	1.66533e-15
drug:P3525:ethanol|5-amino-1-(5-phospho-D-ribosyl)imidazole|dopaminium(1+)-up	16984	383	299	42	C4B PHACTR3 DDN ARL6IP1 GAD1 KRT18 MOBP SERPINE2 STEAP1 INO80 GJB6 TMEM237 SLC24A3 DZANK1 SPP1 ANKRD34B PSMD12 PPP3CA FAM49B CHST1 OTX2 THY1 RPL22L1 SLC2A1 FOXG1 CUL4B C1QBP MOSPD1 TMPRSS11A PSMD14 PSMB2 CPT1C IFIT3 BCL11B ADAM9 MCF2L ECEL1 RASGEF1A AGT PPP1R1B CPLX1 TNK2	1	145	B2M PTGDS PENK SGK1 SCG2 IFI27 NAP1L5 KCNJ13 CLIC6 NEFL GAP43 ZCCHC12 PLIN4 WFS1 NDUFA4 RPS14 GABRA1 FAM107A SULT1A1 ALDOC CIRBP ISCU LY6H SST MAL GOT1 RESP18 WIPF3 ITPR1 SLC4A10 SCG5 RPL32 CDKN1A FAU ZCCHC18 RPL3 ITM2C NRSN1 PRNP NDUFV3 NDRG2 GLRX5 RPL10A MANF RPLP1 PINK1 SRSF5 UNC80 UQCRC1 NBEA BNIP3 VSTM2A MAP7D2 GABARAPL1 GSTM5 EIF1B STMN2 SDHB PLCXD3 NEFM RDH5 SMPDL3A CTXN2 CKB NPY2R PGRMC1 …	1.77636e-15
drug:P3528:ethanol|5-amino-1-(5-phospho-D-ribosyl)imidazole|dopaminium(1+)-dn	16984	388	315	55	HSP90B1 C4B HSPA5 STEAP1 HSP90AB1 STMN1 MOBP ANLN DNAJB11 PSAT1 SEZ6L2 ERMN CNP PDIA3 LAMP2 GJB6 PLA2G7 CCP110 CRYM PPP3CA DNAJA1 PKP4 PSMD14 NIPA1 OTX2 LRRC58 CHORDC1 KRT18 SEC61G IFITM3 LRP11 TMEM237 PDIA4 SYNPR POMP ADAM9 SPP1 RAB15 CCT5 HSPA1B DDIT4L KCNJ10 TMEM63A PTGES3 GGH LAPTM4B FKBP9 NLK DDN SREBF1 CANX IFIT3 ELOVL7 STEAP2 VAMP7	1	151	IFI27 MAL SGK1 TTR ALDOC NDRG4 MANF SDF2L1 FTH1 DENND5A PTGDS PLP1 RPL10 B2M FKBP2 RPL36AL ALDH1A1 HINT1 CKB OSBPL1A P4HB KCNJ13 EPHX1 GLUL PVALB GSTM1 ARL6IP5 NDUFV3 FEZ1 GSTM5 GPX4 ME1 HPCA GSTA4 CLIC6 SLC35B1 PPP1CC ASPA ATP6V0E2 OLFM1 SERP1 COPE GABARAPL1 RPL26 COX6A1 CYB5A OAT NRN1 NDUFA1 DUSP1 SNAP25 CSRP1 ACADM RRAGA PAIP2 OXT NAP1L2 RTN4 TPPP BNIP3 NEFM RAPGEF2 DERL3 GNAI1 CALM1 BLVRB AMP…	1.77636e-15
drug:P5186:titanium atom|titanium dioxide-dn	16984	193	143	20	PAH BBOX1 TTPA MAL2 KRT23 GLDC SLC36A2 MRAP SLC38A4 SERPINA6 SEC14L4 FABP7 DNASE2B AMACR CD163 SLC25A13 GJB2 GLS2 UROC1 MCTP2	0.999997	84	RGN AASS TSPAN12 MAOB FABP2 ACOT12 S100G PHYH FAM47E LYVE1 CTSG ENTPD8 ACSL1 CMBL ALDH6A1 ABCA6 EHHADH KLKB1 SH3BGRL2 CROT ABCD2 GGT6 IGSF1 SLC39A5 CAT SCP2 ENPEP SLC16A12 CIDEC EPHX2 PLIN5 CRB3 SDR42E1 RETSAT GAL3ST1 CD163L1 VNN1 SLC23A3 SHBG MTTP CIDEB SLC16A7 AQP11 CYP7A1 GSTK1 ACADL ACADM NKAPL SFTPD TMEM37 PPP1R3G TMEM25 HSDL2 ALDH3A2 ATP2B2 ACOX1 FOXA3 ENTPD5 KLF15 ACADVL CPT2 TPPP PPM1K DC…	1.77636e-15
drug:P2377:ethanol-dn	16984	303	267	39	EBPL NUDT19 SLC6A6 GSPT1 IGFBP7 SRD5A1 DAP3 HDGF FADS2 PTPRE COPA MFN1 RANBP1 CD47 ALS2 TRIM28 TULP4 ETS1 NAA10 UBE2Q1 POLRMT KANSL2 CBFB GET4 ADRM1 CNOT7 LSG1 VKORC1L1 BMP1 NIPBL FBRSL1 SBK1 HNRNPA1 AKAP9 WDR5 FGFRL1 FARSB ZDHHC9 STAT3	1	133	CHCHD10 TMBIM6 COX6A1 CHP1 ERRFI1 EDF1 GSTK1 ME1 GSTM1 NDUFA5 ETFB TMEM14C PTTG1IP HINT1 RETSAT NDFIP1 ETFA ACTB ACSS2 ALAD NDUFA7 XBP1 NDUFS8 NDUFV3 DAD1 DBI STARD10 SEMA4A BTF3 G3BP2 HAGH HMGCL VKORC1 LAMTOR1 COX7A2L ECHDC2 EEF1B2 EEF1D PRNP SOCS2 NDUFB8 S100A1 GRHPR ADH5 FKBP8 SSR2 RPL29 ACADVL PPP1CA SEC22B TSPAN31 EPHX2 FIS1 EIF3F MRPL53 SMARCA2 GPT ECHS1 RNASEK RNF181 RPS9 CXXC1 SLC6A13 SLC…	1.88738e-15
drug:P5727:bleomycin A2-dn	16984	275	220	31	TNNC1 CSRP3 TNNI3 TCAP BCL6B NT5DC2 SLC43A3 MYH6 C3 TIE1 FMO1 TNNT2 PTTG1 TOMM34 FHOD1 ATP6V1C2 DNAJC7 KIN BAMBI IGFBP3 NOTCH3 PSMC1 SLC36A2 CHST1 ANKRD1 GXYLT1 MXRA8 MYLK4 CHDH SCEL HLX	1	115	EGR1 NR4A1 TAGLN ACTC1 MYL9 KLF2 DUSP1 FOS CSRNP1 PER1 ADAMTS1 ERRFI1 FLNA IGFBP6 ACTG2 NFKBIA MYL6 BTG2 ATF3 CLDN5 USP2 PDK4 DBP PAF1 NDRG2 SERTAD1 CEBPD JUN TPM2 CD79B FXYD1 KCNE4 CNN1 CIRBP INMT KLF11 ITPKB GPX3 RASGEF1B DECR1 ZFP36 PGM5 MYOZ2 DPEP1 CRY2 MYH7 ATF4 TNNT3 RPS5 CTDSP1 GPIHBP1 PCOLCE2 CDO1 XDH CCDC153 GABARAPL1 CD69 PRICKLE2 SELENBP1 CD19 PPP1R14A DGKA CRISPLD2 HSPB6 SURF1 CYP4B1 …	1.88738e-15
drug:P2977:cadmium atom|chromium atom-up	16984	357	291	51	FABP7 BAAT HSP90B1 IGFBP1 COL3A1 APOH CRP C4BPA CP CPB2 ITIH2 SLC38A4 GLS2 GNL3 HSPD1 HP MAT1A PAICS HES6 GPNMB IFITM3 FGF21 CTSB PLS3 INHBE MIF STT3B COL1A2 ACSL4 TMEM123 CTSC LAPTM4B HSD3B7 HAL CANX PSAT1 TGFBI RPL22L1 TGIF1 COPB2 VAMP7 IVNS1ABP C1GALT1C1 EFNA1 ASS1 GNE GNAI3 NIT2 ASGR1 ONECUT1 AMACR	1	142	CTH UGP2 MT2A PCK1 AKR7A3 OSGIN1 ERRFI1 G6PC FBP1 ALDOB ZFP36L1 ACOX2 PHYH RPL4 RPS29 NFE2L2 RPS9 SERPINC1 RNASE4 KLKB1 RPL6 GHITM ATF4 PPP1R3C RPS23 GSTM1 RPS6 RPL11 RPL26 NDRG2 EPHX1 OTC CMBL ACADM HBB FBXO3 SERP1 RPL15 RPL5 RPL9 RPL10 BHMT2 XBP1 SMPDL3A SLC2A2 RPL34 MGST2 CDO1 DECR1 VDAC2 RETSAT ALDH6A1 NR0B2 SUCLG2 ANG ENPP2 RPS20 RPL23A RPS27A GHR FMO5 RPS15A RPS11 ECHS1 MARC2 RPL29 SDF4 CD5…	1.88738e-15
drug:P3143:-up	16984	288	249	36	SEC61G TYMS TYRP1 MIF KPNB1 MORF4L2 SNAI2 ENO1 SCD ZZZ3 GTF2F2 RANGAP1 MLANA GPNMB HEXB PRDM7 TUBA1C CDK2 CDKN3 PSMC1 SLC45A2 OCA2 ASPM TUBA1A TNS3 SH3BP4 PAFAH1B3 PSMB2 HMMR KANSL3 TTYH3 RRM2 GNPDA1 UBE2T SNRPG BCAP31	1	126	RPL31 RPL27A RPS20 RPS11 COX7A2 NDUFA4 RPS6 RPL4 UQCRQ RPS25 NDUFA1 COX5B OAZ1 COX7C RPS3A RPS27A NDUFS5 RPL27 RPS13 COX7B OST4 COX8A RPL35A ACTB COX17 COX6B1 B2M NDUFB2 RPS15A CALM3 ATP6V0E1 SLIRP NDUFS8 RPS5 COX4I1 CHCHD2 BCL2L13 NDUFA11 CHCHD10 ATOX1 PFDN5 NDUFA2 NDUFB8 ID3 RPS15 NDUFB5 SDHB RPL26 EMP3 NDUFB3 NSA2 RPS8 TMEM59 PARK7 UQCRH SEMA6A PIR RPL6 TBCA HINT1 EIF3L NQO2 RPL36AL ALKBH5 CIR…	2.22045e-15
drug:P5783:dimethyl sulfoxide-dn	16984	388	313	53	FETUB AHSG FN1 HRG PAH C3 ASS1 APOA2 FGL1 APOC1 BST2 PLG AGT CYP1A2 APOH SERPINA10 PROC ITIH1 IGFBP1 KRT18 RCL1 IFITM3 HP AHCY ACLY CTSB IPO7 S100A10 SEC61G RBP4 CPB2 HMGN1 IVNS1ABP FABP7 SLC38A4 F2 ADK C9 ITIH2 GPI SERPINA11 MORF4L2 CFHR1 ENO1 LOX SERPINF2 HAMP POLG2 DSG2 RPL22L1 C4BPA FAM120A HSP90B1	1	150	FGA ALDOB EIF4EBP3 CYP1A1 SULT1A1 CITED2 SLC2A2 SLC37A4 CYP27A1 ANG BHMT UGP2 C8G BTG1 SERPINC1 TUBB2A RNASE4 VKORC1 PTGR1 UGT2B15 PIGR IFI27 ACTB XBP1 SEC61B PGLYRP1 APOC3 GSTM1 CALM2 MANF APOA1 TAT CDO1 ATOX1 GNMT CTH ABCC2 NIPSNAP3B GAMT RPL10 ZFP36L1 DPT FTH1 MGST2 ATP6V0C RPL31 GPC4 HPD APOA4 RPS29 BHMT2 TMEM37 RPL27 MGAT2 NPY MT2A RPS5 RPLP1 SKP1 GSTM4 ETHE1 SPINK1 BTF3 RPS25 RPS15A ERRFI1 …	2.22045e-15
drug:P5793:dimethyl sulfoxide|methapyrilene|hydrogen chloride-dn	16984	294	236	37	PAH UBD AHCY CRP ACLY RBP4 BBOX1 F2 HSP90B1 C3 IGF1 ADK ABCB11 NIT2 BAAT HRG NDUFA4L2 SHMT2 PSAT1 RCL1 SERPINE1 MAT1A F12 DHCR7 VMP1 TTPA PROC ASS1 CUL4A FN1 HSPA5 CPB2 C4BPA DPYS MIF GJB2 SOD2	1	121	BHMT BHMT2 SULT1B1 SELENBP1 CYP1A1 SULT1A1 PHYH PECR ACSM1 TM4SF4 ALDOB SLC25A4 MGST3 DECR1 EIF4EBP3 CDO1 FBP1 SLC37A4 ALDH1A1 UGP2 GAMT GSTA4 GSTA3 HPD CHPT1 UGT2B17 GNMT CYP27A1 ACADL CYB5A HSD17B11 CMBL ITM2B BPHL PIGR CAT ALDH3A2 HIGD1A ADTRP FGA CD36 EPHX1 HERPUD1 UGT2B15 P4HB HSD17B4 PODN RNASE4 ALDH1L1 PDHB ECHS1 STARD10 GSTM4 PPA2 ANGPTL3 RARRES2 GLRX SLC25A20 STAP2 FABP1 ECI2 ACSS2 EPHX2…	2.33147e-15
drug:P4019:retinoic acid-up	16984	543	493	113	COL1A1 S100A10 TIMP1 ANXA1 TGFBI STC2 IGFBP7 SERPINE2 CDK2AP1 GREM1 DKK1 COL1A2 ENO1 PABPC1 CALU TNFRSF11B PRPS1 CCND1 DAB2 OXTR KRT34 DPYSL2 SERPINB2 THY1 TUBA1C ATP6AP1 LUM TPD52L2 CTHRC1 MFSD10 POLD2 MYOF NAA38 CDH11 POMP VASN PPP1R14B POLR2A HMGN1 PPA1 G3BP1 EBNA1BP2 TFRC TUBA1B SERPINE1 GLG1 TMEM200A FSCN1 SNRPG PTBP1 PDGFRB COL4A1 COL5A2 BCAP31 IGF2R ACTR2 PIK3R2 SRSF1 HEXB MTHFD2 RHBDF1 GT…	0.999787	214	TPT1 OAZ1 RPS29 MYL6 IGFBP5 MT2A RPL5 RPS6 RPS25 UBA52 MT1A CD81 EEF1A1 DUSP1 EIF4A2 UBC EGR1 RPS24 NDUFB2 CALM2 RPS14 RPS11 KLF2 MYL12A ACTB UQCRQ COX7A2 ID3 FOS UBB PLAT COX8A RGS4 RPLP2 DYNLL1 NDUFB8 FERMT2 GLRX COX4I1 SERF2 PRDX6 NCOA4 REXO2 CRYAB HINT1 ID2 SOD1 EMP3 PARK7 RABAC1 EEF2 ADI1 SNX3 PRNP DCN TBCA CDH2 MTCH1 RPS27L NDUFA1 FAU RPL11 NQO1 NOP10 CCL2 PRSS23 COX5B B2M NIPAL3 VDAC2 RPS1…	2.44249e-15
drug:P5761:hydrogen chloride|dimethyl sulfoxide|chlorpromazine-dn	16984	292	231	33	PAH BBOX1 ACLY HRG CRP RBP4 ADK HSP90B1 NDUFA4L2 APOH HMGN1 HP LOX BAAT DHCR7 ABCB11 RCL1 IGF1 TTPA VMP1 UBD NIT2 C4BPA MAT1A HSPD1 FABP7 CPB2 HNRNPH1 RDH16 HNRNPK SLC25A13 MTHFD1 DCAF13	1	119	BHMT SULT1B1 PECR SULT1A1 ALDOB BHMT2 ACSM1 CYP27A1 DECR1 EIF4EBP3 MGST3 TM4SF4 CTH SLC37A4 ANGPTL3 CMBL SELENBP1 GNMT SLC25A4 UGP2 CDO1 PIGR CHPT1 PHYH FBP1 RARRES2 ALDH3A2 UGT2B17 ALDH1A1 BPHL GAMT ADTRP GSTA3 CAT MGST2 UGT2B15 PODN TSPAN12 HPD CD36 PXMP2 PGRMC1 SORBS2 HSD17B11 HSD17B4 EPHX2 ECHS1 SLC2A2 GSTM3 BTG1 FABP1 TSPAN7 MYL12A ETFDH MGAT2 ALDH6A1 CRYAB DMGDH NDUFB9 MDH1 MARC2 SEC22B RNA…	2.44249e-15
drug:P3484:ethanol|5-amino-1-(5-phospho-D-ribosyl)imidazole|dopaminium(1+)-dn	16984	280	218	30	ATP6V1A HSP90B1 PLA2G7 BHLHE40 GJB6 TRIM32 FAM81A DZANK1 HSPA5 CCP110 CHST1 SPTAN1 LAMP5 ATP6V1C1 KDM3A DNAJB11 SLC25A14 ASAH1 OSBPL8 MORF4L2 TIMM17A CHORDC1 NIPA1 PSAT1 STMN1 IFIT3 NAE1 C4B SEC61G SUGT1	1	114	EGR1 ARC DUSP1 NEFM SPARCL1 SGK1 PINK1 CALM1 FOS MAL NR4A1 ALDOC NAP1L5 MANF PTGDS UNC80 FAM107A HINT1 RPL23A B2M GPM6A FBXW7 EEF1A1 NEFL SCG5 RPS23 SLC25A18 DNAJB9 NPTN TSPYL4 GLUL SRP19 ALDH1A1 NDRG2 HLF NAP1L2 GSTM5 VDAC2 NDRG4 SCN4B NDUFB5 ABHD4 OAZ1 CHCHD2 SCOC TPPP DCTN3 PPP1CC OSTM1 NACA MAP7D2 EIF1B UBE2E1 ACYP2 VIP NRN1 GRIA2 PRNP ARL3 COX6B1 RPL27A GRIA3 PFDN1 AURKAIP1 JTB PAIP2 KLF10 N…	2.44249e-15
drug:P4008:ethanol|17beta-estradiol|streptomycin|penicillin|puromycin-up	16984	443	360	57	TIMP1 SPARC IFITM1 RPL7 MDK COL6A3 COL3A1 COL4A2 OLIG3 NPM1 MXRA8 IFITM3 CTSB DKK1 LRRC8E DVL3 DNMT3L ILF2 SERPINE1 HELLS SPON2 PSMB2 CKS2 SOX4 APOH NOM1 PSMA4 CNTROB SNRPB FAM186A ECM1 ARPC5 CALU ISG15 PCOLCE B4GALT5 LHFPL5 HMGB2 LRRC20 SLC1A5 GALP MLEC CHST13 BCAP31 PLEC PLCG1 KDM5B PLAUR MTDH PSMC4 PSMD3 CNOT7 VASN RNF24 THY1 WNT8B SLC35B2	1	167	RPL34 RPLP2 B2M IGFBP6 RPL37A RPL18A RPL18 MAMDC2 RPS13 EEF2 RPL32 RPS14 CDKN1A DYNLL1 RPLP1 RPS9 TPT1 SSR4 GUK1 RPL4 RPL29 RPS24 RPL27A TPM2 CD63 TOMM7 MYL6 NDUFA1 RPL3 COX7C RPS15 PFN1 UBC EIF4H RPL6 EEF1B2 CFL1 RPL27 EEF1A1 PHPT1 RPL36AL TAGLN LRP10 ZFP36L1 RPL13A RARRES2 RPL36 SOD1 NDUFA4 NSA2 PHB2 EIF3L NDUFS5 TMEM59 POLR2L EDF1 PRDX5 DYNLRB1 COX4I1 AQP10 LGALS3 EIF3F HCFC1R1 SPCS1 EMP3 NDUF…	2.44249e-15
drug:P2662:-up	16984	296	218	35	KRT15 S100A11 C3 SBSN APOE TUBA1A RETN TCAP FAR2 LGALS7 LY6D TUBA1B SHISA2 TGFBI HSP90AB1 IGFBP3 INO80 FXYD5 LUC7L3 GJB5 COL3A1 KRT23 PERP FUS BCAP31 SERPINB2 ATP6AP1 RARRES1 SERPINB5 GRHL1 NPM1 FASN RPN2 IVL CAPNS2	0.999999	114	CFD FTH1 FAU CST3 RPS14 NACA RPL11 RPL32 RPLP2 PVALB PTGR1 DUSP1 DPT RPL6 MYL9 RPLP1 TUBA1A RPL3 ETFB TNNT3 GSTM5 RPL36 NFKBIA RPS13 ACTB FA2H PMP22 RPS15 SCP2 NDUFB10 CAV1 KLF4 SGK1 RPL27 GPX3 RPL26 CALM2 CAT ALAD UQCRB ALDH6A1 ARL3 EEF1A1 PEBP1 THBD DSTN PSMB6 FOS NDUFB7 ALDH3A1 FXYD3 EPHX1 TXNIP EIF3K PSMC3 AOC3 TNXB DYNLRB1 EEF1B2 RAI2 OAT NDUFB3 ETFA DBI CDO1 FAM120AOS CARNS1 PGRMC1 MARC2 CN…	2.44249e-15
drug:P5550:inhibitor-dn	16984	283	218	35	APOE BHLHE40 TUBA1A CNP TUBA1B DDN SYNPR MORF4L2 YWHAZ FOXG1 PTGES3 RPL22L1 PLS3 NUAK1 ATP6AP2 PFDN2 TMEM132A ATP6V1A DUSP14 CHST1 PKP4 MOBP MAL2 EGR4 TMEM88B HEXB DHX15 ZBTB11 FAM81A ARFGAP1 VEZT PLA2G7 HNRNPU PSMD14 CLSTN3	0.999999	114	EGR1 PTGDS GLUL RPL3 GPM6A FTH1 PLP1 NR4A1 EEF1A1 SLC17A7 CALM1 FOS QDPR CCK ATP6V0C HPCAL4 TUBA1A LY6H NDRG2 CLU NPTN DNER CADM4 ARC RPRM EEF1A2 GABARAPL1 PGRMC1 RAB3A RPS27A RPL34 APLP1 RPS15 CFL1 ITM2C AP2M1 ALAD NBEA GNB1 EID1 DNAJB5 TMEM59L PRDX2 CSRP1 MAL ZCCHC12 SNAP25 CD81 UCHL1 DBI ACTB TPPP NR2F1 PFN1 NPTX1 OLFM1 KCNB1 CAP1 CNBP DUSP1 GJA1 ARL3 KLF10 RPL6 RPS29 ID4 NCALD CALM2 SCG3 ME3 …	2.44249e-15
drug:P768:psychotropic drug-dn	16984	298	239	30	TUBA1B SLC1A3 PFDN2 APOE OPALIN DDN BTBD1 PSAT1 TFRC SPTBN2 CRYM FBXO41 CNP CD47 NREP PDAP1 MIF CARHSP1 RNFT2 IDO1 GM2A PPP3CA CDK5R1 PSMA7 RASGEF1A INTS1 CLSTN1 PRPF19 BCL11B PPP1R1B	1	122	DBP CPE RPLP1 HPCA RGS4 CST3 RPL18A PDE1B RASD2 COX6A1 UBB TSPAN7 KLF9 RASL11B ITPR1 ARHGEF4 PRKCB RPS9 UQCRH COX7A2L COX14 FTH1 CSRP1 RPL27 FAM107A WFS1 NDRG2 BRK1 ATP6V1E1 UQCRC2 ATP1A2 GPR37L1 TUBB4A NDUFA10 CIRBP PTTG1IP PPP1R1A FKBP8 CRIP2 SMPD3 CMTM5 TRNP1 SRSF5 FIS1 COX5A GSTM5 ATP1B2 C2CD2L VEGFB MPND RAMP1 ARPC2 TCEAL5 EEF1A1 LDB1 RHOB WSB2 GABARAPL1 RABAC1 MRPL23 NUDT16L1 NDUFA11 ITPKA …	2.66454e-15
drug:P2365:ethanol-dn	16984	268	234	40	CP PDIA3 PPA1 GJB2 SFXN1 GSPT1 IGFBP7 GLS2 HSPD1 EBPL TRAM1 PSME4 SQLE GM2A GLDC RCL1 PTPRE DPAGT1 COPB2 PSMB2 PDP2 TMEM38B ITGB5 GNS COPA TTC39C CHUK ELAVL1 FPGS CLDN12 ZDHHC9 FAS VAMP7 TTC13 CALU CCT8 GTF2F2 MTDH CMTM6 PTBP1	0.999998	120	GSTM1 DBI ALDH2 CHCHD10 TMBIM6 ERRFI1 C8G GSTZ1 SCP2 EPHX1 STARD10 RPS27L RPL36AL BLVRB RNASE4 SLC25A5 NDUFA4 ABHD14B ETFB VKORC1 ETFA ACSS2 TMEM14C GPT SLC6A13 CCS GRHPR PTTG1IP ALAD UQCR10 GSTK1 RETSAT ALDH1L1 CHP1 EPHX2 HINT1 SLC25A15 ECHS1 GSTO1 ACADVL XBP1 SEMA4A EDF1 ME1 ADH5 IQGAP2 ENTPD5 HADHB HAGH PSME1 ALDH6A1 SUCLG2 STBD1 ZFYVE21 CCDC107 TXNDC15 SSR2 SEL1L HMGCL RPL37A SURF4 NUBP1 EEF1…	2.88658e-15
drug:P3481:ethanol|5-amino-1-(5-phospho-D-ribosyl)imidazole|dopaminium(1+)-up	16984	281	221	35	DDN THY1 CHST1 TUBA1A TUBA1B GRINA ARL6IP1 TMEM132A SLC24A3 SLC2A1 FOXG1 LAPTM4B SERPINE2 CPT1C PHACTR3 SEZ6L2 PPP1R1B CTNNB1 MOBP ZMIZ2 RNF145 C4B LRRC58 RPL7 FAT1 BCL11B SYNPR PSMD14 FASN TFB2M CACNB3 ATXN7L3 NDRG3 CIAO1 NAA38	1	115	SGK1 PTGDS PENK RAPGEF2 RPS14 RPL31 FTH1 RTN1 DBP TUBA1A STMN4 WASF1 SRSF5 COX4I1 SCN4B RABAC1 SNPH KXD1 NDUFC1 RPS27A HIGD2A B2M CD81 SYTL2 MAL LY6H DENND5A RASL11B SCG2 RPL26 BNIP3 PDE1B SERINC1 INSIG1 RPL32 GSTM5 NDRG4 TMCC2 NDUFV3 NRSN1 JPH4 RESP18 RAB33A RPL11 GHITM NEGR1 SLC22A17 ATP6V0C RBFOX3 RPL10A RPL10 PEBP1 HPCAL4 SLC30A4 WIPF3 IFI27 JUN GABRA1 HLF GDE1 CLU NBEA FAU PLIN4 ARPP21 ATL1 …	2.88658e-15
drug:P4812:ochratoxin A-dn	16984	223	183	17	APOE DAO GRINA CTSB SLC22A6 POMP IGF2R TUBA1A ASS1 PSMA7 AHCY SLC22A1 CDK4 PLAU DHFR MIF PSMB2	1	100	HBA2 HBB GPX3 MT2A FAU AKR1A1 SPINK1 PCK1 COX8A NDUFB4 MGST3 NDUFB9 TTC36 NDUFA3 RPLP2 FBP1 GSTO1 MDH1 HAAO TPT1 SOD1 NDUFA4 KHK GSTA5 GPX4 ALDOB G6PC GAMT APOM SLC22A18 CTDSP1 COX5B EPHX1 PFN1 SLC37A4 MT1A MGLL NDUFS7 ALAD NDUFC1 RPS25 GSTA1 OAZ1 MPST SLC25A3 PTGDS NDUFA6 IDH3G COX7A2L MAP2K2 LDHD COX6A1 ESPN MAP1LC3A NDUFB8 TPRG1L COX5A MARC2 RPL9 QDPR ATP6V0C RPS9 SLC25A11 AKT1 TUBA1A CORO1B A…	2.88658e-15
drug:P4822:N(6)-(1-carboxyethyl)-L-lysine|ochratoxin A-up	16984	386	333	43	APOE CTSB ASS1 GRN ACP5 ATP6AP1 IFITM3 OPLAH TUBA1C TUBA1B IGF2R DAO LOXL1 ARPC1B GNS ENO1 SERPINH1 BGN GRINA IGFBP1 SNRPB AQP2 LBH IGFBP3 CDK4 SPARC FKBP1A ANXA2 VHL YWHAG SLC22A1 PSMA7 NAA20 PRMT1 MRPL3 CELSR2 TMEM79 FASN TOMM20 PEX5 PSMC4 BMP7 S100A10	1	157	MT2A HBA2 HBB AKR1A1 ITM2B GABARAP NDUFA4 RPS9 SLC37A4 NDUFB4 CST3 SLC6A8 PFN1 ALDOB DBI G6PC SLC25A4 CD81 EEF2 CRTAP TMBIM6 RPS13 DNASE1 MGST3 PCK1 PEBP1 SLC22A18 RPL18 RPL11 ATP6V0C RPL13A CKB MRFAP1 CAPNS1 AUH FABP3 COX5B AMN TCN2 SUCLG1 RPS27L NDUFV2 RPL6 GABARAPL2 MYL9 SLC25A3 OAZ1 ALDH2 RPS27A TSC22D1 CSRP1 MPST CLU PTGDS GOT1 DDC VPS29 TXNIP RABAC1 RPL31 RPLP2 RPS15A RPL10 RPS8 SLC22A5 NDU…	2.9976e-15
drug:P821:-up	16984	347	263	33	FASN HAMP PAH AHSG GLS2 SERPINA6 IFITM3 PYGL APOA2 SDS FADS2 SREBF1 AMACR ELOVL2 ITIH2 MAT1A SEC61G NNMT RPL22L1 PHLDA1 KNG1 SLC38A4 HAL DHCR7 BST2 ASGR1 CRP C3 SQLE IGF1 PGK1 HES6 ACACA	1	131	INMT GOT1 ALDOB ACSL5 SELENBP1 HPD AADAC KXD1 FGA ME1 KHK FBP1 COX6A1 ACTB TTC36 QDPR DBI TMBIM6 FTH1 SLC2A2 HAAO SERPINC1 ANG RNF125 RPL4 UBA52 UQCRC1 NDUFA6 COX7A2 PCYT2 UGP2 SLC9A3R1 RPS8 NDUFA4 SAR1B FAU UBC TAT APOC3 OAT RPS27A NDUFS5 GLRX5 COX5A EEF1A1 GHITM METTL7B UQCR11 CISD1 ACO2 SDHB ABHD14B CIDEB SLC25A1 ELOVL6 GSTK1 NDUFC1 TM7SF2 SUCLG2 GSTM3 MARC2 GSTA4 ABCG5 RPS29 LGALS9 RPS15 HAGH…	3.10862e-15
drug:P654:zinc oxide|nanoparticle-dn	16984	365	282	48	HSPA5 HSP90B1 S100A10 APOC1 PDIA3 FMO1 HSP90AA1 APOE TRAM1 HAL APOA2 GLDC LY6E FPGS IGF1 APOF CTSC CANX HSP90AB1 MIF CYP7B1 KRT18 CAPRIN1 CLDN1 ELOVL2 ACLY PYGL EBPL LIPC SGPL1 HSPD1 STT3A MARC1 TRAP1 POMP SREBF1 SSR1 TGM2 RPN2 NUDT4 CPN1 NIT2 UBQLN1 FKBP4 LACTB2 DNAJB11 SCO2 PSMD11	1	138	A1BG BHMT2 HACL1 G6PC APOC3 ALDH1A1 EEF1A1 RNF125 HGD FABP1 FBP1 ALDH2 RPL10 SERP1 LGALS9 PLIN2 P4HB CAT RPL4 C8G PGRMC1 ACSL1 CTH ADIPOR2 METTL7B HSD17B2 ADH4 SEC14L2 CNBP RGN FGA HAAO MDH1 CROT ME1 SOD1 CYB5R3 GSTK1 NDUFA4 ACSM1 RPS6 UBA52 AGPAT2 GSTM3 ALDOB RPL10A EHHADH CHCHD2 OSGIN1 TPT1 UGT2A3 LIPA PKLR CMBL ALDH9A1 GOT1 RPL3 ABCD3 GSTM1 DDC BTG1 QDPR GCDH PPP1R3C KHK ALAD LGALSL ACSL5 FKBP…	3.55271e-15
drug:P2367:ethanol-dn	16984	211	186	29	CP PDIA3 PPA1 GJB2 SFXN1 GSPT1 GLS2 HSPD1 EBPL TRAM1 IGFBP7 PSME4 GM2A RCL1 GLDC PTPRE DPAGT1 SQLE PSMB2 TMEM38B PDP2 TTC39C COPB2 CHUK CLDN12 FPGS ITGB5 ELAVL1 GNS	0.999998	101	GSTM1 DBI ALDH2 CHCHD10 TMBIM6 ERRFI1 C8G GSTZ1 SCP2 EPHX1 STARD10 RPS27L RPL36AL BLVRB RNASE4 ABHD14B ETFB SLC25A5 VKORC1 PTTG1IP ETFA ACSS2 NDUFA4 TMEM14C GPT CCS GRHPR SLC6A13 ALAD RETSAT GSTK1 ALDH1L1 EPHX2 SLC25A15 ECHS1 GSTO1 ACADVL UQCR10 ADH5 HINT1 IQGAP2 ENTPD5 ZFYVE21 PSME1 XBP1 SUCLG2 HAGH ME1 STBD1 RPL37A HMGCL CCDC107 ALDH6A1 SEMA4A CHP1 SSR2 HADHB MSRB1 XDH SURF4 NUBP1 HBP1 GABARAP …	3.77476e-15
drug:P91:1-methyl-4-phenyl-1,2,3,6-tetrahydropyridine-dn	16984	363	331	50	ENC1 SERPINE2 DDN HOPX NUAK1 ANO3 HOMER1 PPP3CA SYNDIG1 MORF4L2 C4ORF46 OLA1 DOCK4 PLS3 SLC1A3 MAP2K1 ZNF365 R3HDM2 SUPT16H PTDSS1 LRRC8B CKAP5 MAFB VSNL1 TRIM37 HDAC2 FOXG1 NSF BLCAP EGR4 MIF PRPF19 CELSR2 ANKRD28 SHROOM2 PLK2 ZNF638 PPME1 UBE2NL CACNG3 TRIM28 KCNS1 PABPC3 TFRC BZW2 PSMD14 PGBD5 CDK2AP1 SLC6A1 TRAF5	1	156	SPARCL1 LMO3 EIF4A2 CKB TPT1 WASF1 GRIA2 GPM6A TSC22D1 RTN1 PTGDS NDUFB1 SCN1B NPTN CAMTA1 KIF5C SNAP25 RPS20 SLC17A7 NCK2 DYNLL1 TAGLN3 PRKCB MT2A OLFM1 TUBB2A PDE2A RPS25 RPL4 RPLP1 GSTO1 CCK AK5 CBX6 SATB1 FXYD7 RPL3 EGR3 FAM131A TSPYL1 VAPA CA11 ANXA6 RPL9 TSPYL4 PKIA SNAP91 RPS24 SNN CAMTA2 NELL2 PRKAR2B SLITRK5 MT1E COQ9 KIF5A FAM3C CCNI SH3GL2 ALDOC ELAVL4 YPEL5 HK1 SCG3 ATP6V1G2 LDB2 COX6…	3.77476e-15
drug:P5177:toxin-up	16984	269	232	24	TUBA1A ADD3 BIK MARCKSL1 PPA1 DSP C4ORF46 SOX9 MIF PABPC3 FAT1 EPS8 GRN BTBD1 TNNT1 PLA2G2A YWHAZ CCT3 ITGA6 ARPC1B NIT2 DSG2 MRPS35 S100A11	1	119	S100P AKR1B10 TUBA1A TFF1 ID1 AKR1C3 IFI27 ID3 FTH1 NQO1 TXNIP CD63 LGALS4 AGR2 TSPAN1 ALDH3A1 DYNLT1 PRDX5 TST GABARAP CTSE RPL13A RPL3 ARL6IP5 ALDH1A1 RPL4 ITM2B VDAC2 CHMP2A HADHB EEF2 RPL11 OST4 CYSTM1 ETFA RPL29 RPL36AL MKNK2 SCP2 RPL34 PRR15 RPS25 GABARAPL2 OAT PFDN5 CAPNS1 ARRDC4 CAP1 SRP14 RNASEK KRT20 UFC1 NCOA4 CHMP5 UBA52 RPL9 SSR4 TMEM14A CCNG1 RPS8 VAMP8 RPL36 MVP COX7A2 UBL5 CAMLG A…	3.77476e-15
drug:P781:histone|L-methionine|lysine|dimethyl sulfoxide|adenosyl group|inhibitor|biomarker-up	16984	285	240	20	MIF C4ORF46 RPL22L1 TMSB15A TUBA1A SH3KBP1 GGH TCL1B GPI ATP13A1 LRRC37A2 ADAR KTN1 LARP1 CENPW CD24 CDC25B MAGEA3 TAP1 TRIM28	1	122	GRHPR MZB1 DCAF6 CD52 SF3B5 NDUFA4 COX7C DBI NDUFA1 CFL1 GADD45A RPL32 RPL9 PFDN5 RPL34 MOB3C OST4 FAU ADTRP TUBA1A HK1 PRDX5 SGK1 NSMCE1 CHCHD10 TAF7 SLC25A6 DECR1 CHST2 UFC1 DCXR CAPNS1 NFKBIA PTPRCAP SLC25A3 RPL6 MKNK2 CD81 FAM117A RPS29 PGM1 EEF2 SEC13 PIM2 SSR4 RPL10 CHCHD2 UBA52 GMDS AP3S1 UGP2 TPT1 UQCRC1 PHYH HIGD2A RBX1 ECHS1 BTG2 EIF3G MRPS6 RPS20 SRP14 SASH3 NOP10 VPS28 GLRX LRRC37A2 C…	3.9968e-15
drug:P2370:ethanol-dn	16984	236	209	34	CP IGFBP7 GJB2 GLS2 RCL1 HSPD1 SFXN1 GSPT1 EBPL PPA1 TTC39C PDIA3 PSME4 GM2A PDP2 TRAM1 GLDC SRD5A1 CHUK PTPRE DPAGT1 GNS TMEM38B CLDN12 DDAH1 NRP1 CMTM6 FADS2 COPB2 ZDHHC9 PTBP1 ELAVL1 FPGS CARHSP1	0.999998	110	ALDH2 CHCHD10 SCP2 DBI ERRFI1 TMBIM6 C8G RNASE4 GSTZ1 STARD10 ETFA ABHD14B RPS27L ETFB SLC25A5 NDUFA4 CCS VKORC1 PTTG1IP GSTK1 XBP1 GPT RPL36AL GSTM1 EPHX1 GRHPR ALAD EPHX2 ECHS1 TMEM14C ALDH1L1 ACSS2 RETSAT SLC6A13 CHP1 BLVRB HADHB ACADVL ALDH6A1 UQCR10 GSTO1 SLC25A15 ADH5 HAGH SUCLG2 S100A1 ACTB IQGAP2 HMGCL ZFYVE21 STBD1 MSRB1 HBP1 ECHDC2 CCDC107 HYI CSRP2 SDHB PPM1K DCXR TMEM120A ENTPD5 SLC25…	4.10783e-15
drug:P2811:hormone-dn	16984	296	235	36	MIOX ASS1 CDH16 SLC22A6 CYP7B1 NUDT19 CLDN2 SLC22A1 FMO1 SLC22A12 DAO SFXN1 DDAH1 GRB7 NOX4 NCEH1 CYP24A1 SERPINF2 PAH CYB5B SOD2 MIF LAMP2 GLDC MFSD1 PROC MACROD2 ARL6IP1 NXT2 LLGL2 HSPD1 GM2A PLSCR2 TMEM33 PLAU HOXB7	1	120	CYP4B1 ACY3 PDZK1 DNASE1 ALDOB INMT GLYAT BDH2 GUCA2B KHK G6PC NDRG1 SELENBP1 NAT8 CHPT1 FBP1 ABHD14B COX6A1 AKR1A1 CDHR5 TMBIM4 AMN OXCT1 COX8A ERRFI1 LRPAP1 TTC36 CRYL1 HINT2 MEP1A GSTZ1 GABARAPL1 TTR ACADM SLC25A5 BHMT2 NR1H4 ALDH6A1 CIDEB SOD1 HERPUD1 PRDX5 LDHD SLC12A1 SMPDL3A TCN2 GRHPR ABCD3 F13B S100A1 RPS27L SLC9A3R1 NDUFA1 ENPP2 PRSS8 GHR CCS IVD TMPRSS2 CSRP2 ISCU SULT1C2 THNSL2 SLC6A1…	4.44089e-15
drug:P5789:dimethyl sulfoxide|methapyrilene|hydrogen chloride-dn	16984	324	264	43	PAH AHCY C3 UBD FN1 CRP RBP4 ASS1 ACLY BBOX1 PLG HRG ABCB11 HSP90B1 BAAT MAT1A RCL1 F2 CYP1A2 IGF1 ADK SHMT2 TTPA LOX RPL22L1 C4BPA NIT2 PROC ITIH1 SLC38A4 SERPINE1 CPB2 FGL1 SOD2 POLG2 HMGN1 F12 DHCR7 ASGR1 DPYS PYGL MTHFD1 DAO	1	131	BHMT BHMT2 SELENBP1 SULT1B1 CYP1A1 EIF4EBP3 PHYH SULT1A1 TM4SF4 CDO1 ALDOB ACSM1 PECR SLC37A4 FGA FBP1 HPD CTH MGST3 GNMT GAMT CHPT1 ALDH3A2 DECR1 CYB5A CAT UGP2 CMBL RNASE4 TAT RARRES2 P4HB ALDH1A1 GSTA3 QDPR STARD10 ADTRP UGT2B17 MARC2 HSD17B11 HSD17B4 PIGR CYP27A1 ALDH1L1 UGT2B15 HERPUD1 ETFB ITM2B MTTP SORBS2 SLC25A4 CIDEB ZFYVE21 STAP2 TST GLRX DCAF11 GSTA4 HSD17B6 BPHL ACOX1 ECHS1 NDRG2 PTG…	4.55191e-15
drug:P3483:ethanol|5-amino-1-(5-phospho-D-ribosyl)imidazole|dopaminium(1+)-dn	16984	340	272	44	FAM81A ATP6V1A HSP90B1 HSP90AB1 TRIM32 CRYM DZANK1 SPTAN1 GJB6 HSPA5 PSMA4 TCP1 DNAJB11 LUC7L3 SEC61G PSMB2 ASAH1 TIMM17A PFDN6 GRINA PPA1 RANBP1 RAB15 BCCIP SUGT1 SLC25A14 VPS26A ATP6V1C1 PGAM5 SRP9 RASGEF1A PCNA NCBP1 PLA2G7 POMP CCP110 KDM3A CSE1L PDCD5 PDAP1 TSPAN14 NIPA1 PSMA7 BHLHE40	1	134	PTGDS EGR1 DUSP1 ARC SGK1 FOS NR4A1 RPL23A MANF SPARCL1 RPS23 RPL27A GLUL EEF1A1 NEFM DCTN3 UNC80 FBXW7 PINK1 NRN1 DYNLRB1 MAL RPL18A SRP19 NGEF GPM6A RPL10 ITM2C GPX4 NEFL PRNP NPTX1 KLF10 NACA COX6B1 PAIP2 UCHL1 RPL4 SST RPL34 YPEL3 OSTM1 AURKAIP1 SCG3 RPRM SLC25A18 SDF2 MAP7D2 FAM107A TMEM128 JTB NKIRAS1 MTCH1 NAP1L2 CAMK2G PPP2R2B DAD1 SCG5 CALM1 GSTA4 GABARAPL1 GNG3 COX7A2L CALY NAP1L5 CDIPT…	4.55191e-15
drug:P4439:oxygen atom|2-butoxyethanol-up	16984	229	174	23	HP PYGL HSPD1 AHCY APOE PAICS NUDT4 F5 APOA2 LAMP2 PNPO CREG1 AGT AQP9 HSD3B7 IFITM3 SPP1 PLBD1 KNG1 FASN HRG SDS AHSG	1	96	FTH1 CYB5A ALDH1A1 MSRB1 CAT STARD10 LGALS9 CHCHD10 UQCRB NDUFA4 SDHB COX6A1 COX7A2 COX6B1 P4HB ETFA RNASE4 ALAD PGRMC1 UQCRC1 HAGH SELENBP1 PRDX5 RPS27L ACSL5 DBI UQCR11 ETFB HEBP1 GABARAP TMEM14C AMFR ALDOB NDUFB6 SEC14L2 SAR1B GLUL COX4I1 QDPR PHYH NDUFV3 AGPAT2 ALDH9A1 NDUFA1 DSTN SCP2 FBP1 COX5A ATP6V0C OAT GOT1 VAMP8 HADHA VKORC1 SNX3 GPX4 NDUFC1 SLC25A5 PSMD8 SLC29A1 PNP ACAT1 OAF AKR1A1 G…	4.66294e-15
drug:P2373:ethanol-dn	16984	262	230	37	CP IGFBP7 GJB2 GLS2 RCL1 SFXN1 PPA1 HSPD1 PDIA3 GSPT1 EBPL TTC39C PSME4 GM2A PDP2 TRAM1 GLDC SRD5A1 GNS PTPRE COPB2 DDAH1 CHUK DPAGT1 TMEM38B CMTM6 NRP1 SQLE FADS2 CLDN12 ZDHHC9 ARL6IP1 PTBP1 FPGS MFN1 PSMB2 HERC4	1	118	ALDH2 SCP2 TMBIM6 DBI CHCHD10 ERRFI1 C8G RNASE4 GSTZ1 STARD10 ETFA ABHD14B RPS27L ETFB NDUFA4 SLC25A5 CCS GSTM1 VKORC1 XBP1 GSTK1 RPL36AL GPT PTTG1IP EPHX1 GRHPR UQCR10 ACSS2 ALAD EPHX2 ECHS1 ALDH1L1 TMEM14C CHP1 RETSAT SLC6A13 BLVRB ACADVL HADHB GSTO1 ALDH6A1 SLC25A15 ADH5 SUCLG2 HAGH S100A1 ACTB HMGCL IQGAP2 HINT1 CCDC107 STBD1 MSRB1 ZFYVE21 TXNDC15 ECHDC2 EDF1 HBP1 SDHB HYI CSRP2 DCXR EEF1D TM…	4.88498e-15
drug:P5210:dimethyl sulfoxide|inhibitor|lysobisphosphatidic acid|BMP-7-dn	16984	400	346	66	S100A11 TUBA1B CDK2AP1 IFITM3 TUBA1A ACLY F2R GPC1 FMO1 MMP14 SPARC PRC1 LOXL1 CENPA CYB5B FSCN1 SPON2 LOX OLFML2B SNRPG NUDT4 MXRA8 MYH9 SLC1A3 POMP SQLE SLC6A6 HSD17B7 PCOLCE SIX1 SRSF1 SCARF2 SNRPD1 SUDS3 ANKRD1 NAV1 YWHAZ ANXA2 BGN HOXC10 PRMT1 LUC7L3 KLHDC10 GPX8 ARPC5 COL5A1 BIRC5 CHRNA1 ARGLU1 TPBG HOXC9 HNRNPM NRAS BTBD1 ARL6IP1 TMEM65 PYGO2 ANP32E CUL7 TGM2 CDC20 PSMA4 FZD2 HMGN1 COL18A1…	0.999998	161	IGFBP5 TPM1 ANXA6 CRIP2 MYL6 TUBA1A MTCH1 PDLIM4 UQCRH RPS20 ACTA2 CSRP2 SDC2 UQCR11 NDUFA4 COX7C UBL5 MRPL33 NFIX RPL9 UQCR10 NXN RPLP1 DBI OST4 NPTN CAV1 CALM3 TBCA SNN HIGD2A COX6B1 NDUFB8 TSPO UGCG COX8A ACTB PRDX2 PARK7 VPS28 MYADM ACADM RPL27 RPL3 CTNNA1 ST5 FAU RPL37A EGR1 DYNLL1 NDUFA2 DES PPP1CA DYNLRB1 OAZ1 GABARAP NDUFA6 ALDH2 RPL36AL HNRNPL TXNDC15 EIF3F ACTN1 CD81 RPS14 RPL31 COX6A1 …	5.66214e-15
drug:P2853:hormone-dn	16984	424	327	63	APOA2 APOC1 APOE MAT1A AHSG HP ASS1 CYP1A2 C3 HSD3B7 ITIH1 ASGR1 CYB5B CYP7B1 AQP9 APOF MIF CRP IFITM3 SLC22A1 ADK SERPINA10 C4B SERPINF2 HAMP F2 PROC HAL FETUB UROC1 GLS2 DDAH1 POMP KNG1 GRB7 GLDC PPA1 IGF1 RPN2 RGS16 CP SDS AGT NNMT HSPA9 PLG ACLY F12 SLC17A2 ARL6IP1 LAMP2 ITIH2 ABCB11 SOD2 HSD17B7 FMO1 CPB2 GM2A GSPT1 RCL1 SFXN1 APOH SERPINA6	0.999996	154	APOA1 APOC3 TTR FGA ALDH2 ERRFI1 CLU GNMT G6PC TMBIM6 OAT C8G GSTZ1 INMT CHCHD10 P4HB FTH1 RARRES2 ANG SOD1 RNASE4 RPLP1 ABHD14B NDUFA4 RETSAT HAAO HERPUD1 ACSL5 ABCD3 CYP27A1 HPD RPL36AL GLYAT EPHX1 CDO1 CCS ALDOB HSD17B4 ETFB F10 KHK TTC36 GRHPR UQCR10 RPS27L COX6A1 NRN1 SLC6A13 PTTG1IP UBB SLC25A5 SELENBP1 GSTK1 FBP1 COX5B BHMT2 SULT1A1 COX8A APOM PARK7 WBP2 COX6B1 CLEC4G UQCR11 VKORC1 NDUFA6 …	6.21725e-15
drug:P4120:ethanol|6alpha-methylprednisolone-dn	16984	460	422	95	MED30 SRP9 TNFRSF11B EIF1AX SNX10 CALCA ZIC2 TOMM20 ZIC1 THEM6 SEZ6L2 RPL22L1 SLCO1A2 PLXDC1 MEST SNRPD1 PAQR4 LY6E RNF44 CPLX1 PRIM1 GABRA3 TMEM86A CCDC82 LACTB2 KCNAB2 TOMM34 MFSD12 ITGB4 SP1 KCNC3 DAO RELL2 FAM189B FAM210A PROX1 EFNB1 AMOTL2 PPA1 PSMD14 JRKL TMEM165 TCP1 MAGOH YWHAB HPRT1 OCLN CAMK2N2 GATAD1 CDK4 RANBP6 TIPRL TSPAN6 EEF1E1 VSNL1 POLE3 LGR5 FGF11 AMMECR1L ZC3H4 CHORDC1 R3HDM2 C…	0.999727	188	RAB3A VAMP2 FUT9 AP1S2 GSTA1 GNG3 COX7B SAR1B SPTSSB SST NAP1L3 BCKDK HCFC1R1 NEFM NNAT SCOC ABCG2 CHCHD5 KLF3 OLFML2A TRAPPC1 CHODL CNTFR TMEM98 LYNX1 TIMM8B MED31 DAD1 SKP1 TMEM38A REEP1 LAMTOR1 PLEKHH3 NIPAL4 COX7A2L NDUFS7 ATN1 SLC9A2 ABLIM1 MAPRE3 SUCLG1 NEFL TMEM179B NPTN GLRX5 STMN2 OAZ2 ATP6V1D PRIMA1 TMEM59L AMPH CD99L2 DBP RGMA SUSD2 PRDX6 KRCC1 NFIX PFN1 CADM3 RESP18 MPPED1 TMEM196 PNR…	6.21725e-15
drug:P3542:ethanol|5-amino-1-(5-phospho-D-ribosyl)imidazole|dopaminium(1+)-dn	16984	371	300	44	HSP90AB1 APOE PMCH SLC12A2 CTNNB1 CNP ARGLU1 GAD1 ANKRD34B NDRG3 ARL6IP1 TUBA1A AGT TUBA1B FABP7 LHFPL3 VSNL1 PKP4 STMN1 KCNJ10 CPLX1 RRP1 FAM81A PLA2G7 PODXL2 CCP110 SERPINE2 ERMN LUC7L3 ZC3H11A FGFR3 TMEM165 BPTF HSP90B1 CLSTN1 SEZ6L2 CHD4 C1QBP PNN LEPROTL1 GM2A TWF1 HEXB MTPN	1	144	ACTB PLP1 CST3 SERINC1 CSRP1 CHCHD10 GABRA1 AHCYL1 COX4I1 PLLP PFKM QDPR CADM4 UCHL1 GOT1 SRSF5 MID1IP1 ATP1A2 CKB GABARAP OSBPL1A RTN4 RNF14 HIGD2A UQCRC1 KLC1 S100B RABAC1 CNTN1 UQCRH UNC13C EEF1A2 NDUFB10 TMX4 CEND1 NDUFS7 SH3GL2 RPLP2 ISCA1 TUBB4A GPR37L1 TMEM59L MAPT ASPA COX6B1 TSPYL1 NDRG2 GNAI1 MAP1B VPS35 ITM2A RHOQ CMTM5 NNAT RPS15 RAB3A NDUFS5 COX6A1 CYGB FAU PPP1CA NDUFB7 APLP1 FXYD1 …	6.77236e-15
drug:P5755:dimethyl sulfoxide-dn	16984	340	276	38	PAH HP CRP HAMP ADK ASS1 C3 F2 ABCB11 RCL1 RBP4 KRT18 FGL1 ACLY SLC38A4 APOH SERPINA10 VMP1 NNMT MAT1A HSPA5 RDH16 IVNS1ABP IGF1 CP AGT DCAF13 CFHR1 CLDN1 C4BPA PROC TMEM123 F12 POLG2 PLG RABGGTB ASGR1 SERPINF2	1	135	SULT1A1 ALDOB CDO1 SULT1B1 BHMT2 BHMT DBI APOA4 PIGR SLC2A2 CYP27A1 FGA GPC4 SLC37A4 ERRFI1 ACSM1 MGST3 BTG1 ADTRP PECR TAT SORBS2 ATP6V0C FBP1 SLC25A4 PHYH HPD APOC3 TTR NDUFB9 SERPINC1 PDHB TM4SF4 TSPO IFI27 RARRES2 FTH1 SKP1 CMBL CDH2 COX4I1 COX8A RPS6 GSTM1 CD36 CHPT1 SEC61B ALDH1A1 PODN ETFB STRADB LGALS9 COX7B SLC25A5 GSTA1 BNIP3 HIGD1A GSTM3 NDUFB3 RNF103 NDUFA6 TMEM37 NDUFS7 UQCRH MTTP AG…	7.43849e-15
drug:P3505:ethanol|5-amino-1-(5-phospho-D-ribosyl)imidazole|dopaminium(1+)-up	16984	297	239	30	DDN C4B GJB6 PHACTR3 PPP1R1B SLC2A1 SEZ6L2 CHST1 SFXN1 TMEM132A ACTR3B LRRC58 ADAM9 RASGEF1A ICAM5 FASN RAB15 SQLE FAM102B SLC24A3 LAMP5 MOBP HSPA5 FOXG1 PGBD5 UPF3B CANX HSPA1B MCF2L LMTK2	1	121	PTGDS SGK1 B2M NBEA RASL11B CCK PLIN4 SCN4B ALDOC NDUFV3 INSIG1 RTN1 HPCA CDKN1A HPCAL4 WIPF3 FAM107A WFS1 LMO3 SCG5 GPX4 PDCD4 RAPGEF2 RHOU GSTM5 SULT1A1 CIRBP PPP1CC DNAJB9 PRICKLE2 COX4I1 OLFM1 RAB33A PINK1 GABARAPL1 NFKBIA GSTM1 ITPKA GPM6A ARL6IP5 STMN2 TMCC2 NEGR1 IFI27 ATP6V0E2 ITPR1 MANF ST3GAL5 RRAGA UQCRC1 HINT1 AMPH KCNMB4 SLC24A4 NPTX1 ADCY9 RBFOX3 PKIA SNX24 SLC4A10 DCUN1D4 PPP2R5B S…	7.77156e-15
drug:P5163:dexamethasone|lenalidomide-dn	16984	382	314	52	RNASE2 SMC1B MIF PPA1 POMP NPM1 PABPC1 PTDSS1 SNRPF CHSY1 SNRPB PSMA1 GTF3A PSMA4 RPL7 MTHFD2 EIF4EBP1 PTTG1 MCM6 SNRPG SLC36A2 PRMT1 S100A11 C4ORF46 NPM3 PPP1R14B SEC61G RNASEH2A BCAP31 PFDN2 NUP37 UBE2C CKS1B CDKN3 RRM2 NUTF2 SRM PSMD14 HMGB2 PSMG1 MCM2 SNRPE MRPL3 CDC123 HMGN1 IFI30 RPN2 PSMA7 NFE2 SNRPA LMNB1 C1QBP	1	149	HBB PLAC8 CSTA CFL1 CHCHD2 CYTL1 VAMP8 IGLL1 RPS15A HINT1 CD48 RPL6 RPL32 RPL23A RPS24 RPL13 RPS25 NUCB2 SERF2 ELANE NCOA4 CD63 S100P UQCRH UBB RPS13 HAX1 PFN1 COX6B1 SRP14 SLC25A3 HBD RAC2 PSME1 NACA SSR2 UFC1 BTG1 CCL2 NDUFB11 GABARAPL2 DYNLL1 GMFG HBA2 ARPC2 ATF4 EEF1B2 RPL3 COX6A1 NSA2 NDUFB3 NDUFB4 RPL13A TXNL1 RPL10A FAU EAF2 PSMC3 NDUFA1 NDUFAB1 PHB2 RPL29 FKBP11 NDUFV2 TSPO PSMD8 VKORC1 A…	7.77156e-15
drug:P834:cobamide-dn	16984	301	208	33	AMACR C9 HSPA1B FASN SERPINA11 IFITM3 LIPC KNG1 IGF1 ELOVL2 SERPINA10 KMO NREP FMO1 APOF DNAJA1 PHLDA1 TTC39C CRP CSRP3 CCT6A POMP ASGR1 SUCNR1 LGALS8 HHEX LAMP2 LACTB BST2 BBOX1 KPNA2 HSPA5 ACP5	0.999999	109	EPHX2 ANGPTL3 ALDH1A1 BHMT INMT PM20D1 SLC2A2 FABP2 C8G RPS29 ALAD COX7A2 EIF4A2 RPL4 RPL18A ACSL5 DSTN VNN1 SLC9A3R1 RPS15 CLU SEC14L2 GHITM ADTRP UBC CTSE UGP2 ADH4 KHK PNPLA7 IFI27 ADIPOR2 KLKB1 PLIN2 NUDT7 GLRX5 TM7SF2 PGRMC1 ABCC2 EEF1A1 FAM47E DBI HACL1 CYP46A1 ENPEP CST3 DCT OAZ1 NDUFA4 RPL6 RPS27A UBA52 ECHS1 NDUFS5 SAR1B GHR B2M KXD1 ECI1 UQCR11 CD81 NACA CIDEB ETFA LGALS9 SHMT1 HAGH F13…	8.10463e-15
drug:P4807:ochratoxin A-up	16984	320	263	34	CDH16 SPP1 TUBA1C ENO1 TUBA1B LRP2 GNS AQP2 ANXA2 DAB2 CTSB PMEPA1 PLAU DDAH1 GRN CD24 OPLAH TUBA1A IGFBP1 DAO HSP90AB1 SERPINH1 CALB1 EIF3B S100A10 IGF2R ATP6AP1 SLC22A6 HNF1B ACP5 NUDT4 ARPC1B LOXL1 HGS	1	130	GPX3 MT2A CD63 AKR1A1 DNASE1 ACY1 UQCR11 AGXT2 SLC25A3 ATP6V0C FABP3 CST3 HSD11B2 PPP1R1A COX7A2 SLC3A1 COX8A PTTG1IP RPLP2 CRYAB MT1A RPS27A ALDH1A1 NDUFB2 CKB COX4I1 TCN2 GGT1 NDUFB4 RPL10A AMN SLC25A5 ITM2B MGLL RPS14 DYNLL1 TSC22D1 SLC25A4 SOSTDC1 CSRP2 UBB RPL13A TSPO PRDX2 RPS8 SLC6A8 RPL18A RPL31 RPS11 SDHA MGST3 CRTAP RPL9 MDH1 GDE1 RPL6 AP2M1 AKR7A3 SLC44A4 MAP1LC3A NDUFA4 MYL12A RPL11 H…	8.43769e-15
drug:P5541:inhibitor|protein polypeptide chain-up	16984	344	271	47	STMN1 LAMP5 SLC39A10 VSNL1 PPP1R1B FAM81A PDP1 TUBA1A NLK TUBA1B DUSP14 GAD1 CLSTN1 PPME1 PGK1 TMEM132A HSPH1 PFDN2 ATP6AP2 DZANK1 CACNG3 DOC2A NTM FAM49B HS3ST2 ATP6V1C1 TBR1 TOMM20 PFKP GABRA3 IVNS1ABP NAE1 NUDT4 VMP1 EXPH5 POMP CCT2 CTNNB1 NDRG3 DNAJA1 DEK HOMER1 OSBPL8 LMTK2 COCH BHLHE40 R3HDM1	0.999999	133	CALM2 PENK GPM6A NGEF OSBPL1A SERINC1 RGS4 ITPR1 NDFIP1 CKB NRSN1 VTI1B EGR1 NDRG4 TUBA1A CALM1 GLUL SCG5 CCK HPCAL4 NPY CRIP2 GABRA1 PDE1B SCN4B GABARAPL1 NEGR1 VIP GNG3 RPL26 TAGLN3 CHCHD10 GDE1 GAP43 MAT2B AP2M1 CADM4 PPP1CA ATP2B2 SRSF5 NPTN CPNE5 STMN4 ATP6V1D NAP1L5 CAMK2G RPRM SLC4A10 SYTL2 IGFBP6 COX7A2 RPL4 RCAN2 BNIP3 GOT1 SLC2A13 DYNLL2 STARD10 FAU TPPP ATL1 EIF4A2 GHITM RPS14 NAP1L2 C…	8.43769e-15
drug:P3521:ethanol|5-amino-1-(5-phospho-D-ribosyl)imidazole|dopaminium(1+)-dn	16984	343	263	37	HSP90AB1 FAM81A PGM2L1 TUBA1B THY1 HOPX RAB15 CPLX1 C4B NETO1 SLC6A7 POMP DZANK1 CCT5 PPA1 PKP4 FAIM NAA38 ARL6IP1 ENC1 GPC1 LUC7L3 CRYM CNP PTPRE MAP2K1 STMN1 ANKRD34B TIMM17A CPT1C PGK1 NRP1 ZC3H11A DAP3 MOBP FAM102B SLC25A22	1	130	B2M UQCR11 MAL GRP CHCHD10 STMN2 PFKM NDUFC1 HINT1 NDUFA1 ISCU NDUFS5 DCTN3 COX6B1 LYNX1 RPLP2 NDUFV3 NDUFB11 PEBP1 NDUFB7 CST3 COX7A2 NDUFA2 SLC4A10 RABAC1 AK5 NDRG4 PRDX5 COX4I1 LY6H VPS28 NDUFA6 RPL26 GSTM5 NDUFB3 TIMM8B ATP6V0C GNAI1 ZCCHC12 NCALD NDUFS7 KCNMB4 TTR UQCRH RPL36 PLP1 MAP7D2 GPX4 SLC22A17 COX6A1 NDUFB6 RESP18 SDHB ATP6V0E2 SST CTXN2 UCHL1 GOT1 PSMB6 PIN1 CYB5A TMEM246 KCTD4 PPP1…	8.43769e-15
drug:P5302:curcumin|messenger RNA-up	16984	301	271	45	VSNL1 TUBA1A PRKCG KCNK4 YWHAG MIF STMN1 ADCY1 THY1 GPI DNM1 DDN PGM2L1 R3HDM1 SCD SNRPD1 SEZ6L2 BCAT1 NCEH1 GIT1 MAL2 CSNK2A1 TUBA1B TMEM132A SCN2A SPRN FAM81A NRCAM KIFC2 AGAP2 ASAP1 LY6E MTPN GRIN1 YWHAB DOC2A SPTBN2 C4B NSF SRCIN1 CACNA1E ATP6AP2 SRSF2 SEC61A2 DCAF7	1	133	SYP SLC17A7 UBB CAMK2A TUBA1A ATP6V0C CALM1 RTN1 CCK DYNLL2 SNCB UQCR11 UCHL1 COX8A OLFM1 SNAP25 COX4I1 CCDC107 CALM2 TAGLN3 RAB3A CALM3 SOD1 HPCAL4 VAMP2 WFS1 CYFIP2 ATP2B4 OPCML EEF1A2 SMAP2 NECAB1 NDUFB2 ITM2C NCALD NPTX1 SNCA KIF5C COX5A WBP2 RAB6B CLIP3 COX6A1 NRXN1 FAIM2 NPTXR PRKCB NEGR1 MAP1B NDFIP1 SATB1 CST3 GRIA3 CEND1 SLC8A2 REEP5 WASF1 NR4A2 DAB1 LYNX1 GABRA1 CKB ACTB MPPED1 CFL1 INA…	8.43769e-15
drug:P659:zinc oxide|nanoparticle-dn	16984	374	298	56	APOE HSP90B1 HSPA5 HSPA9 PDIA3 FASN HSPD1 APOC1 S100A10 HAL ELOVL2 ABCB11 LIPC STT3A CANX HSP90AB1 FADS2 ASGR1 APOH HAMP HNRNPK HSP90AA1 FPGS CLTC CAPRIN1 SSR1 POMP PYGL TRAM1 TRAP1 COPA SREBF1 NIT2 CALU PAH ACLY ITIH2 GANAB HNRNPA3 TCP1 GSPT1 SLC25A13 LGALS8 FMO1 COPB2 SPARC ARL6IP1 RPL7 MYO1B SERBP1 PSMD2 CCT8 PGK1 POMT2 GLDC RPN2	0.999996	143	EEF1A1 BHMT2 INSIG1 FABP1 HACL1 LIFR TTR ACSL1 A1BG ALAD CAT RPL10 ALDH2 LGALS9 HAAO ACSL5 QDPR CROT ALDH6A1 TMBIM6 MDH1 RPL4 ETFDH P4HB ACADM ACSM1 SOD1 ACAT1 SDHA GHR ME1 GCDH RPL9 RGN G6PC PLIN2 UGT2A3 NRN1 MAOB SEC14L2 INMT ETFA ADIPOR2 HSD17B6 HADH HPD HSD17B2 PARK7 HAGH CMBL SCP2 PECR ABCD3 PAPSS2 RPL10A PKLR EHHADH TSPAN12 HGD SUCLG2 AGPAT2 RPL11 ID2 EIF4A2 ACO1 RNF125 LIPA ALDH1L1 CYB5R3 …	8.65974e-15
drug:P4269:water|6alpha-methylprednisolone-dn	16984	502	446	91	ASPN ALOX15 GPC3 LUM SLC19A3 CLDN1 CALCRL TMEM119 ITGBL1 GJB6 IGF1 FMO1 DAO ANP32E PCOLCE SLC13A4 TASP1 RTKN2 AZIN1 SLC15A2 COL12A1 SLC22A6 PFDN2 NMUR2 MRPL50 HSD17B7 PIGA GPX8 CALCA LOXL1 CDC25B GTF2E1 C1QTNF5 ZIC2 MRPS17 CLNS1A ACTL6A NTM C1GALT1C1 SQLE ANXA1 PLA2G15 TTPA FKBP9 ITGB4 CSPP1 GXYLT1 ORC5 ADORA2B GLB1L FNDC1 SFT2D2 RBM8A CCDC43 MOB1A GLA TGFBI CRCP MXRA8 ITGB8 PLSCR2 DHX35 PIGM SLC…	0.999998	196	ALAS2 SLC9A2 CPXM2 SLC26A7 PI16 SULT1A1 DPP4 MFAP4 MFAP5 MYOC DUSP1 HBB KCNJ13 TSC22D3 AHSP DCN DDR2 ZBTB16 IFI27 SHISA3 IGFBP5 SLC16A10 PKHD1L1 ACADM DHRS1 CPQ ITM2A FCGRT DDC PMP2 PDE1A ABHD14B RNASE4 PXMP2 NUPR1 PPP1R1A SMOC2 MPZ HEMGN HADHB PNLIP SLC6A13 RLBP1 ALDH3A1 OAT IGFBP6 PAMR1 PTGDS FCRL2 PDE5A KBTBD3 SDC2 SELENBP1 OLFML3 COLEC12 RABAC1 PLCD4 TST DPT KLF2 AS3MT S100A1 CCNDBP1 MRPS14 C…	8.77076e-15
drug:P5812:heme|water|protein polypeptide chain|lipid|antioxidant|reactive oxygen species|2-thiobarbituric acid|phenobarbital-up	16984	306	229	35	AHCY ENO1 ERMP1 S100A10 SLC2A1 PGK1 SPRR1A PGM2 HSP90AA1 CLDN4 SGPL1 MAL2 HSPD1 TWF1 ILDR1 ARL6IP1 ARPC1B SLC5A3 TUBA1B NCEH1 HSPA9 GMFB NEURL3 SPTLC2 CCNA2 FAM83B HSPH1 STRBP HSPA5 CCNB1 MKI67 ECT2 RALGAPA2 LAMB3 GANAB	1	117	ALDH1A1 FABP2 ACOX1 SLC25A20 ABCD3 HADHA HADHB EMP1 CAT VNN1 PDK4 HSD17B11 FAM162A CBR1 EHHADH ENTPD5 CYP4B1 MGST3 LGALS3 ABHD6 ACO2 ACADL ZG16 CHCHD2 ME1 HSD17B4 NDUFA4 NDRG1 ETFDH SPPL2A MGST2 METTL7B PLIN2 GUCA2A LPCAT3 CROT ACOT2 MAT2A HSD17B2 COX6B1 MGLL SOD1 RETSAT ETFB COX5B CHP1 AGR2 TMBIM6 HSDL2 AGPAT2 GSTO1 NDUFA10 MDH1 SPTSSB UQCRC1 FKBP5 FCGRT FABP1 KRT20 ALDH9A1 GHITM SDHA ELOVL6 TXN…	9.32587e-15
drug:P4931:trichostatin A|inhibitor|histone deacetylase inhibitor-up	16984	316	282	52	SERPINB2 TM4SF1 CCL20 MMP10 ANXA1 LMCD1 HILPDA HSPA1B GNS XIRP1 VASN HSP90B1 SBSN SLC12A8 TIMP1 STRAP DPM1 ILF2 SNRPG ATP6V1A STK4 HSPA5 VCAM1 STAT1 PPA1 DNAJB11 MAPRE1 CTSB EIF4A3 CCT8 PTPN1 IGF2R IFI6 TPR SLFN11 SF3B4 ATP6AP2 PEX5 CD55 PRG4 ISG15 CYB5B PTTG1 TUBB3 SPARC TUFT1 API5 TXNDC12 HES4 GTF2F2 GNL2 PRPF4	0.999996	137	OAZ1 FLNC NFKBIA ACTA2 NDUFB3 GLRX5 SLIRP MT1X FOS NDRG1 CSRP1 RPS5 CRISPLD2 HSPB6 PALLD DAD1 MDH1 CRYAB ZFP36 ACTB NOSIP PJA2 CALM2 DES NDUFA2 PPP1R3C HSPA2 EEF2 CKB EGR1 CD81 DCN MGST3 NUCB1 RPL3 ATP6V1D PLAT CALM1 CRADD RPL27 MYL9 DUSP5 IGFBP6 WBP2 UQCRHL KLF2 EMP1 RPS24 RPS25 UQCRQ RPL31 MYH11 TIMP3 COX6A1 RPL11 RRAGA RHOA CST3 CALD1 COX7A2 LIPA RPL35A GADD45B DUSP1 ALKBH5 CALM3 EIF1B TXNIP N…	9.32587e-15
drug:P3339:-up	16984	378	320	45	TGFBI BGN SERPINE2 IFITM3 TIMP1 PCOLCE GPNMB FSCN1 ENO1 TUBA1B ALDH1A3 SEC61G FXYD5 F2R TNS3 ANXA1 CDK2AP1 DPYSL2 TRIP6 SPARC HEXB IGFBP3 FABP7 ATP6AP1 HSP90B1 GNS TRAM1 ATP6AP2 COL22A1 LAMB1 COL8A1 BZW2 TM4SF1 NREP ZMAT3 GANAB HMGN1 HOXB7 S100A10 ITIH6 DPY19L1 RHBDF1 CENPN MYOF RFTN1	1	151	RPS25 UBB RPLP2 RPS11 RPL11 RPL27A RPL18A RPS8 CCL2 MT2A RPS20 RPS14 CIRBP RPL13A RPL35A RPL18 TPT1 RPL26 RPL31 CYTL1 EEF1A1 CHCHD2 TOMM7 RPL27 RPS13 MT1A EEF2 RPS27A CD81 RPL4 GNG11 RPS29 FAU CSRP2 RPS3A ACTB B2M NPTX2 CDH2 MYL6 SFRP1 RPS5 SSR4 RPL10A P4HB CALM2 OLFML2A OAZ1 SRPX RPLP1 PRSS23 HINT1 EIF3F KLF9 PFN1 ITM2C RPL3 RPS9 TMEM59 COX4I1 SLC25A6 NDUFA4 COX7C TMBIM4 CTNNA1 MRPS6 RPS6 GSTK1 …	9.32587e-15
drug:P2049:17beta-estradiol|estrogen|17beta-hydroxy-5alpha-androstan-3-one|17beta-estradiol|testosterone|hormone|atomic nucleus|inhibitor|antagonist|androgen-dn	16984	480	415	71	HSPA5 SCD PERP UBAP2 PDIA3 MLEC TRAM1 IFIH1 CDK19 DNAJA1 S100A10 NT5DC2 CYP7B1 HSP90B1 RCN2 SPARC SRM ALG3 RAD54L2 CD55 SEC61G ILDR1 TMEM185A CKS1B NETO2 CREG1 ATP2A2 CLTC CANX ISYNA1 AGPAT5 CDK2AP1 PSMB2 MAL2 TUBA1C RPN2 FUT4 RDH16 SLC35A2 ATP6V1A DNAJB11 WFDC5 IGFBP7 LAMP2 SRSF2 HOPX LSM12 SLC12A2 DPAGT1 HOOK1 PDIA4 ATP6AP1 SSR1 MID1 IQCB1 PSMA1 MORC4 TMEM123 SLC25A30 CCND1 ADAM9 M6PR RAD23B SL…	1	185	HBA2 SCGB1D2 DAD1 SPCS1 B3GNT5 MAT2A INSIG1 SAR1B SSR4 RPS29 OST4 SERP1 ADI1 NUPR1 P4HB SEC11C LMAN2 JMJD8 NUCB2 TMEM50B PAPSS2 SURF4 GLRX COX6A1 ACTA2 COX8A TIMM8B FKBP5 NDUFB6 TMBIM6 CSRP1 LSS UBA52 COX7A2 MAL IFT20 FTH1 PGRMC1 DCN ATP6V0D1 MSMO1 ISG20 CRELD2 DSTN MRPL54 COX7B MME SEC61B DNAJB9 UBE2D2 HSPB6 CALM1 SLC31A1 TMEM185A SLC25A5 SLC35B1 SYVN1 NDUFA4 KRTCAP2 GABARAP PIGR NDUFS4 OSTM1 ER…	9.54792e-15
drug:P4490:nitric oxide|propan-2-ol|apocynin|angiotensin|losartan|phenobarbital-dn	16984	336	274	51	TUBA1B COL1A1 COL1A2 C4B SPARC COL3A1 LUM IFITM3 THBS4 SERPINH1 COL5A2 PLA2G2A POMP APOE GRN S100A10 BGN GNS NRP1 CBFB ITGB4 NOTCH3 CTSB DAB2 HSD3B7 CTSK COL5A1 DPP3 MIF HSP90AB1 IGF1 ELN FMO1 PCOLCE KCTD13 ITPR3 YWHAB ATP6V1C1 PLCG1 LOXL1 JAG1 GRINA SMC4 CYP7B1 POLA2 SPP1 PLEC LBP ASPN DPY19L1 SNRNP70	0.999993	134	RPS29 RPL31 MYL9 UBB FTH1 DCN RPS14 SPARCL1 RPS11 AHNAK UBA52 RPS25 FABP4 ZFP36L1 NDUFB4 TPT1 RPL10A CFD UBC COL4A5 DCAF6 CPE SEC61B RPS15A XDH RPLP2 SULT1A1 RPL9 RPL27A COX8A RPS27A RPS13 HBB RPL26 RPL36 RPL15 MT1A RPL18A RPL10 HBA2 RPL18 IGFBP6 DYNLRB1 FAU NDUFB2 LGALS3 ALDH1A1 FXYD1 RPL11 SNCG CRISPLD2 LYVE1 RPL29 RPS15 GNG11 CDO1 TCN2 CD81 PFN1 GABARAP SPON1 RPL27 UQCR11 TNXB TAGLN SRPX RELN …	9.54792e-15
drug:P5307:curcumin|messenger RNA-dn	16984	292	266	43	TUBA1A STMN1 ENO1 CACNG3 MIF VSNL1 BCAT1 MTPN SCD GABRA3 SYNPR PFKP NTM KCNK4 PDP1 LAMP2 CTSB ATP6AP1 BZW1 ATP6AP2 PPP1R1B SLC2A1 NUDT4 BHLHE40 DPYSL2 DUSP14 DRD1 PAFAH1B2 PLK2 KCNV1 SSBP4 GPI DOC2A CYP11B1 CCT2 SERBP1 RAN LY6E CDK2AP1 RPL7 KPNA1 EPHX4 SMS	1	131	NRSN1 TUBA1A HBA2 CCK UBB RPLP1 COX8A ALDOC GPM6A HPCAL4 CALM1 SYT4 SNAP25 RPS29 RGS4 RNF14 DYNLRB1 DUSP1 GRIA3 UQCR11 DAD1 CDC42 PDE1B ATP6V0C GAP43 PENK CCDC107 RPL9 SNCB TMEM47 COX6A1 DYNLL2 SERPINI1 RPL10 GABRA1 SYP AP2M1 UBC MAT2A NEGR1 NPY NDUFB2 PTGDS OST4 RASD2 ATP2B4 NR4A1 AMPH TMX4 FAIM2 ITM2C RCAN2 GPM6B IFI27 DBP EGR1 ABHD8 NDRG4 MEIS2 ATXN7L3B CST3 DPP10 PITPNA RABAC1 CLDND1 TMEM196 …	9.54792e-15
drug:P3533:ethanol|5-amino-1-(5-phospho-D-ribosyl)imidazole|dopaminium(1+)-up	16984	311	237	35	HSP90B1 C4B DDN CHST1 PHACTR3 THY1 HSPA5 PPP3CA GJB6 GAD1 FOXG1 DZANK1 SLC24A3 SYNPR LRP11 SERPINE2 SPP1 RASGEF1A RPL22L1 ATP6V1C1 ANKRD34B FAM49B SRP9 CPLX1 PSMD14 VSNL1 PGM2L1 CAMK2N2 INO80 ACTR3B RAB15 PLA2G7 GRINA GRM5 NETO1	1	120	SCG2 PTGDS PENK SGK1 NAP1L5 TTR ALDOC NDRG4 B2M NEFL RESP18 RTN1 MANF LY6H CALM2 GABARAPL1 NBEA EIF4A2 RPL10 NRSN1 IFI27 CELF4 ZCCHC12 UNC80 HPCAL4 GABRA1 GAP43 FAM107A GOT1 DNAJB9 PLIN4 ZCCHC18 ELMOD1 NAP1L2 STMN2 RAPGEF2 PRNP CALM1 VSTM2A SCG5 NEFM ITM2C HINT1 MAP7D2 BNIP3 DNER CAMK2B GDA CPNE6 SDF2L1 SERINC1 RAB3A GPM6A RPS27A UBE2E1 FKBP2 GRIA2 CTXN2 PGRMC1 SLC2A13 SULT1A1 NEGR1 SYT4 CIRBP RP…	9.88098e-15
drug:P839:cobamide-dn	16984	246	151	21	C9 SERPINA11 LAMP2 SERPINA10 APOF IGF1 HSPA1B INO80 DNAJA1 AQP9 LIPC KMO ATP11C FMO1 HSD3B7 BBOX1 KNG1 KPNA2 NREP AMACR CYP7B1	0.999999	86	BHMT ANGPTL3 RPS29 PM20D1 CTSE RPLP1 EPHX2 ACADM CAT EIF4A2 CYB5A ALAD RPL31 ALDH1A1 B2M RPL34 CHCHD2 RPL10 F13B CYP7A1 NACA VNN1 ETFA KLKB1 APOA4 ABCG2 RPL32 SLC2A2 RPL3 C8G NDUFA1 UQCRB IFI27 OAZ1 COX4I1 PGRMC1 RPL13 RPS27A CLU RPL15 VKORC1 UGP2 EEF1B2 RPL27A NDUFA8 ACOX2 HSD17B4 ADTRP RPS15 ADH4 COX6B1 COX7A2 ACAT1 HEBP1 SERF2 DSTN RPS13 FAM47E BCKDHB FABP2 RPL6 NDUFB6 PNPLA7 DHRS4 RPL10A CD81…	1.0103e-14
drug:P3439:-dn	16984	441	387	71	CCL3 ACP5 CTSK APOE CXCL1 SAP25 FCGR3A ADAM8 MMP9 PLAU MIF APOC1 ANXA1 HES7 MAFB THOP1 ARHGAP4 CD163 TGFBI RNF149 CXCL5 MFSD1 NCOR2 CXCL3 HEXB C6ORF62 TFRC CCL7 NBPF15 TMX1 CCT4 CHSY1 ATP6AP1 CEMP1 SLC39A8 SLAMF8 CLTC CLEC11A EMILIN2 CCT2 NUP62 PTPN12 CBX3 PTDSS1 MARCO DAP3 GLA SPARC SRGAP2 HSPH1 ASS1 EIF3A TRAM1 PABPC1 YWHAB PTRH2 ADAP2 PLOD3 NCKAP5L FAM110A SNX8 S100A10 NKX2-8 C3AR1 OGFR BST2 R…	1	175	FOS IER2 RGS10 SGK1 CD63 ZFP36 HMOX1 DUSP1 NFKBIA JDP2 GMFG EGR1 RPS24 RPS20 HOMER3 RPL35A HEBP1 RPL11 MVP PNP RPS6 RPS29 PRNP NDUFS5 CFD METRNL SDF2L1 IL4R RPLP2 OAZ1 RGCC GPR183 RPS13 TBCA CRYL1 ATP6V0E1 RGS2 SRP14 MANF RPL37A NDUFA8 BLVRA UQCRQ COX14 GLUL EMP1 RABAC1 RPS11 CST3 RPL26 EEF2 JUND MYL12A DSTN SIDT2 FCGBP IGFLR1 COX7A2 STAT6 RPS27L RPL36AL NR1H3 IFFO1 CKB QSOX1 JUNB PLEKHO1 CD52 F1…	1.03251e-14
drug:P309:-dn	16984	300	245	41	S100A11 LGALS2 PLAGL2 UAP1L1 KLF5 SLC6A6 STT3B FKBP1A KCNU1 MSLN COL4A1 HSP90B1 LBH SLC5A6 ERMP1 SOD2 COL4A2 LLGL2 UACA TMEM65 TFRC LAMB3 PPA1 NUDT4 RNF44 CENPA IL18 LBP SFXN1 GPRC5A GM2A COX19 ARL6IP1 NCEH1 PAFAH1B3 CDH13 DAB2 RALBP1 SLC2A1 GRB7 MPHOSPH6	0.999999	123	CST3 FTH1 LGALS4 COX7C GSTA4 CYP2S1 ALDH3A2 ACSL5 PRR13 ADH7 HSPB6 RNF103 WBP2 IGSF9 SOD1 UBB SLCO2A1 EMP1 HERPUD1 RASL11A LGALS3 TMBIM4 MGST3 ALDH3A1 TMBIM6 SH3GLB2 SLC25A5 VPS28 GATA6 GSTO1 HINT1 OXCT1 NRN1 ID1 COX8A S100A1 PLAC8 CHCHD10 DBP UQCR10 ST3GAL6 GDE1 PSCA MPP1 SLC9A3R1 PNPLA2 ISCU P4HB VIL1 HIGD2A MGST2 CAPN5 MYL6 RAB11B ADIPOR2 CTNNA1 SDCBP2 NDUFA6 MOCS1 FBP2 COX6A1 GABARAP TWIST2 E…	1.03251e-14
drug:P4245:ethanol|6alpha-methylprednisolone-dn	16984	511	461	81	DAO DHCR7 TMEM86A TMPRSS5 S1PR5 RTKN2 CDC25B MIF LLGL1 CLDN1 TMEM119 PLXNA3 PIGA FGFR3 SLC6A11 PADI2 NPRL3 LFNG AARS2 CSPP1 OPLAH DGKI TYSND1 CDK5R1 APLN DOCK9 ALDH5A1 MAP6D1 KLHL17 SRGAP2 NCLN SPTB TBCCD1 TMEM161A ENOPH1 UAP1L1 ATP13A2 SRD5A1 GM2A ABHD11 ST3GAL2 COL1A2 CDK4 KIFC2 TRIB2 TMEM132A R3HDM4 RNF182 CTNNB1 SLC2A6 NUAK1 WNT7A SYNJ2 RBP4 CHPF RTKN PREP CDK5RAP1 PDXK ADORA1 MTHFD1L ELK1 PL…	1	201	ALAS2 SLC9A2 HBB MFAP4 MYOC CPXM2 PI16 HEMGN PPP1R14A NPY MVD SFRP5 DPP4 HAPLN2 SLC25A42 NEU4 NIPAL4 S100A1 UQCR11 NDUFA11 CNTFR JOSD2 MPP2 MPST RABAC1 CRISPLD2 SELENBP1 DAD1 MPZ RNF112 RETSAT HADH SULT1A1 TMED4 PMP22 PLLP PAFAH2 KCNH2 PCYT2 PLXNB3 THAP11 RASL12 NR2F6 FECH PAQR7 DUSP1 TMCC3 MRPL10 RND2 MATN4 IFI27 IVD ADAM11 AOC3 LSS EGR1 CYB5R1 MRPS14 CDK2AP2 TST NDUFS7 OAT LGI4 CDK18 GPD1 B3GAT…	1.04361e-14
drug:P3538:ethanol|5-amino-1-(5-phospho-D-ribosyl)imidazole|dopaminium(1+)-dn	16984	312	253	34	TUBA1B TUBA1A APOE FABP7 CNP CCP110 TMEM86A ERMN SERPINE2 C1QBP HOPX PKP4 LAPTM4B TMEM63A NREP FKBP9 ITGB8 CUL4B LLGL1 BCAP31 TMEM88B EPHB1 NIPA1 GAD1 PDPN KLK6 OXSR1 PGK1 ZIC1 DEK RPL22L1 STMN1 CPLX1 SQLE	1	126	CST3 QDPR PLP1 SOSTDC1 COX6A1 TUBA1A ASPA CHCHD10 DBP PCOLCE2 S100B RPL3 PLLP COX4I1 DENND5A UQCR11 CMTM5 SPARCL1 NDUFB11 PVALB FEZ1 DSTN ITM2A KCNE2 SDHB COX6B1 NDUFA1 PDLIM2 NDUFA4 GNG11 NDUFC1 COX5A NDUFS3 RPL26 UQCRB NDUFS5 VAT1L UQCRC1 SLC22A17 STMN4 GPR17 RDH5 MYRIP APPL2 MAP7D1 KXD1 GOT1 MICALL1 RPLP1 NDUFS8 NDUFB7 RPL5 NDUFB5 KCNJ13 UQCRH RAP1A CKB COQ7 RHOQ UQCR10 GLRX5 VDAC2 NDUFB6 HPCA…	1.06581e-14
drug:P4388:baclofen-up	16984	319	219	38	IGFBP1 SDS MAT1A AHCY ASS1 TTPA PAH SLC38A4 RBP4 FASN AGT NNMT ELOVL2 PAICS RCL1 MAFB SLC25A13 RPL22L1 LAMP2 LRRC58 INO80 TUBA1B PDE3B FMO1 CREG1 VMP1 CCT5 RGS16 GLS2 LACTB2 SHB RPL7 IRF2BP2 RAPH1 CFHR1 CYP26A1 HHEX HSPD1	0.999993	113	TAT GOT1 G6PC ERRFI1 GNMT HERPUD1 KLF15 ALDOB APOA4 ALAS1 AASS FMO5 CTH SULT1A1 GSTA3 CHCHD2 BNIP3 DUSP1 MFSD2A CAT FTH1 TTR CDO1 OAT RPS5 FBP1 INMT GDE1 GADD45G EEF1A1 DBI RPL23A RPS27A SAR1B ST3GAL5 COQ10B RPL32 CYP39A1 RPS27L HINT1 SLC25A15 MKNK2 KXD1 EEF1B2 QDPR USP2 FAU RPL10A ACOX2 CYB5A FABP1 RPL31 UBC PPP1R3G RPLP2 ZFP36 ALDH1L1 NRN1 RASGEF1B ME1 EPHX1 SLC37A4 RPS29 PCK1 UQCRB RPS14 APOC3…	1.08802e-14
drug:P3550:ethanol|5-amino-1-(5-phospho-D-ribosyl)imidazole|dopaminium(1+)-dn	16984	354	296	44	PMCH APOE HSP90AB1 CNP FABP7 SLC12A2 HEXB INO80 ARGLU1 TUBA1A SERPINE2 ARL6IP1 GAD1 CTNNB1 CRYM TMEM88B TUBA1B PPP1R1B KLK6 CPLX1 ERMN C1QBP SERINC5 PKP4 TULP4 SYNPR LAPTM4B BCAP31 KCNJ10 AGT HMGB3 PAQR4 ANKRD34B PGK1 NRARP BCL11B TMEM165 THY1 PPP3CA PAFAH1B3 TMEM63A TRIM59 EPHB1 YTHDF2	1	142	PLP1 CST3 QDPR ACTB PLLP GABRA1 SERINC1 S100B RPLP2 CMTM5 DBP RPLP1 CSRP1 SCN4B CKB ITM2A TUBB4A ASPA NNAT PDE1B AHCYL1 CHCHD10 UQCRB PENK SRSF5 NDRG2 NDUFA1 OSBPL1A COX4I1 GPR17 UQCRH PFKM CADM4 COX6B1 RTN4 COX6A1 HIGD2A ATP1A2 TUBA1A GNG11 GABARAP UNC13C CD81 GOT1 EID1 UQCR11 DENND5A MAP7D1 TMOD1 MID1IP1 CNTN1 CHCHD2 ATP6V0E2 RGS10 APPL2 RABAC1 NDRG1 STMN4 UQCRC1 FEZ1 SPARCL1 COX5A NDUFS5 RPS27…	1.11022e-14
drug:P3478:water|messenger RNA-up	16984	269	222	36	HSP90AA1 KRT18 TCP1 HMGN1 HSPD1 IFITM3 KPNA2 MORF4L2 SLCO1A2 CYP1A2 GLRX3 RAN CCT4 POMP CHUK DNAJA1 TUBA1B SPTAN1 HES6 BAAT ENO1 SERBP1 PAICS MIF CCT2 LGALS8 PSMB2 GNPNAT1 MRPL17 HNRNPK CCT3 AHSA1 SEC61G PABPC1 NCL FAM120A	0.999999	114	EPHX1 GSTM1 GSTA5 AKR7A3 HSD17B2 NFE2L2 SLC2A2 CTH ENPP2 NQO1 RPL15 GHITM RPS6 AKR1A1 RPL31 FAU RPS23 RPS8 MGST2 RPL18A SULT1B1 TM4SF4 RPL13A METTL7B COX7A2 SLC22A18 PEBP1 RPL11 CNBP RPL18 RPS27A RPS20 BTF3 ABCC2 OSGIN1 ACTB SKP1 EEF1B2 DDX5 DHRS7 NAGS NDUFV2 RPS13 RPL23A SELENBP1 SLC25A5 RPL6 CCNG1 RPS14 AKR7A2 RPS15 GSTM4 RPS11 RPL4 RPS15A RPL27 GK PHB2 PRDX6 STARD10 SLC25A3 UQCRH RPL29 RPS5 ND…	1.28786e-14
drug:P3508:ethanol|5-amino-1-(5-phospho-D-ribosyl)imidazole|dopaminium(1+)-dn	16984	353	283	35	CNP MOBP PPP1R1B SEZ6L2 GRINA ERMN APOE TMEM88B ARGLU1 PSAT1 GAD1 SLC12A2 PLA2G7 DCLK3 ICAM5 ECEL1 CCP110 INO80 CTNNB1 ANLN ZC3H11A FAM102B RPL7 ALDH5A1 FUS BLCAP LUC7L3 CARHSP1 C4B EIF3B TRIM28 HSP90AB1 LAMP5 IFITM3 SPTBN1	1	137	PLP1 MAL NDRG2 CKB WFS1 SRSF5 CSRP1 FTH1 CHCHD2 PENK CMTM5 B2M ATP6V0E2 CD81 ABHD4 PLLP NGEF CLIC4 PSD SCN4B RPS11 GSTM5 TSPAN2 MAP7D1 CHCHD10 PFKM PPP1CA GLUL UNC13C GNG7 RPL31 PDLIM2 PCP4L1 ASPA ISCA1 GABARAP UQCRH ADORA2A APLP1 RPS27A RABAC1 ITM2C P4HB SH3GL3 GPR37L1 MAPT RHOG TTR DENND5A SNX17 STMN4 CADM4 PPP2R5B PPP1R14A ALDH6A1 CARTPT TMCC2 FXYD1 AHCYL1 SLC22A17 GSTM1 TMBIM6 RPS8 PDE1B DCTN…	1.33227e-14
drug:P2112:erlotinib|dimethyl sulfoxide-up	16984	259	217	40	TUBA1A IFITM3 TGFBI CREG1 HIF1A CTHRC1 DPM1 NNMT TIMP1 OLR1 KRT17 SPARC ARPC1B QPCT C4ORF46 MIF LRP11 TMEM123 BZW2 TNNT1 C3 RLIM MAGEA4 HHIPL2 MFAP2 CD24 MAGEA1 MARCKSL1 PRAME ASS1 GOLPH3 TPD52L2 MAGEA3 PABPC3 IMPA1 PCOLCE NRAS MAGEA6 MAGEA12 LYPD3	0.999958	112	TUBA1A MT2A PRDX5 MT1F FTH1 RPL13A SPCS1 GABARAP RPL34 RPL32 RPS25 RPL27 RNASEK TPT1 MT1X RPS13 MT1H TM7SF2 RPL3 RPL26 NDUFB5 MT1M CFL1 RABAC1 RPL6 PCOLCE2 PRDX6 MT1E NDUFA1 PSME1 RPL11 GPX4 SLC25A3 JTB CHMP2A DECR1 SSR2 CHMP5 EEF2 EEF1A1 MLLT11 TMEM14C RPL4 MMADHC CD59 S100P AKR1C3 COX6B1 CAPNS1 RPL10 PGM1 CD63 SERINC1 RPL29 ARL6IP5 NQO1 RPL36 GABARAPL2 SSR4 OLFML2A RPL9 COX7A2 RPL31 OST4 CFD TI…	1.38778e-14
drug:P4413:-dn	16984	478	422	78	ATP2A2 RAN TNNC1 FN1 LOX COL8A1 PCOLCE BGN GPNMB TUBA1A F2R COL5A2 MMP12 COL1A1 SERPINE2 GLRX3 CALU CTHRC1 FBN1 S100A11 BICC1 MRPL42 COL5A1 ANXA1 HEXB TRIB2 MORF4L2 CNN2 TM4SF1 SPTBN1 HMGB2 PDIA3 MIF ASAH1 TNNI3 HSP90B1 COL4A2 CDK1 HMGN1 PCSK9 ARL6IP1 IGF1 ELN IQGAP1 CENPA SPTAN1 TGFB3 LOXL1 LILRB4 FKBP1A COL4A1 LACTB KPNA2 YWHAB STMN1 CHD4 TNFRSF12A PABPC1 SPRR1A FXR1 UBE2C RRM1 RPL22L1 BHLHE40 …	1	187	DCN FHL2 COX6A1 PRDX5 MDH1 NDUFA1 SERF2 EEF2 UQCRH MYH7 MYL3 EIF3F SPCS1 RPL36 RPS15 RPS29 MYL4 RPL18 COX7C FHL1 NDUFA4 NDUFA2 TUBA1A COX6B1 PRNP UQCR11 CRIP2 DYNLRB1 RPL9 RPS11 CPE COX7B HINT1 NDUFB4 COX7A2 NDUFV3 SH3BGR EMP1 NDUFB9 CASQ2 NDUFA6 RPS14 CKB FAU TIMP3 OAZ1 ACTN2 CSRP2 RPS13 COPE CCNG1 NDUFB7 NDUFV2 ACADL RPL29 PRSS23 DAD1 DAZAP2 ETFA OAT ITM2B RHOA PLN MYL6 MAP1LC3A SDHD BNIP3 NDUF…	1.38778e-14
drug:P2874:hormone-up	16984	389	305	63	APOA2 APOC1 APOE AHSG MAT1A ASS1 CYP1A2 HP HSD3B7 C3 CYP7B1 ITIH1 AQP9 ASGR1 APOF SLC22A1 CRP HAMP ADK CYB5B MIF F2 SERPINA10 SERPINF2 HAL PROC UROC1 GLS2 FETUB KNG1 PPA1 IFITM3 HSPA9 GLDC IGF1 SDS C4B CP DDAH1 NNMT PYGL AGT HSD17B7 GDF15 SOD2 F12 PLG GRB7 RGS16 ITIH2 GSPT1 ACLY LAMP2 RCL1 POMP SFXN1 CPB2 ENO1 ABCB11 APOH PSMA4 MCM10 SLC17A2	0.999896	145	APOC3 APOA1 TTR FGA GNMT OAT G6PC CLU ALDH2 C8G CHCHD10 GSTZ1 NDUFA4 ERRFI1 RETSAT ANG RARRES2 RNASE4 P4HB GLYAT HPD HAAO SLC25A5 SOD1 ABCD3 CYP27A1 COX5B ALDOB KHK CCS TMBIM6 ACSL5 RPS27L F10 FTH1 TTC36 ABHD14B ETFB SLC6A13 COX6A1 FBP1 GRHPR RPL36AL NDUFA6 HSD17B4 BHMT2 CDO1 HERPUD1 UQCRC2 UQCR11 APOM NRN1 COX6B1 COX5A GPT VKORC1 PARK7 EGR1 COX7C UQCRH EPHX1 SCP2 HEBP1 ETFA HAGH UQCR10 CLEC4G AL…	1.46549e-14
drug:P3363:-up	16984	391	338	58	IL13RA2 IGFBP3 IFITM3 SEC61G PAGE2B SPARC FSCN1 LY6E PLOD1 CALU ANXA1 PLOD3 HSP90B1 HEXB TIMP1 S100A10 SERPINE2 CTHRC1 PCOLCE DPYSL2 COL4A1 OSBPL10 STT3A SERPINH1 GNS TOMM20 BCAP31 BGN RPL7 TYMS SPP1 TMEM123 PABPC1 F2R ARPC1B PPP1R14B SLC35B2 PPT1 SNRPG MTPN PERP TRAM1 CD70 LAMP2 CLNS1A TOP2A MAGEA4 MORF4L2 VCX NFKB1 PGK1 CD44 SAAL1 MYH9 HPRT1 ACTR2 TNS3 PPA1	1	157	COX7A2 EEF2 RPL13A CHCHD2 RPL26 RPL10A OAF HAPLN1 NPTX2 COX8A P4HB SPCS1 PRSS23 EIF3F RPL27 FAU RPS14 PRDX5 RHOA HINT1 TXNDC17 VAMP5 COX7C PFDN5 RPS8 RPS9 SLC25A6 SOD1 ITM2C MT2A RPL35A TSPO TMBIM4 CIRBP EEF1A1 COX17 CD151 GPX4 JAM3 NDUFA1 SNX3 SGCE CCNI RPL3 RPS13 COX7B RPLP2 EIF3L MYL6 RPL15 CD81 SSR4 RPS27A UQCRQ CAV1 CSRP1 B2M NDRG1 GSTK1 OAZ1 EIF4A2 RPS20 MRPS6 FGFBP2 EIF4B PGRMC1 PFN1 CALM3…	1.4877e-14
drug:P762:psychotropic drug-dn	16984	302	246	46	MORF4L2 IGF2 SLC1A3 SFXN1 MIF HSP90AB1 EGR4 ARL6IP1 FKBP1A GJB6 AKAP5 HNRNPM IFITM3 AHSA1 POMP ENC1 SBK1 SERPINE2 SPTBN2 RNFT2 PPP1R9B PPME1 PFDN2 RAB15 PPP1R1B HSPA9 ZIC1 MRPL42 LRP11 BTAF1 CHORDC1 PSMC1 DUSP14 NOC2L IDO1 ATXN2 SLC24A3 SLC2A1 FARSB MRPS17 DDIT4L GPC1 DNTTIP1 FCHO1 HSP90B1 GTPBP4	0.999977	123	TTR EGR1 RPL9 SGK1 PTGDS TSPAN7 UBB RPL36AL COX5A KLF9 UBL3 UQCR11 UBL5 PRKACB RPL18A RPS11 FKBP8 MYL6 CST3 ACTB DYNLL1 CD81 RPLP1 VAT1L NDUFS3 WFS1 GAP43 IFI27 CHCHD10 CACNA2D3 RESP18 RPL34 TMBIM6 RPL26 VPS28 NDUFS8 PKD2 WIPF3 CLIC6 SNPH AAMP ISCU FTH1 HINT2 KRTCAP2 FAM107A TMX4 RXRG RBX1 XBP1 NDUFA8 COX6B1 RPL31 NDUFC1 EIF1B SLC25A5 PTTG1IP TRAPPC2L MT3 GNAZ ITPKA PDE1B ITPR1 MRPS6 AP4S1 NGEF Z…	1.52101e-14
drug:P5788:dimethyl sulfoxide|methapyrilene|hydrogen chloride-dn	16984	333	262	37	CYP1A2 AHCY HP IFI30 FGL1 CFHR1 RBP4 SNRPG PAH NIT2 PROC FUS TMEM33 SRP9 RPL22L1 GJB2 CUL4A CPB2 NIP7 HPRT1 POLR2D MAGOH C1QBP SET LYPLA1 SERPINE1 EEF1E1 APOH DAO MAL2 APOA2 TTPA CACYBP SHMT2 BST2 PFDN6 PDCD5	1	129	CYP1A1 GSTA5 BHMT NQO1 SERINC1 UGT2B17 CHCHD2 GSTM3 PHYH MYL12A APOC3 CYB5A GSTM1 SULT1B1 CDK2AP2 BHMT2 SPINK1 RPL27A PTGR1 RPS25 CAT OAZ1 COX4I1 GLRX SELENBP1 EPHX1 CMBL QDPR RPL13A SRP14 MOCS2 NDUFS5 UQCR10 PECR EIF4EBP3 NDUFA5 CDO1 HPD RPS20 RPL10 ATP6V0C MT2A ETFA NDUFB1 ATP6V0E1 GAMT CHCHD10 TMEM14C RNASE4 TTR PCYOX1 TUBB2A RARRES2 PPCS MRPL27 PGRMC1 ZFP36L1 HERPUD1 RPS27A RPL36AL C8G RPL3 A…	1.55431e-14
drug:P3550:ethanol|5-amino-1-(5-phospho-D-ribosyl)imidazole|dopaminium(1+)-up	16984	244	179	25	GJB6 C4B HSPA5 LRRC58 ANLN HSP90B1 MOBP PHACTR3 SLC24A3 TRIM32 ADAM9 RNF145 SFXN1 TCP1 PDIA4 MBOAT2 DNAJB11 IFIT3 NALCN MORF4L2 PDP1 CHORDC1 RPN2 SRP9 UBASH3B	1	97	PTGDS SGK1 FAM107A B2M SCG2 FTH1 PGRMC1 MANF PLIN4 SULT1A1 GLUL ALDOC GSTM1 GABARAPL1 UNC80 NRSN1 ZCCHC12 RESP18 HPCAL4 ALDH1A1 TTR PVALB PNCK ZCCHC18 NAP1L5 BAIAP3 RAMP3 NACA CALM1 NDUFV3 SLC35B1 IFI27 HINT1 RPL10A FOS MARC2 EPHX1 GDA RPL4 DNAJB9 MRFAP1 CDKN1A RPL10 SLC4A10 VTI1B NPTN HPCAL1 TIMP4 SCG5 TSC22D3 FRRS1L SDF2L1 RPL6 GAP43 NEGR1 EGR1 GSTA4 STMN2 EEF1A1 CDO1 TMOD2 MRPL41 NR2F1 RPS8 PR…	1.55431e-14
drug:P2345:ethanol-up	16984	234	207	33	GJB2 CP IGFBP7 GLS2 RCL1 HSPD1 SFXN1 TTC39C GSPT1 PDIA3 PPA1 PSME4 EBPL GM2A PDP2 TRAM1 GLDC PTPRE SRD5A1 CHUK DPAGT1 CLDN12 TMEM38B GNS NRP1 CMTM6 COPB2 ELAVL1 PTBP1 HERC4 ZDHHC9 CARHSP1 FADS2	0.999999	108	ALDH2 CHCHD10 SCP2 ERRFI1 DBI TMBIM6 RNASE4 C8G GSTZ1 STARD10 RPS27L ETFA ABHD14B NDUFA4 ETFB SLC25A5 CCS VKORC1 RPL36AL XBP1 PTTG1IP GSTK1 GPT EPHX1 GSTM1 GRHPR EPHX2 ALAD ECHS1 ALDH1L1 ACSS2 TMEM14C SLC6A13 BLVRB CHP1 RETSAT HADHB ALDH6A1 UQCR10 ACADVL SLC25A15 GSTO1 ADH5 HAGH S100A1 SUCLG2 IQGAP2 ACTB STBD1 ZFYVE21 MSRB1 HBP1 HMGCL ECHDC2 CCDC107 GABARAP CSRP2 HYI SDHB TMEM120A PPM1K DCXR ENTP…	1.58762e-14
drug:P3553:ethanol|5-amino-1-(5-phospho-D-ribosyl)imidazole|dopaminium(1+)-up	16984	307	233	33	PMCH C4B GJB6 MOBP PHACTR3 SLC2A1 PFDN2 SEZ6L2 DDN ADAM9 PLA2G7 PSAT1 LRRC58 ANLN HSPA5 SRP9 LAMP2 IFIT3 AGT TMX1 CANX TNK2 DNAJC7 SEC61G SFXN1 RPL7 IL18 TCP1 SLC24A3 MBOAT2 F2R CRCP GRINA	1	118	PTGDS SGK1 B2M FTH1 FAM107A MAL ALDOC PLIN4 GSTM1 GSTM5 CDKN1A SULT1A1 SRSF5 ABHD4 MANF DNAJB9 GABARAPL1 RPS14 RPL26 ALDH1A1 CYB5A PINK1 WFS1 TIMP4 IFI27 RPL10 INSIG1 RESP18 RHOU RPL11 JTB HINT1 CTXN2 EIF3F COX7A2L EPHX1 NDUFV3 TSC22D3 PDK4 DBI NFKBIA RASL11B PPP1CC P4HB NDRG2 RABAC1 GLUL GPX4 SAP30L FKBP2 TIMM8B SH3GL3 NDUFC1 RPL32 GSTA4 FAU GPLD1 ALDH6A1 RPL6 RPLP1 MARC2 RPS5 ECI2 RPS23 RPL36AL…	1.62093e-14
drug:P4477:biotin|phosphoprotein phosphatase inhibitor-up	16984	325	281	42	CALB1 HMGN1 GGH IGFBP1 ATP6V0A4 AHCY GRINA SYNE2 PLAU TMEM123 CD24 CHUK HNRNPK COL4A2 HNF1B SERBP1 SLC22A12 IVNS1ABP IGFBP3 HNRNPH1 TUBA1B TOMM20 SPTAN1 MIF RAD21 NCL HOXD9 SERPINF2 FUS SDS F2R S100A11 APOH PSMA7 SCAMP3 GNPNAT1 GNL3L HOXB6 SPP1 ACLY S100A10 PARD6B	1	136	TPT1 HBA2 GSTA5 PHYH HBB RPS3A DHRS7 RPL5 CRYAB SLC22A2 RPL13A RPL23A MRFAP1 RPL4 RPS8 RPS27A RPS15A RPS6 SULT1B1 EEF1B2 RPL9 RPS20 RPL34 FAU MT2A AGXT2 RPS14 ACO1 RPL26 STARD10 RPL27 ACSS2 RPL31 DPP4 INMT CD59 PECR RPS11 SULT1A1 TMEM59 DNASE1 GSTA4 NDFIP1 RPS9 GDE1 CDO1 RPS5 NACA MEP1B SOSTDC1 HSD11B2 CSRP2 RPS15 RPL27A IAH1 SKP1 UQCRC2 RPL18A ALDH1A1 TXNIP ACADM RPL10 HSD17B4 RPL11 NOP10 CCNI R…	1.68754e-14
drug:P354:ethanol|dexamethasone-up	16984	492	440	91	DKK1 SERPINE1 TGFBI SNAI2 MMP7 EPS8 NNMT COL1A2 OPN3 DPYSL2 NBPF10 ALOX15B LMCD1 ANXA2 AHCY ENO1 TOMM20 BCAP31 LBH TBC1D16 CCT4 GOLPH3 ARID5B PCOLCE CCT3 S100A2 FN1 RAN PPA1 RLIM EIF2S3 GPR89A PABPC3 FAIM HSPA5 LOX PRRG1 MRPL3 COL6A3 C1QBP FBL SLC20A1 ASS1 CANX LAMB1 SPARC RCL1 NREP PTGES3 ASAP1 CALU ELF1 ADAM9 HSP90AB1 ANKRD28 C3 ATIC RAD21 OR7A5 TTPAL PTBP1 TNFAIP3 PSMA1 COL4A1 POMP LUM PPP3CA …	0.999995	193	MT2A GLUL MT1E RGS2 TSC22D3 MT1X MT1H TXNIP TIPARP FKBP5 MT1F DUSP1 NEDD9 ZBTB16 UBC RHOB MAT2A ACSL1 NFKBIA NFIL3 RPL9 EEF1A1 RPS24 RPL4 ACTB PFN1 RPL27 RGCC RPL36 TMEM100 RPS25 RPS27A RPS8 AKR1C2 UGP2 RPS20 PER1 TAGLN SGK1 PTX3 PALLD PHB2 RPS15A NDRG1 RPL34 RPL13A RPS29 DCN EEF1B2 CA2 RPL3 HK1 B2M MORF4L1 UBE2E1 RPL23A DPT PMP22 PDK4 VAPA TPT1 CAPNS1 PTGDS FTH1 EEF2 EIF4H RPL11 BTG1 RPS27L MXD4…	1.75415e-14
drug:P5759:hydrogen chloride|dimethyl sulfoxide|chlorpromazine-dn	16984	327	257	47	APOC1 FETUB APOA2 PLG HRG C3 FGL1 PAH HP APOH RBP4 F2 ACLY ADK FN1 ITIH2 BST2 HSP90B1 AGT LOX MIF BBOX1 RPN2 SERPINF2 GPI SHMT2 FABP7 HSPA5 ASS1 PROC F12 C4BPA KRT18 RCL1 CPB2 LIPC ASGR1 SLC38A4 HMGN1 RDH16 IGF1 IFITM3 BAAT CFHR1 FAM120A SERPINA11 C9	0.999992	127	BHMT EIF4EBP3 SULT1A1 FGA ALDOB PHYH BHMT2 SLC37A4 SULT1B1 SERPINC1 PIGR ACSM1 C8G GSTM1 PECR TSPO IFI27 P4HB CTH APOC3 CAT CITED2 QDPR RARRES2 GNMT GAMT GPT VKORC1 DECR1 TTR CHPT1 F10 FABP1 FBP1 ANG SLC22A18 CHCHD2 RNASE4 ANGPTL3 DPT ATOX1 ERRFI1 PXMP2 SPINK1 MGST3 STARD10 SKP1 NDUFA4 MGST2 ACTB APOA4 ADTRP APOM PDHB HPD CMBL SOD1 APOA1 ECHS1 ALDH3A2 MT2A ALDH2 ACOX1 PPCS B2M HSD17B4 ALDH9A1 KHK…	1.76525e-14
drug:P3485:ethanol|5-amino-1-(5-phospho-D-ribosyl)imidazole|dopaminium(1+)-up	16984	294	215	32	THY1 CHST1 DDN C4B GRINA HSP90B1 SLC24A3 TUBA1A ARL6IP1 TMEM132A SLC2A1 SYNPR FAM81A CPT1C TNNC1 PHACTR3 IFITM3 CAMK2N2 SEZ6L2 NAA38 IFIT3 HSPA5 GRM5 CACNB3 MOBP LAPTM4B RPL7 PSMD14 NIPA1 ADAP1 ABHD11 SFXN1	1	111	PTGDS B2M SGK1 NRSN1 DBP SYTL2 GPM6A WASF1 RPS27A INSIG1 STMN4 HIGD2A ACTB HLF NEGR1 PENK IFI27 CALM1 RAB33A ITM2C NDRG4 LY6H PGRMC1 DNAJB9 CD81 MAL YPEL3 TMCC2 SNPH TUBA1A RASL11B NOP10 JPH4 ATP6V0C NUPR1 RTN1 NDUFC1 PINK1 RAPGEF2 BNIP3 RESP18 RPL34 RPL10A NAP1L5 RPL10 DCTN2 NBEA EIF4A2 GPR37L1 MANF RPS15 CIRBP GDE1 PDE1B NDUFV3 CALY ARHGDIA RPS14 RPL32 USP2 NUDT18 ATL1 VIP GNAI1 SCG2 PNCK FAU W…	1.77636e-14
drug:P2353:ethanol-up	16984	269	236	41	GJB2 CP IGFBP7 GLS2 RCL1 PPA1 HSPD1 SFXN1 PDIA3 TTC39C GSPT1 EBPL PSME4 GM2A TRAM1 PDP2 COPB2 DDAH1 GLDC PTPRE SRD5A1 GNS DPAGT1 CHUK TMEM38B CMTM6 NRP1 SQLE CLDN12 ELAVL1 HERC4 NXT2 PSMB2 PTBP1 ZDHHC9 VAMP7 FADS2 CCT8 FPGS MANBA ARL6IP1	0.999997	119	ALDH2 DBI SCP2 ERRFI1 TMBIM6 CHCHD10 RNASE4 C8G GSTZ1 STARD10 RPS27L ETFA ABHD14B NDUFA4 ETFB CCS RPL36AL VKORC1 SLC25A5 XBP1 GSTK1 GPT GSTM1 EPHX1 GRHPR PTTG1IP UQCR10 ACSS2 ALAD CHP1 EPHX2 ECHS1 ALDH1L1 SLC6A13 BLVRB TMEM14C RETSAT HADHB ALDH6A1 ACADVL GSTO1 SLC25A15 ADH5 HAGH S100A1 SUCLG2 IQGAP2 ACTB STBD1 MSRB1 CCDC107 HMGCL HBP1 GABARAP HINT1 SDHB ECHDC2 CSRP2 TXNDC15 ZFYVE21 HYI EEF1D TMEM…	1.86517e-14
drug:P2360:ethanol-up	16984	211	187	27	CP GJB2 SFXN1 HSPD1 PPA1 RCL1 GSPT1 GLS2 IGFBP7 PDIA3 GLDC EBPL PTPRE PSME4 TRAM1 DPAGT1 GM2A TMEM38B PDP2 PSMB2 PTBP1 GNS MTDH CHUK ELAVL1 COPB2 TBRG4	1	100	GSTM1 CHCHD10 ERRFI1 ALDH2 TMBIM6 GSTZ1 RNASE4 EPHX1 STARD10 SCP2 BLVRB ETFB RPS27L C8G DBI RPL36AL ABHD14B SLC25A5 ETFA VKORC1 PTTG1IP GPT RETSAT CCS NDUFA4 STBD1 GRHPR SLC6A13 SLC25A15 EPHX2 TMEM14C GSTK1 HINT1 ECHS1 GSTO1 CHP1 ACADVL ALDH1L1 XBP1 UQCR10 RPL37A ENTPD5 ALAD IQGAP2 SUCLG2 HADHB CCDC107 PSME1 ADH5 HBP1 HMGCL CSRP2 RPS9 HSPB8 BTF3 SGK1 ALDH6A1 EEF1D ACSS2 EEF1B2 TMEM120A SURF4 S100…	1.89848e-14
drug:P1873:histone|N-methyl-D-aspartic acid-up	16984	467	409	60	SLC6A1 APOE BRSK2 CDK5R1 FABP7 SLC1A3 TMEM145 CPNE7 GALNT14 RASGEF1A UNC5A CALB1 PGBD5 CRYM GRM1 ICAM5 CYP7B1 NETO1 ADRA2C GAD1 CPLX1 SRCIN1 DIO2 CLSTN3 PPP2R2C NSF HOPX APBA2 FRMD5 ABLIM2 KIFC2 HCN3 KDR SRRM3 CNNM1 MAPK8IP2 PTPRO UPP1 KCNJ10 KCNT1 TMC7 TNFRSF19 GRIN2B ADCY1 DOC2A NTM STK32C PLXDC2 SEMA4F DLL3 ASPHD1 FAM155A FJX1 ELFN1 RAB15 CREG2 WNT2 CALCA NTSR1 SLC6A7	1	182	SNAP25 ZCCHC18 SPARCL1 CELF3 KCNA1 KIF5C STMN4 UCHL1 CCK SNAP91 CELF4 NRSN1 DGKG VSTM2A B3GALT5 MMD2 S100B NRXN1 LRRC4 PRDM8 PDE4DIP RTN1 KIF5A SCG3 WSCD2 EPHA4 MGLL SERPINI1 GRIA1 SCN2B WSCD1 CHL1 CTNNA2 TPPP DUSP26 SCG5 CAMK2B AQP4 KLC1 HPCA OLFM1 DYNC1I1 RAB6B TMEM59L MAGEH1 TSPAN7 RPRM LY6H FRRS1L TMEM246 PDE1A KCNMB4 GPM6B MAP7D2 MAPT JPH4 STMN2 ABAT NEGR1 NECAB2 LMO3 TIMP4 BEX4 SLC7A8 LRRC4…	1.95399e-14
drug:P5161:dexamethasone|lenalidomide-dn	16984	394	317	55	RNASE2 TUBA1A SMC1B LMNB1 RPL7 ANXA1 PABPC3 NPM1 CDK2AP1 SLC36A2 FCGR1B IFITM3 PRMT1 TAF15 S100A11 POMP EIF4EBP1 SNRPF NPM3 FCER1G HMGB2 PSMA1 MEIS3 C4ORF46 NMI NFE2 HNRNPK TGFBI GTF3A SET IFI30 ANXA2 CLNS1A MLEC NUTF2 GATAD2A CHSY1 PTTG1 HMGN1 TRMT5 CDK4 IFITM1 PCNA SNRPA BCAP31 HSP90B1 PPP3R1 PTGES3 IFI6 RNASEH2A CTSC PYGL PTPRE SNRPE GRN	1	149	HBB CYTL1 CTSG B2M TUBA1A RPL6 RPS25 RPS15A CLC RPLP1 IGLL1 PLAC8 HINT1 RPL3 RPL9 TPT1 RPS24 RPL11 GABARAP HBD RPL23A DYNLL1 RPS6 SERF2 NCOA4 CSF2RB CFL1 NACA RPL4 HBA2 CPA3 FCER1A RPS11 EEF2 PFN1 PFDN5 RPL37A ARPC2 RPS20 COX7A2L SRP14 UFC1 RPS13 RSL24D1 REXO2 CALM2 NUCB2 GSTO1 RPL36AL RPS27L RAC2 AHSP CHCHD2 GABARAPL2 ITM2B NDUFA1 CCL2 RPL13 TAGLN2 COX7C TSPO RPL31 SSR4 CLEC10A EMP3 VAMP8 CD99 E…	2.08722e-14
drug:P4332:conjugated linoleic acid-up	16984	365	317	62	TUBA1A C3 HSP90AA1 CTSB LUM SNRPG TGFBI CTSK COL1A2 TUBB3 ITGAV COL6A3 PLA2G2A HSP90AB1 EGFL6 TUBB MXRA5 TUBA1C CREG1 FNDC1 SCD GPNMB TIMP1 PSMA7 CCT3 ECM1 STEAP1 CDK2AP1 COL5A2 RAN CD55 BLCAP FBN1 PMEPA1 MFSD1 CTHRC1 PPA1 PSMD14 PCOLCE CFHR1 SRP9 COL3A1 GOLPH3 SPARC PSMA4 YWHAB RPN2 DEK MAFB HIF1A MRPL3 C4ORF46 TUBA1B NNMT FBL SPON2 ACBD3 FKBP9 HEXB CKS1B NPM1 IFI30	0.999989	149	RPL34 TUBB2A IGFBP6 SRP14 RPL32 DYNLL1 MFAP5 AKR1C3 MYL9 RPS8 TUBA1A RPL9 RPL26 FTH1 RPL13A CSTA RPL4 PFDN5 DPT DBI EEF1B2 MRFAP1 CLEC3B ITIH5 RPL36 LEP RPL3 TUBB6 DYNLT1 NDUFA4 PPP1R1A PCOLCE2 FHL1 CHRDL1 CYB5R3 SLIRP TMEM14C MFAP4 RPL29 ADI1 OLFML3 GNG11 ARL6IP5 RPL6 NEK7 ARPC2 SEMA3G TPSB2 RNF11 CCNG1 TPT1 CRYAB COX7C ACTB JTB HERPUD1 ATF4 DAD1 F13A1 AP3S1 DCN C17ORF58 OST4 SOD1 PTTG1IP DENND5…	2.08722e-14
drug:P2037:sucrose|antidepressant|imipramine|L-proline residue|fluoxetine-up	16984	340	317	51	TUBA1A SCD SNRPD1 MAL2 THY1 LRRN1 NETO1 NSF DUSP7 TULP4 ZWINT BTBD1 NRCAM KCNK9 USP14 DNAJA1 SLC24A2 MIF SULF2 SCN2A GRINA FADS2 PRKCG C3 SPTBN1 YWHAB KCNV1 YWHAG PLXDC2 TUBA1B AGAP2 HSP90AA1 PRRC2A PSMD1 GABRA3 AGPAT5 RASGEF1A ATXN2L AGT SMARCA4 SLC26A8 SNX5 MTDH YME1L1 ARID5B HNRNPU RAD23B ITGAM PTPRJ SLC6A1 ELFN1	1	149	MT2A TUBA1A UBE2D2 FAM107A CCDC107 MT1A NDUFS4 PFN1 GLRX DSTN CAMK2G NDUFV2 SST EPHA7 WIPF3 ATP1B2 CSRP1 CLIP3 COX7A2L PPP3CB MAP1B PRDX6 GSTM1 PRKCA DBP RSPO2 B2M RPS29 CALM1 ID2 SLC17A7 CFL1 LRRTM1 GNAI1 COX7B NFIX UBE2L3 TP53INP1 CNKSR2 GNG3 RAB11B GABRA5 CELF2 GPR22 ST5 SLITRK3 UBA52 CYB5R3 CD99L2 SCG2 OPCML DENND5A PGRMC1 TRAPPC1 OST4 RRAGB WBP2 SGK1 CLU GNB1 CDO1 SCN2B BNIP3 GNAO1 CAMK2B NP…	2.08722e-14
drug:P5801:dimethyl sulfoxide-up	16984	259	218	25	RBM14 ISG15 YWHAG PPA1 SH3KBP1 SEC61G TUBA1A C1QBP KIF3A RNF149 PABPC3 RPL7L1 AEBP1 EBPL C4ORF46 BZW2 HSP90AB1 YWHAB ITPA PTDSS1 FAT1 DAP3 MAD1L1 ADD3 PMAIP1	1	112	RPL13A RPL3 ADA DCAF6 RPL34 RPL4 SLC25A6 RPL29 OST4 MLLT11 MZB1 RPL36AL GMFG BCHE RPL36 EEF1B2 NOP10 CD3D EEF2 MAL GLRX RPL32 UBA52 COX7A2L SSR4 NDUFA12 GIMAP6 SH3BGRL NDUFA3 SRP14 P2RY8 GABARAP AKR1C3 GLYR1 RPS25 PTRHD1 PSME1 TUBA1A NSA2 SERF2 SLC25A3 MRFAP1 TAF7 ARHGEF6 PFDN5 HIGD2A UBL5 ICAM3 CCR9 TERF2IP ITM2B EEF1A1 ELOVL4 HDHD2 CD52 TPT1 PARK7 SCP2 NDUFB5 RABAC1 MYL12A RPL27 LAMTOR1 EIF3G T…	2.09832e-14
drug:P2366:ethanol-dn	16984	208	185	29	CP PPA1 PDIA3 GJB2 SFXN1 GSPT1 GLS2 HSPD1 EBPL IGFBP7 TRAM1 GLDC PSME4 GM2A RCL1 PTPRE SQLE DPAGT1 PSMB2 TMEM38B PDP2 CHUK COPB2 TTC39C CLDN12 ELAVL1 FPGS ITGB5 GNS	0.999998	99	GSTM1 DBI ALDH2 CHCHD10 TMBIM6 C8G ERRFI1 GSTZ1 SCP2 EPHX1 STARD10 RPS27L RPL36AL BLVRB RNASE4 SLC25A5 ABHD14B ETFB VKORC1 ETFA PTTG1IP ACSS2 NDUFA4 TMEM14C GPT CCS GRHPR SLC6A13 ALAD RETSAT GSTK1 ALDH1L1 EPHX2 SLC25A15 GSTO1 ECHS1 ACADVL ADH5 UQCR10 IQGAP2 ENTPD5 RPL37A SEMA4A ZFYVE21 HINT1 SUCLG2 PSME1 ME1 CHP1 STBD1 HAGH CCDC107 HADHB HMGCL EDF1 ALDH6A1 MSRB1 SSR2 XBP1 SURF4 SLC25A1 NUBP1 XDH …	2.42029e-14
drug:P4792:ethanol|glucocorticoid|dexamethasone-up	16984	436	376	62	HAMP FN1 RPL7 ASS1 AGT AHCY TNK2 SLC38A4 FAM89A F2 PKDCC ATP2A2 PAH HSP90B1 C4BPA PABPC1 TMEM123 NOP16 F12 HP ADK GRN ATP6AP1 MIF STAT3 APOC1 TGM1 ENO1 SLC25A22 KNG1 PSMA1 RCL1 CYP26A1 ANXA2 PSMD2 ONECUT1 CFHR1 NUP210 IKBKB LBP ABCB11 GANAB TMEM41B TXNDC12 NUDT4 BBC3 SERPINF2 POLG2 GNE LPGAT1 CCDC58 RNASEH1 RTN4RL2 SLC25A29 TMEM38B RDH16 ACSL4 LTBR MSLN TTPA DPM1 NNMT	1	170	MT2A ERRFI1 CEBPD CRYAB ABCC2 APOA4 RPL32 ALAS1 FGA ECHS1 APOA1 ALDH3A2 SGSM3 RPS27A SULT1A1 FTH1 NDUFB3 EEF2 SLC37A4 TAT RPS14 MT1A DBI UBB PNP ORMDL2 SOD1 RPL31 RPS15A ATP6V0E1 DUSP1 PMM1 CHCHD2 BTG1 RPLP1 MST1 ABCD3 PSMD8 ITGA1 COX17 SSR4 CHCHD10 RPL36 IFI27 RPL26 RPL18A EIF4H BTG2 NDUFB9 CD81 DEPDC7 RPL13 UBA52 RBPMS NDUFA6 VAMP8 RPS3A RPLP2 PPP1CA HPD UGT2B15 MYL9 GADD45B RPS20 NDUFB4 VAMP5 …	2.53131e-14
drug:P2869:hormone-up	16984	260	203	34	MIOX ASS1 CDH16 NUDT19 SLC22A6 CLDN2 SLC22A1 SFXN1 CYP7B1 SPP1 SLC22A12 DAO HSPD1 PAH SOD2 ENO1 NUDT4 LAMP2 HSPA9 GLDC ATP6V1A NOX4 IVNS1ABP CYP24A1 MFSD1 SERPINF2 PLSCR2 MRPL50 MACROD2 SAMD9L NXT2 NCEH1 DDAH1 TMEM33	0.999995	106	PDZK1 ACY3 ALDOB GLYAT NDRG1 BDH2 CYP4B1 DNASE1 CHPT1 KHK OXCT1 GUCA2B SLC25A5 ACADM NAT8 FBP1 PRDX5 G6PC ALDH6A1 TMBIM4 MEP1A CDHR5 AMN COX7C ETFA NDUFA4 NDUFA1 COX6A1 COX5A UQCRB TNFAIP8 SMPDL3A TTR COX5B CRYL1 TTC36 GHR UQCRC2 SLC12A1 PPP1R1A TIMM8B AKR1A1 NDFIP1 CAT GSTM5 NDUFA12 CIDEB LDHD BHMT2 TCN2 LRPAP1 METTL7B RETSAT COX8A FAHD1 ABHD14B NR1H4 NDUFS3 ENPP6 SAP30 HINT1 NDUFC1 NDUFA6 CYB5A…	2.58682e-14
drug:P2804:hormone-up	16984	417	326	62	APOA2 APOC1 APOE MAT1A AHSG HP ASS1 CYP1A2 C3 HSD3B7 CYP7B1 CYB5B ITIH1 ASGR1 AQP9 APOF SLC22A1 HAMP CRP IFITM3 ADK MIF SERPINA10 F2 SERPINF2 PROC HAL C4B UROC1 GLS2 FETUB POMP DDAH1 GRB7 KNG1 ACLY GLDC SDS CP PPA1 IGF1 ARL6IP1 NNMT RPN2 HSPA9 HSD17B7 AGT GDF15 F12 PLG FMO1 LAMP2 RGS16 ITIH2 SOD2 RCL1 GSPT1 CPB2 ABCB11 APOH SLC17A2 CPN1	0.999997	152	APOC3 APOA1 TTR FGA ALDH2 GNMT ERRFI1 OAT CLU G6PC TMBIM6 INMT C8G GSTZ1 P4HB CHCHD10 SOD1 RARRES2 ANG FTH1 RNASE4 ACSL5 RPLP1 RETSAT HERPUD1 GLYAT HPD ABCD3 ABHD14B HAAO EPHX1 CDO1 CCS NDUFA4 CYP27A1 ALDOB KHK TTC36 SLC25A5 RPL36AL HSD17B4 ETFB PTTG1IP F10 COX6A1 FBP1 GRHPR SELENBP1 RPS27L SLC6A13 BHMT2 WBP2 GSTK1 NRN1 ALDH3A2 COX8A APOM GPT TST SULT1A1 EGR1 PARK7 VKORC1 CLEC4G NDUFA6 SCP2 HEBP1…	2.65343e-14
drug:P4022:retinoic acid-dn	16984	528	482	110	S100A10 TUBA1B COL1A1 SERPINE2 ANXA1 IGFBP7 TGFBI GREM1 TIMP1 DKK1 STC2 DPYSL2 TUBA1C CDK2AP1 TNFRSF11B DAB2 SERPINH1 IFITM3 CCND1 PPP1R14B TPD52L2 CTHRC1 VASN THY1 ENO1 COL5A1 MFSD10 COL4A1 MYH9 LUM ATP6AP1 GLG1 FSCN1 POLD2 PLOD1 PDGFRB PABPC1 CALU COL3A1 G3BP1 COL1A2 IGF2R EBNA1BP2 COL6A3 NAA38 TMEM200A KRT34 OXTR TAF15 SNRPG RHBDF1 TFRC SRSF1 BAMBI CCT2 POLR2A PPA1 MYOF MRPL17 BGN TXLNA DNAJB1…	0.999796	207	MYL6 OAZ1 RPS25 TPT1 MT2A RPS24 RPS29 MT1A DUSP1 CD81 RPL5 IGFBP5 RPS14 KLF2 EIF4A2 RGS4 COX4I1 EGR1 RPLP2 EMP3 RPL11 EEF1A1 FOS RPS6 DCN PRDX6 PRSS23 RABAC1 UBA52 COX8A MANF TOMM7 NDUFB8 B2M EEF2 NDUFB2 UBC PARK7 NQO1 SLIRP RPL31 VDAC2 GLRX RPS27L SERF2 ADAMTS1 ACTB GNB1 CALM2 MTCH1 CRYAB RPS5 ACTA2 UQCRQ ATP6V1E1 PPP1R15A NCOA4 SOD1 ADI1 FERMT2 RPS15A REXO2 PRNP DBI NME4 PTX3 FAU CALM3 COX7A2 G…	2.69784e-14
drug:P5:dimethyl sulfoxide|Insulin-dn	16984	516	456	90	ACLY RBP4 FASN ENO1 ASS1 COL3A1 ANXA1 FADS2 SPARC HMGA1 ARL6IP1 HSP90B1 MEST CANX S100A10 HSPA9 NAA50 COL4A1 ERV3-1 G6PD CYB5B HSP90AB1 LIMS1 MARCKSL1 YWHAG HSP90AA1 IMPAD1 KIF5B EIF5AL1 ASAH1 FAR2 DHCR7 ACTR2 ZNF117 SQLE PGK1 HK2 COL4A2 SSR1 CLTC HSPA5 ACER3 SERPINH1 APOC1 STAT3 STARD7 SCD PSMA4 TCP1 RCN1 HSPD1 GPI ITGA6 ADAM12 COL5A2 YWHAZ SPTBN1 EIF3A MARC1 PDIA3 BCAP31 HNRNPD HNRNPK SH3KBP1 L…	1	198	GPD1 ACSL1 ACSS2 ME1 LPCAT3 INSIG1 UBC FABP4 ELOVL6 ACACB CD36 MVD SLC2A5 PLIN1 PGRMC1 AKR1C2 PCK1 RETSAT RHOA FTH1 CHP1 MME AGPAT2 HADHA PNPLA2 IDI1 MSMO1 PGM1 ACADVL ACADM UBB SURF4 AOC3 ACOT2 SLC25A1 EEF2 UQCRC2 CIDEC CFD GPX4 ACO2 CYB5A PLIN4 DBI PDK1 NCOA4 AKR1C3 ITM2B TMBIM6 ACO1 CKMT2 ATP2B4 EPHX1 TXNIP MYL6 MCAM P4HB DECR1 MGST3 EIF4EBP2 ADIPOR2 RPL5 DAD1 SDHA PLIN2 SUCLA2 MDH1 SLC16A7 PC…	2.70894e-14
drug:P4420:pharmaceutical-dn	16984	311	253	41	HP APOE KNG1 ASS1 APOC1 C9 APOH AMACR ASGR1 C3 SRD5A1 AQP9 BAAT LIPC SERPINA10 IGFBP1 AHCY MAT1A GLS2 MMP14 FABP7 DNAJA1 GNE CCT6A NPM1 SDS PROC IFITM3 TTPA NUDT4 ADK SNRPB GRINA PSMA4 CTSB HNRNPK ABCB11 GM2A TOMM20 SLC6A6 ACSL4	1	125	FABP1 MT1A GSTA1 PCK1 RNASE4 FBP1 CDO1 G6PC MT2A ACADM CTH RPS9 RPS3A CRIP2 NDUFA4 RPS8 PIGR RPL9 CLU ACADL RPL36AL ALDH2 RPL4 HSD17B6 FGA B2M SULT2A1 PXMP2 HADHB OTC TAT SLC25A5 GNMT ITM2B ABHD14B KLKB1 SPINK1 DECR1 SULT1C3 METTL7B DBI RPL36 SDHA ETFA OAZ1 NDRG2 MAOB CD81 RPS23 SOD1 HSD17B2 FAU COX7B EIF4A2 ECHS1 RPS27A HPN HACL1 RPL27A ENPP2 DUSP1 RPL6 PLIN2 ZFP36L1 RPL15 HAGH PAPSS2 NDUFC1 ZFA…	2.88658e-14
drug:P784:histone|L-methionine|lysine|dimethyl sulfoxide|adenosyl group|inhibitor|biomarker-up	16984	231	188	21	TUBA1A ISG15 CDK2AP1 CPNE3 MFHAS1 MARCKSL1 NLRP4 BRI3BP PARN HHEX DPYSL2 POLB HIF1A MAP2K1 PTDSS1 VOPP1 LRRC37A2 RNF44 DCK PAN3 CD70	1	100	SLC25A6 LMO2 RPL34 DCAF6 TUBA1A NSA2 TUBB6 GABARAPL2 GSTO1 EEF2 FAM214A SERINC4 PHB2 FAM117A RPL3 P2RY8 AP3S1 VPREB3 TPT1 VNN2 POLD4 FTH1 CD99 GPR18 RPL36 CSRP1 NCF4 NSMCE1 ARPC2 PPP1CC ASB13 RPS25 SERF2 RPS23 CHCHD10 SNX3 SMAP2 GLRX PNOC IER2 P2RX5 MT2A CSF2RB RPL31 NUDT11 RPL29 SLC25A1 ALDH2 PFDN5 PAPSS1 ECI2 MME RPS24 HK1 CCDC25 PNRC1 CYFIP2 CCNG1 LRRC37A2 GYG1 ICAM3 RPS8 COX7A2L RPL9 CD180 GY…	2.9754e-14
drug:P4827:ochratoxin A-dn	16984	236	183	25	SLC22A6 CDH16 CALB1 SLC22A13 ENO1 LRP2 HSPD1 GJB2 AHCY HNF1B FMO1 SLC25A30 NUDT4 HUWE1 PREP CLTC AGT PMEPA1 SLC15A2 EIF5B HNRNPU NRP1 DIO1 METAP2 STMN1	1	98	ACY1 RPS29 SLC3A1 UBC NAT8B CRYAB HSD11B2 TTC36 UBB COX8A AKR7A3 GGT1 OAT PTTG1IP GPX3 SLC22A2 HAAO NDUFB2 GSTA5 AGXT2 MEP1A GAMT UBA52 RPL18A RPL29 FTH1 ABHD14B MEP1B SOD1 CD59 UQCR11 ACSM2A ACADM METTL7B PPP1R1A KHK SOSTDC1 RPS3A BLVRA TXN2 USE1 CASR GLUL MDH1 PRSS8 GDE1 RPL36AL NDUFS7 ANPEP SLC23A3 KLF9 ESPN TST APOM ITGA1 RPL26 SLC2A5 FUCA1 NDUFB10 CTH UBXN1 RPS15 ACADL RPL4 HPD SPINK1 ZFP36L…	3.06422e-14
drug:P3680:messenger RNA-dn	16984	277	240	41	LARS2 TUBA1A STMN1 RASGEF1A HSP90AB1 PGK1 POMP TMEM132A ICAM5 CPNE7 HSP90AA1 CPLX1 MAL2 CLSTN1 HSP90B1 CHST1 GRINA KIFC2 UNC5A CRYM CACYBP PPP2R2C ENC1 CDK5R1 RRP1 SPTBN2 CNP CAMK2N2 DDN HSPA5 AHSA1 NSF MORF4L2 RAP1GDS1 CCT5 MAPK8IP2 PPP3CA CNNM1 DUSP7 YWHAG DNM1	0.999998	120	UBB OLFM1 RPS23 COX6A1 TUBA1A HINT1 TSPAN7 CPE ATP2B2 TCEAL3 UBC TUBB2A NDRG2 GABARAPL1 RNF14 RAB3A ACO2 CELF4 RTN1 MLLT11 HPCA KLC1 CALY CPNE6 WBP2 SERPINI1 MAP7D1 UCHL1 MTCH1 SLC25A4 EEF1A1 NNAT ARL6IP5 ATP6V0E2 LYNX1 GRIA1 PENK GOT1 CKB SLC25A5 STUB1 SNPH SYP HPCAL4 NDUFB8 CLDN5 GSTM3 APLP1 OAZ1 DCTN1 ITM2C FAM131A CHCHD2 GPM6A ARHGEF4 HAP1 TMEM59L SLC22A17 NDRG4 COX17 NDUFV1 RPL3 COX5B PGRMC1…	3.17524e-14
drug:P3978:dimethyl sulfide|dimethyl sulfoxide|solvent-up	16984	352	291	50	RNASEH2A SNRPG GREM1 RAN PSMA7 TUBA1A NNMT HAT1 CDKN3 GGH C4ORF46 CBX1 UBE2C ASS1 UBE2T APOBEC3B PTTG1 PCNA CENPW LAMP3 HSP90B1 PSMD14 ACYP1 CKS1B TIMP1 DNAJB11 SEC61G NAA38 HSPA5 MPLKIP ZWINT FOPNL PFDN2 DNAJA1 PRC1 SKA2 FEN1 TMEM60 NAA20 ZNHIT3 EXOSC8 QPCT SPC25 CDK1 ITGAV CCT2 NIT2 PSMC1 BLOC1S2 DEPDC1	1	139	RPL36AL DYNLL1 NDUFA4 RPS25 C12ORF57 SRP14 DYNLT1 RPL9 RPL34 NDUFA12 TUBA1A NQO1 CHMP2A SF3B5 RPL6 RPS8 SGCE MRFAP1 TMEM14C ISCU OST4 RBX1 ECI1 COX8A UBC CSRP2 NSA2 MRPL40 NFU1 RPL31 GABARAPL2 SOD1 CYSTM1 EEF1B2 RPS20 MRPL33 NOP10 PHYH TBCA RPL10 COX7A2 AMZ2 BLVRB DCTN3 TCEAL3 NDUFB3 UBA52 UQCRQ SERINC1 ORMDL2 ATP6V1E1 PFDN5 CYBRD1 PXMP2 IK MYL9 RPL27 COX6B1 MRFAP1L1 GLRX SEC31B FTH1 TCEAL4 UXT N…	3.24185e-14
drug:P4147:water|ethanol|6alpha-methylprednisolone-up	16984	500	451	95	IL1A FJX1 OLR1 CCL3 BHLHE40 SLCO1A2 TLCD1 VEGFA DDX10 CALCRL TMEM209 CXCL1 CACYBP TMEM86A OPALIN SNRPF PROM1 RPL22L1 TSPAN6 PTPRO CCL7 ASPN TNFRSF19 AMMECR1L ANXA1 GAD1 TGFB3 ARL5B CCP110 NXPH4 MPZL1 CCND1 MED30 SLC16A6 HAT1 GGH UCHL5 PIGA IGF1 GRIN2B SNRPD1 NREP CDH7 EBF2 URI1 SRSF10 SYNPR RTKN2 SIKE1 BHLHE41 RBM28 C3AR1 EEF1E1 GGCT NAE1 NXPH1 NUDCD2 SCN2A TYW5 EXOSC9 GRM5 DHX57 HSD17B7 CALB1 MY…	0.999991	196	NR4A1 NR4A2 NR4A3 EGR1 BTG2 RETSAT CSRNP1 CCL2 DBP FCRL2 CDH10 ITM2A KLF4 IDI1 EPHX1 ATF3 NIPAL4 FGF14 SST JUN AGMO SOX6 PPP1R11 CDH20 PKIA KCNIP4 IFT20 NAAA PER3 NUDT2 NAP1L3 FUT9 BCL2 ERP44 GNG11 DAD1 NUPR1 JAKMIP2 HOXA5 ARMCX1 GAB1 RASL11B SSTR1 MED31 COQ10B KCTD4 SLC9A2 MAB21L1 RNASE4 SCN3A ZFP36L1 SHISA3 FGF13 LDB2 PGRMC2 LGI1 ATL1 HSCB CDC26 CHMP5 PAQR7 ARC FBXO8 ADI1 KCNN2 PEX7 GRIA4 SYT10…	3.30846e-14
drug:P846:-up	16984	396	294	46	PAH SDS AHCY C3 IGFBP1 HAMP SLC38A4 APOC1 HRG PLG CYP1A2 APOF GLS2 RNF149 ASS1 SERPINA6 NIT2 CFHR1 SERPINF2 LAMP2 RPL22L1 CYP17A1 NNMT RGS16 C4B SERPINA11 IFITM3 HSPD1 PAICS SEC61G KRT18 ELOVL2 SLC25A13 KNG1 SAA1 PYGL APOE F2 LACTB2 PROC COX6B2 SFXN1 ABCB11 AQP9 MARC1 COL18A1	1	140	TAT RNASE4 GOT1 COX6B1 PHYH APOA4 CAT SDHB RPL10 P4HB RGN FBP1 ERRFI1 HERPUD1 RPLP1 ACOX2 SLC37A4 CYB5A RPL3 B2M ACADM FGA QDPR PEBP1 CTH NRN1 AASS HEBP1 CTSE RPL26 RPL36AL RPL31 PNP GNMT APOM UQCRB FMO5 PIPOX ETFA SELENBP1 ST3GAL5 RPS14 SULT1A1 G6PC BCKDHB RPS5 GCDH RPS29 MARC2 CHCHD2 UQCRH RPL32 NDUFB6 UBA52 RPS27L EIF4A2 PRDX5 BNIP3 MFSD2A RPL34 RPL11 RPLP2 SRSF5 HINT1 COX5A HAAO RPS11 GLUL RP…	3.57492e-14
drug:P832:Congenital pure red cell aplasia-up	16984	340	243	39	PAH APOA2 APOC1 RBP4 INO80 RPL22L1 HP TTPA APOE IFITM3 SEC61G DIO1 SDS AHCY IGFBP1 CFHR1 NNMT SAA1 C4B C9 GLS2 PPA1 SERPINA11 KNG1 PGK1 CREG1 NIT2 SERPINA10 TUBA1B F12 KMO HAL LAMP2 CYP1A2 C3 LACTB2 NAA38 PSMA7 ELOVL3	1	121	FABP1 APOA1 TTR KXD1 CHCHD2 RPL26 APOC3 FGA RPL31 FBP1 RPS27A CYB5A PEBP1 RPLP1 SDHB RPL34 ALDOB AADAC RNASE4 RGN HPD INMT RPS14 HINT1 COX4I1 RPLP2 GNMT EEF1A1 RPS29 RPL27A RPS5 RPL13 COX6B1 NDUFB11 UBA52 RPS11 P4HB RPL23A APOA4 QDPR RPL3 COX7A2 NDUFA1 RPS27L RPL10 HEBP1 RPL4 BHMT SELENBP1 RPL36 RPS23 UQCRB NDUFA6 RPL11 PHYH SAR1B UQCR11 NRN1 SULT1A1 PGRMC1 DBI SCP2 COX6A1 GPX4 IFI27 COX5A DCT CA…	3.64153e-14
drug:P4332:conjugated linoleic acid-dn	16984	232	191	31	SH3KBP1 YWHAG COL15A1 DPYSL2 PYGL NID2 PLS3 BCAP31 MTHFD1 IFITM3 EPS8 CPNE3 HILPDA AMOTL2 YWHAZ CD93 PODXL KDR MEST VCAM1 IARS2 IGF1 NBPF10 UBA2 GPI APLNR LAMB1 SLC19A3 IFITM1 COL4A1 XPOT	0.999996	101	HBA2 DCAF6 PCK1 ACSL1 FABP4 AOC3 CIDEA TXNIP CD63 DEFB132 RPL23A SRPX PLIN1 TIMP4 MT1X COX8A FIS1 CD81 ALDH9A1 SPARCL1 CLDN5 S100A1 GLUL RPS29 MAOA GPX4 UQCRH RNASEK RPS13 CHCHD10 GPX3 CDO1 SSR4 MGLL PRDX6 HADHB CAV1 PGM1 PPP1R14A ETFA PRDX5 ID1 MT2A CSRP2 RPS11 NDUFA3 AQP7 FAU DCXR RARRES2 ID3 SUCLA2 ACADM ENPP2 EEF2 DECR1 GNAI1 ICAM2 MATN2 TRAPPC5 ECHS1 GPIHBP1 ISOC1 HBM HIGD2A RPS5 NDUFB11 IRF…	3.65263e-14
drug:P3498:ethanol|5-amino-1-(5-phospho-D-ribosyl)imidazole|dopaminium(1+)-dn	16984	331	259	49	HSP90AB1 ARGLU1 PPP3CA LUC7L3 SYNPR FAM81A PPP1R1B ZC3H11A TUBA1A HSP90B1 FABP7 BPTF SLC12A2 IDO1 ZC3H15 GRM5 CHD4 STMN1 ARL6IP1 PGM2L1 HEY1 THY1 DEK CHST1 KDM3A PRRC2B YWHAZ RASGEF1A CTNNB1 BCL11B CTCF FOXG1 CACNB3 PDAP1 MTPN THOC2 ESCO1 KBTBD2 USP1 HNRNPA2B1 EIF3A ILDR2 MCF2L DNMT3A INO80 PGBD5 SH2D5 SERPINE2 SLC35D3	0.999979	127	ID4 EGR1 PDE1B SERINC1 SCN4B CST3 NDRG4 NR4A1 C1QTNF4 DBP GRIA3 ITPR1 GPM6A LMO2 ATP2B2 ATP6V1G2 PPM1K CALM2 ITM2C DLGAP2 EEF1A2 TUBA1A RPL3 EID1 HIGD2A RGS4 PCP4L1 CHCHD2 OAZ1 OSBPL1A PRKCB FOS RPS29 ATP6V0C CACNA2D3 CCK APLP1 PRMT2 UQCRB SYT4 HLF CRIP2 TMX4 VPS35 SST ADORA2A SMARCA2 GABARAP AHCYL1 NPTN CELF4 RPLP2 MAP1B FUT9 GNAI1 SCAPER UQCRH CAB39 FAT3 SECISBP2L GHITM SCG3 ANKRD63 WASF1 NGEF …	3.68594e-14
drug:P5629:water-dn	16984	105	86	12	UBD HES7 GABRQ NOTCH3 DAPL1 PABPC1 RTN4RL2 LPGAT1 FABP6 PLSCR1 RNF114 FGF19	0.999828	57	APOA4 APOA1 FABP1 DUSP8 EPB41L3 FABP2 CREB3L3 DEFA6 GUCA2B ACADM EEF2 SLC15A1 SLC28A2 CKB SI SLC39A4 QDPR PAPSS1 NR0B2 ACADL RPS6 ALDH3A2 DPP4 ID1 CHCHD10 ESRRA ADA VIL1 AMN P4HB SLC2A5 ABCD3 AQP7 TM4SF5 KLF4 MME DGAT1 OAT PEPD BTG1 STAP2 SGK1 GUCA2A MPDU1 ECHS1 ACP2 AGPAT1 TSC22D1 TM6SF2 CCS SAR1B APOC3 CKMT1B PDZK1 MTTP BST1 ASB2	3.80806e-14
drug:P236:-dn	16984	364	308	42	GPI IGFBP3 HILPDA MIF CEACAM6 CP FGL1 C4ORF46 FBL TOMM20 TUBB PGK1 SEC61G CFHR1 BZW1 NPM1 BHLHE40 CD24 C4BPA TUBA1C SMS TUBA1A NONO PLK2 RPL22L1 YWHAZ NOB1 AHCY FAM220A RABGGTB ZNHIT3 TNNT1 DPM1 PTGES3 TRIB3 RARRES1 EBPL DPYSL2 ACBD3 CCNB1IP1 ARL6IP1 VEGFA	1	145	NDRG1 MT1X MT2A VDAC2 RPL36AL TCN1 ERRFI1 PFDN5 RPS8 UBC RPL3 RPL11 RPL36 C19ORF33 RPL13A CFD EEF1B2 RNASE4 RPL34 BLVRB MT1H FAU S100P RPS5 OST4 GABARAP EEF1A2 CD63 RPL9 COX7A2 NSA2 COX8A PPP1CC COX6B1 UBA52 SSR4 IGFBP6 BNIP3 RPS29 SSR2 TM4SF4 RPL32 C12ORF57 GLRX FHL2 PRR13 UQCRH AGR2 TBCA RPL29 DBI HSD17B11 IGBP1 CAMLG UQCRQ AP3S1 COX7A2L HERPUD1 CHCHD2 GPX4 MRPL10 UFC1 DAD1 EEF2 PSMD8 CA9 CD99 …	3.9857e-14
drug:P2813:hormone-dn	16984	213	171	19	SLC6A6 CYP7B1 ASS1 SH3YL1 DUSP7 UAP1L1 CYP24A1 LUC7L3 BCL7A CXCL1 FAM222B ADK SLC22A13 LHX1 NXT2 ACVR2B IMPAD1 MAPRE1 TFB2M	1	93	GADD45G EGR1 MYL6 RPS8 DNASE1 ZFP36 INMT TTC36 ERRFI1 COX6B1 CRYAB ACY1 ISCU NR1H4 DUSP1 NUPR1 OAZ1 EIF4EBP2 SELENBP1 GSTK1 AQP4 NFKBIA MFSD2A TOB2 ID1 RPL23A SLC25A25 SERF2 SCAMP2 NDUFV2 KCNK5 FBXW5 BLVRA GUCA2B RNF186 RPS15 SLC6A19 FOS OXCT1 APOM PARK7 RPL10 BTF3 NDUFV3 SULT1C2 RPS27L UBL5 FAU HBEGF G6PC SLC6A13 SAP30 VPS28 CDHR5 MCEE COQ9 ALDH3A2 GUK1 RPL34 CDO1 PEPD TRAPPC2L SCIN BHMT2 NDUFB8…	4.01901e-14
drug:P2810:hormone|N-benzyladenine-dn	16984	296	238	40	MIOX ASS1 CDH16 SLC22A6 CLDN2 NUDT19 CYP7B1 SLC22A1 FMO1 SLC22A12 DAO NCEH1 DDAH1 CYB5B SFXN1 GRB7 NOX4 CYP24A1 ARL6IP1 SERPINF2 PAH MFSD1 LAMP2 LLGL2 GLDC LRRC8D SOD2 PROC MACROD2 NXT2 HSPD1 PLSCR2 PLAU MTHFD1 HOXB7 HSPA9 AGPS MOGAT1 ENO1 SLC6A6	0.999999	119	CYP4B1 ACY3 PDZK1 DNASE1 ALDOB INMT GLYAT KHK GUCA2B BDH2 NDRG1 SELENBP1 G6PC NAT8 CHPT1 FBP1 ABHD14B CDHR5 AMN OXCT1 TTC36 TMBIM4 AKR1A1 LRPAP1 COX6A1 COX8A MEP1A ALDH6A1 CRYL1 GSTZ1 ACADM HINT2 BHMT2 NR1H4 PRDX5 CIDEB ABCD3 LDHD ERRFI1 GABARAPL1 SLC12A1 GRHPR HERPUD1 SOD1 TCN2 F13B IVD SMPDL3A SLC9A3R1 GHR PRSS8 ISCU TNFAIP8 TMPRSS2 HAAO SLC6A19 SULT1C2 ALDH3A2 SGK2 THNSL2 CCS DCXR SLC1A1 RETSA…	4.06342e-14
drug:P824:-up	16984	375	289	48	PAH SERPINA6 APOA2 AHSG C3 APOE AHCY RBP4 HAMP HRG FASN IFITM3 APOC1 PLG F2 ELOVL2 MAT1A IGFBP1 CYP1A2 GLS2 KNG1 RPL22L1 APOF SDS FADS2 PYGL ITIH2 SLC38A4 SEC61G AGT SREBF1 PROC COL18A1 FETUB DHCR7 ABCB11 FMO1 RGS16 ASS1 C1QBP SERPINF2 NNMT RPN2 MARC1 SFXN1 SCO2 LACTB2 HAL	1	138	FGA INMT GOT1 APOA1 HPD FBP1 ACSL5 ALDOB RPS29 TTR RNASE4 SELENBP1 EEF1A1 GNMT KXD1 TAT RPL3 APOC3 FABP1 QDPR CTH TTC36 FTH1 CLU SAR1B FAU SDHB RNF125 ALAD SLC2A2 PNP BCKDHB SERPINC1 COX4I1 ME1 RPLP2 UBA52 DBI COX5A HEBP1 CIDEB KHK NDUFV1 UQCRC1 G6PC RPL4 RPL32 ABCG5 RPL36AL GSTK1 CYP46A1 COX6B1 SLC37A4 TMEM14C SLC29A1 HAAO MSRB1 NRN1 ENPEP GSTZ1 APOM RPS23 UQCR11 PIPOX COX6A1 GLRX5 ACO2 SLC9A3R1…	4.14113e-14
drug:P5728:bleomycin A2-dn	16984	305	254	43	HSPA1B BPIFA1 TNNC1 FMO1 BCL6B TNNI3 CSRP3 TCAP NT5DC2 SLC43A3 MCF2L SCEL TIE1 NPPA MYH6 MXRA8 MAPK12 TNNT2 IGFBP3 IVNS1ABP AMOTL2 KDR TINAGL1 RAPH1 NRARP SLC36A2 ENG USPL1 ARAP3 PLAUR HSPH1 NOTCH4 CHST1 ANKRD1 GXYLT1 NOTCH3 PTTG1 RAPGEF5 KIN BAMBI SPTAN1 PSMC1 PXDN	0.999999	125	EGR1 NR4A1 ACTC1 KLF2 DUSP1 TAGLN MYL9 BPIFB1 PER1 PDK4 JUN ERRFI1 MYL6 CSRNP1 GPR155 ADAMTS1 DBP SEMA3G LYVE1 USP2 IGFBP6 MCAM FLNA ATF3 CEBPD ATF4 SERTAD1 FOS PCOLCE2 GPIHBP1 KLF6 CYP4B1 BTG2 BMP6 CDO1 NFKBIA MYOZ2 CRY2 CLDN5 KLF11 INMT FXYD1 PXDC1 PRX TSPAN7 PRICKLE2 RGCC PGM5 UNC45B RASGEF1B TNS1 ICAM2 SCUBE2 PRDX6 RECK CIRBP CXCL14 ACER2 NDRG2 RRAS ITPKB ILK ZFP36 ACE RHOB NPR2 SELENBP1 XDH …	4.17444e-14
drug:P771:psychotropic drug|imipramine-dn	16984	314	257	31	ENO1 APOE SPTBN2 PFDN2 PPP1R1B CRYM DDN SLC2A1 PDAP1 OPALIN PPP1R9B RNFT2 AKAP5 IDO1 ZMAT3 YWHAB MIF CNP CARHSP1 INTS1 TMEM158 CLSTN1 PSMA7 TUBA1A IGF2 TRIM28 ACVR2B PLK2 ACLY RNF169 EGR4	1	126	PDE1B DBP RASD2 RPLP1 SGK1 UQCRH RPS25 HPCA RPS15 WIPF3 RPL18A C2CD2L MYL6 CHCHD10 FTH1 SERP2 CKB FAM107A RPS29 SST RPL34 FKBP8 MTCH1 RPS9 NDUFA1 PPP1R1A KLF9 PENK RPL32 ATP1A2 COX6A1 NDUFA7 CPE RPL27 NDUFA11 TRNP1 RGS4 VAMP2 PTGDS NDUFA2 BRK1 NDUFA3 MT3 PRKCB LDB1 NUDT16L1 EIF1B RAMP1 COX6B1 APLP1 DIRAS1 WFS1 BAG1 SYNDIG1L PSMC3 WSB2 RABAC1 GPR37L1 RGS10 TOMM7 KRTCAP2 ATP1B2 UBA52 PCP4L1 SMARCD3…	4.70735e-14
drug:P3539:ethanol|5-amino-1-(5-phospho-D-ribosyl)imidazole|dopaminium(1+)-dn	16984	279	220	32	TUBA1A TUBA1B DDN CRYM PKP4 APOE TMEM86A THY1 ITGB8 CNP CPLX1 SEZ6L2 FABP7 HOPX HSPA5 RAB15 SLC6A7 PGBD5 AGT PGK1 LLGL1 PMCH RNF44 PHACTR3 SLC24A3 TBCD FKBP9 C1QBP PLS3 PSAT1 ICAM5 ADAMTS20	1	112	TUBA1A PTGDS COX6A1 SGK1 HPCA DENND5A S100B SOSTDC1 TMCC2 ITM2C AMPH LYNX1 TUBB4A RABAC1 CST3 RASL11B NRN1 UQCRC1 UQCR11 WASF1 CPNE6 MAL NDUFB11 SHISA4 GPR17 FXYD1 RAPGEF2 CCK CHCHD10 PRICKLE2 NPTX1 ATP6V0C GPX4 WIPF3 SIRT2 LTC4S NPY2R CMTM5 NEFL GABARAP APLP1 OLFM1 PDLIM2 ATP6V0E2 EEF1A2 SNAP25 P4HB PRDX5 PRDM8 CAMTA2 GADD45G VKORC1 COX7A2 COX5A RHOU PCOLCE2 PPP1R14A SLC22A17 FRRS1L GNG11 RTN1 T…	4.72955e-14
drug:P5162:lenalidomide|dexamethasone-dn	16984	340	284	46	RNASE2 TUBA1A SMC1B LMNB1 RPL7 NPM1 CHSY1 PABPC3 FCGR1B FCER1G NFE2 NPM3 PSMA1 CRLF3 CLNS1A PROM1 SEC61G NMI MCM6 PRMT1 TFRC IFI30 PSMA4 CCZ1 S100A11 S100A10 TAF15 ANXA2 TGFBI MTHFD2 PPP1R14B SLC36A2 PTTG1 IFI16 ANXA1 CTSC NT5C2 GOLPH3 GTF3A DPYSL2 MEMO1 CKS1B SNRPE ARL6IP1 GGH OSBPL8	1	136	HBB CYTL1 PLAC8 NCOA4 IGLL1 TUBA1A CSTA RPS25 B2M CSF2RB HBD RPS15A HINT1 NUCB2 RPS27A FCER1A HBA2 ARPC2 RSL24D1 SRP14 VAMP8 NACA PSME1 CCL2 CD48 CHCHD2 RPS24 DYNLL1 NDUFA1 CTSG RPL10A COX6A1 MMADHC RPS15 SERF2 EAF2 COX6B1 GMFG GABARAPL2 SSR4 S100P CALM2 NDUFB4 ACTB NDUFV2 RPL9 INSIG1 LGALS3 RAC2 ITM2B RPL6 EEF2 RBX1 PFDN5 NDUFA4 GPX4 RPL23A HSD17B11 TXNL1 EEF1B2 TPT1 NSA2 NDUFB3 AP1S2 RCBTB2 SOD…	4.79616e-14
drug:P2854:hormone-dn	16984	469	370	66	APOA2 APOC1 APOE HP MAT1A AHSG C3 CYP1A2 HSD3B7 ITIH1 ASGR1 AQP9 ASS1 IFITM3 APOF CRP MIF CYB5B C4B SERPINA10 CYP7B1 HAMP F2 ADK HAL RPN2 FETUB POMP GLS2 UROC1 PROC SLC22A1 CP SERPINF2 IGF1 RGS16 KNG1 PPA1 SDS NNMT PYGL F12 PLG SLC17A2 AGT GRINA ACLY ABCB11 ITIH2 GSPT1 MORF4L2 CPB2 GLDC DDAH1 RCL1 HSPA9 SERPINA6 APOH GRB7 PROZ EBPL ARL6IP1 MCM10 HSD17B7 FGL1 C9	1	167	APOA1 APOC3 TTR FGA ALDH2 FTH1 RPLP1 CLU GNMT TMBIM6 ERRFI1 OAT UBB P4HB CHCHD10 C8G RARRES2 G6PC ANG GSTZ1 RNASE4 NDUFA4 RPS20 ACSL5 RPL36AL SOD1 RPL9 HPD CYP27A1 EPHX1 F10 INMT UQCR10 RPS14 HERPUD1 HAAO RETSAT NRN1 RPL10 COX5B ETFB ABHD14B ALAS1 CDO1 PTTG1IP CCS ABCD3 HSD17B4 PARK7 RPS27L SULT1A1 WBP2 CLEC4G UQCR11 UQCRH SLC25A5 GSTK1 FOXA3 GRHPR VKORC1 SLC6A13 COX4I1 NDUFA6 COX6B1 XBP1 WBP1L A…	5.17364e-14
drug:P4078:dimethyl sulfoxide-dn	16984	317	252	45	EIF4EBP1 SPP1 MTHFD2 IFITM1 IFITM3 GRINA RPL7 HMGA1 TMEM158 PSAT1 GRN HSPA9 MRPL17 SERPINH1 LY6E THBS2 SH2B3 MIF HAGHL GLG1 NRM RAPH1 IGF2BP2 AMIGO2 NAA38 VASN COL16A1 FAM111A RIN1 TRAP1 MRPS30 MAP3K1 AEBP1 DNTTIP1 SOX9 PLA2G7 DNAJA3 SLC2A1 TAF15 ZBTB12 TNFAIP2 RALBP1 EIF5B LEPROTL1 NPC1	0.999996	124	RPL3 RPL9 RPS8 RPLP1 FAU FTH1 RPL10A KRTCAP2 DBI RPL11 PRUNE2 ITM2B RPL13A UBA52 RPS5 RPL27 PCBP2 HIGD2A COX4I1 RPS14 CHAC1 RPL34 IMP3 RPL32 COX8A RPS9 CAV1 RPL37A MAF1 WBP2 VPS28 GADD45A NUPR1 RPL31 GHITM RPL23A RPL26 RPS15 COX6A1 DHRS7 CCL2 ATF4 RPS23 CYB5R1 NDUFA7 COX14 SLC30A4 EEF1B2 NSA2 COX7C RPL36 COX5B B2M ALDH2 NDUFA1 NDUFA2 NDUFA4 HBP1 UQCR10 GPX4 RPL35A ITM2C PDCD4 HAX1 GSTM1 UBXN1 RPL…	5.34017e-14
drug:P794:toxin|protein-dn	16984	354	298	56	MIF ILF2 PTTG1 CDK4 HDAC2 C4ORF48 LAGE3 RPL22L1 RAN EBNA1BP2 UBE2T DDX39A CDK2AP1 C1QBP DAP3 EIF4EBP1 LRWD1 HMBS CLTC TYMS DDX47 CCT3 PWP1 FDXR CSAG1 RNASEH2A WDR18 PARP1 MAGOH ALG8 GTF3A PCNA DPM1 GGCT TIMM17A CDC45 CCT2 TFB2M ITPA RRP36 PPP1R35 PPIL1 MRPL47 CARHSP1 MCM7 PSMA4 MAD2L1 NUDT1 NUP62 ACTL6A BIRC5 LAPTM4B PSMA7 SNRPF MTHFD2 RCN2	0.999996	141	RPL37A RPS6 UQCRQ UCHL1 RPS15 RPS29 RPL36 RPL32 CD63 NOP10 RPS8 NDUFB9 FAU RPS20 RPL18 UQCRH COX8A MANF JTB NDUFB2 NDUFA8 COX5B HINT1 TOMM7 PHPT1 PHB2 RPS11 UBL5 RPL27 TXNIP NDUFA4 COX6B1 RPL35A PSMB6 GUK1 AURKAIP1 RPL13 RPL3 COX7A2 UBA52 FBXO8 RPL10A COX7C RAMP1 EEF1B2 SEC61B DDX5 RPL34 SSR4 ZNHIT1 TBCA COX14 RPS27L PRDX6 RPL29 RPS5 NDUFC1 DYNLL1 TMEM14C SF3B5 SLC25A5 NDUFS5 NDUFA3 MRPL41 TXNDC1…	5.4623e-14
drug:P4122:ethanol|6alpha-methylprednisolone-dn	16984	390	348	64	DAO MED30 SNX10 PAQR4 KCNG4 THEM6 KCNC3 MEST SEZ6L2 IGF2 FGF11 TOMM20 PLXDC1 CALCA ATP13A2 CAMK2N2 RPL22L1 RELL2 SRP9 RNF44 TMEM86A CELSR2 CYP26B1 CASKIN1 DHCR7 HEYL CACNG4 CLEC2L TTYH3 CPLX1 PPP1R1B PLBD2 ZIC1 FAM189B GIT1 LY6E KCNJ10 GJB6 MFSD12 KCNAB2 SRD5A1 ITGB4 RBP4 SLC24A3 LRP11 PRRC2A SLC6A1 SRCIN1 TOMM34 CACYBP DAGLA SLC6A11 RAB3B POM121 RTKN DNAJA4 ANKH FGFR3 R3HDM2 ZMIZ2 CDK5R1 PPP2R2C…	1	159	CNTFR MFAP4 VAMP2 PRDX6 SST RAB3A ADAM11 LAMTOR1 COX7A2L SLC9A2 SULT1A1 HCFC1R1 NNAT DBI COX8A TMEM59L TIMM8B ABHD8 COX7B PTOV1 ZBTB16 ID2 GAMT SLC18A3 CPXM2 TMEM38A NAP1L3 CD99L2 SAR1B PI16 NDUFAB1 GNG3 NCS1 FA2H TRIM3 AP1S2 LYNX1 SUSD2 NEFL CCDC92 HIF3A PNRC1 INPP5J AGMO SLC26A7 PRRT1 ANKRD9 KLF9 PLEKHH3 DPP4 INSIG1 MPPED1 SHISA4 SLC25A23 CARTPT FXYD1 BCKDK CACNG7 GLRX5 FUT9 EPN1 FXYD7 MAPRE3 R…	5.88418e-14
drug:P3531:ethanol|5-amino-1-(5-phospho-D-ribosyl)imidazole|dopaminium(1+)-up	16984	331	263	39	GAD1 SERPINE2 CNP NPM1 APOE ERMN RPL22L1 CCP110 HMGB3 CUL4B DZANK1 FAM49B CTNNB1 TMEM88B PSAT1 PFDN2 RPL7 STMN1 SET PSMA4 PKP4 HEXB FUS SPP1 MOBP HNRNPU RANBP1 C1QBP HNRNPA3 ANKRD34B PSMA7 PCNA DEK CHTOP PSMD12 PTGES3 RABGGTB OXSR1 HNRNPK	1	128	PENK PLP1 SRSF5 QDPR TTR CKB B2M RPL3 NAP1L5 NDRG2 SPARCL1 PVALB KCNJ13 MAL SCG2 RPL4 RPS23 GAP43 RPL10A STMN4 RRAGA FEZ1 ASPA RPL26 RPL23A PLLP DBP SERINC1 EEF1A1 RPL5 RPS27A DSTN WFS1 RPL13 ZCCHC12 CMTM5 CIRBP EEF1B2 RPS5 RPL6 DNER SCN4B GOT1 VAT1L CALM2 GABRA1 RPL31 PDLIM2 GPM6B EGR1 ITPR1 NACA CLIC6 VDAC2 NDUFB5 NDUFS1 RPL18A SLC2A13 EID1 EIF4A2 NAP1L2 PRNP S100B ARL6IP5 TSPAN2 RPS15 RPL11 UQ…	5.92859e-14
drug:P3488:ethanol|5-amino-1-(5-phospho-D-ribosyl)imidazole|dopaminium(1+)-dn	16984	278	226	36	PLA2G7 HSP90B1 ARL6IP1 SLC39A10 CPLX1 GJB6 CHORDC1 DZANK1 TRIM32 CHST1 LAPTM4B HSPA5 CCP110 LMTK2 IFIT3 NLK CCT2 ATP6V1C1 PSAT1 FOPNL KCTD1 ATP6V1A HSPA1B DNAJB11 ZMAT3 HNRNPM BHLHE40 C4B CCT5 TIMM17A TCP1 SYNPR MAL2 SLC25A14 ANLN SLC24A3	1	114	SPARCL1 EGR1 NEFM ALDOC NDRG2 FBXW7 GSTM5 NAP1L5 MAL CKB FAM107A SLC25A18 FTH1 NDRG4 NPTN OAZ1 SCG5 DENND5A PINK1 MANF RTN1 NDFIP1 ABHD4 ALDH1A1 NEFL PENK PPP1CC PRNP EIF1B UNC80 RPS23 RPL26 ISCU CALM1 NDUFS2 LYNX1 VDAC2 BNIP3 NDUFB5 NAP1L2 NDUFV3 FAM3C HLF JTB TMEM50B SERINC1 UBL3 CLU OSTM1 SCN4B VPS28 RAPGEF2 IQGAP2 SLC25A46 MAP7D2 CACNA2D3 MAT2B SCOC FLYWCH1 COX7A2L HINT1 GHITM HMOX2 COX4I1 RP…	6.39488e-14
drug:P2053:pyrrolidine-dn	16984	310	274	51	TUBA1B CYP24A1 NPM1 ASS1 TUBA1A HNRNPA2B1 PMEPA1 HOXD10 CDH16 PSMB2 PSMD3 HMGB2 UCP1 MIF LUC7L3 SRSF6 TCP1 PAWR FBL AQP2 SLC34A3 HNRNPA3 MDK CCT2 IRF3 IFITM3 ATAD3A RPL7L1 IVNS1ABP NREP FUS RANBP1 SFRP2 REPS1 PCNA RTKN LYPLA1 SLC22A6 STK3 CKS1B RPIA GJA4 AMACR STMN1 RABGGTB ARMC10 HSPA9 GPX8 TTC13 UBE2S ALOX15	0.999993	132	ACY3 RPL9 RPL32 UBB ALDOB MT1A RPS8 PCK1 RPL3 COX7B COX6A1 DNASE1 RPS25 SGK1 RPL27 GPX3 TUBB2A BTF3 PEBP1 NDUFS5 SOD3 RPS11 COX5B RPS20 SLC25A3 ABHD4 RPS15 SLC25A4 TUBA1A SLC37A4 FBP1 NDUFB2 PARK7 RPL36AL TCF21 ATP6V0E1 NDUFB7 RPS29 RPL10A RPL29 MAP2K2 COX4I1 NDUFA11 ATOX1 NDUFB8 CCNI ITM2B PYROXD2 PNP RPL18A HGD ITM2C ID2 HADHB ECI1 CTNNA1 COX5A MRPS18A RPL35A RNASEK WDR1 FABP3 DDX5 OAZ1 RHOC WD…	6.41709e-14
drug:P2791:hormone-up	16984	466	368	76	APOA2 APOC1 APOE AHSG MAT1A HP ASS1 C3 CYP1A2 ITIH1 APOF MIF ASGR1 HSD3B7 CYB5B IFITM3 HAMP CRP RGS16 CYP7B1 AQP9 F2 SLC22A1 ADK SERPINF2 HAL SERPINA10 GLS2 POMP UROC1 C4B PROC ACLY RPN2 HSPA9 GRB7 KNG1 PPA1 CP FETUB SDS APOH ITIH2 SOD2 ARL6IP1 DDAH1 PLG GRINA GLDC IGF1 AGT RBP4 LAMP2 ABCB11 NNMT FMO1 F12 PYGL SFXN1 ENO1 HSD17B7 PDIA3 GSPT1 CTSB FKBP4 HSP90B1 CPB2 RCL1 BHLHE40 GM2A PROZ SERPINA6 …	0.999977	166	APOA1 APOC3 TTR FGA ALDH2 FTH1 RPLP1 TMBIM6 GNMT ERRFI1 P4HB CHCHD10 CLU NDUFA4 OAT INMT GSTZ1 G6PC SOD1 UBB ALDOB C8G HERPUD1 RETSAT KHK ACSL5 RARRES2 EPHX1 GLYAT RPS20 RPL36AL CDO1 ABCD3 ABHD14B RPL9 ETFB SLC25A5 RPS14 HAAO ANG RNASE4 HPD CCS PARK7 UQCR10 FBP1 CYP27A1 UBC PTTG1IP COX6A1 RPL10 F10 HSD17B4 RPS27L GPT COX4I1 TTC36 COX5B COX8A SELENBP1 SLC6A13 NDUFA6 BHMT2 UQCR11 ALAS1 UQCRH NRN1 W…	6.55032e-14
drug:P5548:inhibitor-dn	16984	259	213	43	LAMP5 STMN1 PDP1 FAM81A TUBA1B NLK PPP1R1B SLC39A10 DUSP14 VSNL1 CLSTN1 PPME1 PFDN2 TUBA1A GAD1 ATP6AP2 BHLHE40 CACNG3 NTM LMTK2 TMEM132A EXPH5 CPLX1 NUDT4 ATP6AP1 FAM49B DZANK1 PGK1 HS3ST2 GABRA3 TBR1 IVNS1ABP VMP1 DCLK3 POMP TNNC1 OSBPL8 KCTD1 DOC2A DEK HOMER1 ZMAT3 R3HDM1	0.999474	109	PTGDS EGR1 CKB PENK GLUL NGEF OSBPL1A CALM2 NRSN1 NDFIP1 ITPR1 RGS4 VTI1B SCN4B NPY SCG5 GNG3 CADM4 GABRA1 GPM6A PDE1B PVALB ATP2B2 TAGLN3 NDRG4 CRIP2 CPNE5 VIP SYTL2 AP2M1 RPL34 STMN4 CHCHD10 CAMK2G NEGR1 MAT2B TUBA1A IGFBP6 PPP1CA RCAN2 SERINC1 COX6A1 GAP43 CFL1 SLC2A13 STARD10 GABARAPL1 COX7A2 NAP1L5 CYP46A1 CCK ATP6V1D PFKM NR4A1 COX4I1 RPS15 DUSP1 COX6B1 CALM1 BNIP3 RPL26 SHISA4 SRSF5 PIN1 G…	6.59472e-14
drug:P845:Congenital pure red cell aplasia-up	16984	298	234	37	HAMP FASN PAH MAT1A SERPINA6 GLS2 PYGL SDS HRG AHCY APOA2 FADS2 AHSG PHLDA1 NNMT IGFBP1 SLC38A4 ITIH2 ELOVL2 SREBF1 F5 AGT RGS16 C3 APOE F2 CYP17A1 LACTB2 DHCR7 CREG1 MARC1 COL18A1 SQLE NUDT19 ASS1 ACACA ECM1	1	117	GOT1 FBP1 SERPINC1 ALDOB ACSL5 OAT TAT ME1 GNMT EEF1A1 DBI HPD INMT FTH1 SLC2A2 QDPR METTL7B KHK HAAO ANG G6PC RNF125 PLIN2 RNASE4 COX6A1 LGALS9 PCYT2 GSTK1 COX6B1 KXD1 SLC37A4 ABHD14B MFSD2A SAR1B APOM FXYD1 UQCRC1 ABCG5 ENPEP CISD1 MARC2 UGP2 ELOVL6 REEP6 UQCRB ACTB ACO2 AKR1A1 CIDEB GSTM3 TM4SF4 ADI1 PIPOX NDUFV1 GSTM1 ACOX1 LPCAT3 GSTA3 SLC25A1 CYP46A1 SLC29A1 CISD3 SUCLG2 PNP PSMB6 ERRFI1 DS…	6.65024e-14
drug:P847:-up	16984	312	234	34	SDS GLS2 NNMT IGFBP1 CFHR1 LAMP2 SLC38A4 PAH RPL22L1 ELOVL2 NIT2 RNF149 PAICS DIO1 SEC61G LACTB2 TTPA KMO HSPD1 PYGL PDE3B PGK1 CRP NDUFAF6 BBOX1 CYP17A1 CYB5B F12 NUDT4 SPP1 ASS1 PCNA PSMB2 ARL6IP1	1	117	TAT OAT GOT1 AADAC EIF4A2 RGN NDUFA4 ERRFI1 QDPR SULT1A1 BNIP3 AASS KHK CTH RNASE4 DSTN SDHB NDUFA6 RPL11 FMO5 HERPUD1 RPS27L RPL32 NDUFV2 ANG UQCRH GCDH NDRG2 GSTA2 ETFA UGP2 VAMP8 COX7A2 HAAO PRDX5 PIPOX HINT1 PHYH NRN1 MFSD2A G6PC RPS5 ECHS1 CYB5A CAT UGT2A3 RPS27A GSTK1 NACA RPL34 INMT UQCRB FAU NDUFB6 NDUFA8 SELENBP1 RPS14 GSTA3 GHITM RPL26 PEX7 MARC2 ST3GAL5 F13B PARK7 OAF GPX4 PGRMC1 BLVRB…	6.65024e-14
drug:P820:Congenital pure red cell aplasia-up	16984	332	234	34	PAH IFITM3 GLS2 RPL22L1 AHSG SEC61G SDS SERPINA6 NNMT SAA1 IGFBP1 C9 AMACR INO80 FADS2 ELOVL2 IGF1 CRP TUBA1B CYP1A2 PGK1 FASN HAL CFHR1 BST2 SREBF1 KNG1 KMO DHCR7 SERPINA10 SUCNR1 NAA38 PYGL ASS1	1	117	INMT AADAC SELENBP1 RPL26 FGA RPL31 RPS27A QDPR GOT1 KXD1 SDHB COX7A2 CTH COX5A RPLP2 UBA52 SULT1A1 NRN1 RPL4 RGN IFI27 HINT1 NDUFA6 DCT TAT RPS29 RPS5 P4HB ACSL5 RPL3 SAR1B RPS8 KHK DBI RPL13 RPL23A RPS11 UQCR11 FBP1 UBC TTC36 RPL27A EEF1B2 RPS23 ACTB NDUFS5 COX6A1 RPLP1 G6PC GHITM NDUFB11 RPL36 UQCRB FAU RPS14 RPL36AL HAGH NDUFC1 COX4I1 AKR1A1 UGT2A3 SLC3A1 IDI1 NUDT7 RPS15 ALDOB TST SERP1 RPL6…	6.65024e-14
drug:P850:Congenital pure red cell aplasia-up	16984	402	285	46	PAH SAA1 RPL22L1 IFITM3 SDS APOC1 INO80 IGFBP1 C9 SEC61G HP CFHR1 FGL1 C3 ELOVL2 CYP1A2 NNMT DIO1 KNG1 GLS2 SERPINA11 LAMP2 SERPINA10 NIT2 ABCB11 SLC38A4 TUBA1B PGK1 HAMP RNF149 MARC1 APOF ELOVL3 HOPX NAA38 PDCD5 C4B PSMA7 AHCY HSP90B1 HAL KMO BCCIP FADS2 DHCR7 SUCNR1	1	136	CHCHD2 RPL26 FABP1 RPLP1 RPL31 RNASE4 FGA RPS29 SDHB PEBP1 HINT1 RPL34 RGN QDPR AADAC RPS27A KXD1 RPLP2 APOC3 FBP1 UBA52 RPS14 UQCRB SELENBP1 COX6B1 RPL3 RPL13 RPS11 RPS5 CTH P4HB RPL27A CYB5A PHYH COX4I1 SULT1A1 COX5A CAT RPS27L NDUFB11 COX7A2 GOT1 HEBP1 INMT EEF1B2 NRN1 RPS23 RPL23A IFI27 RPL10 RPL36 RPL4 AASS NDUFA1 SAR1B UQCR11 RPL11 FAU TTR TAT RPL36AL G6PC DCT RPL32 PGRMC1 NDUFA6 DBI ACSL5 …	6.75016e-14
drug:P5178:toxin-dn	16984	280	242	29	ASS1 PABPC3 RLIM C4ORF46 ADD3 MIF PSAT1 HEXB HMGN1 RPN2 CCNB1IP1 CREG1 TNNT1 PODXL EBPL TOMM20 NOB1 TNNC1 XPOT CDK7 TRIB3 TSPAN6 SHMT2 C19ORF48 IFI6 TATDN1 RPUSD4 TUBA1A GRN	1	120	ID1 RPS8 RPL13A S100P RPL4 RPL3 EEF1B2 MT2A MSMO1 ID2 TXNIP EEF2 RPL11 ATF4 CCNG1 SLC25A6 ITM2B MT1X RPS25 RPL29 PCK2 GPX4 RSL24D1 IFI27 MT1E MT1F RPS29 PRDX5 DBI HADHB RPL36 NQO1 ARRDC4 RPL9 PFDN5 CHMP2A RPS20 AKR1C3 TMEM14C RPL6 TBCA PSME1 ALDOC UQCRH COX7A2L UBA52 CAMLG TST GABARAP CHMP5 HERPUD1 RPL32 HINT2 C4ORF3 COX7C OAT EDF1 OST4 TM7SF2 ACTR10 ETFB ALDH2 ARL6IP5 PTTG1IP COX8A RPL34 NUPR1 K…	6.79456e-14
drug:P5542:inhibitor-up	16984	312	250	48	LAMP5 STMN1 SLC39A10 PDP1 FAM81A NLK GAD1 TUBA1B VSNL1 PPP1R1B CLSTN1 PPME1 DUSP14 TUBA1A CACNG3 PFDN2 CPLX1 PGK1 POMP FABP7 LMTK2 EXPH5 NTM NDRG3 TNNC1 TMEM132A VMP1 DZANK1 NUDT4 HS3ST2 PFKP HOMER1 R3HDM1 FAM49B COCH ATP6AP2 GABRA3 TBR1 FAT1 TCP1 HSPH1 IVNS1ABP BHLHE40 KCTD1 PTTG1 DOC2A ATP6V1C1 BZW1	0.999955	123	PENK EGR1 CALM2 CKB OSBPL1A NGEF ITPR1 RGS4 VTI1B NDFIP1 NRSN1 SERINC1 GPM6A GNG3 SCG5 SRSF5 NDRG4 GABRA1 SCN4B NEGR1 NPY COX6A1 PDE1B CHCHD10 GLUL ATP6V1D TUBA1A CAMK2G CCK PPP1CA ATP2B2 RPL26 SYTL2 CRIP2 VIP MAT2B STMN4 CPNE5 GOT1 GHITM PVALB IGFBP6 NAP1L5 COX4I1 GAP43 COX7A2 SLC2A13 GDE1 CALM1 AP2M1 STARD10 BNIP3 RCAN2 CADM4 HPCAL4 FAU ARPP21 RPS14 TAGLN3 RPL4 TPPP GABARAPL1 NPTN PIN1 PFKM RAS…	6.82787e-14
drug:P4953:donor|dimethyl sulfoxide|agonist|insulin-sensitizing drug-dn	16984	600	521	107	HP RBP4 APOH AHSG SAA1 KRT18 AGT HRG UGT2B10 VHL ASGR1 COL18A1 TUBA1C UBD TUBA1B NPM1 TGFBI CPB2 PABPC1 LPA NNMT MZT2B PLG KLC3 SLC12A7 CP HSP90AA1 YWHAG C9 TMEM123 ANXA2 FN1 PTPN11 PHRF1 KPNB1 SULF2 NCL CFHR1 DHCR7 BAAT AQP9 NIT2 CCT5 DNAJA1 SMARCA4 USP9X MRPS35 DSP RPL7 ATP13A3 UGT2B4 RPL22L1 PSMA7 GTF3A F5 GGH METAP2 BAMBI PABPC3 CXCL1 DDX54 EBPL HSPD1 MYO1B SQLE PTDSS1 TNFAIP1 RELB PSMD14 MYH…	1	219	RPS8 MT2A ACTB RPLP1 SERPINC1 UBB CYB5R3 CD63 RPS20 ALDH2 B2M RPL13 UBC TPT1 MT1E APOA1 RPS14 RPL26 FTH1 RPS27A MT1B RPL13A MT1A TUBB2A P4HB MT1H APOC3 SLC25A3 OAZ1 MT1X RPL27A RPS11 EEF1D RPL31 SOD1 MT1M MT1G FAU MVD RPL3 ALDOB SRP14 RPL37A RPL34 RPL10A UGT2B7 MZT2B ALDH1A1 NDUFB2 PARK7 POLR2L ARL6IP4 PSME1 PGRMC2 RPL10 PPP2CB MANF SELENBP1 RPL4 PPP1R16A UGT2B11 SEC61B MKNK2 RPS15 RPL18 BHMT DST…	7.13873e-14
drug:P3510:ethanol|5-amino-1-(5-phospho-D-ribosyl)imidazole|dopaminium(1+)-dn	16984	271	208	35	SYNPR HSP90AB1 ARGLU1 TUBA1A THY1 FABP7 SLC12A2 PPP3CA STMN1 DEK LUC7L3 FAM81A APOE CRYM INO80 OSBPL8 CHST1 GRM5 RPL22L1 DZANK1 IDO1 HEY1 SERINC5 NRARP FOXG1 YWHAZ KDM3A PKP4 FAM49B ACTR3B BPTF SLC35D3 HNRNPK EPHB1 HNRNPD	0.999995	107	ID4 CST3 QDPR DBP PDE1B TUBB4A TUBA1A CHCHD2 SCN4B ATP6V1G2 SERINC1 PLLP OSBPL1A GRIA3 HIGD2A APLP1 GPM6A ITM2A S100B EID1 GLTP GPR17 UQCRB CCK LMO2 SST FAT3 RPLP2 NEXN PDLIM2 NPY C1QTNF4 PEBP1 DLGAP2 GPR155 PPM1K ELMOD1 GNAI1 USP2 COX6B1 PLP1 METTL9 SYT4 DENND5A EEF1B2 ATP6V0C CNTN1 SECISBP2L WASF1 NDRG4 PRKCB MAT2B RPS15 CRIP2 CFL1 GAP43 RGS10 RDX RPL36 WBP2 ITPR1 ITM2C ASPA PAPSS1 SLC4A10 BNIP…	7.14984e-14
drug:P3345:-up	16984	339	288	42	TGFBI BGN SERPINE2 IFITM3 TIMP1 PCOLCE FSCN1 ENO1 ALDH1A3 FXYD5 SEC61G GPNMB TNS3 F2R TUBA1B DPYSL2 ANXA1 TRIP6 FABP7 IGFBP3 HEXB ATP6AP1 SPARC SCD HSP90B1 COL22A1 THBS2 ATP6AP2 S100A10 CDK2AP1 HMGN1 GNS RHBDF1 TRAM1 ZMAT3 GANAB NREP HOXB7 MYOF ITIH6 COL8A1 LAPTM4B	1	137	RPS11 RPLP2 RPS25 RPL27A RPL11 RPL18A CCL2 RPS20 UBB MT2A RPS8 RPL26 RPL35A RPS14 CIRBP TPT1 EEF1A1 CYTL1 RPL27 RPL18 RPL13A EEF2 MT1A RPL4 NPTX2 CD81 GNG11 ACTB RPS13 CHCHD2 RPS27A RPS29 RPL31 RPS5 MYL6 OAZ1 PFN1 SSR4 OLFML2A FAU B2M CDH2 CSRP2 RPS9 PRSS23 RPL3 HINT1 P4HB SRPX SFRP1 ITM2C EIF3F RPL10A TMEM59 COX4I1 CTNNA1 CALM2 CSRP1 TOMM7 KLF9 SLC25A6 COX7A2 C12ORF57 RPL15 NDRG1 GPX4 MRPS6 TMBI…	7.41629e-14
drug:P5791:dimethyl sulfoxide|methapyrilene|hydrogen chloride-dn	16984	372	291	56	C3 PAH AHCY APOA2 FETUB APOC1 HRG PLG CYP1A2 FGL1 CRP FN1 RBP4 RPL22L1 ASS1 HP APOH UBD ACLY BAAT LOX BBOX1 HSP90B1 C9 ABCB11 RCL1 ASGR1 C4BPA BST2 ITIH2 CFHR1 F2 CPB2 IGF1 TTPA SHMT2 ITIH1 ADK HSPA5 PROC HMGN1 FABP7 MAT1A MIF RPN2 FAM120A NIT2 SERPINA10 F12 CXCL1 SOD2 SERPINF2 LIPC DAO CP DHCR7	0.999987	138	BHMT EIF4EBP3 BHMT2 SELENBP1 ALDOB SULT1A1 SULT1B1 PHYH CYP1A1 ACSM1 HPD CDO1 SLC37A4 GAMT UGT2B15 CTH SERPINC1 FGA RARRES2 PECR PTGR1 GNMT GSTA5 P4HB C8G QDPR CYB5A DPT NQO1 IFI27 FBP1 CAT TAT VKORC1 UGT2B17 ALDH3A2 CHPT1 ANGPTL3 GSTM1 F10 MGST3 PXMP2 RNASE4 HSD17B6 APOC3 STARD10 MARC2 CDK2AP2 PIGR SLC22A18 RPL10A HSD17B11 GSTA3 TM4SF4 SPINK1 DECR1 FABP1 ALDH1L1 PDHB CMBL ACOX1 TST PGRMC1 PODN T…	8.12683e-14
drug:P2543:4,4'-diaminodiphenylmethane|inhibitor|(2Z,3Z)-bis\{amino[(2-aminophenyl)sulfanyl]methylidene\}butanedinitrile-up	16984	246	224	41	ALPP OPN3 FBN1 NKX2-1 HEY1 PNMA2 ISG15 NTM SLC5A3 GABRE SLC38A4 SERPINE2 LMCD1 SCD NCF2 RGS20 POLM ARL4C CFHR1 GPNMB TNFSF9 FADS3 LIPG FADS2 PLXNA3 MEGF6 MSH4 GABBR1 COL5A1 RABL2B FZD2 DHCR7 GNE NREP G6PD CD55 CTSK ZNF322 LAMP3 SMARCAL1 AGTPBP1	0.999973	113	CYP1A1 AKR1C3 AKR1C2 TGFB1I1 LARP6 ACYP2 ABCG2 MAP1B NR3C1 GNAI1 RCBTB2 ARMCX1 SYNC SECTM1 AHNAK2 LSS ID4 SMARCD3 AKR1B10 RGL1 DDX60 CTSO RNASE4 ID3 NDRG4 SERPINI1 GLYR1 EPHX1 PINK1 PDGFD INSIG1 GSTM4 PPP1R3C CSRP2 MRPS6 ME1 RHOB SELENBP1 WDR47 SOCS2 JUND ACSL1 MYL5 GSTA4 TGFBR3 KCTD7 PMP22 RAB4B LMO3 PIR KLF2 ABHD4 SLC25A1 VIPR1 PCYOX1 TIPARP IL15 SULT1C2 HCFC1R1 LIMCH1 RGS5 CYP39A1 VIP ID1 OLFM…	8.18234e-14
drug:P4456:oxygen atom|2-butoxyethanol-dn	16984	407	302	63	APOA2 APOE RBP4 APOC1 PLG AHSG HP PAH C3 F2 HAMP AHCY APOF HRG C9 MAT1A CYP1A2 TTPA KNG1 HSD3B7 PROC SERPINF2 ITIH2 SLC38A4 PYGL C4B ELOVL3 CRP ASGR1 SAA1 FETUB ELOVL2 ITIH1 ABCB11 AGT SERPINA10 SERPINA6 GJB2 GLS2 LAMP2 IFITM3 HSPD1 HAL F12 COL18A1 IGF1 SLC22A1 SDS FGL1 F5 LIPC MARC1 AMACR NIT2 RCL1 LACTB2 HSP90B1 CREG1 SLC25A13 AQP9 PPA1 KRT18 MLXIPL	0.999845	142	APOA1 TTR FABP1 APOC3 FGA BHMT HPD ALDOB SERPINC1 GNMT FBP1 CDO1 PGRMC1 ALDH1A1 PHYH RGN RNASE4 CHCHD10 CYB5A CAT STARD10 C8G CTH APOB PIGR DBI CLU TTC36 EPHX2 QDPR NDRG2 P4HB TAT INMT AADAC ANGPTL3 ERRFI1 METTL7B MARC2 SLC2A2 SELENBP1 REEP6 NRN1 ETFA APOM GSTA3 GSTZ1 ACADM TMBIM6 HERPUD1 LGALS9 ANG GABARAPL1 SAR1B PLIN2 VKORC1 MSRB1 SULT1A1 COX6A1 KLKB1 NDUFA4 ALDH6A1 SDHB HAAO FXYD1 ETFB ACSM1 …	8.26006e-14
drug:P4599:17beta-estradiol|sucrose|messenger RNA|estrogen-up	16984	311	240	35	BAMBI MIF RPL22L1 VASN CD24 HILPDA PFDN4 IFITM5 TACSTD2 PPP1R35 LAGE3 S100A10 OGFR TNFRSF12A CKS2 SNRPG SAP25 LSM5 EN2 C4ORF48 ADRA2C ARPC5 IER5L ZNHIT3 DPM1 INHBB ANXA2 C1QTNF6 CEMP1 CDK7 LMCD1 WDR34 PMEPA1 TMEM132A SNRPE	1	119	NDUFB9 COX7A2 RPL27 RPS6 TPSG1 NDUFA4 COX14 RPS27A MYL12A UQCRQ OAZ1 RPS29 METRNL RPS20 SIVA1 SRP14 NDUFS5 MRPL41 NDUFA1 NDUFB2 COX17 RPS8 MYL6 SF3B5 NDUFC1 KCNK5 UBL5 RPL36AL PHPT1 DBI NME3 RPS27L HINT1 ZNHIT1 RPL35A GLRX5 ATP6V0E1 RPS3A NDUFA2 NDUFB1 COX5B RPL10A POLD4 ANAPC16 RPL9 RGS10 CCNI RPS25 ATP6V1G1 LGALS3 RPL34 STUB1 TXNDC17 JTB NOP10 CYB5A RPS13 JUND TOMM7 SERF2 TIMM8B COMTD1 SEC61B G…	8.68194e-14
drug:P2862:hormone-dn	16984	385	294	59	APOA2 APOC1 APOE MAT1A AHSG ASS1 HP CYP1A2 C3 HSD3B7 ITIH1 AQP9 ASGR1 CYP7B1 APOF CRP SLC22A1 ADK MIF SERPINA10 CYB5B SERPINF2 F2 HAMP PROC HAL UROC1 FETUB GLS2 C4B KNG1 PPA1 GLDC IGF1 HSPA9 CP RGS16 DDAH1 IFITM3 SDS AGT PYGL GSPT1 PLG NNMT F12 LAMP2 SLC17A2 GRB7 ITIH2 POMP ABCB11 SFXN1 SOD2 CPB2 HSD17B7 RCL1 APOH SERPINA6	0.999949	139	APOA1 APOC3 TTR FGA GNMT CLU G6PC ALDH2 OAT C8G ERRFI1 CHCHD10 GSTZ1 NDUFA4 P4HB ANG RARRES2 RNASE4 RETSAT HAAO CYP27A1 TMBIM6 HPD GLYAT FTH1 COX5B SLC25A5 ALDOB F10 ABHD14B ABCD3 HSD17B4 RPS27L UBB RPL36AL CCS KHK SOD1 TTC36 SLC6A13 GRHPR ACSL5 ETFB NRN1 COX7C UQCR10 NDUFA6 FBP1 BHMT2 HERPUD1 APOM COX6A1 UQCRC2 CDO1 UQCRH CLEC4G COX6B1 COX5A VKORC1 SULT1A1 UQCR11 SLC46A3 FOXA3 SAR1B ALDH3A2 NDFI…	8.88178e-14
drug:P5698:bleomycin A2-dn	16984	254	206	32	BPIFA1 FMO1 TNNC1 TCAP TNNI3 APLNR TIE1 IGFBP3 CSRP3 ATP6V1C2 CHST1 PTTG1 SLC36A2 TOMM34 HOPX KDR ENG MCF2L UPK3B FHOD1 SLC43A3 MAPK12 PRRC2B DNAJC7 ESM1 AFAP1L1 MTHFD1 ARAP3 USPL1 NAT9 EFNA1 CST8	0.999999	106	INMT IGFBP6 CFD EGR1 MYL9 CYP4B1 DBP PCOLCE2 SEMA3G SELENBP1 BMP6 ACTC1 NR4A1 ANKRD63 CD79B TNNT3 GPR155 NRN1 KLF2 PINK1 MAMDC2 GSN CCDC153 CLDN5 FXYD1 BPIFB1 CDO1 NDRG2 TNS1 TSPAN7 GPX3 CCPG1 CRY2 GSTA4 DUSP1 TXNIP BAG1 KLF11 GPIHBP1 YPEL3 PXDC1 RABAC1 PRICKLE2 CHCHD10 HPGD LIMS2 TMEM100 PAF1 ABHD14B ITPKB PER1 CD19 SLC9A3R2 MAF1 XDH GABARAPL1 RNF167 PGM5 RECK HERPUD1 UNC45B FOS IVD PPP1R14A NDU…	9.12603e-14
drug:P2864:hormone-dn	16984	452	389	68	F2R GPRC5A ANXA2 HP AGRN S100A11 TGM2 ARAP3 RPN2 TUBA1B FMO1 PDPN DRAM1 IFITM3 BGN SCARF2 ATP6AP1 COL4A1 CYB5B TNFAIP1 NRP1 LOXL1 ARL6IP1 DUSP7 STT3B HEY1 POMP CCND1 ICAM1 COL4A2 MIF GRINA NPPA EDN1 SLC6A6 ATP2A2 GLG1 IQGAP1 GPC3 KRT7 GJA4 C4B TNNC1 SPPL3 ACLY LBH ENG NCEH1 GRB7 SPTLC1 SPON2 ATP6V1C2 TACSTD2 PTK2 CD47 HMGN1 C3 CDH5 LLGL2 EFNB1 LAMB3 PODXL CDK2AP1 HDAC7 KRT23 MYBPHL FKBP1A SLC35E3	1	173	INMT SFTPD RPLP1 SFTPC ALDH2 RPS20 RPS14 SELENBP1 RPL9 TMBIM6 FTH1 CRIP2 ALAS1 TXNIP GPX3 CTNNA1 FAU PRELP CSRP1 MYL4 ERRFI1 PTTG1IP RPL3 UBB FHL1 TMEM100 BAG1 RABAC1 EIF4H GATA2 TSPAN7 RGCC SFTPA1 HDC SCNN1B VPS28 SLCO2A1 SOD1 MYL6 CAV1 ST5 WBP2 EPHX1 ISCU ACER2 CD81 UQCR10 RPS8 ADRB2 RNPEPL1 MYLK LGI3 MFAP4 CLDN18 P4HB SPOP HERPUD1 COX4I1 CCPG1 PRKACB DYNLRB2 KLF2 ICAM2 UBC RAB11B MYADM PRNP CO…	9.24816e-14
drug:P4124:ethanol|6alpha-methylprednisolone-dn	16984	426	389	65	MED30 SRP9 PAQR4 SLCO1A2 DAO ITGB4 CALCA RNF44 FGF11 TMEM86A CAMK2N2 ZIC1 SEZ6L2 PRRC2A THEM6 HEYL KCNC3 FAM189B R3HDM2 ADAP1 S1PR5 IGF2 BHLHE41 TOMM20 ATP13A2 MEST PROM1 DDR1 PANX2 CASKIN1 PLXDC1 CACNG4 RELL2 EIF1AX TTYH3 RPL22L1 PLBD2 ZMIZ2 AMOTL2 IRAK1 TRIB2 CELSR2 RRM2B CPLX1 OPALIN CLEC2L LRP11 SRCIN1 GRIN2C TNRC18 HOXB9 EFNB1 KCNAB2 LUC7L3 ALDH5A1 HUS1 CYP26B1 ARHGEF1 LY6E CLMN PLXDC2 DNAJA…	1	173	DBP RGMA NIPAL4 VAMP2 PRDX6 ABCG2 NFIX LAMTOR1 CNTFR HCFC1R1 NEFM RAB3A SLC9A2 FUT9 GAMT NNAT SST PAQR7 PER3 BCKDK PRIMA1 PRRT1 PLEKHH3 PTOV1 NAP1L3 TMEM59L PRELP CCDC92 ATN1 FA2H SPTSSB P2RY12 FXYD7 PALM ADAM11 CCDC107 SUSD2 SHISA3 COX7A2L EIF1B COX8A SLC25A23 SLC48A1 JPH4 OAZ2 OST4 NR2F2 CD99L2 TMEM38A FXYD1 CTDSP1 KLF3 NDUFS7 NKX6-2 POU6F1 MAPRE3 NFIC GNG3 RGS5 YPEL3 FAM168A KCNK3 ABCG1 NDUFA6…	9.24816e-14
drug:P653:zinc oxide|nanoparticle-dn	16984	347	267	45	HSPA5 APOE APOA2 S100A10 HSP90B1 APOC1 PDIA3 FMO1 HSP90AB1 IGF1 GLDC LY6E CYP7B1 ELOVL2 HSP90AA1 GLS2 CLDN1 HAL CANX IGFBP7 MIF SREBF1 LIPC PYGL SGPL1 CAPRIN1 CTSC EBPL TGM2 HSPD1 KRT18 ECM1 FPGS PSMD11 TRAM1 ERBB3 ACLY STT3A TRAP1 C9 NUDT4 DNAJB11 RPN2 APOF SPARC	1	129	A1BG G6PC BHMT2 RNF125 HACL1 APOC3 ACSL1 ALDH1A1 LGALS9 FABP1 EEF1A1 HGD CAT ALDH2 TPT1 HSD17B2 METTL7B SERP1 CYB5R3 RPL4 SEC14L2 LIFR ADIPOR2 P4HB RPL10 CNBP C8G SOD1 ADH4 RGN GSTK1 CROT RPL27A RPS6 NUDT7 OSGIN1 ACSM1 FGA PLIN2 DDC ME1 NDUFA4 RPL10A ACAT1 PARK7 LIPA EHHADH PPP1R3C CMBL CRELD2 RPS20 HPGD COX5B DCN SLC39A4 PNRC1 GSTM3 GSTA4 UBA52 AGPAT2 DMGDH GSTM1 PGRMC1 RPL15 LGALSL ALDH9A1 MDH1…	9.42579e-14
drug:P652:zinc oxide|nanoparticle-dn	16984	465	344	57	HSPA5 APOE HSP90B1 PDIA3 ELOVL2 FMO1 APOA2 HSP90AA1 TRAM1 S100A10 IGF1 APOC1 CPN1 HSPD1 CYP7B1 FADS2 C9 LAMP2 TRAP1 HSPA9 POMT2 PAH IFITM3 STT3A CANX HSP90AB1 LACTB2 ARL6IP1 POMP CRP ITIH2 BBOX1 MARC1 FPGS MIF YME1L1 SOD2 COPA CLDN1 PABPC1 BZW1 LY6E PGK1 RPN2 HNRNPK SGPL1 VAMP7 CCND1 LIPC ACTR2 CTSC CYB5B SSR1 DNAJB11 TGM2 NIT2 PTGES3	1	157	A1BG HACL1 FABP1 EEF1A1 APOC3 ALDH1A1 FBP1 UGT2A3 SERP1 RPL10 ACSL1 G6PC RGN HGD P4HB B2M INMT HSD17B2 ACSM1 ADH4 RNF125 PLIN2 CROT BHMT2 TSPAN31 MSRB1 RPL10A LGALS9 METTL7B EHHADH HPGD GSTK1 LIFR SCP2 ADIPOR2 SERINC1 HPD PHYH ALDH2 MDH1 MAOB PGRMC1 ACAT1 CYB5R3 ABCD3 EPHX1 C8G HSD17B6 CHCHD2 CST3 LIPA CAT ME1 ALDH6A1 HAGH ETFDH NUDT7 FKBP2 ADHFE1 SOD1 APOA1 OTC OSGIN1 GPD1 SAR1B RPL15 KHK CYP27A…	9.4813e-14
drug:P5538:inhibitor|protein polypeptide chain-up	16984	285	235	48	LAMP5 STMN1 SLC39A10 FAM81A PDP1 NLK GAD1 PPME1 PPP1R1B TUBA1B DUSP14 CLSTN1 VSNL1 CACNG3 LMTK2 FABP7 PGK1 NTM PFDN2 CPLX1 TUBA1A ATP6AP2 POMP EXPH5 TNNC1 DZANK1 HS3ST2 ATP6AP1 FAM49B TMEM132A COCH TBR1 NUDT4 HOMER1 BHLHE40 GABRA3 OSBPL8 VMP1 R3HDM1 FAT1 IVNS1ABP SYNPR OLFM2 SERPINE2 PFKP DOC2A ZMAT3 DPY19L1	0.999596	117	PENK OSBPL1A SCG5 NGEF PTGDS ITPR1 CKB EGR1 RGS4 CALM2 NRSN1 VTI1B GNG3 NDFIP1 NPY COX6A1 GPM6A CCK NEGR1 SCN4B PDE1B CAMK2G ATP6V1D NDRG4 GABRA1 CADM4 PPP1CA COX4I1 PVALB CHCHD10 VIP HPCAL4 SYTL2 MAT2B GAP43 SERINC1 CPNE5 TAGLN3 ATP2B2 CRIP2 IGFBP6 COX6B1 SLC2A13 STARD10 SRSF5 NAP1L5 GLUL COX7A2 STMN4 OAZ1 ARPP21 RASGEF1B RCAN2 RPS14 AP2M1 PIN1 PFKM GDE1 TUBA1A BNIP3 GLRB CALM1 COX5A SPCS3 GOT1 …	9.73666e-14
drug:P2851:hormone-dn	16984	448	347	70	APOA2 APOC1 APOE MAT1A HP AHSG ASS1 CYP1A2 C3 HSD3B7 ITIH1 CYB5B ASGR1 CYP7B1 AQP9 MIF APOF CRP IFITM3 SLC22A1 ADK SERPINA10 C4B SERPINF2 F2 HAMP PROC HAL FETUB UROC1 GLS2 POMP DDAH1 RPN2 KNG1 GRB7 GLDC PPA1 IGF1 ARL6IP1 CP RGS16 SDS HSPA9 ACLY AGT NNMT PLG LAMP2 F12 SLC17A2 ITIH2 ABCB11 GSPT1 HSD17B7 FMO1 SOD2 PDIA3 CPB2 GM2A RCL1 GRINA APOH SFXN1 SERPINA6 PSMA4 CPN1 FKBP4 EBPL PROZ	0.999985	158	APOA1 APOC3 FGA TTR ALDH2 ERRFI1 CLU TMBIM6 GNMT G6PC FTH1 OAT C8G RPLP1 P4HB GSTZ1 CHCHD10 INMT RARRES2 ANG NDUFA4 SOD1 RNASE4 UBB ABHD14B ACSL5 RETSAT HAAO RPL36AL ABCD3 HERPUD1 HPD CYP27A1 GLYAT CDO1 EPHX1 ALDOB CCS HSD17B4 ETFB F10 PTTG1IP KHK TTC36 UQCR10 GRHPR SLC25A5 COX6A1 NRN1 SLC6A13 RPS27L WBP2 COX5B ALAS1 SELENBP1 FBP1 BHMT2 GSTK1 APOM PARK7 UQCRH COX8A RPL9 COX6B1 CLEC4G SULT1A1 ALDH…	1.00808e-13
drug:P2852:hormone|N-benzyladenine-dn	16984	430	336	66	APOA2 APOC1 APOE MAT1A AHSG HP ASS1 CYP1A2 C3 HSD3B7 ITIH1 CYB5B ASGR1 CYP7B1 AQP9 APOF CRP MIF SLC22A1 IFITM3 ADK SERPINA10 C4B SERPINF2 HAMP F2 PROC HAL UROC1 FETUB GLS2 DDAH1 POMP KNG1 GRB7 GLDC IGF1 PPA1 RGS16 RPN2 CP HSPA9 SDS ACLY ARL6IP1 AGT PLG NNMT F12 SLC17A2 LAMP2 ITIH2 ABCB11 HSD17B7 GSPT1 SOD2 CPB2 FMO1 RCL1 APOH SERPINA6 FKBP4 CPN1 PROZ SFXN1 GM2A	0.999993	154	APOA1 APOC3 TTR FGA ALDH2 ERRFI1 CLU GNMT G6PC TMBIM6 OAT C8G GSTZ1 INMT CHCHD10 P4HB RARRES2 FTH1 ANG SOD1 RNASE4 NDUFA4 ABHD14B RETSAT ACSL5 HAAO HERPUD1 ABCD3 CYP27A1 RPLP1 HPD GLYAT EPHX1 ALDOB CCS CDO1 HSD17B4 RPL36AL F10 ETFB KHK TTC36 GRHPR SLC6A13 UQCR10 NRN1 PTTG1IP SELENBP1 GSTK1 FBP1 RPS27L BHMT2 SLC25A5 UBB APOM COX6A1 SULT1A1 ALAS1 CLEC4G COX5B UQCR11 ALDH3A2 WBP2 PARK7 COX6B1 FOXA3 …	1.06359e-13
drug:P4477:biotin|phosphoprotein phosphatase inhibitor-dn	16984	272	209	38	CTSB ASS1 AMACR DDAH1 DAO IGF2R PAH HSP90AB1 HSPA5 MIOX HEXB FAM111A CCDC6 SLC22A6 PROM1 FCER1G LAMP2 HSPD1 NCBP1 CXCL16 CRYM LYPLA1 KMO C4B GNPDA1 LRP2 FMO1 CDH16 PSAT1 BCAP31 PTCD3 RARRES1 MFSD1 RENBP RAPGEF5 IGFBP7 BST2 SLC25A13	0.999961	107	NDRG1 GPX3 ALDOB RETSAT FTH1 G6PC PGPEP1 AKR1A1 B2M MGST3 SGK1 PCK1 FBP1 CHCHD10 TSC22D3 FUCA1 SLC25A5 NAT8B ITM2B FABP3 UQCR10 ANPEP ACOX1 UBB PDZK1 APOM PEPD PXMP4 SLC4A4 TCN2 NDUFB1 TST SLC25A3 CD63 PIGR NDUFB9 OXCT1 SUCLG1 NDUFB2 UBC CST3 GSTO1 COX4I1 COX6A1 FAM151A ASPA ACMSD EPHX2 TIMP3 ECI2 IFI27 LRPAP1 NDUFS1 SLC22A18 RCAN1 RGN NDUFA12 GALM ECHDC2 TMBIM6 ATP6V1E1 HAGH UQCRB KLF9 BHMT2 NDU…	1.07692e-13
drug:P3482:ethanol|5-amino-1-(5-phospho-D-ribosyl)imidazole|dopaminium(1+)-dn	16984	316	262	42	HSP90AB1 ATP6V1A VSNL1 APOE PPP3CA SPTAN1 DZANK1 PSMA4 MAP2K1 ATP6V1C1 SQLE PLA2G7 PGM2L1 KPNA2 CCP110 CREG2 TIMM17A CPLX1 PPA1 RANBP1 PCNA NIPA1 NPM1 HEXB TCP1 POMP LUC7L3 MFHAS1 HEY1 RRP1 PSMB2 VPS26A CDC5L HSPD1 SRP9 ARGLU1 KDM1A EPHX4 PRPS1 STMN1 SERPINE2 CSE1L	1	127	SCN4B PRNP NEFL DUSP1 RASL11B EGR1 QDPR SST ARC SCG3 STMN2 EEF1A1 PPP2R2B VDAC2 GOT1 CCK RPL4 RPL23A RPRM APPL2 SPARCL1 PLP1 PPM1K COX6B1 RPS23 NDUFS2 GNAI1 CPEB1 TPPP RPL13 CAMK2G NPTX1 RPLP2 FOS ATP6V1G2 YPEL5 ATP1A2 UCHL1 AP2M1 PRICKLE2 WDR7 PAIP2 FRRS1L OSTM1 ELMOD1 RPL27A RPL3 RPL26 DCTN3 FEZ1 FAU ZCCHC18 NKIRAS1 NDUFS1 CRIP2 PRDX2 COX6A1 IDH3G S100B CAP2 SH3GL2 CHCHD10 ATP6V0D1 PARK7 MAP7D2…	1.08136e-13
drug:P4329:conjugated linoleic acid-up	16984	336	292	65	LUM DPYSL2 PYGL COL6A3 EPS8 PLS3 ASS1 NNMT YWHAZ LRP11 ITGAV HNRNPK COL4A1 IGFBP7 HSP90AB1 PTGES3 MTHFD1 CTHRC1 C3 PRRX1 COL4A2 TOMM20 NID2 YWHAG SLC19A3 YAP1 EIF2S3 TMX1 C6ORF62 FKBP9 COL1A2 COL15A1 AIDA TSPAN6 CCZ1B IARS2 CDK2AP1 SRSF9 SRP9 TRAM1 HIF1A PAN3 RLIM SMNDC1 BTBD1 EGFL6 SFRP2 XPOT PPP3CA VCAM1 ARL6IP1 KDR AEBP1 FBN1 CPNE3 ASPN TMEM123 NAA50 ACVR1 GOLPH3 BZW1 STEAP1 NONO UBA2 FNDC1	0.998577	138	ALDH1A1 FHL1 SPARCL1 ALDH2 HSPB6 RPL4 SERINC1 ENPP2 SRPX TXNIP GJA1 GNAI1 SCP2 CFD UAP1 RPS25 PRDX6 CCNG1 DPT PHYH VAMP3 FABP4 OAT MFAP5 NCOA4 GHR GNG11 CYB5R3 GABARAPL2 DEFB132 AOC3 RNF11 CHRDL1 CLDN5 RETSAT ALDOC RBP7 ACSS2 ALDH9A1 MYL9 HADH SUCLA2 NPTN DBI ITM2A CSTA DCN GHITM MMADHC ADH1C NME4 SEMA3G PPP1CC ITM2B ID1 PGRMC1 MFAP4 YPEL5 LTF SOD3 CYSTM1 RNASE4 PKD2 CXCL12 CPE TMBIM6 S100A1 AQP7…	1.13243e-13
drug:P92:1-methyl-4-phenyl-1,2,3,6-tetrahydropyridine-up	16984	284	265	46	TUBA1C ZIC1 TUBB3 TUBA1B SLC24A3 HSP90AB1 CIT SPP1 GABBR1 YWHAZ DPYSL2 PPA1 GPI PSMA1 MARCKSL1 TUBB RGS16 HSPD1 PTGES3 TBK1 HSPH1 SPARC HSP90AA1 CTNNB1 RAP1GDS1 CANX PDIA3 VSNL1 VPS26A PSAT1 CRYM DDAH1 NRCAM BHLHE41 XPO1 CDH11 TRMT5 SHOX2 CAPRIN1 RLIM DDR1 ZNF207 HNRNPA2B1 GALNT14 CALB1 STAT3	0.999999	128	TTR CST3 RPL23A NDRG4 ENPP2 CRYAB RPS23 CD81 NEFM MDH1 RPL32 EEF1A1 GABARAPL2 UBB PLP1 SLC25A5 CD63 INA NDRG1 GOT1 SCG2 TMEM59 HINT1 RHOA MAP1B RPS27A LRRC49 UBC GDE1 NFE2L2 MT1H GJA1 GLUL ITFG1 VDAC2 COPS4 RHOB UCHL1 DYNC1I1 FIS1 IGSF1 LMBRD1 DSTN TMEM47 SALL2 UBA52 PGRMC1 KIT CSDE1 ITM2B RPS29 PVALB JTB EPB41L3 CALCOCO2 PJA2 RABAC1 PCBP1 UBE2D3 B2M PBX3 CNTN1 CHCHD2 RPL36AL GABRA1 MGST3 SPHAR C…	1.20348e-13
drug:P4834:ochratoxin A-dn	16984	352	295	49	C4B PLG C4BPA ASS1 DHCR7 FASN C3 HP GM2A LIPC IFITM3 AMACR RPN2 RBP4 HSD3B7 KRT18 POMP CYP1A2 ABCB11 FN1 GRN ASGR1 PSMB2 TUBA1B AQP9 APOE DHFR KNG1 CMTM6 TP53 ENO1 IGF1 GNE DPYS G6PD COL3A1 RDH16 EFNA1 MIF CTSC GNS GJB2 PYGL APOA2 SLC6A6 ACLY TAP1 C9 BAAT	1	139	BHMT HBA2 PCK1 FABP1 GSTM1 APOA1 TMBIM6 GNMT G6PC PLIN2 HBB CLU ALDH1L1 FGA SLC25A1 CD81 OAZ1 UBB EPHX1 METTL7B SULT1A1 GCKR P4HB UBA52 PEBP1 DBI CTH PKLR MGST3 ITM2B RNASE4 ALDH2 PCYT2 GAMT MDH1 LGALS9 PAPSS2 SEC61B ACADM COX8A NDRG2 AKR7A3 RPS29 RPLP2 SLC22A18 NDUFB2 ACSL5 CSRP1 COX4I1 CRIP2 B2M GSTA5 ALAD NDUFV2 TSC22D1 NR0B2 ECHS1 UQCR11 HAAO COX5B DAD1 TTR SLC28A2 CYB5R3 TPRG1L DCAF11 RPS23 …	1.23457e-13
drug:P3554:ethanol|5-amino-1-(5-phospho-D-ribosyl)imidazole|dopaminium(1+)-dn	16984	348	295	44	HSP90AB1 APOE ARGLU1 SLC12A2 FABP7 GAD1 TUBA1A CNP PKP4 CTNNB1 FAM81A CRYM ARL6IP1 VSNL1 PPP1R1B LUC7L3 ZC3H11A YWHAZ MTPN BPTF RRP1 TULP4 CHD4 LHFPL3 HNRNPR PPP3CA KIF5B MAP2K1 ZC3H15 NDRG3 NRARP BCL11B CTCF EIF3A CPLX1 SPTBN1 CLSTN1 RBM25 GRM5 THOC2 PNN PDAP1 KLK6 PRRC2B	1	139	PLP1 ACTB SERINC1 QDPR PLLP NNAT CST3 AHCYL1 TUBB4A EID1 TMX4 APLP1 PDE1B CSRP1 DBP TUBA1A UCHL1 RNF14 SCN4B CHCHD2 GNAI1 MAP1B ID4 PCP4L1 RAB3A EEF1A2 ATP1A2 GOT1 ATP2B2 CALY GRIA3 VPS35 SH3GL2 GABRA1 ITM2C RTN4 OSBPL1A HIGD2A PCDH9 ASPA TMEM59L CAB39 KLC1 CNTN1 UNC13C SMARCA2 ITM2A CYGB FLYWCH1 CMTM5 GLTP NDRG1 WASF1 S100B TSPYL1 GPR17 RGS5 SRSF5 GLOD4 GNG11 CKB EDNRB MID1IP1 PFKM SCAPER RPLP2 …	1.23457e-13
drug:P2809:hormone-dn	16984	318	257	45	MIOX ASS1 CDH16 SLC22A6 SLC22A1 CLDN2 CYP7B1 NUDT19 FMO1 SLC22A12 DAO DDAH1 ARL6IP1 NCEH1 GRB7 SFXN1 CYB5B NOX4 CYP24A1 SERPINF2 PAH LAMP2 HSPD1 GLDC MFSD1 SOD2 MACROD2 NXT2 PROC MIF LLGL2 ENO1 PLAU TMEM33 IVNS1ABP LRRC8D PLSCR2 PDIA3 HOXB7 GM2A SUCNR1 MOGAT1 SLC35B4 HSPA9 DCLK3	0.999998	125	CYP4B1 ACY3 PDZK1 DNASE1 ALDOB INMT GLYAT BDH2 GUCA2B KHK G6PC NAT8 CHPT1 NDRG1 FBP1 SELENBP1 OXCT1 COX6A1 ABHD14B CDHR5 AMN AKR1A1 TTC36 TMBIM4 LRPAP1 COX8A ACADM CRYL1 MEP1A GSTZ1 BHMT2 NR1H4 PRDX5 CIDEB GABARAPL1 HINT2 S100A1 ERRFI1 LDHD SLC25A5 ALDH6A1 ABCD3 SLC12A1 F13B GRHPR SOD1 TCN2 PRSS8 TMPRSS2 SULT1C2 GHR SLC1A1 SGK2 SMPDL3A ALDH3A2 SLC6A19 RNF181 THNSL2 TMBIM6 RETSAT NDFIP1 DCXR SLC9A…	1.23901e-13
drug:P3509:ethanol|5-amino-1-(5-phospho-D-ribosyl)imidazole|dopaminium(1+)-up	16984	298	233	27	C4B DDN GJB6 MOBP PHACTR3 IFITM3 SEZ6L2 TMEM132A SLC2A1 SFXN1 FASN FAM102B PPP1R1B SLC24A3 ICAM5 ADAM9 GRINA RASGEF1A CANX HSPA5 PLA2G7 UPF3B LRRC58 HSPA1B RAB15 SRP9 DNAJC7	1	116	PTGDS B2M SGK1 SRSF5 FTH1 ALDOC NBEA FAM107A PLIN4 RTN1 RASL11B GSTM5 ARL6IP5 INSIG1 GPX4 IFI27 SCN4B NDUFV3 GSTM1 NAP1L5 ATP6V0E2 CDKN1A RRAGA GABARAPL1 GLUL HPCAL4 SULT1A1 RHOU DNAJB9 WFS1 LY6H HINT1 UQCRC1 TMCC2 MANF PPP1CC RESP18 UCHL1 PPP2R5B COX4I1 PFKM CIRBP RABAC1 HPCA SCG5 ROGDI CSRP1 P4HB SLC24A4 NDUFC1 RAPGEF2 PDCD4 GOT1 PRICKLE2 RAB33A PGRMC1 SLC25A18 PKIA AMFR PIGP LMO3 EPHX1 RHOB SO…	1.24567e-13
drug:P759:psychotropic drug|fluoxetine-dn	16984	306	249	32	SLC1A3 AKAP5 PPP1R9B DDN ENO1 ACLY APOE FKBP1A MORF4L2 CARHSP1 SFXN1 SPRED1 INTS1 SOD2 GJB6 SPARC ZIC1 SERPINE2 FARSB DCLK3 ECEL1 PPA1 RNF145 CD47 PRPS1 TRIM28 STRAP CNP CRYM CCDC6 SNRPF HNRNPM	1	122	CST3 RPL9 HPCA PTGDS NDN UBA52 PRNP MT3 RPL10A RPL18A PDE1B RPLP1 NDUFA7 UBB SST COX6A1 WFS1 UQCRH RPL36AL NDUFA4 MMD2 RPS25 C2CD2L RPL26 NAP1L5 SPOCK3 RPS11 MFN2 UCHL1 AP2M1 BRK1 GAP43 COX5A ATP1A2 ISCU CACNA2D3 NDUFA3 NDUFS8 CNTN1 S100A1 AKR1A1 CSRP1 NDUFB3 WIPF3 GSTM5 NDUFA6 ATP6V1D NDUFA12 GABARAP PTTG1IP NDUFA1 CMTM5 NDUFS3 NDRG4 FAM107A SPCS1 PRDX5 TBCA SLC25A5 VPS28 ARL3 RPS15 HINT2 UQCR10…	1.25899e-13
drug:P3497:ethanol|5-amino-1-(5-phospho-D-ribosyl)imidazole|dopaminium(1+)-up	16984	272	212	20	DDN PHACTR3 MOBP SLC2A1 SEZ6L2 SLC24A3 GJB6 LAMP5 ACTR3B CHST1 UPF3B ADAM9 SFXN1 ICAM5 APOE TMEM132A FAM102B KCTD13 FOPNL SNRPB	1	108	PTGDS SGK1 RASL11B B2M PLIN4 NBEA NDUFV3 RTN1 LY6H DBP RAPGEF2 HPCA UQCRC1 SCN4B CIRBP GPX4 RAB33A HPCAL4 RHOU PDCD4 INSIG1 PRICKLE2 WFS1 ATP6V0E2 CDKN1A CCK RRAGA LMO3 ARL6IP5 PPP2R5B ALDOC COX4I1 PKIA NDUFA1 TMCC2 AMFR SULT1A1 GSTM5 USP2 SLC30A4 RABAC1 RHOB NAP1L5 GDE1 PFKM NDUFC1 YPEL5 NFKBIA SRSF5 ADCY9 ST3GAL5 RBFOX3 PPP1CC SNX24 SCG5 SLC24A4 DNAJB9 RESP18 LYNX1 GNA11 PCNP MAL PIGP UCHL1 FBX…	1.26343e-13
drug:P4119:water|ethanol|6alpha-methylprednisolone-dn	16984	426	393	90	ITGB4 DAO CALCA IGF1 ZIC2 SLC13A4 MED30 ITGBL1 GPC3 DHCR7 FKBP9 IGF2 RBP4 FNDC1 RPL22L1 CCNF LRP11 ASPN NMUR2 PAQR4 LUM TMEM86A CDK5R1 TUBA1A ZIC1 TUBB3 CLDN1 RELL2 EFNB1 BMP7 HOXB9 CHRNB3 SNX10 CYP26B1 GREM1 POLE3 SLC24A3 PLXDC1 MRC2 TP53I11 FMO1 MRPL17 FKBP4 SPAG5 CACNG4 APBA2 RTKN2 GLRX3 GJB6 BGN CDH7 PIGA SRP9 TSPAN17 TIPIN PRRC2A NID2 AGPAT5 THY1 SP1 ADAMTS2 PLBD2 PDE12 NTM CREG1 SLC22A6 GAB…	0.999203	174	DPP4 SULT1A1 CPXM2 MFAP4 SLC9A2 SLC26A7 PPP1R1A PTGDS NUPR1 MPZ PI16 ABCG2 SLC6A13 IGFBP5 KCNJ13 COX7B SHISA3 ZBTB16 PRDX6 MYOC DBP CHODL SST PRELP SMOC2 SPTSSB EPHX1 NDUFB6 FKBP5 BMP6 CHST15 CLYBL SCARA3 RAB3A NEFM TAGLN3 KCNJ16 CNTFR CAMK2G NCS1 SFRP1 GPD1 ID2 GSTM5 NECAB1 PIGP TIMP3 DDR2 TSC22D3 TUBA1A ADAMTSL3 PPA2 MFAP5 NAP1L3 CGRRF1 OLFML2A TGFBR3 AK3 CCDC107 FBLN1 GSTA1 KCNA5 INSIG1 GRIA1 …	1.27676e-13
drug:P3748:oligonucleotide-up	16984	435	379	73	HSPA1B S100A2 MIF CKS2 HSPH1 S100A11 SH3KBP1 DNAJA1 RPL22L1 MMP1 SNRPG HSP90AA1 IER5 ALDH1A3 SPRR1B TIMP1 KRT17 IFITM3 C4ORF46 NOP58 SPRR1A SERPINB2 TUBA1C SPRR3 KRT5 SEC61G PTTG1 PSMA1 AHSA1 PFDN2 KRT14 PMAIP1 LGALS7B PTGES3 HSP90AB1 UPP1 CKS1B TOP1 KRT18 ANXA2 KRT13 RLIM ANXA1 RAN NPM1 SNRPF LAMB3 PHLDA1 TRIB3 PTRH2 CENPW YWHAG ENO1 RPN2 KRT6B SLC20A1 LIPG SET CDH3 RACGAP1 HSPA5 S100A10 KLF5 TU…	0.999999	169	MT2A RPL27 RPL32 RPS20 RPS13 BAG3 RPL34 UBC MT1H FAU ZFAND2A RPL13A DYNLL1 RPL11 MT1X NOP10 UBA52 UQCRH IER2 MT1E RPS25 CSTA RPL9 RPL23A HMOX1 GADD45A RPL36AL PPP1R15A ATF4 RPS29 RPL10 ACTB FTH1 HERPUD1 DBI SOD1 RPL3 ERRFI1 SRP14 COX8A EGR1 COX7A2 PFN1 CFL1 TBCA NDUFAB1 RPL36 C19ORF33 DNAJB4 TPT1 UQCRQ RPL29 OST4 DYNLT1 NDUFA1 EEF1B2 FOS NDUFA12 DCAF6 RPS5 COX6B1 NDUFA4 PFDN5 PPIL3 COX7C MAFF DAD…	1.35114e-13
drug:P3438:-dn	16984	450	399	79	CCL3 ACP5 MMP9 APOE CTSK CXCL1 SAP25 FCGR3A ADAM8 GRN TGFBI CD163 HES7 MIF SPP1 PLAU APOC1 TUBA1A THOP1 ANXA1 RNF149 TUBA1B IFI30 TUBA1C CXCL5 ATP6AP1 C6ORF62 CTSB S100A10 CXCL3 ADAP2 GPI TMX1 SLC16A3 CCL7 NBPF15 NUP62 CLEC11A ARPC1B OGFR EMILIN2 MFSD1 BCAP31 CHSY1 CCT4 RELB SLAMF8 CBX3 SLC39A8 CCT2 NCOR2 RHBDF2 EFTUD2 MAFB PLOD3 PTDSS1 MARCO CEMP1 SPARC ENG TFRC ITGB2 HEXB TUBB3 ZNF713 PTRH2 AGA…	0.999998	176	CD63 IER2 FOS RGS10 SGK1 CCL2 HMOX1 RPLP2 ZFP36 OAZ1 DUSP1 JDP2 NFKBIA RPLP1 FCGRT RPS20 EGR1 GMFG RPL35A RPS8 DBI HOMER3 HEBP1 TUBA1A PNP RPS24 RPS6 MVP SDF2L1 EEF2 TBCA RPL26 JUND MANF SRP14 RPL11 NDUFS5 IL4R PRNP CDC42EP5 CFD RPS29 CRYL1 METRNL MPP1 LIPA RPS14 CST3 RGCC NDUFA8 RGS2 BLVRA COX14 PLEKHO1 CALM2 GPR183 RPS13 QSOX1 PEBP1 GLUL UBC SIDT2 CKB RABAC1 STAT6 RPL36AL JUNB PHOX2A RPL27 P4HB…	1.38556e-13
drug:P2348:ethanol-up	16984	288	252	43	SFXN1 SLC2A1 CSNK1G2 YWHAZ PDIA3 PPP1R9B UBE2O HDAC2 LEPROTL1 FARSB PSMB2 MTPN COPB2 EEF1E1 HMGA1 DCLK3 HOMER1 SQLE KIF3A TMEM65 CARHSP1 UBE2Q1 PPA1 FCER1G TULP4 GM2A GET4 CMTM3 EMG1 ATXN2 HSPD1 MRPS17 CD47 IGFBP7 TRIAP1 ITGB5 PSMD11 GAR1 PDP2 VKORC1L1 ADRM1 TTC39C SNRPA1	0.999999	123	XBP1 SGK1 CHCHD10 NDUFB8 GUK1 NDUFA3 DYNLRB1 BRK1 PPP2R5C HINT1 MRPL53 NDUFV3 NDUFA12 DBI WSB2 SPCS1 TMBIM6 PITPNM2 RPL37A BTG1 RBX1 EIF3F UQCR10 MTCH1 NDUFS4 RHOB GSTO1 ARL6IP5 NDUFC1 UBL3 LIAS CELF2 PREPL PITPNA SSR2 FIS1 GSTM1 VDAC2 SLC25A5 PCBD2 ISCA1 AP2M1 SDHB ARL3 NXN SEL1L NDUFA5 NDUFB3 METTL9 EPHX1 GHITM CHP1 DDX24 NUDT16 SCOC PPP2R2D MRPL20 NACA TRAPPC2L NDUFA7 RPL29 NME3 NUDT18 SCARA3 …	1.41442e-13
drug:P5697:bleomycin A2-dn	16984	231	189	32	BPIFA1 TNNC1 CSRP3 TNNI3 TCAP FMO1 TIE1 HEY1 APLNR IGFBP3 MCF2L TOMM34 LUC7L3 UPK3B HOPX ATP6V1C2 PRRC2B MYH6 NOTCH3 KDR CHST1 PTTG1 SLC36A2 TNNT2 FHOD1 PCNT ARAP3 MAPK12 PLXDC2 DNAH6 NPPA ARGLU1	0.999986	99	ACTC1 MYL9 IGFBP6 INMT MAMDC2 CFD PCOLCE2 BPIFB1 DBP EGR1 GPR155 TAGLN TNNT3 CCPG1 CYP4B1 GSN BMP6 NR4A1 SELENBP1 NDRG2 DUSP1 TXNIP KLF2 FOS CRY2 SEMA3G ACTG2 PINK1 HPGD PER1 LMO2 CCDC153 YPEL3 OTUD1 TNS1 ANKRD63 NRN1 CNN1 SMPX PGM5 FXYD1 MYOZ2 PAF1 ST5 ITPKB RNF167 MYL6 PXDC1 SLC9A3R2 TPM2 LTBP4 TMTC1 TSPAN7 RABAC1 MAF1 GSTA3 GABARAPL1 FLNA RECK ALDH1A1 SOD1 KLF15 PCP4L1 HERPUD1 MYH7 MAP1LC3A HL…	1.42331e-13
drug:P2784:hormone-up	16984	305	244	45	MIOX ASS1 CDH16 SLC22A6 CLDN2 SLC22A1 FMO1 NUDT19 SLC22A12 CYP7B1 DAO CYB5B DDAH1 CYP24A1 NOX4 NCEH1 GRB7 SERPINF2 ARL6IP1 SFXN1 PAH LAMP2 GLDC MFSD1 MACROD2 HSPD1 LLGL2 GM2A NXT2 APOA2 PROC IVNS1ABP LRRC8D HOXB7 PLAU HSPA9 MOGAT1 PLSCR2 SOD2 SUCNR1 ENO1 TMEM33 DCLK3 PDIA3 UROC1	0.999984	120	CYP4B1 PDZK1 ACY3 DNASE1 ALDOB GLYAT INMT BDH2 KHK NDRG1 GUCA2B CHPT1 G6PC OXCT1 FBP1 NAT8 ABHD14B CDHR5 SELENBP1 AMN TMBIM4 AKR1A1 ERRFI1 LRPAP1 TTC36 COX6A1 MEP1A CRYL1 ABCD3 GSTZ1 BHMT2 ACADM NR1H4 CIDEB GABARAPL1 ALDH6A1 SLC12A1 F13B COX8A LDHD TMPRSS2 RETSAT GRHPR S100A1 THNSL2 PRSS8 SULT1C2 SLC1A1 NDFIP1 GHR TCN2 SGK2 ALDH3A2 IVD SLC26A4 SLC6A19 SOD1 CSRP2 HINT2 RNF181 DDC SLC9A3R1 TREH TIM…	1.42664e-13
drug:P4827:ochratoxin A-up	16984	363	312	45	APOE CTSB ASS1 IFITM3 ACP5 DAO GRN TUBA1B GNS IGF2R BGN SNRPB LOXL1 CDK4 OPLAH IGFBP1 SERPINH1 C4B ARPC1B ATP6AP1 PSMB2 GRINA FASN SLC22A1 FKBP1A ANXA2 VHL YWHAG SPARC LBH TUBA1A PRMT1 CHDH PAX8 CPSF4 IGFBP3 MMP14 S100A10 SPP1 DDR1 RPN2 GM2A PSMA7 BMP7 PCOLCE	1	145	MT2A HBA2 HBB PCK1 RPS9 AKR1A1 SLC37A4 CST3 ITM2B G6PC EEF2 PFN1 RPS13 MGST3 PTGDS CLU CKB CRTAP DBI RPL11 RPLP2 RPL10 SLC6A8 NDUFA3 GABARAP SLC25A4 SOD3 CAPNS1 ATP6V0C TCN2 TPT1 COX5B ALDOB CSRP2 FAU NDUFB4 RPS27L MYL9 AMN CD81 RPL18 RPL13A RPS14 TSC22D1 SLC22A5 SLC22A18 RHOB RPS8 MPST NDUFV2 RPS5 FBP1 FCGRT OAZ1 MRFAP1 RPL6 PEBP1 ALDH2 TXNIP SLC25A1 CRIP2 AUH NDUFA4 RPS15A SUCLG1 SLC25A5 PFKL C…	1.44329e-13
drug:P4873:aflatoxin B1|mycotoxin|dimethyl sulfoxide-up	16984	427	354	59	GDF15 S100A2 RBP4 HP NNMT SAA1 FGL1 FDXR TUBA1B AGT APOH EBNA1BP2 ANKK1 IFITM3 IFITM5 APOC1 DDB2 TM4SF1 CD70 TYMS SULF2 SEC61G CCT2 NOP16 CCT4 PCNA SPP1 S100A10 C1QBP POMP SPON2 IGFBP7 PDIA3 GGCT CPB2 PLK2 TK1 MIF SNRPE CD24 HSPD1 ISG15 PDCD5 PPP1R35 PTTG1 PHLDA2 GAR1 DAP3 EFNB1 GPI UBD NUP62 HMGB2 CCZ1B PSMD14 ZNF713 USP9X TRIP6 C6ORF62	1	160	RPL37A RPL11 TTR MT2A OAZ1 FABP1 RPS20 RPS27L RPS23 APOC3 RPL35A UBB RPL27 RPLP1 RPS14 CD63 MYL12A COX7C RPS8 RPS6 RPL32 RPLP2 NDUFA4 AKR1B10 TPT1 RPS11 MYL6 IER2 RPS29 HINT1 RPS25 TOMM7 AKR1C3 SPINK1 NDUFB9 NDUFS5 PARK7 RPL36AL DBI FTH1 ISCU VAMP8 SRP14 SEC61B SLC25A3 RPL34 RPL18 GSTO1 UGT2B7 RPS24 RPL13 RPS15 NDUFC1 MT1A DSTN NDUFA1 TXNDC17 UBC UQCRH TM4SF4 MT1H GSN UBL5 TP53I3 COX8A RPL3 CHCHD…	1.52101e-13
drug:P4239:water|ethanol|6alpha-methylprednisolone-dn	16984	539	489	89	DAO ALOX15 DHCR7 CLDN1 CDK5R1 RTKN2 IGF1 TMEM86A PCOLCE GPC3 PIGA ASPN KLHL17 LLGL1 LUM MIF CSPP1 APLN PLOD1 MRPS17 TMPRSS5 ITGB4 HSD17B7 CDK5RAP1 LFNG TMEM67 POLD2 TNFRSF11B PTTG1 CTNNB1 CALCA SAMD5 FKBP9 RPL7 DGKI MTHFD1L NID2 SLC5A6 SQLE REPIN1 TGFB3 WNT7A RBP4 AIMP2 TMEM119 TRIB2 DOCK9 DEPDC1B PREP CDC25B TTI1 BGN AARS2 ITGB8 NCLN FADS2 TUBB3 PLXNA3 SLC13A4 SLC6A11 CCNJ NTM ZBTB1 YAP1 ALG8 C1…	1	207	ALAS2 SLC9A2 CPXM2 MYOC MFAP4 DPP4 PI16 SLC4A1 HBB HEMGN IFI27 JOSD2 SULT1A1 NPY PPP1R14A NEU4 MPZ S100A1 UQCR11 NIPAL4 SFRP5 EGR1 IGFBP5 FECH RABAC1 DUSP1 SLC26A7 NAT8B NDUFA11 MVD ZBTB16 GPD1 NDUFS8 MPST PXMP2 CDK2AP2 NR4A1 CRISPLD2 OAT SELENBP1 TST TSC22D3 PLCD4 AOC3 RND2 DBP AGMO AHSP UQCRH IER2 IMP3 PPP1R1A FCGRT DDR2 RPL32 PDE1A TLR3 LGI4 ARPP21 DCN PCYT2 NR2F6 LTBP4 FOS KCNJ16 PAFAH2 CDK18…	1.52989e-13
drug:P3541:ethanol|5-amino-1-(5-phospho-D-ribosyl)imidazole|dopaminium(1+)-dn	16984	317	263	39	HSP90AB1 TUBA1B GAD1 HSPH1 HSP90B1 CACYBP CHORDC1 CCP110 FABP7 HEXB HNRNPA2B1 ZIC1 STMN1 ERMN CTNNB1 LAMP3 PTGES3 HNRNPA3 CCT6A PLA2G7 KCNJ10 APOE YWHAZ ATP6V1C1 HSPA4L PAFAH1B3 SLC39A10 DNAJA1 PRMT1 PCNA PPA1 ANKRD34B NDRG3 SRRT CHTOP PSMD14 HNRNPM CPLX1 VSNL1	1	127	CST3 ACTB EGR1 CHCHD10 ITM2A APPL2 UQCRB COX5A TSPYL4 GOT1 MID1IP1 FEZ1 PLP1 QDPR OSBPL1A TPPP COX6B1 COX6A1 NDUFB10 RTN4 AHCYL1 SNX3 GABARAP CKB UNC13C PMP22 S100B NDUFB7 NEFM SLC25A18 NDRG4 GNG11 VPS28 PCBP1 GLUL NEFL ATP1A2 NDUFS5 NDUFB3 GABRA1 NDUFS7 INA TAGLN3 PVALB GPR37L1 UQCRH COX4I1 CHCHD2 UQCRC1 PLLP IGIP ATP6V0D1 HAX1 SLAIN1 PRDX5 MICALL1 ACYP2 NKIRAS1 VDAC2 PNP TMEM126A TMEM47 CAPNS1 …	1.53877e-13
drug:P4330:conjugated linoleic acid-dn	16984	437	371	60	HSP90AA1 SH3KBP1 IFI30 CTSB PPA1 MMP9 C4ORF46 HEXB TUBA1A SNRPG PSMA4 ARL6IP1 RAN YWHAG YWHAB CCT3 PLA2G2A MAFB MFSD1 PSMA7 HSP90AB1 PSMD14 CTSK TGFBI PTGES3 IFITM3 TUBB3 PPT1 PLA2G7 BLCAP AMOTL2 MRPL3 HNRNPK DNAJA1 DPM1 GPNMB RPL7L1 TREM2 DAP3 HSP90B1 FAIM TUBA1C STEAP1 MRPL15 ACBD3 ANXA2 CCT2 PSMA1 APOC1 BZW1 MARCO HSPA1B BCAP31 EPS8 GPR137B MS4A6E PCNA CCR1 GRN PFDN2	1	166	HBA2 RPL34 RPS20 RPL9 LEP RPL13A RPL32 RPL23A OAZ1 RPL36AL PLIN4 RPL6 CHRDL1 RPL3 SRP14 RPS29 RPL27 TXNIP ACTB CD63 AKR1C3 PFDN5 TPT1 DBI FTH1 EEF1B2 UBA52 DYNLL1 CAV1 COX7A2 RARRES2 PRKAR2B SOD1 IRF2BPL RPL11 FAU RPL26 NDUFB5 COX6B1 ZBTB16 SLIRP CIDEA NSA2 GPX3 PARK7 ATF4 TUBA1A TUBB2A RPS11 CD52 GPX4 NDUFA4 RPS13 DYNLT1 COX7A1 TUBB6 MRPS6 DCAF6 PRDX6 RPL29 MT1X HBM DAD1 RPL10 COX7C TMEM14C ID1 …	1.55542e-13
drug:P762:psychotropic drug-up	16984	298	247	33	TUBA1B ARGLU1 CPLX1 VSNL1 OPALIN GRINA CAMK2N2 PSAT1 TUBA1A CHST1 ACLY KCNAB2 PDAP1 ATP6AP1 BTBD1 DDN YWHAB KLHL17 KLHDC10 LUC7L3 STMN1 ATP6V1A CLDN12 BRD3 PPA1 TFRC SOD2 KPNB1 SLC5A6 SEC61G FBXO41 SOX9 TTC13	1	121	PLP1 RPS29 RPL3 DBP UBA52 RGS4 RPS25 QDPR RPS14 IGIP ATP6V1E1 SVOP CPE EIF3F RAB6B GSTM5 SPOP REEP5 REEP1 NDUFV1 IGFBP5 TUBA1A EDF1 PPP1R1A NDUFS7 GHITM PRKCB OAT HPCAL4 SRSF5 KCTD2 GUK1 DIRAS1 UQCRC1 RAB5C PRDX5 OLFM1 BCAS1 RPRM LRPAP1 NDN PVALB FAM131A RAB3A PCYOX1 SNCB RNPEPL1 C2CD2L PKIA NPY RASL11B SST PSMB6 MANBAL LMO2 APLP1 WSB2 ADARB1 RABAC1 CPNE6 RPS9 AIP CTNNA1 NFE2L1 MAF1 SERINC1 SUGP1…	1.60871e-13
drug:P2375:ethanol-dn	16984	198	174	29	CP GJB2 GLS2 IGFBP7 RCL1 SFXN1 HSPD1 EBPL GSPT1 TTC39C PPA1 PDIA3 PSME4 GM2A PDP2 TRAM1 SRD5A1 GLDC DDAH1 CHUK DPAGT1 GNS TMEM38B CARHSP1 PTPRE CMTM6 FADS2 CLDN12 NRP1	0.99998	93	ALDH2 SCP2 DBI TMBIM6 ERRFI1 CHCHD10 C8G RNASE4 GSTZ1 STARD10 ABHD14B ETFA RPS27L ETFB SLC25A5 NDUFA4 CCS GSTM1 VKORC1 PTTG1IP GSTK1 RPL36AL XBP1 GPT EPHX1 GRHPR EPHX2 ALAD ECHS1 ALDH1L1 TMEM14C RETSAT ACSS2 BLVRB SLC6A13 UQCR10 ACADVL GSTO1 SLC25A15 ADH5 ALDH6A1 S100A1 SUCLG2 HADHB HAGH CHP1 HMGCL ZFYVE21 IQGAP2 ACTB MSRB1 STBD1 CCDC107 HBP1 ECHDC2 HYI CSRP2 DCXR ENTPD5 TMEM120A SLC25A1 PSME1 EE…	1.61426e-13
drug:P2064:pyrrolidine-dn	16984	308	274	36	MIOX CXCL1 CLTC DIO1 ASS1 PAH NIT2 IGF2R MIF DAO VCAM1 ICAM1 CYP24A1 NUDT4 AHCY RPL7 SLC22A6 DNAJA1 OPLAH NUAK2 LAD1 FMO1 PDP2 SPARC HSPA5 CACYBP KRT7 PTCD3 FCGR3A IGFBP3 NCBP1 HSP90B1 CLN6 CCL20 LAMP2 CXCL10	1	131	MT1A G6PC FBP1 MDH1 SPINK1 ALDOB OAT HPD OAZ1 GSTO1 GPX3 IAH1 PCK1 HBA1 PEBP1 RPS8 RPLP1 COX4I1 TPT1 UQCRC1 NDUFB3 HBB TEX264 RPS29 SLC25A5 RPS20 CCL2 HADHB PRDX2 BNIP3 SDHC EEF1D SOD1 SKP1 UBA52 CSRP2 NDUFB9 CPQ CAT MARC2 CYB5A SULT1C2 ATP6V1E1 SLC7A7 NDUFA11 ACOX1 RPL9 NDUFA1 GSTA2 NDRG1 SOD3 PTH1R HGD TMBIM6 RPS9 ACY1 RHOA PXMP2 SLC25A3 JUNB PFDN5 APOM GRHPR KHK SEC11C ATP6V0C GLRX5 GPX4 NDUFA…	1.62981e-13
drug:P4244:ethanol|6alpha-methylprednisolone-dn	16984	524	466	84	ALOX15 DAO S1PR5 TNFRSF19 TMEM86A PROM1 CDC25B PLOD1 TRIB2 LLGL1 NPRL3 RTKN2 TNFRSF11B ADPGK SAMD5 APLNR DDR1 MIF CDK5R1 HPS4 CSPP1 REPIN1 ELK1 TMPRSS5 TBCCD1 ISYNA1 ERBB3 TGFB3 ITGB4 DOCK9 NCLN GRIN2C SRGAP2 CDK5RAP1 FBXL19 PLD2 P4HA1 SLC5A6 D2HGDH RNF182 TIA1 EHMT2 SLC15A2 LEF1 TMEM119 TTI1 GAL3ST4 POLD2 OPLAH DHCR7 SLCO3A1 AP5Z1 PLXNA3 CCND1 VGLL4 MRPS17 PLOD3 ADAP1 GPR75 MIIP ITGA6 AARS2 WNT7…	1	199	ALAS2 NIPAL4 SLC9A2 HBB SLC4A1 DBP NPY JOSD2 MYOC HEMGN SALL1 PAQR7 RETSAT PPP1R14A SLC25A42 UQCR11 PER3 MPST FECH CDK2AP2 TLR3 ID3 TMEM98 LGI4 SOX6 HAPLN2 NR2F2 CSPG4 ARPP21 MPP2 SELENBP1 TST ABCG2 MVD FBXO32 MMP15 MFAP4 RGMA S100A1 IFI27 CDK18 P2RY12 NDUFA11 KLF2 AHSP UQCRH DDC GAMT NAT8B SFRP5 PAFAH2 ST5 YPEL2 ABHD14B SMAD9 CPXM2 HYAL1 PLLP DYNLL1 MCEE EGR1 PRIMA1 GFRA2 MPZ NPDC1 NNAT SLC25A34…	1.66311e-13
drug:P2034:sucrose|antidepressant|imipramine|L-proline residue|fluoxetine-up	16984	311	285	48	NETO1 HSP90AA1 SLC24A2 SULF2 YWHAG PRKCG TUBA1A CNP MOBP NAA50 YWHAB DNM1L CLTC AGPAT5 GSK3B ERMN THY1 FAM49B PGM2L1 AGAP2 PPP1R9B ATP2A2 RAD23B ITGBL1 KPNA3 ACSL4 HSP90B1 AGTPBP1 OPALIN YME1L1 DOCK9 RAB15 ATP2C1 HTR2C DNAJA1 SPTBN1 PRPS1 TULP4 PPP2R2C HSPA5 IVNS1ABP PPA1 CDK16 BTBD1 PLXDC2 ARHGAP26 PFDN6 FGFR2	1	135	NNAT GABRA5 PRKCA PLP1 RAB6B CALM2 SGK1 ENPP2 SPCS1 RSPO2 SH3GL2 UBE2D2 PRKCB CLIP3 ATP6V0D1 TMOD2 TUBA1A PRKCE CCNI SLC25A5 B2M GNAO1 WFS1 COX7A2L CCDC107 SLC17A7 CADM3 NPTXR AMPH CCK MAL RNF14 PRDX6 MAPK10 GPM6B RPL26 RPL31 CNR1 KCNQ5 NEFL CORO2B ENAH GSTM4 NDUFS5 DSTN NDUFB6 PPP2R2B ARL6IP5 WDR1 ITPR1 DYNLRB1 NDUFV2 TIMM8B FAM3C MAP2K4 GNAI1 DENND5A EEF1A1 SLC9A4 ARHGEF9 AKT3 HBA2 GNB1 GPR22 S…	1.68754e-13
drug:P4308:-up	16984	555	472	87	SH3KBP1 LAMP3 TUBA1A CDK2AP1 MIF ADD3 HIF1A PLS3 ANGPT2 ARL6IP1 SRP9 NPM1 SNRPG PTGES3 RAN DPYSL2 CD55 COL4A1 FLRT2 ITGAV RLIM PABPC3 MFAP2 KPNA2 HSP90AB1 PPT1 TOMM20 DSP TIMP1 NNMT PSMA4 LAPTM4B TMEM123 MMP1 HNRNPK HSP90AA1 BZW2 RAI14 C1QBP IGFBP7 KRT18 LYPLA1 COL4A2 ATP6V1A KTN1 RBM14 YWHAG UBA2 ANXA2 S100A10 RPL22L1 CREG1 BZW1 CCZ1B PCNA HEY1 BLOC1S2 RPL7L1 HHEX PSMD14 PLK2 ADAR BCAT1 STARD7 T…	1	201	ALDH1A1 RPS13 RPL32 RPS5 RPS20 DCAF6 RPS29 GJA1 RPL27 TPT1 ITM2B RPL9 RPS25 RPL13A RPL34 TXNDC5 RPL3 PTX3 EEF1B2 OAZ1 GNG11 RPL6 UBC FABP4 ID1 TUBA1A NXN NTN4 RPL26 RELN RPL11 UBA52 SLC25A5 CCL2 RPL4 COX7A2 SLC25A3 ACTB TBCA MMRN1 RPS8 OST4 EEF2 RPL29 SRP14 DYNLT1 CAV1 RPL23A FAU CCNG1 MMADHC MRFAP1 RPL36 NDUFA1 NDUFAB1 FTH1 PIR COLEC12 RPL36AL GSTO1 SLC25A6 PKIG DYNLL1 CFL1 UQCRH NDUFA4 HHIP PAR…	1.73861e-13
drug:P4802:dibutyl phthalate|messenger RNA|mixture-up	16984	309	258	47	HSD3B1 SERINC5 S100A11 HSPD1 ACSL4 HSP90B1 NID2 IFITM1 IFITM3 PDIA4 SEC61G ASS1 POMP PSMB2 CDC25B CCT4 ILF2 SNRPF GRB14 PFKP ILDR2 YWHAZ TUBA1B S100A10 PLS3 CCT6A MYH9 SPHK1 MDK PRMT1 FKBP1A CALU LBH STC1 HSP90AB1 NUSAP1 ZWINT CTHRC1 TCP1 UBE2C SPC25 CCNB1 TIMP1 TGFBI CNP TMX1 TSPAN6	0.999994	125	HBB HBA2 AARD ACTB ALAS2 MYL9 TAGLN GDE1 RPL27 CFL1 IDI1 SLC25A5 COX8A MYL12A PFN1 PRDX6 MYOM2 PRDX2 NIPSNAP3B FECH RPL34 UBA52 CD59 EEF1B2 COX7A2 DBI ALAS1 NDUFB4 ACTA2 FTH1 UQCRB NSA2 NPPC PRKAR2B COX7B FLNA SLC25A4 NDUFB11 NCOA4 CSRP1 PRNP GLRX5 NR4A1 VAPA FMO5 MGST3 COX6A1 NDN RPL4 CPA2 CST3 EIF3L PFDN5 TPT1 LIPA CAP1 ILK SMPX STOM DSTN RND2 XBP1 NDUFB5 RPL10A WDR1 SLC25A3 SF3B5 BEX4 MRPL54 C…	1.76636e-13
drug:P3534:ethanol|5-amino-1-(5-phospho-D-ribosyl)imidazole|dopaminium(1+)-dn	16984	315	250	39	APOE TUBA1B FABP7 CNP TUBA1A FKBP9 ERMN HOPX TMEM86A PDPN CCP110 CUL4B C1QBP FAT1 BCAP31 NREP TMEM63A LAPTM4B TMEM88B RPL7 PCNA DEK ZIC1 OTX2 SQLE GPX8 FAP ITGB8 PKP4 SRSF6 KLK6 TMEM165 FMNL2 PERP LLGL1 MOSPD1 TMX1 PCOLCE CTNNB1	1	122	CST3 QDPR PCOLCE2 PLP1 VAT1L SOSTDC1 KCNE2 FXYD1 DBP CHCHD10 KCNJ13 COX4I1 RDH5 UQCR11 SLC22A17 RPL26 ASPA PLLP RPL3 KXD1 NDUFB7 NDUFB11 S100B DENND5A APPL2 TUBA1A DSTN NDUFA1 RPLP2 CMTM5 CKB COX6A1 GNG11 FEZ1 ARSG RPL23A NDUFS3 RPL5 RHOQ ETFB TMEM98 PBXIP1 CLU NEK9 RPL4 ITM2A UQCRC1 NDUFS8 HIGD2A SERF2 RPL13 MYRIP UQCRH ID4 VDAC2 MAP7D1 NDUFC1 MICALL1 RPS27L COQ7 COX6B1 VPS28 RPL18A ACADM RPL6 M…	1.80744e-13
drug:P2585:4,4'-diaminodiphenylmethane|dimethyl sulfoxide|inhibitor|(2Z,3Z)-bis\{amino[(2-aminophenyl)sulfanyl]methylidene\}butanedinitrile-up	16984	232	213	35	ALPP OPN3 FBN1 NKX2-1 PNMA2 SLC5A3 HEY1 ISG15 GABRE SLC38A4 NTM NCF2 LMCD1 ARL4C GPNMB SCD DAB2 IFIT3 MEGF6 CFHR1 FZD2 LAMP3 GABBR1 CD55 RGS20 SLC2A1 MSH4 GNE POLM IGFBP3 NREP TGFBI OGT DHCR7 GPRC5A	0.999998	108	CYP1A1 AKR1C2 AKR1C3 ABCG2 GNAI1 NR3C1 ACYP2 SECTM1 LARP6 ID4 RCBTB2 SYNC TGFB1I1 AHNAK2 RNASE4 LSS AKR1B10 CTSO SMARCD3 MAP1B RGL1 PINK1 EPHX1 ABHD4 ID3 HMOX1 LMO3 NDRG4 SERPINI1 GSTA4 MRPS6 SELENBP1 SOCS2 DDX60 ARMCX1 VIPR1 LIMCH1 PDGFD GSTM4 TGFBR3 TIPARP INSIG1 EDIL3 AMT RAB4B PIR PPP1R3C OLFML2A KCTD7 ID1 JUND ACSL1 SLC25A1 IL15 PMP22 HCFC1R1 DENND3 SLC22A4 CSRP2 GLYR1 MYL5 ME1 F8 PDE9A RABA…	1.88294e-13
drug:P793:ethanol|C60 fullerene|messenger RNA-dn	16984	323	280	33	SPTBN2 THY1 MIF ARL6IP1 POMP BCL7A SLC2A1 TUBA1B CDK16 RNF44 SLC24A3 TIMM17A HDAC2 FSCN1 TMEM60 TBR1 HEY1 YWHAG CTSB HAGHL PSMC4 DNTTIP1 TNNC1 NPM1 AP1AR PHLDA1 PTK2 EXOC8 LINGO1 CRYM SNRPD1 PSMA4 GAR1	1	133	RPLP1 HPCA NRN1 UBL5 DYNLL1 TSPAN7 UQCRH COX6B1 UQCR10 HIGD2A COX5A SLC17A7 SYP COX5B VPS28 COX8A ARC CKB SGK1 NDN RPL10 MT3 NDUFS3 MPPED1 SLC25A5 NDFIP1 EGR1 BTF3 CHCHD10 MAGEE1 UQCR11 COX7C FAM107A DCTN3 TUBB4A FAU KRTCAP2 EIF1B RPL9 MYL4 TBCA NDUFA6 ISCU RPL36AL THYN1 AP4S1 TCEAL5 NFE2L1 RPL31 ATP1B2 SRP14 NDUFB8 COX17 OLFM1 BRK1 ATP6V1D NDUFS7 PVALB RNF10 TIMM8B GABARAPL1 PCYOX1 PSMB6 RAB6B R…	1.96732e-13
drug:P3486:ethanol|5-amino-1-(5-phospho-D-ribosyl)imidazole|dopaminium(1+)-dn	16984	340	280	43	HSP90AB1 APOE VSNL1 TUBA1B CPLX1 PPP3CA SERPINE2 MAP2K1 SQLE DZANK1 CCT5 ATP6V1C1 HSPH1 ATP6V1A RRP1 PGM2L1 CREG2 CLSTN1 PLA2G7 SPTAN1 HEY1 KPNA2 PRPS1 HSPD1 NDRG3 NTM PSMA4 TIMM17A EPHX4 HEXB SLC12A2 CTNNB1 CCP110 YWHAZ MFHAS1 NPM1 PCNA VPS26A LAMP5 PTGES3 HNRNPU RALBP1 MBOAT2	1	133	RPL26 SCN4B CCK GOT1 PLP1 SST QDPR SRSF5 UCHL1 RASL11B PRNP SH3GL2 ATP6V0E2 SCG3 NDUFS2 NEFL COX6A1 RPL3 GABARAPL1 RPL11 RPLP1 SPARCL1 ZCCHC18 RPS27A PPM1K UQCR11 GLRX5 FAU COX4I1 SERINC1 PPP2R2B KLC1 NDUFS5 AHCYL1 ACO2 FEZ1 STMN2 APPL2 PRICKLE2 HPCA RPL4 CST3 FBXW7 CHCHD10 RPL13 TMEM246 WDR7 YPEL5 COX6B1 RPRM AP2M1 RPLP2 NDRG2 CAMK2G NDUFS1 VDAC2 ATP2B2 CRIP2 GNAI1 CAMK2B DBP SLC25A46 RPS23 ATP1…	1.96732e-13
drug:P826:Congenital pure red cell aplasia-up	16984	443	313	52	PAH C3 RBP4 APOA2 AHSG APOE AHCY APOC1 PLG SAA1 RPL22L1 IFITM3 SERPINA6 MAT1A CYP1A2 IGFBP1 SDS F2 KNG1 GLS2 SEC61G HP C9 INO80 HAMP SERPINA11 HRG ELOVL2 CFHR1 NIT2 PROC DIO1 NNMT FGL1 HAL ABCB11 SERPINA10 SLC38A4 TUBA1B APOF FETUB HOPX FADS2 LIPC LACTB2 ASS1 SREBF1 NAA38 IGF1 DHCR7 MARC1 PYGL	1	145	FGA FABP1 APOA1 TTR INMT FBP1 RNASE4 RPL26 KXD1 HPD RPS29 SDHB EEF1A1 RPLP1 APOC3 SELENBP1 RPL3 COX4I1 ALDOB PEBP1 SAR1B UBA52 NRN1 AADAC RPL31 HINT1 RPS27A QDPR P4HB GNMT RGN RPS5 RPLP2 RPS23 RPS14 HEBP1 RPL13 TTC36 RPL27A SULT1A1 GOT1 COX5A RPS11 CAT RPL10 TAT RPL34 CHCHD2 COX6B1 UQCRB RPL4 CLU CTH PGRMC1 NDUFB11 ACSL5 COX7A2 DCT PHYH EEF1B2 BHMT ALAD FTH1 UQCR11 G6PC RPL36 AASS DBI FAU MSRB1 R…	1.97731e-13
drug:P3556:ethanol|5-amino-1-(5-phospho-D-ribosyl)imidazole|dopaminium(1+)-dn	16984	305	253	35	HSP90AB1 ARGLU1 SLC12A2 HSP90B1 TUBA1A HEXB APOE CPLX1 LUC7L3 RRP1 THY1 GRM5 ZC3H11A CLSTN1 KIF5B TULP4 ZC3H15 BPTF CHD4 ARL6IP1 HSPA4L FGFR3 CREG2 SH2D5 AGT PNPO FAM81A PGM2L1 MEGF11 GJB6 PNN PSMB2 LHFPL3 PTPN11 HNRNPR	1	123	PTGDS ACTB CHCHD2 PVALB SGK1 TMX4 UNC13C RPL34 TTR CNTN1 NDUFA1 AHCYL1 TUBA1A GPX4 CHCHD10 MAP1B EEF1A2 FLYWCH1 SERINC1 CST3 GNAI1 PCP4L1 ATP2B2 GSTM5 GLUL SDHB UQCRH COX6A1 OSBPL1A PLP1 CSRP1 VPS35 CAB39 SIRT2 SECISBP2L COX5A MAL RPS15 NDFIP1 GRIA3 PPM1K PFKM NDUFA4 SCN4B PCDH9 GPR37L1 NPTN PPP1CA RAB3A GABRA1 KLC1 RAB6B UCHL1 CYGB CHIC1 MAPT RDX SMARCA2 APLP1 COX6B1 MAP1LC3A NNAT RHOQ CCK RNF14…	2.02283e-13
drug:P3558:tetrachloromethane-dn	16984	306	229	43	CYP1A2 BAAT AMACR PAH SERPINA6 C4BPA SRD5A1 APOA2 FGL1 TTPA C4B MAT1A CFHR1 HRG SLC38A4 DPYS AQP9 FETUB CPB2 CTSC LYPLA1 SLCO1A2 NIT2 ITIH2 HAL ITIH1 FAM120A KMO HES6 SLC25A13 ADK LAMP2 GLS2 ABCB11 LIPC SERPINA10 DHCR7 FMO1 BBOX1 UGT2B10 FABP7 PYGL SDS	0.999954	114	HSD17B6 RNASE4 RGN A1BG SULT1C3 SULT1A1 CTH MSMO1 NDRG2 BHMT BHMT2 CYB5A ANG OTC HACL1 CYP7A1 PGPEP1 OAT GNMT ACOX2 ALDH6A1 HSD17B2 PODN ACADM TST HSD17B4 RARRES2 COX7B ANGPTL3 GRHPR SULT1B1 GSTZ1 GHR SDC2 C5 ETFB IDI1 HSD17B11 TM7SF2 UGT2B17 ALDH3A2 C8G CPA1 ALDH9A1 KLKB1 PECR PXMP2 ADTRP ALAD TMBIM6 UGP2 QDPR FBXO3 DPT PCK1 PIGR GSTA4 NDUFA4 UQCR10 HGD CMBL FABP1 EHHADH HEXIM1 UGT2B15 DBI ALDH1…	2.03615e-13
drug:P4442:oxygen atom|2-butoxyethanol-up	16984	401	294	65	APOA2 APOE RBP4 APOC1 PLG HP PAH AHSG C3 AHCY F2 APOF MAT1A HRG SAA1 C9 CYP1A2 KNG1 TTPA SDS SERPINF2 ITIH2 SLC38A4 PROC HSD3B7 PYGL C4B CRP ASGR1 SERPINA10 HAMP ITIH1 HSPD1 GJB2 FGL1 ELOVL3 FETUB ABCB11 IGFBP1 ELOVL2 AGT IFITM3 GLS2 SERPINA6 IGF1 F12 SLC22A1 COL18A1 FASN LAMP2 AMACR CXCL1 HAL F5 MARC1 LIPC SLC25A13 NIT2 NNMT LACTB2 PPA1 AQP9 SREBF1 KRT18 CREG1	0.998874	138	APOA1 TTR FABP1 APOC3 HPD ALDOB BHMT FGA SERPINC1 GNMT FBP1 PGRMC1 ALDH1A1 CDO1 TAT PHYH RGN RNASE4 CHCHD10 CYB5A STARD10 C8G CTH DBI CAT EPHX2 ERRFI1 APOB TTC36 PIGR QDPR GOT1 P4HB INMT METTL7B SLC2A2 ANGPTL3 MARC2 AADAC SULT1A1 CLU NDRG2 LGALS9 ETFA SELENBP1 GSTA3 REEP6 AASS GSTZ1 OAT ACADM ANG TMBIM6 SAR1B NRN1 NDUFA4 APOM EHHADH SDHB HERPUD1 VKORC1 HAAO ACSM1 ALDH6A1 COX6A1 ACADVL ETFB FXYD1 …	2.1827e-13
drug:P4497:sanguinarine|alkaloid|phenylalanine|methyl|antimicrobial agent|analgesic|antifungal agent|benzophenanthridine alkaloid-dn	16984	306	256	48	TUBA1B NPPA TNFRSF12A CCT6A SLC2A1 MRPL42 ANKRD1 GPX8 MORF4L2 HSP90AB1 TNFAIP1 TFRC ADK PKP2 PSMA7 PPME1 HSPD1 HSPA9 EIF4EBP1 MAPRE1 NID2 C1QBP SNRPD1 LLGL2 STRAP PDIA3 TUBA1A FKBP1A TMEM60 TCP1 EIF4A3 FARSB HAT1 MED30 NUDT19 POLR2D AIMP2 EEF1E1 LEPROTL1 TFDP1 GTPBP4 MTPN DAG1 POMP PHACTR4 PLK2 FAM120A G3BP1	0.999983	124	UBB MYL9 COX6A1 COX5A SLC25A5 RPL9 RPL27 NDUFA4 UQCRC2 HINT1 COX6B1 UQCRH NDUFS3 RPS29 MYL6 NDUFA12 RASL11B ATP6V1E1 RPS27L UBL5 RPLP1 HIGD2A RPL36AL NDUFV1 MRPL53 VPS28 NDUFA6 UBA52 NDUFA11 TBCA NDUFC1 TMBIM4 IDH3G SEC13 CRYAB SAR1B RPS9 EGR1 TMOD1 SPCS1 TMEM242 NDUFA8 SSR2 MYL3 CST3 NDUFA7 ASB2 TCEAL8 ARL6IP5 FABP3 OXCT1 RPS6 SRSF5 SPHKAP SSU72 OAT CPE VAMP3 ATP6V0D1 GNB1 TMEM59 TIMM8B POPDC2 A…	2.25708e-13
[truncated: 8,058 more rows]
